# Supplementary material
Source: publisher figshare collection journal article supplement (https://gsajournals.figshare.com/ndownloader/files/27479699)
Supplement: Supplementary file 1 [file 27479699]

## Sheet: SsRNAseq_discardedGene_counts
File S3. Counts for genes discarded during preprocessing filtering
Low-count genes and associated log2CPM values discarded during preprocessing.
	geneID	FLF-ERR146941	FLF-ERR146942	FLF-ERR146943	iL3a-ERR146944	iL3a-ERR146945	iL3a-ERR146946	iL3-ERR146947	iL3-ERR146948	iL3-ERR146949	pfL1-ERR146950	pfL1-ERR146951	pfL1-ERR146952	ppL1-ERR146953	ppL1-ERR146954	ppL1-ERR146955	ppL3-ERR146956	ppL3-ERR146957	ppL3-ERR146958	PF-ERR146959	PF-ERR146960	PF-ERR146961
1	SSTP_0000000200	0.0554997	0.0541399	0.0561241	0	0	0	0	0	0	0	0	0.0184993	0	0	0	0.0341954	0	0	0	0.17743	0.0425767
2	SSTP_0000000700	0	0	0.053377	0	0	0.0880043	0	0	0	0	0	0	0	0	0	0	0.00878247	0	0	0	0.0232282
3	SSTP_0000000900	0.0166479	0.0516069	0	0.255782	0.146906	0.163094	0	0	0.0369046	0	0	0.0182748	0	0	0.0164327	0.0707404	0.0234701	0.110427	0	0.193577	0.186134
4	SSTP_0000001000	0.0168789	0.0172248	0.0541156	0.291425	0.205262	0.379777	0	0.0276847	0	0	0	0.0369675	0.0253728	0	0	0.235573	0.0702188	0.0871339	0	0.21982	0.207533
5	SSTP_0000001050	0.016627	0.0173376	0	0.119423	0.0547934	0.0544935	0	0	0.036766	0	0	0	0	0	0	0.0473103	0.023625	0.0892869	0.0907104	0.0483533	0
6	SSTP_0000001100	0	0.017185	0.0717199	0.222121	0.092573	0.163089	0	0	0	0	0.016434	0	0	0.0164776	0	0.0235765	0.0468532	0.197394	0.0905854	0.0972334	0.139002
7	SSTP_0000001200	0	0	0	0.0513868	0.0560482	0.0540551	0	0	0	0	0	0	0.0252817	0.0163717	0	0.0469906	0	0.021661	0	0.170973	0.0918066
8	SSTP_0000001400	0	0	0	0.0169779	0	0	0	0	0	0.0167155	0	0	0	0.016679	0	0	0.0236396	0	0.180681	0.0965469	0
9	SSTP_0000001425	0.0166059	0.0172906	0	0.017032	0.0182389	0.0362481	0	0	0	0	0	0	0	0	0	0.0236038	0.0235592	0.0445009	0	0.0965168	0.0935677
10	SSTP_0000001450	0	0	0	0.0169584	0.0181678	0.0180606	0	0	0	0.0167121	0.0327291	0.0180383	0	0.0166771	0.050253	0	0.0236342	0	0	0	0.0233519
11	SSTP_0000001500	0	0.017268	0.017907	0.170392	0.0548952	0.181367	0.13121	0.408458	0.220756	0	0.0163586	0.0182221	0.025593	0.0165929	0.0165831	0.02362	0.117787	0.0666402	0	0.0241887	0.0935287
12	SSTP_0000004600	0	0.0194988	0.0542572	0.0171511	0.0424897	0.0180228	0.0443411	0.0555055	0.073846	0	0	0	0.0252891	0.0163752	0	0.164567	0.116772	0.225822	0	0.0277235	0.0917953
13	SSTP_0000004650	0	0	0.0177266	0	0	0	0	0	0	0	0	0	0	0	0	0.0233127	0	0.0220449	0	0	0.046193
14	SSTP_0000004800	0	0	0	0	0.73354	0	0	0	0	0	0	0	0	0	0	0	0.159066	0	0	0.68543	0
15	SSTP_0000004900	0.0338163	0.0344579	0.0541834	0.188638	0.130825	0.288957	0	0	0	0	0.0165752	0	0	0	0	0.211862	0.0467746	0.152094	0.452176	0.293341	0.322191
16	SSTP_0000005000	0.0678636	0.0172357	0.0543156	0.411773	0.337406	0.684241	0	0	0.036898	0	0	0	0	0.0327193	0.0160712	0.14099	0.0700247	0.129672	0.270755	0.342747	0.275011
17	SSTP_0000005050	0	0	0.0179145	0	0	0	0	0.0274329	0	0.0167767	0.0164033	0	0	0	0	0	0.0235054	0.0220874	0.181648	0.0242829	0.0698497
18	SSTP_0000005200	0.0334022	0	0.0180346	0.0171331	0.0917043	0.0364817	0	0.054629	0.036922	0	0	0	0	0	0	0	0.0237001	0	0.0910473	0	0.0705957
19	SSTP_0000005225	0.0166985	0.0172265	0.0179163	0.0342006	0.166114	0.181616	0.109749	0.0548632	0.0370202	0	0	0	0	0.016561	0	0.0236282	0.0705446	0.0220989	0.0908413	0.0728695	0.0931638
20	SSTP_0000005250	0	0	0.0181926	0	0	0	0	0	0	0	0	0	0	0	0	0	0	0	0	0.0244228	0
21	SSTP_0000005275	0	0.017333	0	0.119364	0.0547069	0.0544421	0	0	0	0	0	0	0	0	0	0	0	0	0	0	0.0234137
22	SSTP_0000005300	0	0	0.0181102	0.0170587	0.0182789	0.090802	0	0	0	0	0	0	0	0	0	0	0	0	0	0	0.0234762
23	SSTP_0000005400	0	0	0	0.255984	0.185187	0.162686	0	0	0	0	0	0	0	0	0.016249	0.0235208	0.023371	0	0	0.0242834	0.0462026
24	SSTP_0000005700	0.0674299	0.189287	0.108103	0.0171255	0.0186372	0.108436	0	0	0	0.0168089	0.0165297	0	0	0.0164226	0.0161892	0.188312	0.116943	0.0870968	0.542702	0.512353	0.50703
25	SSTP_0000005800	0.0507865	0.0861467	0.0361526	0	0	0.0180361	0	0	0	0	0.0165913	0	0	0	0	0	0.0934639	0.0216785	0.09035	0.440217	0.390528
26	SSTP_0000005900	0.0168524	0.0688403	0.0900667	0	0	0	0	0.0276486	0	0	0	0	0.0253693	0	0.0162042	0	0.0233979	0	0.0904877	0.146381	0.207582
27	SSTP_0000006000	0	0.0171812	0.0178	0	0	0	0	0	0	0	0	0	0	0	0	0	0.023426	0.0221055	0	0.072014	0.0232382
28	SSTP_0000006050	0.0330379	0	0	0.0335173	0	0.0178404	0	0	0	0	0	0	0	0.0165883	0.0167071	0	0.117403	0.0670151	0.266889	0.119203	0.184654
29	SSTP_0000006100	0.0167249	0.0348023	0.018028	0	0.0183712	0.0182471	0.0219584	0.0273547	0.036959	0	0	0	0	0	0	0.166287	0.0474521	0	0	0.218808	0.211822
30	SSTP_0000006200	0.0167627	0	0	0.0170968	0	0	0	0	0	0	0.016456	0	0	0	0	0.0471393	0.0468375	0.0438129	0.452816	0.170268	0.115769
31	SSTP_0000006300	0	0.0515405	0	0.0341879	0	0	0	0.0275696	0	0	0	0	0	0	0	0.0705789	0.0467614	0.0436225	0.180823	0.267694	0.0692182
32	SSTP_0000006400	0.0506743	0.0172209	0	0.205681	0.149379	0.0903102	0.0221323	0.0553935	0.0369803	0	0	0	0	0	0	0.11769	0.11693	0.0652184	0.271294	0.219861	0.253235
33	SSTP_0000006425	0	0.0349493	0.018023	0.152146	0.108712	0.0720459	0	0	0	0	0	0	0	0	0	0.0945263	0	0.11243	0	0.0240384	0.0232569
34	SSTP_0000012100	0	0.0344243	0.0721624	0.017132	0.0746694	0.018047	0.0442484	0	0	0	0	0	0.0253203	0.0163984	0	0.055741	0.0471709	0.0217947	0	0.146515	0.390993
35	SSTP_0000012200	0	0.0516325	0.090022	0	0.03724	0	0.817204	0.165822	0.0370233	0	0	0.0184575	0.0253881	0	0.0270285	0.117803	0	0.0654683	0	0	0
36	SSTP_0000012300	0.0168443	0.0172248	0.0180138	0	0	0	0	0	0	0	0	0	0	0	0	0.0572383	0	0.0317913	0	0	0
37	SSTP_0000016600	0.0167393	0.0859106	0.304772	0	0	0.0181152	0	0	0	0	0	0.0367593	0.0254224	0	0	0.953273	0.234217	0.820221	0	0.0243052	0.0231585
38	SSTP_0000016800	0	0.0346827	0.107384	0	0	0	0	0	0	0.0329817	0	0	0	0	0.0166576	0.374853	0.186608	0.289046	0	0.023672	0
39	SSTP_0000016900	0	0.0171471	0.214519	0	0	0	0	0	0	0	0.0163815	0	0	0.0328926	0	0.376521	0.186996	0.460452	0	0	0.0462738
40	SSTP_0000021200	0	0	0.0180762	0.203532	0.290749	0.252775	0.0651905	0.080893	0.0363081	0.100559	0.0820934	0.0359779	0.103764	0.016728	0.0168165	0.0473812	0.0711418	0.0450536	0	0.0241214	0.093287
41	SSTP_0000022750	0	0.0354946	0.0379032	0	0.02059	0	0	0	0	0	0	0	0	0.0159223	0	0.0983859	0.106466	0.061033	0	0.0739165	0.0663841
42	SSTP_0000031000	0	0	0.0533073	0	0	0	0	0	0	0	0	0	0	0	0	0.186585	0.0466691	0.177436	0	0	0
43	SSTP_0000031100	0.0166236	0.0694193	0.0179681	0	0	0.0181479	0	0.0271791	0	0	0	0	0	0	0	0.473102	0.141837	0.536228	0	0.0241507	0
44	SSTP_0000031700	0.0856098	0.136083	1.13969	0	0	0	0	0	0	0	0	0	0.0128879	0.0171177	0	0.0483362	0	0.0305261	0.0826805	0.03476	0.029466
45	SSTP_0000032400	0.0166167	0.0172397	0.0357466	0.0170047	0	0.0724195	0	0	0.0367293	0	0	0	0	0	0	0.0471638	0.0470352	0.0443461	0.633135	0.651692	0.443431
46	SSTP_0000035150	0	0	0	0	0	0	0	0	0	0	0	0	0	0	0	0	0	0	0	0	0
47	SSTP_0000036100	0	0	0	0	0	0	0	0	0	0	0	0	0.00842808	0.164354	0.0909894	0	0	0	0	0	0
48	SSTP_0000036200	0.102746	0.0324758	0.060344	0.3344	0.241019	0.20981	0.153084	0.105607	0.0979461	0.197053	0.180748	0.239889	0.0873112	0.104824	0.0779165	0.0939199	0.0206808	0.0561534	0	0.051469	0.0242406
49	SSTP_0000037200	0	0	0	0	0	0	0	0	0	0	0	0	0	0	0	0.0441367	0	0	0	0.0911328	0.0671188
50	SSTP_0000040650	0	0	0	0	0	0	0	0	0	0	0	0	0	0	0	0.0231121	0	0.0219342	0	0	0
51	SSTP_0000054300	0.0337057	0.0344303	0.0540478	0.342645	0.409938	0.343739	0.22099	0.470103	0.148084	0.03363	0.0826406	0.0923283	0.101531	0.131534	0.0648625	0.0706751	0.0468173	0.0218092	0	0.0244021	0.0230792
52	SSTP_0000064000	0	0	0	0.0174433	0.0398484	0.0713235	0	0	0	0	0	0	0	0	0	0.05453	0.0231475	0.0361663	0	0.168191	0.0395588
53	SSTP_0000064200	0	0.0172406	0.0357567	0.187006	0.219124	0.362033	0.0218205	0.0543338	0	0	0	0	0	0.0165599	0.0165614	0.117842	0.0705531	0.0887111	0.72338	0.482661	0.420092
54	SSTP_0000064300	0	0	0	0	0	0.0179824	0	0	0	0	0	0	0	0	0	0	0.0232957	0.0648469	0	0	0.0458093
55	SSTP_0000064400	0.0335688	0.0516321	0.0718534	0.171179	0.167109	0.290121	0.0220237	0.0551262	0	0.033586	0.0329534	0.0368534	0.0254452	0.0494657	0.0326129	0.0943825	0.117222	0.197354	0.362703	0.0974212	0.0927092
56	SSTP_0000064450	0.0337759	0.0688804	0.0902174	0.0856955	0.0373378	0.0180644	0	0.0553819	0	0	0.0331153	0	0	0.0164144	0.0161672	0.0941585	0.0233865	0.260939	0	0.0977056	0.092103
57	SSTP_0000064600	0	0	0.0179586	0	0.0185681	0	0	0	0	0	0	0	0	0	0	0	0	0.0219114	0	0.0486963	0.0231629
58	SSTP_0000064800	0.033798	0	0.0180503	0.0342735	0.0186787	0.0541303	0	0	0.0369517	0	0	0	0	0.0327898	0	0.0940814	0.0934696	0.13023	0	0.0977167	0.114956
59	SSTP_0000065000	0.0169684	0.0517162	0.126757	0.205923	0.0562432	0.0360202	0	0.0277846	0.073811	0	0	0	0	0.0490895	0	0.0705094	0.0700391	0.151318	0.270809	0.416263	0.412608
60	SSTP_0000065100	0	0	0	0	0	0.0180323	0	0.0276902	0	0	0	0.0184799	0	0	0	0	0.0233538	0.0216898	0	0.0244179	0.0459517
61	SSTP_0000065200	0	0	0	0	0	0	0	0	0	0	0	0	0	0	0	0.0234983	0	0	0.0902755	0.0243979	0.0229753
62	SSTP_0000065300	0	0	0	0	0.037291	0.0180236	0	0	0	0	0	0	0.0252875	0	0	0.0234913	0	0.0433742	0.180498	0.0975592	0.114845
63	SSTP_0000065400	0	0.0344734	0.0181091	0.0171584	0.0187495	0.0360058	0	0	0	0	0	0	0	0.0163564	0	0.563905	0.303407	0.388872	0.0902407	0	0.229112
64	SSTP_0000065600	0	0	0	0	0.0374295	0	0	0.0554874	0.036913	0	0	0	0	0	0	0.0470062	0.0933916	0.151519	0.0902785	0.146738	0.0458863
65	SSTP_0000065800	0.0665743	0.017265	0.0179039	0	0.0182952	0.0181336	0	0	0	0	0	0	0	0	0	0.259775	0.07066	0.244305	0	0.0483689	0.0935126
66	SSTP_0000065900	0	0.0172126	0.090037	0.0342576	0.0186233	0	0	0.0276421	0	0	0.0165202	0.0184599	0.0761651	0	0.0324491	0.16493	0.117055	0.0872859	0	0.0243947	0.138539
67	SSTP_0000066000	0	0	0.0180167	0	0.0371835	0	0	0	0	0	0	0	0	0	0	0.0474397	0.0235593	0	0	0.0488624	0
68	SSTP_0000066100	0	0.0172334	0.126712	0.0343098	0.0187409	0.0180057	0	0	0.0368961	0	0	0	0	0	0.0160718	0.0469935	0.0233402	0.108064	0.180492	0.244778	0.137506
69	SSTP_0000066250	0.0501915	0	0.0358607	0	0.0185012	0.0181387	0	0	0	0	0	0	0	0	0.0326964	0	0.0234409	0	0.0907118	0.0486175	0.0231969
70	SSTP_0000066300	0.0165155	0.0173711	0.0358742	0.0505494	0.0541648	0.01795	0	0	0	0	0	0	0.0257578	0.0166044	0	0.0705245	0.164797	0.111846	0	0	0.0231884
71	SSTP_0000066400	0	0	0	0.0170425	0	0.0180357	0	0	0.0368791	0	0	0	0	0	0	0	0	0.043553	0	0.0242595	0.0230324
72	SSTP_0000066500	0.0168999	0.0861014	0.0180522	0.0171403	0	0.0722019	0	0.0554111	0.0369648	0.0168213	0	0	0	0	0	0.188225	0.116876	0.217162	0.180777	0.0977319	0.322022
73	SSTP_0000066550	0.0166507	0	0	0	0	0	0	0	0	0	0	0	0	0	0	0	0	0.0220028	0	0.0242143	0.0695814
74	SSTP_0000066600	0	0.0343237	0.0538513	0	0	0.0180458	0	0	0	0	0	0	0	0.0164033	0	0.0939884	0.0700424	0.108839	0.0902865	0.0729602	0.115163
75	SSTP_0000066700	0.0332574	0.0347623	0.036008	0	0.0182629	0.127209	0	0.0271976	0	0.0167378	0	0.0181643	0.0257492	0	0	0.307805	0.142063	0.201507	0	0.120954	0.0469156
76	SSTP_0000066850	0.0166863	0.0171857	0	0.0341394	0.0553673	0.0181289	0	0	0	0	0	0	0	0	0	0.165214	0.0937588	0.110113	0.090639	0.0485129	0.0464187
77	SSTP_0000066900	0	0	0.0362009	0.102936	0.074955	0.108069	0	0.111093	0.0369061	0.0673426	0.0498487	0.0185248	0.0252742	0.0490934	0.0160797	0.21152	0.116729	0.259481	0.270806	0.269254	0.389759
78	SSTP_0000066950	0	0.0344283	0	0.0170369	0	0	0	0	0	0	0	0	0	0	0	0	0.0469315	0	0	0.0241929	0.0465621
79	SSTP_0000067000	0.398341	0.167159	0.344354	0.137101	0.0372249	0.0181301	0	0.0276288	0	0.0168177	0.016512	0.000667789	0	0.0164819	0	0.0801221	0.0468944	0.0542884	0.0906742	0.0487864	0.092604
80	SSTP_0000067100	0.237378	0.155138	0.36197	0.0514762	0.0562061	0.0901133	0.310582	0	0	0.6567	0.149524	0.148202	0	0.0163749	0.0160946	0.0235131	0.0233572	0.0216437	0	0.122391	0.13767
81	SSTP_0000067200	0.0169716	0	0.0362235	0.0343281	0	0.0540439	0.488357	0.0277901	0	1.21273	0.266035	0.278024	0	0	0.0160794	0.0470178	0.070056	0	0.0902919	0.195929	0.137573
82	SSTP_0000067300	0	0	0.0180636	0	0	0	0.0664594	0.0277228	0	0.336792	0.0331524	0.0185049	0	0	0.0161844	0	0	0	0.0905369	0.0978142	0.0461009
83	SSTP_0000067800	0	0	0	0	0	0	0	0	0	0	0	0	0	0	0	0	0	0	0	0	0
84	SSTP_0000067900	0	0	0	0	0	0	0	0	0	0	0	0	0	0	0	0	0	0	0	0	0
85	SSTP_0000068300	0.0166361	0	0	0	0	0.0181335	0	0.0272192	0	0.0501379	0	0.018215	0	0	0.0241268	0.0235294	0.0707408	0	1.13551	0.505762	0.877233
86	SSTP_0000069000	0	0.0343811	0.0357541	0	0	0.0181207	0	0.02737	0	0.0669804	0.0818514	0.0366172	0.0764498	0.0495787	0.0656583	0.400897	0.211206	0.639649	0	0.0242353	0
87	SSTP_0000072100	0.0337777	0.0172203	0.0541326	0.154254	0.112018	0.14451	0.0221292	0.0276929	0.0369827	0.0336424	0.0496751	0.0369717	0.0760296	0.0328276	0.0646647	0.0470784	0.0467746	0.0217435	0.180874	0.0244271	0.0460492
88	SSTP_0000074464	0.0671776	0.0515687	0.125765	0.273661	0.35298	0.289471	0	0	0	0	0	0	0.0253851	0.0493364	0	0.306076	0.0701943	0.196522	0.180978	0.0486917	0.161688
89	SSTP_0000074476	0.0166769	0.0686127	0	0.2045	0.405682	0.217138	0	0	0	0	0	0	0	0.0164556	0.0163176	0.0941656	0	0.0658229	0.0904798	0.0242323	0.0925714
90	SSTP_0000074488	0	0.0517301	0.0536262	0.204202	0.127922	0.181061	0	0	0	0	0	0	0	0	0	0.0943292	0.0235261	0.066547	0	0.0724576	0.0933692
91	SSTP_0000074500	0.0166472	0.0172574	0.053682	0.18753	0.347839	0.126902	0	0	0	0	0.0163619	0	0.0255655	0	0	0.212471	0.0942105	0.111027	0	0	0.0233738
92	SSTP_0000074550	0.0502756	0.0515478	0.0179342	0.22216	0.370757	0.36201	0	0	0	0	0	0	0	0	0.0325546	0.070667	0.0468072	0.196991	0.181044	0.0972606	0.0462754
93	SSTP_0000074600	0.050498	0.0172078	0.0359982	0.15411	0.0558389	0.16284	0	0	0.0370224	0	0	0	0	0	0	0.212034	0.140455	0.0654758	0	0.0487712	0.161649
94	SSTP_0000081100	0.0506179	0.051667	0.0540993	0.20568	0.205191	0.0904329	0.0663556	0.304444	0.407178	0	0	0	0	0	0	0.0235578	0.0702211	0.10895	0.0905214	0.0976756	0.11532
95	SSTP_0000081200	0.134809	0.120527	0.144118	0.154215	0.0558942	0.144801	0.0220985	0.110613	0.111098	0.0504536	0.0495817	0.0369337	0.0507865	0.0328978	0.08113	0.329938	0.187331	0.196409	0	0	0
96	SSTP_0000099000	0.0672666	0.0687658	0.0359639	0.0342139	0	0.0542282	0.0220585	0.0276018	0	0	0	0.0184335	0.101457	0.0164307	0.0162127	0.917933	0.280643	0.697744	0	0	0.0922827
97	SSTP_0000114333	0.0168984	0.0344535	0.0722131	0.120021	0.0560393	0.162599	0.797063	0.0831248	0	0.0841375	0.0497012	0.0924704	0	0.0656652	0.0161664	0.0470894	0.0701775	0.0434873	0.0904564	0.171066	0.115132
98	SSTP_0000114366	0	0	0	0	0	0	0.044431	0	0	0	0	0	0	0	0	0	0	0	0	0	0
99	SSTP_0000115300	0.0842789	0.0172106	0	0.0171281	0.0931748	0.0723229	0	0	0	0	0.0165289	0.0184636	0	0	0.0161995	0.0470916	0.0701903	0.0435766	0	0.0487985	0.092238
100	SSTP_0000115450	0	0	0	0	0	0	0	0	0	0	0	0	0	0	0	0	0	0	0	0	0
101	SSTP_0000135400	0	0	0	0	0	0	0	0.0668578	0.101339	0	0	0	0	0	0	0	0	0	0	0	0
102	SSTP_0000142000	0	0	0.0358493	0	0	0	0	0.0275205	0.0739006	0.0502659	0	0.0183902	0.0760635	0.0328531	0.0649213	0.54086	0.14021	0.392956	0	0	0
103	SSTP_0000156250	0	0.0516575	0	0.27258	0.0732459	0.144907	0	0.027251	0.0736908	0.217191	0.179682	0.109432	0.102168	0.11585	0.0659379	0.401155	0.281827	0.332139	0.0905773	0.120825	0.163089
104	SSTP_0000157100	0	0.0172234	0.0541744	0.0171434	0.037374	0.0360988	0	0.0277141	0	0.0168243	0.0165728	0	0	0.0164003	0.0322886	0.376459	0.0935026	0.32567	0.0903896	0.0244393	0
105	SSTP_0000162800	0.0166457	0.051794	0	0	0.0549063	0	0.0218753	0.0544811	0.184038	0.100291	0.0654496	0.0546939	0.43485	0.149332	0.0993439	0.141696	0.0470914	0.0666112	0.0906936	0	0.0233708
106	SSTP_0000167000	0.08439	0.155046	0.162348	0.154304	0.130617	0.108547	0.0663758	0.0553705	0.222156	0.100967	0.148954	0	0.0761458	0.0328788	0	0.141384	0.0468266	0.0653849	0	0	0
107	SSTP_0000167100	0.0668164	0.0861513	0.0716907	0.0855249	0.277004	0.0908246	0.175626	0.384234	0.37039	0.151058	0.229751	0.128483	0.0510779	0	0.0987104	0.259983	0.0940643	0.110487	0	0	0.0465876
108	SSTP_0000187450	0.016885	0.0344357	0	0.171368	0.167991	0.0722475	0.13275	0.110746	0.0369801	0.0336375	0.0331098	0.0369633	0.0506834	0.032826	0.0646652	0.141223	0.0233843	0.086975	0	0.0732683	0.161169
109	SSTP_0000211000	0.0168831	0.0172325	0.0180441	0.1715	0.0746608	0.0361935	0.0663958	0.138468	0	0	0.0331108	0.0184896	0	0.0164444	0.0810475	0.0707135	0.0702609	0.0654045	0	0.0244334	0
110	SSTP_0000211050	0.0506942	0	0	0.239989	0.0560362	0.0902844	0.199237	0.38787	0.369743	0.0841153	0.115961	0.0369818	0	0.131259	0.0807736	0.141206	0.140291	0.195549	0	0.0244336	0.092047
111	SSTP_0000217200	0.20038	0.206846	0.232855	0.0512956	0.0921515	0.0181626	0.0219442	0.0822651	0.148081	0.0838989	0.0327974	0.110042	0.0766737	0.0165581	0.0329242	0.425338	0.353005	0.176951	0	0.291322	0.233127
112	SSTP_0000219300	0	0	0	0	0	0	0	0	0	0	0	0	0	0	0	0	0	0	0	0	0
113	SSTP_0000237100	0	0.0172179	0	0.068548	0.018669	0.108353	0.331927	0.636913	0.776449	0.0504566	0.0331152	0.0184841	0	0.0492279	0.0323208	0.117669	0.0701456	0.0434712	0	0	0
114	SSTP_0000244600	0	0.0812273	0.552961	0.182399	0	0	0	0	0	0.0285685	0	0.0276308	0.0760712	0	0.0202638	0.549323	0.0737537	0.26495	0	0	0
115	SSTP_0000247432	0.124249	0.147991	0.257068	0	0	0	0	0	0	0	0.0163003	0	0.0258311	0	0	0	0.0564189	0.100907	0.376191	0.538906	0.0798711
116	SSTP_0000248850	0.0835099	0.01722	0.0179189	0.136777	0.0738633	0.108932	0.0219524	0.027448	0.0370221	0.0335599	0.0656475	0.146827	0.102062	0.0661763	0.0821178	0.141778	0.140896	0.110353	0.181639	0.145734	0.139592
117	SSTP_0000251600	0	0	0.0180578	0	0.0373729	0	0.110717	0.138568	0.0739321	0.134595	0.132579	0.203456	0.278581	0.0984073	0.355205	0.211766	0.0701296	0.195419	0	0	0
118	SSTP_0000256400	0.0166397	0	0	0.153472	0.109465	0.163766	0.284592	0.108755	0.256382	0	0.0492936	0.0362874	0	0.0167004	0.0336008	0.0711567	0.0712033	0.0224632	0.181302	0.0242377	0
119	SSTP_0000259600	0	0	0	0	0	0	0	0	0	0	0	0	0	0	0	0	0	0	0	0	0
120	SSTP_0000260850	0	0	0	0	0	0	0	0	0.0368819	0	0	0	0	0	0	0	0	0	0	0	0
121	SSTP_0000261700	0	0	0	0	0	0	0	0	0	0	0	0	0	0	0	0	0	0	0	0	0
122	SSTP_0000261800	0	0	0	0	0	0	0	0	0	0	0	0	0	0	0	0	0	0	0	0	0
123	SSTP_0000263700	0.0167895	0.0344231	0.0538977	0.154055	0.0743041	0.16318	0.154238	0.165435	0.0741308	0.184748	0.115374	0.221175	0.203515	0.0659338	0.0488871	0.0707719	0.0703241	0.0438317	0	0.0487151	0.0695083
124	SSTP_0000266900	0	0	0	0.00744292	0	0.348635	0	0	0.298665	0.19792	0	3.2643e-07	0	0.163472	0.183813	0	0	0	0	0	0
125	SSTP_0000276875	0.0168965	0	0	0	0	0.0178337	0	0.0268061	0	0	0	0.0178185	0	0	0	0.0240846	0	0.0228109	0	0	0.069541
126	SSTP_0000276900	0	0	0.0178991	0	0	0.054265	0	0	0	0	0	0.0183488	0	0	0	0.141195	0	0.0875653	0.0904205	0.0727936	0.0693727
127	SSTP_0000277000	0	0	0	0.154074	0.0932702	0.144265	0	0	0	0	0	0	0	0	0	0.117516	0.0700529	0.065097	0.0902952	0.0732041	0.137888
128	SSTP_0000277100	0.0167162	0.0172026	0.0358428	0.102543	0.0184825	0.0907437	0	0	0	0	0	0	0	0	0	0.188929	0.0703721	0.110145	0.0907379	0.0971771	0.0696853
129	SSTP_0000277200	0	0	0	0.0852567	0.0737885	0.0362117	0.0219027	0	0	0	0	0	0	0.0164718	0	0.0235575	0	0.0439308	0.0905385	0.0242427	0.0463336
130	SSTP_0000277250	0	0	0	0	0	0.0175953	0	0	0	0	0	0	0	0	0	0.0937922	0.0233011	0.0444386	0	0	0.0228149
131	SSTP_0000277600	0.0336812	0.0517355	0.0720652	0.0171559	0.0372639	0	0.0442094	0	0	0.033676	0.0661183	0.0554383	0	0	0	0.141743	0.0704368	0.0219214	0	0	0.0231857
132	SSTP_0000277700	0	0	0	0.0170315	0	0.0361713	0	0.0546851	0	0	0	0	0	0	0	0.0941557	0	0.0219858	0	0.0483912	0.139056
133	SSTP_0000277800	0.101564	0.0172255	0.0542214	0.154315	0.130947	0.090147	0	0.0277358	0	0	0	0	0	0.0327631	0.0161126	0.117564	0.14015	0.173347	0.18064	0.268974	0.252587
134	SSTP_0000277900	0	0.0171646	0.0179211	0.153641	0.0741267	0.144611	0.0219847	0	0.036961	0	0	0	0.0253666	0.0164348	0.0324794	0.117602	0.0934985	0.174767	0.090395	0.267272	0.277116
135	SSTP_0000278000	0.0169584	0.0517084	0.0362001	0.154417	0.112427	0.108097	0.0221854	0.0277731	0.0369144	0	0	0.0185254	0	0.0163688	0.0160857	0.399618	0.280209	0.302843	0.090288	0.29374	0.206409
136	SSTP_0000278300	0	0.0172334	0.036169	0.0343081	0.187185	0.0541012	0.0221706	0.0277516	0.184712	0.0168342	0	0	0	0	0	0.376327	0.140193	0.216702	0	0.391443	0.298562
137	SSTP_0000278800	0.228264	0.137377	0.0867573	0.0459012	0	0	0.0296257	0	0	0.0237938	0	0	0	0.0922364	0.0775462	0.0906906	0.0917988	0.136587	0	0.0687888	0
138	SSTP_0000279800	0.0684195	0.163054	0.200109	0.0713075	0.0180652	0.0750145	0	0	0	0.0166744	0	0	0	0.0174622	0.0167752	0.0717485	0.0773334	0.0706762	0.543074	0.365711	0.258086
139	SSTP_0000289133	0	0.0172879	0	0.118667	0.199653	0.216715	0	0	0	0	0	0	0	0	0	0.0235304	0.0235433	0.0222733	0	0.0240294	0.0699595
140	SSTP_0000289166	0.0166898	0	0.0358059	0.239218	0.221365	0.290278	0	0.0274197	0	0	0.0163979	0	0	0.0496185	0.0164239	0.212574	0.023481	0.066195	0	0.0971006	0.139547
141	SSTP_0000289200	0	0.0172015	0	0.359514	0.20507	0.25272	0	0	0.110856	0.0168027	0	0	0.0253267	0.0820142	0	0	0.0467336	0	0.0903681	0.146372	0.161089
142	SSTP_0000289250	0	0	0	0.355923	0.400306	0.360308	0	0	0	0	0	0	0.0254086	0	0.016423	0.0469226	0	0.0220456	0.0901453	0.0962715	0.115962
143	SSTP_0000289300	0	0	0	0.75241	0.538745	0.452087	0.0440806	0.0275779	0.0369883	0	0	0.018422	0.0761236	0.0328766	0	0.0235354	0.11695	0.0436476	0.0904527	0.0486875	0.0923406
144	SSTP_0000289400	0.0166477	0.0172889	0	0.0852294	0.036584	0.108898	0	0	0	0	0	0	0.02563	0	0	0.070903	0.047165	0	0.18118	0.0483698	0.0701375
145	SSTP_0000289500	0	0.103383	0.0723023	0.017151	0.0187078	0.126282	0.0221617	0.027739	0.110857	0	0	0.0185092	0	0	0	0.164671	0.0934811	0.0650589	0.180735	0.122284	0.183832
146	SSTP_0000289600	0.554534	0.326908	0.377512	0.119821	0.0557711	0.108677	0.0661645	0.110388	0.0370414	0.0335991	0.0164926	0	0.0254157	0.0164649	0.0162602	0.0707065	0.0702723	0.0437373	0	0.243657	0.370087
147	SSTP_0000289633	0	0	0.0363721	0	0	0	0	0	0	0	0	0	0	0	0	0	0	0	0	0.0244316	0
148	SSTP_0000289666	0	0.0171977	0.035997	0.0171149	0.0744633	0.0180734	0	0	0.0369812	0.151181	0.14861	0.129132	0.101419	0.131388	0.226756	0.117666	0.0467671	0	0.0904282	0	0.023053
149	SSTP_0000289700	0.0167611	0.0172102	0.0718199	0.0684364	0.111234	0.054443	0	0.0550673	0	0.134356	0.0329117	0.0920249	0.0764154	0.148525	0.179727	0	0.0234616	0.109852	0	0.0730292	0.0464092
150	SSTP_0000289800	0.0501237	0.120654	0.0179263	0.171099	0.184676	0.127203	0.0439241	0	0.111123	0.0839386	0.114906	0.0550792	0.0510987	0.0828517	0.0658362	0	0.0235281	0.0221114	0	0.0486069	0
151	SSTP_0000290000	0	0	0	0	0	0	0	0	0	0	0	0	0	0	0	0	0	0	0	0	0
152	SSTP_0000290200	0.218918	0.187619	0.203216	0.136045	0.146464	0.0994123	0.142116	0.0344169	0	0.0144025	0.0621066	0.125128	0.0263293	0.099518	0.0429512	0.0573729	0.0504422	0.0696131	0	0.0576997	0.0643395
153	SSTP_0000302900	0	0.0343553	0.0178566	0.0340927	0.0367572	0.144795	0	0	0	0	0.0490387	0	0.0254666	0	0.016401	0.0470928	0.0468923	0.0220414	0	0.145242	0.162567
154	SSTP_0000303900	0	0	0.0586431	0.0461713	0.042913	0.0843457	0.0493565	0	0.0738266	0	0	0	0.0505716	0.0255458	0.0912774	0.0684066	0.0652456	0.0417092	0.312828	0.166716	0.302397
155	SSTP_0000322300	0.0169136	0	0.0180643	0.0171467	0	0	0	0	0	0.0336548	0.0165789	0	0	0	0.0484196	0.0941155	0.0233754	0.0217053	0	0	0
156	SSTP_0000322400	0.101475	0.0516821	0.126447	0.240065	0.243011	0.379077	0.0221501	0.055445	0.073938	0.0336565	0	0.0185011	0.126635	0.0328038	0.0484333	0.117661	0.0701367	0.108557	0	0.073338	0
157	SSTP_0000329000	0.0336819	0	0	0.154027	0.279281	0.216808	0	0	0.0369713	0.0839851	0.0990876	0.0184481	0.101387	0.0328359	0.0647534	0.0235277	0.0467579	0.0435468	0	0.121894	0.0921721
158	SSTP_0000334600	0.0795758	0.0956135	0.0037896	0	0	0	0.431301	0.243413	0.0104983	0	0	0.0693808	0.0656768	0.0359383	0	0.0222436	0.0206753	0.0733652	0	0.116112	0
159	SSTP_0000334700	0	0	0	0	0	0	0	0	0	0	0	0	0	0	0	0	0.0481658	0	0	0.0237477	0
160	SSTP_0000334800	0	0	0	0	0	0	0	0	0	0	0	0	0	0	0	0.0234865	0.0233414	0	0	0	0
161	SSTP_0000346200	0.0167123	0.0172933	0.0718221	0.0855928	0.110554	0.109234	0	0.109736	0	0	0.0164272	0.0366921	0.0769095	0.0498778	0	0.189621	0.117854	0.0889108	0	0.0243142	0
162	SSTP_0000353900	0.0345689	0	0.0362067	0	0.0387212	0	0	0.0768124	0	0	0	0	0	0	0.0442789	0	0	0	0	0	0
163	SSTP_0000358500	0.592939	0	0	0	0	0	0	0	0.941804	0	0	0.24108	0	6.91667e-10	0	0.34882	0.31612	0	0	6.91759e-10	0
164	SSTP_0000363500	0.101476	0.0344473	0.0903132	0.122443	0.0186927	0.0721713	0.0664435	0	0.0369535	0.235545	0.144732	0.221985	0.0506309	0.0655766	0.112939	0.117617	0.0467395	0.108487	0.542196	0.268871	0.321814
165	SSTP_0000364850	0	0.0172105	0	0.171289	0.149242	0.16252	0.132683	0.0553439	0.0369682	0	0	0	0	0	0	0.0235302	0.046755	0.0217417	0.0904041	0.048822	0.0230204
166	SSTP_0000364900	0	0.0172575	0.0180609	0.532408	0.354925	0.308296	0.0443079	0.249498	0.296886	0	0	0	0	0	0	0	0	0	0	0	0
167	SSTP_0000365700	0	0.017311	0.035887	0.0340931	0.0182482	0.0181487	0.0654783	0	0	0.0334158	0	0	0	0	0	0.118099	0	0.133723	0	0	0.0234131
168	SSTP_0000378200	1.09982e-07	0	0.352433	0	0	0	0	0	0	0	3.67208e-10	0	0	1.55727e-05	0	0	0	0	0	1.557e-05	0
169	SSTP_0000379800	0.050723	0.137769	0.0361163	0.205696	0.186876	0.216519	0	0	0.0369533	0.0504769	0.033168	0.0185075	0.0506861	0.0984292	0.0322912	0.0705674	0	0.151905	0.180728	0.146627	0.183908
170	SSTP_0000380500	0	0	0.0178865	0	0	0	0.167806	0.214081	0.352735	0	0.0491361	0.0258409	0.0623494	0	0.00510677	0.201242	0.0805403	0.0623736	0	0.0109617	0.0149733
171	SSTP_0000380600	0.0166163	0	0	0.0190253	0.0992963	0.145029	0.418915	0.52312	0.148867	0	0	0	0	0.0165863	0.0166066	0	0.023572	0.0247147	0.107326	0.136206	0.122259
172	SSTP_0000386400	0.0810114	0.0821937	0.0864068	0.343151	0.15663	0.193049	0.132409	0	0	0.080309	0.158694	0.176844	0.0300947	0	0.0191233	0.279992	0.0556261	0.128585	0.090313	0.0292035	0.081858
173	SSTP_0000386500	0.0204507	0.0039816	0.0578723	0	0.0858882	0.0233935	0.110595	0.0275053	0.0370613	0.0710227	0.0566655	0.0635121	0.0461343	0.0495125	0.0787269	0.0257837	0.0614259	0.00130879	0	0.0682835	0.0100426
174	SSTP_0000390200	0.0166377	0.0172951	0.035851	0.0340971	0	0.0725407	0.109188	0.217773	0.330799	0.116999	0	0.0364332	0.0256308	0.0664096	0.016612	0.0708694	0.0943296	0.0667682	0	0.0967554	0
175	SSTP_0000391300	0.0338184	0.0516861	0.0180618	0.291527	0.261663	0.361162	0.132893	0.249481	0.295847	0.033659	0.0663035	0.0555022	0.0506723	0	0.0323079	0.0470771	0.0701569	0.0434487	0	0.0244454	0.0460214
176	SSTP_0000392000	0.168745	0.344377	0.342632	0.0856835	0.03731	0.0542301	0.0884702	0	0.0370005	0.0168197	0	0.0184779	0.0507236	0	0	0.47098	0.187173	0.457222	0.0904854	0.0976668	0.0230483
177	SSTP_0000404800	0.0671435	0.0177096	0.0182588	0.442546	0.346921	0.506594	0.0435923	0.0540647	0	0.0337249	0.0494857	0.0359364	0	0	0.0340348	0.0239367	0.0477363	0	0	0	0
178	SSTP_0000412500	0.0507756	0.0172277	0.0722921	0	0.0561155	0	0	0	0	0	0.016588	0	0.0506149	0	0.0161223	0.940803	0.257024	0.95398	0	0.0244531	0.0229741
179	SSTP_0000414550	0.0512335	0.018532	0.0368479	0.0317389	0.017975	0.0170458	0.0413923	0	0.034094	0	0.0336086	0.0695642	0	0.0174563	0.0173474	0.024695	0.0498711	0.0464252	0	0	0.0446961
180	SSTP_0000421012	0	0	0	0	0	0	1.30948e-08	0	0	0	0	0	0	0	0.0715317	0	0	0.0559719	0	0	0
181	SSTP_0000421300	0.0591217	0.146691	0.0174628	0.137167	0.0553749	0.107921	0	0	0.0371219	0.0619847	0.0276221	0.0367521	0	0	0.028495	0	0	0	0.0912331	0	0
182	SSTP_0000421400	0	0	0	0	0	0	0	0	0	0	0	0	0	0	0	0	0	0	0	0	0
183	SSTP_0000425200	0.0169462	0.0172376	0.0180916	0.0867919	0.0749062	0.0180339	0	0	0	0	0.0332128	0	0.0253043	0	0	0.0235225	0.0233673	0.0216667	0	0	0
184	SSTP_0000425300	0.0337998	0.0172221	0.0361056	0.154279	0.0934023	0.162491	0	0.0831202	0	0.0504691	0.0331348	0.036985	0.050662	0.0492154	0.0484562	0.117662	0.0467594	0.0651689	0.361625	0.439823	0.322108
185	SSTP_0000425600	0.0337835	0	0.0361014	0	0.0746943	0.0180882	0.309935	0.0277029	0.148103	0.0841691	0.0662528	0.0554842	0.0253781	0.0328728	0.0647846	0	0.0702394	0	0	0	0
186	SSTP_0000437900	0	0	0	0	0	0	0.106104	0	0	0.301044	1.61813e-10	0.145207	0	0.224988	0.094054	0	0	0	0	0	0
187	SSTP_0000440600	0.0168726	0.0172504	0.054129	0	0.0186582	0	0	0.0276947	0	0.0168467	0.0165515	0	0	0	0	0.0236182	0.0234679	0.08752	0.090752	0.0244454	0
188	SSTP_0000441100	0	0	0	0	0	0	0	0	0	0	0	0	0	0	0	0	0	0	0	0	0
189	SSTP_0000441200	0	0	0	0	0	0	0	0	0	0	0	0	0	0	0	0.0469864	0	0	0	0	0
190	SSTP_0000450500	0	0	0.036117	0	0.0186883	0	0	0	0	0.0672868	0.0165737	0.0184949	0.0253131	0.0163928	0.0161337	0.0705617	0	0.0650909	0	0	0
191	SSTP_0000450600	0.0338432	0.0344614	0.0903573	0.377322	0.355343	0.360956	0	0.0277335	0	0.0168315	0.0165859	0.0185071	0	0.163985	0.0484112	0.400025	0.327279	0.260417	0	0.0244538	0.0229919
192	SSTP_0000451300	0	0	0	0.256544	0.148836	0.162527	0.264771	0.469349	0.40647	0	0	0	0.0253341	0.01641	0	0	0	0.0435282	0	0	0.0230331
193	SSTP_0000452700	0.0904609	0.0898772	0.000639522	0.0475818	0	0.014037	0	0	0	0.0235419	0	0.0265103	0	0	0	0.306752	0.132006	0.0823416	0	0.000535588	0
194	SSTP_0000452800	0.0332463	0.102982	0.035669	0	0	0	0	0	0	0	0	0	0	0	0.0163932	0.0235254	0	0.0220327	0	0	0
195	SSTP_0000453000	0.0336065	0.0171966	0.0539238	0.0513328	0.0557595	0.0361966	0	0	0	0	0	0	0	0.016452	0	0.0471063	0.0468135	0.109218	0.45261	0.340991	0.32348
196	SSTP_0000453100	0.0339101	0.0689477	0.0180979	0.0514742	0.149879	0.180217	0	0.0555408	0.036924	0	0.0166133	0	0	0.130992	0	0.211608	0.303628	0.476134	0.180618	0.293727	0.206493
197	SSTP_0000454500	0	0	0.0182775	0.270579	0.217857	0.287374	0	0	0	0	0	0	0	0	0	0.0719405	0.0238685	0	0	0.0966356	0.0464325
198	SSTP_0000454600	0	0.0172312	0.0361475	0.171516	0.112231	0.306773	0.0664811	0	0	0.0168321	0.0165883	0	0	0	0	0.0705876	0.0701259	0.108481	0.180774	0.122279	0.275852
199	SSTP_0000454800	0.285932	0.189078	0.305704	0.102632	0.0929885	0.090355	0	0	0	0	0	0	0	0.0164233	0.0324045	0.0941157	0.0935154	0.0653742	0.180832	0.0487223	0.0922319
200	SSTP_0000454900	0.0166878	0	0	0.290589	0.239182	0.272684	0.328967	0.328725	0.148044	0	0	0.0183191	0	0.0166016	0.0165161	0	0	0.0221951	0.0909108	0.0485571	0
201	SSTP_0000455100	0	0	0	0	0	0	0	0	0	0	0	0	0	0	0	0	0	0	0	0	0
202	SSTP_0000455500	0	0	0	0	0	0	0	0	0	0	0	0	0	0	0	0	0	0	0	0	0
203	SSTP_0000455525	0	0	0	0	0	0	0	0	0	0	0	0	0	0	0	0	0	0	0	0	0
204	SSTP_0000455600	0	0	0	0	0	0	0	0	0	0	0	0	0	0	0	0	0	0	0	0	0
205	SSTP_0000455800	0.0333473	0.0172313	0.0536928	0.0512438	0.0183881	0.0181507	0	0	0	0	0.016381	0	0	0.0331308	0	0.188985	0.117535	0.199302	0.0908764	0.218219	0.186554
206	SSTP_0000455900	0.0498973	0.0345462	0.107421	0.051091	0	0.018133	0	0	0	0	0	0	0	0	0	0.0708381	0.0706827	0.0666859	0.181014	0.144976	0
207	SSTP_0000456000	0	0	0	0	0	0	0	0	0	0	0	0	0	0	0	0	0	0.0220322	0	0.119022	0.0692497
208	SSTP_0000456200	0	0.0171781	0.017925	0.0341603	0.0185108	0	0	0	0	0.0502957	0	0	0.0254202	0.0164707	0	0.188532	0.0234179	0.0657687	0	0.0242997	0.0926304
209	SSTP_0000456300	0	0	0	0	0	0	0	0	0	0	0	0	0	0	0	0	0	0	0	0	0
210	SSTP_0000458500	0.0169439	0	0.269278	0	0	0	0.0222466	0	0	0	0	0	0	0	0	0	0	0	0	0	0
211	SSTP_0000458600	0.0164958	0.0346458	0.763541	0	0	0.0359027	0	0	0	0	0	0	0	0	0	0.0982311	0.0469975	0.0446711	0	0	0
212	SSTP_0000458700	0.121455	0.125637	0.282616	0	0.0371444	0	0	0	0	0.0272516	0	0	0	0	0	0	0	0	0	0.26274	0.0763387
213	SSTP_0000465500	0	0	0.0200611	0.0178044	0	0	0	0	0	0	0	0	0	0	0	0	0	0.0189393	0.0898261	0	0
214	SSTP_0000465700	0.117684	0	0.0179856	0.0171245	0.0557937	0.0724667	0.0220632	0.0276074	0.0370501	0.0672197	0.0659966	0.0922303	0	0.0494069	0.0325261	0.117879	0.117148	0.262456	0.0906066	0.341242	0.185073
215	SSTP_0000465800	0	0	0	0.0170886	0.0184703	0.0181476	0	0	0	0.0167707	0	0	0	0	0	0.0472558	0.0234654	0	0	0.0971194	0.116205
216	SSTP_0000465900	0.0166767	0	0	0	0	0	0	0	0.0369865	0	0	0	0	0	0	0	0	0	0.0908506	0.0242625	0.0700119
217	SSTP_0000466000	0.0168909	0.0172249	0	0.0171438	0.0186724	0	0.0442671	0.027697	0	0.0168257	0	0	0	0.016421	0	0.047096	0.140371	0.0217554	0.0904716	0.122162	0.138215
218	SSTP_0000466100	0	0	0	0.0227469	0	0	0	0.0340968	0.0976467	0	0	0	0	0	0.0322199	0.301827	0	0.240995	0	0	0
219	SSTP_0000466300	0	0.05164	0.0364869	0	0.037286	0.0180784	0	0	0.0369988	0.0168142	0.0165349	0.0554051	0	0	0	0.0706394	0.0233959	0.0435621	0.090479	0.097622	0.0691623
220	SSTP_0000467700	0.0302252	0	0.318183	0.0883091	0	0.0484565	0	0	0.098416	0.0606841	0.0231542	0.0276922	0	0	0	0.504294	0	0.116341	0	0.0496961	0.0342266
221	SSTP_0000468000	0	0	0.0180636	0.154295	0.0373882	0.0721639	0.066446	0.0554431	0	0.0336492	0.0165786	0	0.0253129	0	0.0322627	0.0940868	0.0233681	0.0650812	0.0903592	0.0244435	0.137901
222	SSTP_0000468100	0.0167226	0	0	0	0	0	0	0	0	0	0	0	0	0	0	0	0.0238549	0	0	0.0487296	0
223	SSTP_0000468200	0	0.0175893	0	0.0168308	0.018055	0.017834	0	0	0	0.0333787	0	0.0177662	0	0	0.0168651	0.0475321	0.0944685	0.0225206	0	0.0718504	0.0693731
224	SSTP_0000468250	0	0.0171664	0.0358297	0	0.0370245	0.0361725	0.0219633	0	0.0369761	0.0167486	0	0	0	0.0164476	0.0162681	0.141211	0.093538	0.0437488	0.0904308	0.072865	0.16184
225	SSTP_0000468350	0.0497833	0.104559	0.0360024	0.0169562	0.0181436	0	0.0867486	0	0	0.200445	0.180233	0.108002	0.129367	0.183517	0.0837794	0.141767	0.0709178	0.157284	0	0.0481984	0.093321
226	SSTP_0000468400	0.0335463	0.0860117	0.0359047	0	0.018551	0	0.0660279	0	0.0741068	0.134269	0.0823314	0.0920765	0.0254358	0.0494459	0.0489064	0.0471688	0.117167	0.153441	0.09062	0.0486784	0.0463369
227	SSTP_0000468500	0.0168332	0.0344217	0.0180011	0.0342512	0.0372294	0.0361947	0.0220811	0	0	0.100848	0.0660517	0.0553609	0.101581	0.049353	0.0487014	0.0471275	0.117075	0.174655	0	0.0731667	0.0230988
228	SSTP_0000473000	0	0	0.0715119	0.204819	0.110474	0.0906108	0.197144	0.0547491	0.147819	0.0167494	0.0163721	0.0915578	0.0509927	0.0661308	0.0492636	0.165132	0.0704208	0.0220621	0.181341	0	0.0465055
229	SSTP_0000473250	0	0	0	0.101843	0.0363478	0.0361971	0	0.108232	0.036443	0	0	0	0.0257176	0	0	0.0708985	0.0236372	0.0223797	0	0.120595	0.0935369
230	SSTP_0000475200	0.117378	0.137579	0.0717888	0.0513078	0	0.0181189	0.0220029	0.165219	0.444514	0.0335576	0.0164615	0.0184101	0.0254285	0.0164772	0.0162974	0.235776	0.0937067	0.175311	0.0905939	0.194658	0.0926471
231	SSTP_0000475600	0.016763	0.0171967	0.0358871	0.0170996	0.0556158	0.0724842	0.241976	0.0550587	0.185199	0.03356	0	0.0736141	0.0508735	0.0494519	0.0652282	0.801837	0.515575	0.416609	0.0906135	0.121656	0.0463372
232	SSTP_0000476400	0.0166686	0.0527782	0.0724839	0.185174	0.126409	0.0356747	0	0	0	0.0667703	0.0490728	0.0355392	0.0518632	0.0167022	0.0168683	0.237706	0.188974	0.202725	0.0892626	0.0239547	0.0462576
233	SSTP_0000476900	0	0	0.11346	0.109246	0.115817	0.112884	0	0	0.475788	0.434734	0.108056	0.119865	0	0	0	0.273101	0	0.124771	0	0	0
234	SSTP_0000479750	0	0	0	0	0	0	0	0	0	0	0	0	0	0	0	0	0	0	0	0	0
235	SSTP_0000480400	0	0	0	0	0	0	0	0	0	0	0	0	0	0	0	0	0	0	0	0	0
236	SSTP_0000480500	0.0167177	0.105335	1.17267	0.0170896	0.0742661	0.0370416	0.131252	0.282557	0.348458	0.101102	0.0406388	0.0675209	0	0.0504262	0	0.0242974	0.0246658	0	0.0907491	0	0.070536
237	SSTP_0000482800	0	0	0	0	0	0	0	0	0	0	0	0	0	0	0	0	0	0	0	0	0
238	SSTP_0000483000	0	0	0.0180053	0	0	0	0	0	0	0.0168021	0.0165312	0	0.0253337	0.049234	0	0.0471267	0.0234001	0.021753	0	0	0
239	SSTP_0000483300	0.0586161	0.00861464	0.467478	0.0085576	0	0	0	0.0537454	0.0241708	0.00839952	0	0	0	0	0	0	0	0.0110208	0.136328	0.0121691	0.0232475
240	SSTP_0000485200	0.0336307	0.0172005	0.0179844	0	0	0	0	0.0276041	0	0.184765	0.0164967	0.0184386	0.0761721	0.0164485	0.146117	0.40041	0.117032	0.28384	0.181032	0.0974677	0.0230964
241	SSTP_0000487300	0.10151	0.0689053	0.0361352	0.0171468	0.0373969	0	0	0	0	0.117791	0.099495	0.0740109	0.0759433	0.196718	0.0806552	0.0940954	0.14022	0.0216933	0.180733	0.220034	0.18387
242	SSTP_0000488000	0	0	0	0.0170526	0	0	0	0	0	0	0	0	0	0	0	0	0	0.0867006	0	0	0.0688299
243	SSTP_0000488200	0.033712	0.017201	0	0.601737	0.531608	0.597982	0	0	0	0	0	0.0369166	0	0.01641	0.0161729	0.0705762	0.0701201	0	0.271185	0	0.138158
244	SSTP_0000490500	0	0.0175792	0.0362571	0.0848922	0.0910924	0.108538	0.326592	0.270153	0.327183	0.235691	0.328701	0.16196	0.234679	0.268655	0.219554	0.0713819	0.0237735	0	0	0.0241779	0
245	SSTP_0000491950	0.016763	0	0.0179653	0.0685081	0.0370744	0.0545219	0.044019	0.0275377	0.07421	0.0840443	0.0822986	0.0552462	0	0	0.0327601	0.0236406	0.0469733	0.0440518	0	0.0730684	0.0697261
246	SSTP_0000492000	0.184324	0.0860982	0.14364	0.051344	0.0370707	0	0.0220025	0	0.0370889	0	0	0.018406	0	0	0.0163623	0	0	0.0220064	0.181621	0.0486939	0.0464457
247	SSTP_0000492300	0.016633	0	0	0.170103	0.0364466	0.0181158	0.021758	0.189807	0.254901	0.0335263	0.0164147	0.0542803	0	0.0501841	0.0504066	0.0473443	0.118533	0.13508	0.0904395	0	0.0702698
248	SSTP_0000492350	0	0.0171627	0	0	0	0.0360589	0	0.0542043	0	0	0	0	0	0.0329974	0	0.0704355	0	0.0441672	0	0.0240733	0.0697368
249	SSTP_0000492400	0	0	0.017949	0.0171057	0.0556279	0.0181306	0	0	0	0	0	0	0	0	0	0.0943686	0.0703393	0.109705	0	0.0486729	0
250	SSTP_0000492500	0	0	0	0	0.0186518	0.0180442	0	0.0276667	0	0	0	0	0	0	0	0.070543	0	0.130314	0.180681	0.0732085	0.114996
251	SSTP_0000492700	0	0	0	0.0197341	0.0213869	0.040756	0.0220887	0.0276407	0	0	0	0	0.0253437	0	0	0.0782451	0.0285929	0.0435264	0.199118	0.0277207	0.0528411
252	SSTP_0000492800	0	0	0	0	0	0	0	0	0	0	0	0	0	0.0164459	0	0	0	0	0	0.0524894	0
253	SSTP_0000492850	0.0329187	0.0514139	0	0	0	0.017964	0	0	0	0	0	0	0.0507706	0.0164393	0.0164705	0	0	0.0661622	0.0896468	0.0956647	0.196235
254	SSTP_0000503200	0.033455	0.103417	0.161517	0	0	0	0.0219775	0	0.0370667	0	0.0164348	0	0	0.0165591	0	0	0	0.0662739	0	0.0972694	0.0931403
255	SSTP_0000503300	0.0337985	0.017228	0.0180544	0	0	0	0.022142	0	0.0369935	0	0	0	0.0253498	0	0.016168	0	0.0233945	0	0	0.0244395	0
256	SSTP_0000503700	0.0505323	0.0516104	0.0720202	0.0342413	0	0.0180788	0	0.0276362	0.110978	0.0672144	0.132147	0.0369077	0.0760873	0.0492853	0.0486037	0.141243	0.0233908	0.087159	0	0.0244185	0.0461192
257	SSTP_0000505100	0.0166806	0	0.0359435	0.0683701	0.0366554	0.0727279	0.394091	0.518546	0.737005	0	0	0.0182636	0	0.0499359	0	0.378944	0.165503	0.401644	0	0	0.0468966
258	SSTP_0000507000	0	0	0	0.648003	0.943217	0.81292	0	0	0	0	0	0	0.0253503	0	0	0.0470162	0.0233564	0.0436962	0	0	0
259	SSTP_0000507100	0	0.0515509	0	0.188057	0.129968	0.271351	0	0.0275615	0.0369939	0	0	0	0	0.0164438	0	0	0	0.0436813	0	0.146007	0.184807
260	SSTP_0000508700	0.0339859	0.120658	0.0544178	0.102949	0.112434	0.126115	0.0887458	0	0	0.0168378	0.0332332	0.0555789	0.0256189	0.0982147	0.0482574	0.517749	0.280652	0.432634	0.0902902	0.196862	0.206412
261	SSTP_0000508800	0.033899	0.0689376	0.108558	0.120088	0.131104	0.180228	0.0221785	0.0277632	0.0369248	0.0168353	0	0.0370411	0.0505787	0	0.032194	0.14107	0.186848	0.259763	0.451548	0.36708	0.413044
262	SSTP_0000508900	0.0388715	0.0197707	0	0	0	0	0	0.0276907	0	0	0	0	0	0	0.0201392	0.226587	0.128734	0.157211	0	0.0274407	0.0532654
263	SSTP_0000509700	0.0586161	0.00861464	0.467478	0.0085576	0	0	0	0.0537454	0.0241708	0.00839952	0	0	0	0	0	0	0	0.0110208	0.136328	0.0121691	0.0232475
264	SSTP_0000509800	0.0716632	0	0.206605	0	0.0392976	0.0438811	0.035757	0	0	0	0	0	0	0	0	0.250234	0.029259	0.102838	0.188358	0.245313	0.0985852
265	SSTP_0000521200	0.0537643	0.063413	0.0746053	0	0.0224974	0	0	0	0	0.113695	0.0229305	0.0487184	0	0.0956158	0	0.0471607	0	0.0899935	0	0	0.0601556
266	SSTP_0000521300	0	0.0451688	0	0.0674168	0	0.0264077	0	0	0	0.0249726	0	0.0725554	0	0	0	0.0631477	0.0307651	0.135715	0	0	0
267	SSTP_0000523600	0.0338093	0	0.0361128	0.171424	0.0747401	0.162446	0.0664255	0.0831349	0.258748	0.134587	0.0165711	0.0369892	0.0506485	0.0820021	0.0645802	0.0705848	0.0935011	0.065137	0	0	0.0229988
268	SSTP_0000524300	0.177103	0.172413	0.0744001	0.145058	0.333351	0.153263	0.0614526	0.106386	0.134189	0.0335304	0.0520666	0.0887628	0.0252707	0.0535588	0.102173	0.152972	0.125679	0.0950992	0.0822006	0.0473243	0.043883
269	SSTP_0000526100	0.0333324	0.0172687	0	0.341629	0.311959	0.217965	0.153398	0.27313	0.221454	0.0334947	0.0819043	0.127887	0.153723	0.0830152	0.0992983	0.0236518	0.0471388	0.0888662	0	0	0
270	SSTP_0000530600	0.22208	0.207856	0.133607	0	0	0	0	0	0	0.0677153	0.033154	0	0.0510122	0.107874	0.0937349	0.244176	0.0854517	0.268145	0.128324	0.096272	0.0715011
271	SSTP_0000535725	0.0330646	0	0.0298002	0.10234	0	0.109157	0	0	0	0	0	0	0.0255583	0	0.0300755	0	0.0234903	0	0	0	0
272	SSTP_0000535800	0	0	0	0	0	0	0	0	0	0	0	0	0	0	0	0	0	0	0	0	0
273	SSTP_0000537500	0	0	0.0178201	0	0	0	0	0	0	0	0	0	0.0255897	0	0.0331563	0	0	0	0	0.02382	0
274	SSTP_0000537600	0	0.0172288	0.0180776	0.0171495	0.0187107	0.0180325	0.177304	0.110966	0.147754	0	0.0663711	0.129566	0.12651	0.0327686	0.257843	0.0470341	0.09345	0.0433432	0	0	0
275	SSTP_0000538900	0	0	0	0	0	0	0	0	0	0	0	0	0	0	0	0	0	0	0	0	0
276	SSTP_0000546200	0.0338114	0.0689088	0.0180588	0.0342943	0.0373735	0.0902946	0.0442912	0.0554314	0.0369816	0.286076	0.381176	0.314472	0.0506744	0.147681	0.177718	0.0235386	0.0467715	0.130365	0	0	0
277	SSTP_0000555000	0.0331288	0.0693836	0.0179426	0.0679796	0.127228	0.162969	0.0871043	0	0.25573	0.100033	0.0163469	0	0.0771029	0.066441	0.0667303	0.566401	0.188916	0.536056	0	0.0241028	0.0467503
278	SSTP_0000564700	0	0.034445	0.0361028	0.0171423	0.0186786	0	0	0	0	0.117764	0.0165658	0.055473	0.0506709	0.114858	0.145404	0.588383	0.514423	0.130377	0	0.0488676	0
279	SSTP_0000589700	0	0	0.0179366	0	0.0185403	0	0	0	0	0	0	0	0	0	0	0.164912	0.0468135	0.175126	0	0.0243185	0.0694224
280	SSTP_0000617700	0.0912667	0.0862794	0.0585081	0.0346175	0.0172739	0.0173762	0	0	0	0.0173045	0	0	0.0253387	0.0406908	0.0149723	0.0506616	0.0674502	0.0736483	0.174651	0.0265912	0.0207653
281	SSTP_0000621200	0.0675934	0.120557	0.0902592	0.171423	0.224149	0.144458	0.0221379	0.0554109	0.258824	0.0336468	0.0331324	0.0369825	0.126673	0.0492228	0.0161551	0.141209	0.140294	0.260737	0.0904163	0.0488682	0.115061
282	SSTP_0000626000	0.0167305	0.0172575	0.107706	0.0856599	0.0924803	0.0363872	0.0219879	0.0549774	0	0	0.0164366	0.0183838	0.0511585	0	0	0.473442	0.188426	0.221323	0.0910087	0.0973294	0.0233306
283	SSTP_0000628800	0.0338149	0.0516886	0.090304	0.0857471	0.0186888	0.018062	0.110741	0.277189	0.332889	0.0673212	0.0828734	0.0555018	0.126707	0.0656477	0.11311	0.0706267	0.0701685	0.0217316	0	0.0244452	0
284	SSTP_0000633100	0	0.00664858	0	0	0	0	0	0	0	0	0.0406768	0.0310064	0	0	0	0.0272895	0	0.0354016	0.70826	0.291307	0.199566
285	SSTP_0000636175	0.0335904	0	0.0718689	0.0342091	0	0	0	0	0	0.0167848	0	0.0368506	0	0.0493385	0.113667	0	0.0467982	0.0218368	0	0.170428	0.0461985
286	SSTP_0000636200	0.0504403	0	0.0719494	0.068502	0.0557988	0	0	0.0276102	0	0.0504211	0.0330013	0.0368944	0.0508505	0.0494129	0.113859	0.0707346	0.0234334	0.0218758	0	0.073131	0.046277
287	SSTP_0000636300	0.0505256	0.0860704	0.072029	0	0	0	0	0.0276404	0	0.0336259	0.0330381	0.0184597	0.0761821	0.164498	0.129839	0.0235656	0.0234152	0	0	0	0.0692891
288	SSTP_0000636400	0.0167998	0.0171994	0.107837	0.0342233	0.0185846	0	0	0	0.0740522	0.0167934	0.0659491	0.0184323	0.101619	0.0987463	0.113767	0.0235592	0.0234145	0.0218582	0.27163	0.0487148	0.0462396
289	SSTP_0000636500	0.101569	0.0689165	0.216908	0.102898	0.0935409	0.036073	0	0.0832168	0	0.0168301	0.0829536	0.0370171	0.328996	0.196656	0.338541	0.0235206	0.0700988	0.108398	0.361406	0.342383	0.252704
290	SSTP_0000636600	0.0674046	0.103264	0.108076	0.0171278	0.0186305	0.0180864	0.044189	0	0	0.0840536	0.0495757	0.0369232	0.152239	0.24653	0.210704	0.0235504	0.0234006	0.0217988	0.090494	0.243967	0.0461385
291	SSTP_0000636700	0.0168444	0.017205	0.0360116	0.0513666	0.0186232	0.0180801	0	0	0	0.0168051	0.0330377	0.0184551	0.0253668	0.0164314	0.0162049	0.0470878	0.0935767	0.130769	0.0904701	0.0731642	0.0922573
292	SSTP_0000636733	0	0	0	0	0	0	0	0	0	0	0	0	0	0	0	0	0	0.0215779	0	0	0
293	SSTP_0000636766	0	0	0	0	0	0	0	0.0272972	0	0.0167489	0.0163943	0.0182686	0	0	0	0	0.0236133	0.044529	0	0.0242419	0.0702864
294	SSTP_0000636800	0	0.0171898	0	0.0684034	0	0.0180975	0	0.0275703	0	0	0.0329531	0	0	0	0	0.0470962	0.0234036	0.0874047	0	0.121713	0.0693339
295	SSTP_0000637000	0	0	0	0.0514254	0	0	0.0441715	0	0	0.0168219	0.0660642	0.0184649	0.0254461	0.0494581	0	0.0235993	0.023453	0	0	0.0487984	0
296	SSTP_0000637100	0.0501649	0.0688354	0.0717119	0.341893	0.536162	0.417519	0.0658639	0.0549545	0.0370316	0.0167768	0	0.018372	0	0.0165175	0.0327697	0.0236203	0.211143	0.0881205	0.272315	0.243024	0.394968
297	SSTP_0000637700	0	0	0	0	0	0	0	0.00251621	0.0612418	0	0	0	0	0	0.0169838	0	0	0	0	0	0
298	SSTP_0000638000	0	0	0.0180148	0	0	0.072184	0	0	0	0	0	0	0	0	0	0	0	0.02173	0.0903416	0.0243889	0
299	SSTP_0000639100	0.0168984	0.0688899	0.0180519	0.325704	0.336223	0.32503	0.132827	0.332466	0.22185	0.0841169	0.0828311	0.110947	0.0760038	0.0492228	0.0807751	0.0706044	0.0935291	0.10864	0.180832	0.171038	0.0690366
300	SSTP_0000639200	0.0508211	0.0172336	0.0180861	0.0686179	0.149764	0.18032	0	0	0	0	0.0166011	0.0185165	0	0.0491512	0.0161112	0.070557	0.0700921	0.129998	0.271024	0.0733996	0
301	SSTP_0000639300	0.0167899	0.0515737	0.0179616	0.273646	0.35292	0.343856	0.0220364	0	0	0	0	0	0.0253943	0	0.0162466	0.164843	0.0936174	0.131101	0.271486	0.170417	0.254221
302	SSTP_0000639400	0	0	0.018081	0.0685934	0.224587	0.234302	0	0	0	0.0168285	0	0	0	0	0	0.141052	0.0934144	0.151577	0.090301	0.097835	0.0688527
303	SSTP_0000639500	0.0332602	0.0690043	0	0.0170225	0.109683	0.0181189	0	0	0	0	0	0	0	0	0	0.0235969	0.0470685	0.0665748	0.09052	0.024165	0.0233591
304	SSTP_0000639600	0	0	0	0.0171419	0.0934977	0.162256	0	0	0	0	0.0165831	0	0	0	0	0.02351	0.0700674	0.0216701	0.180622	0.097779	0.229629
305	SSTP_0000641200	0	0.01724	0	0.223095	0.13116	0.0901313	0.022187	0.0555485	0	0	0	0	0	0	0	0.0470347	0	0	0.63231	0.146886	0.11475
306	SSTP_0000641400	0.0339057	0.0517012	0.0723808	0.13724	0.112394	0.162156	0.155262	0.222129	0.258408	0	0	0	0	0.01637	0.016089	0.0940268	0.0233508	0.194725	0.451441	0.29368	0.344063
307	SSTP_0000641700	0.134756	0.223558	0.216048	0	0	0.0361271	0	0	0	0.117587	0.214726	0.184497	0.0253428	0.131314	0.113277	0.0470518	0.116878	0.0435306	0.0904006	0.0487617	0.0921449
308	SSTP_0000641750	0.0842385	0	0.0540278	0.0171255	0.0372536	0.0542508	0.176726	0	0	0.151275	0.231309	0.166127	0.355203	0.197214	0.259329	0.0941936	0.210589	0.130794	0.0904875	0.0731783	0.0230688
309	SSTP_0000641800	0.0333492	0.0525844	0.108707	0.0507497	0.0363226	0.0180085	0.0650634	0.026897	0	0.0838157	0.131028	0.0894175	0.0259873	0.0669785	0.151781	0.0474512	0.0711053	0.0676465	0	0.0481303	0.0232993
310	SSTP_0000641900	0	0	0	0	0.0183403	0	0	0	0	0	0	0	0	0	0	0	0.0234188	0.0440218	0	0	0
311	SSTP_0000642000	0	0	0.0541884	0	0.0186779	0	0	0.0277245	0	0	0.0165686	0	0.0255025	0	0	0.023658	0	0	0	0	0
312	SSTP_0000642100	0	0	0.0205424	0	0	0	0.220493	0.0316775	0	0.0335708	0.0164874	0	0.0253666	0	0.0162171	0.0470682	0.116934	0.087238	0	0	0.0231661
313	SSTP_0000642300	0.0168865	0.0172194	0.0902112	0.137107	0.112005	0.0361271	0.0221271	0	0	0	0	0	0.0253441	0	0	0.0789155	0.0701592	0.0869831	0.090438	0.219826	0.230262
314	SSTP_0000642550	0	0	0.0537403	0	0.036593	0.0181471	0.0437226	0.0544534	0	0	0	0	0	0	0	0.0236201	0.0235754	0.0667341	0	0	0.0701597
315	SSTP_0000642600	0.380021	0.181415	0.524475	0	0.0373911	0.0375376	0	0	0	0.0221827	0.0218988	0	0	0	0.0422874	0	0	0	0	0	0.023028
316	SSTP_0000642800	0.0501678	0	0.0717646	0	0	0.0545118	0.900813	0.137421	0.185279	0.0167935	0	0	0	0	0	0.047314	0	0.0220849	0	0.0486206	0.0931131
317	SSTP_0000644200	0.0506368	0.0172123	0	0.0342626	0.0186591	0.036114	0.132705	0.138385	0.332726	0.117693	0.0827454	0.0739019	0.0760043	0.0492256	0.0484873	0.352956	0.303908	0.326078	0.0904038	0	0.161128
318	SSTP_0000644400	0.0509341	0.051726	0.0362325	0.0686551	0.168815	0.108035	0.0222018	0.0277961	0	0	0.0166321	0	0.0252672	0	0.0642658	0.0470022	0.163406	0.23766	0.361036	0.318422	0.389534
319	SSTP_0000644500	0	0.0171931	0.0715192	0	0.0368327	0	0	0	0	0	0	0	0	0	0	0.0943428	0.0234708	0.0882407	0	0.0242389	0.0232527
320	SSTP_0000644600	0	0.0172205	0	0	0.0186871	0	0.0221421	0	0	0	0	0	0	0	0	0.0940839	0.116838	0.15189	0	0.024437	0.0229867
321	SSTP_0000644700	0	0	0	0	0	0	0	0	0	0	0	0	0	0	0	0	0.0266003	0	0	0	0
322	SSTP_0000644800	0.0670852	0.107205	0.157674	0.0471417	0.0103831	0.0162618	0.0102889	0	0	0.0485058	0.0686282	0.00403796	0.0121107	0.0158918	0.0585789	0.213537	0.0178136	0.152265	0.310519	0.243956	0.457309
323	SSTP_0000647750	0	0	0	0	0	0.0541457	0.0653293	0.0815161	0.183611	0.0499543	0	0	0	0.0494448	0.0492638	0.117581	0.093587	0.0882325	0	0	0
324	SSTP_0000648700	0	0.0172462	0	0.0171451	0	0	0.440653	0.634031	0.631448	0	0	0	0.0255452	0	0	0	0	0	0	0	0
325	SSTP_0000648800	0.0168601	0	0.0360519	0.034293	0.0559276	0.0181145	0.066338	0.110683	0.222376	0	0	0	0	0	0	0.400958	0.117176	0.196596	0	0	0
326	SSTP_0000650400	0.0379132	0.0503304	0.0107024	0.0262514	0.0645023	0.0627329	0.00376454	0.0382141	0	0.00741586	0.00631338	0	0.0259754	0.0167369	0	0.237029	0.00118797	0.116909	0	0	0.00488796
327	SSTP_0000650500	0	0	0	0	0	0.0289826	0	0	0	0	0	0	0	0	0	0	0	0	0	0	0
328	SSTP_0000664500	0	0	0.221806	0	0	0.151962	0	0.0781924	0	0	0.0881441	0.183567	0.100968	0	0	0.209419	0.279776	0.193264	0.000261958	0	0
329	SSTP_0000664700	0.100513	0.0353849	0.109207	0	0.0180521	0.0178213	0.0215384	0	0	0.0167441	0	0	0	0.0167883	0.0168868	0	0.0238076	0	0.891982	0.647491	0.715871
330	SSTP_0000664800	0.0364724	0.0375082	0.00795025	0	0.0124415	0.046199	0	0	0.0375321	0.0442516	0	0	0	0	0	0	0	0	0	0	0.0172051
331	SSTP_0000665000	0	0.0173268	0	0	0.018088	0	0	0	0	0	0	0	0	0	0	0.422934	0.282364	0.312845	0.179536	0.144028	0.162745
332	SSTP_0000665450	0.0163291	0.0171963	0	0	0	0	0	0	0	0	0	0	0	0	0.0165359	0.0232419	0	0.0221009	0	0	0
333	SSTP_0000665500	0.0507331	0.0516838	0.0722514	0.0685921	0.112151	0.144434	0	0.19405	0.0739482	0.0336575	0.0165772	0	0	0.0328093	0	0.164745	0.163673	0.195453	0.0904133	0.293348	0.455428
334	SSTP_0000665600	0.0507712	0.0516961	0.036147	0.154371	0.130932	0.0902406	0.0221605	0.0277365	0.0369658	0.151496	0.0497636	0.0740352	0.0253231	0.0491966	0	0.235318	0.11689	0.238709	0.0903975	0.0733686	0.0459836
335	SSTP_0000665800	0	0	0	0	0	0	0	0	0	0	0	0	0	0	0	0	0	0	0	0	0
336	SSTP_0000666000	0	0.0174267	0.0360272	0.0170253	0.0364532	0.0181505	0.0436465	0.0271401	0.0365613	0	0	0	0	0	0	0.0474506	0.0474366	0.0673818	0	0.0725475	0.0469461
337	SSTP_0000666100	0	0.0172705	0	0	0.0180292	0	0	0.0536527	0	0	0	0	0	0	0.0166232	0.0468399	0	0.0222735	0	0	0.0695212
338	SSTP_0000666200	0	0	0.0362143	0	0.0185133	0	0.0442555	0	0	0	0	0	0	0	0	0	0.0238174	0	0	0.0979133	0
339	SSTP_0000666250	0	0	0	0	0	0	0.0217292	0	0	0	0	0	0	0.0164265	0	0	0	0.0219567	0	0	0
340	SSTP_0000666300	0.0337469	0.0344346	0	0.0514056	0.0186538	0.0361491	0.0221159	0.0830235	0	0.0504545	0.0330915	0.0184765	0.0253588	0.016424	0.0161858	0.0470929	0.0467883	0.0870778	0	0.0488297	0.184363
341	SSTP_0000666400	0.016932	0	0.0542324	0.342935	0.261959	0.666919	0	0.0277408	0	0	0	0	0	0.0163773	0.0161054	0.0705278	0.0467089	0.108292	0.0903044	0.342372	0.229544
342	SSTP_0000666450	0	0.0516434	0.017886	0.290153	0.147067	0.272006	0	0.0273618	0.0369458	0.0167474	0	0	0.0255193	0	0	0.0707841	0.0469818	0.13259	0.362812	0.36343	0.23278
343	SSTP_0000667000	0	0	0.123348	0	0.0186008	0.0180906	0.0661984	0.824243	0.851243	0	0	0	0	0	0.0162295	0.188417	0	0	0	0	0.0231838
344	SSTP_0000667110	0.016897	0.0516659	0.0180507	0.0171419	0.149422	0.198634	0	0.110815	0.0369755	0.0168229	0.0496952	0.0369806	0	0.0492243	0.016156	0.18828	0.046765	0.0869182	0.180835	0.0977317	0.207119
345	SSTP_0000668300	0.0169247	0.0517077	0.0361509	0.102937	0.149647	0.0902781	0.155145	0.1387	0.147919	0.084183	0.0331786	0.0740472	0.0506668	0.0492172	0.0322911	0.04708	0.0233863	0	0	0	0
346	SSTP_0000668400	0	0	0	0	0	0	0.21758	0.162448	0.109409	0	0.0163345	0.0542242	0	0.0332281	0.0166902	0.330209	0.188778	0.200996	0	0	0
347	SSTP_0000668500	0.016641	0.0174746	0.126446	0.221193	0.182319	0.235479	0.304904	0.840027	0.1093	0.0838423	0.0492944	0.0542717	0	0.0167395	0.0168119	0.284128	0.0711689	0.135204	0	0.0242056	0.117079
348	SSTP_0000674300	0	0	0	0.327814	0.272203	0.224617	0	0	0	0	0	0	0	0	0	0	0	0	0	0	0
349	SSTP_0000674600	0.134535	0.120546	0.0539727	0	0.0372114	0	0.0220736	0.02762	0.0370722	0.1177	0.0825314	0.129174	0.0763155	0.0329594	0.0976588	0.0707713	0.0703376	0.0218905	0	0	0
350	SSTP_0000679900	0	0	0	0.238232	0	0	0	0.306421	0.321305	0.167958	0.414465	0.126786	1.2734e-08	7.47487e-07	0	0.319576	0	0	0	0.130359	4.22683e-09
351	SSTP_0000686200	0	0	0	0.233462	0	0	0	0	0	0	0	0.235441	0	0	0	0	0	0	0	0	0
352	SSTP_0000687700	0	0.017227	0	0	0	0	0	0	0	0	0.0160318	0	0	0.0163719	0.0165478	0.0465478	0.0463443	0.0220877	0	0	0
353	SSTP_0000687800	0.0508092	0.0172365	0.090421	0	0	0	0.0221715	0	0	0.0180217	0.0247554	0.0555508	0.0253165	0.032788	0.0504522	0.0941188	0.0467504	0	0	0	0
354	SSTP_0000688600	0	0	0	0	0	0	0	0	0	0	0	0	0.0253281	0	0	0.0234869	0	0	0	0.0242579	0.0230631
355	SSTP_0000688850	0.0338816	0.0172325	0.018086	0.120074	0.149765	0.306491	0	0	0	0.0168334	0	0	0.0252975	0	0	0.0470319	0	0.19495	0.0903288	0.0489315	0.206625
356	SSTP_0000688900	0.0168058	0	0.0179789	0.085579	0.0185906	0.0181055	0	0.0275966	0.0370306	0.0167964	0	0	0	0.0329173	0	0.0471252	0.0234164	0.174834	0.181101	0.170542	0.115586
357	SSTP_0000689000	0	0	0	0.0855085	0.148842	0.12638	0.0441282	0.303698	0.0369446	0	0	0	0	0	0.0161767	0	0	0.0217577	0	0	0.0230264
358	SSTP_0000698800	0.405877	0.48246	0.21677	0.051452	0.0186928	0.0541791	0.0221517	0	0	0	0	0	0	0	0	0.117704	0	0.0217259	0.180875	0.317831	0.161088
359	SSTP_0000699000	0	0	0.0178419	0.0170078	0.0365217	0	0	0	0	0	0	0	0	0	0	0.0470798	0.0234779	0.0221359	0.0904388	0	0.0232959
360	SSTP_0000699300	0.0674375	0.155094	0.090131	0.0342973	0.0745688	0	0.0221125	0.0830091	0	0	0	0	0	0	0	0.0707755	0.0703243	0.10927	0.0906542	0.0244216	0.0462458
361	SSTP_0000699400	0.0504447	0.0344441	0.143909	0.0342631	0.0186039	0.0543959	0	0	0	0	0	0	0	0	0	0.0471859	0.0703418	0.218973	0.0906703	0.0243845	0
362	SSTP_0000699500	0	0	0	0	0	0.0180179	0	0	0	0	0	0	0	0	0	0.0234451	0.0466022	0.0435078	0	0.0242378	0.0230091
363	SSTP_0000699600	0	0.0171313	0	0.0170132	0	0	0	0	0	0	0	0	0	0	0	0	0.0233664	0.0439138	0	0.0483388	0.0462867
364	SSTP_0000699850	0.016555	0.0173851	0	0	0	0	0	0	0	0.0166641	0	0	0	0	0	0	0.0235831	0.0224158	0	0.024042	0
365	SSTP_0000699900	0.0508286	0.189551	0.144699	0.0686113	0.131058	0.0540753	0.0443452	0.0277552	0	0	0	0	0.0505844	0	0.032204	0.258635	0.140142	0.346459	0.090314	0.146798	0.160663
366	SSTP_0000700000	0.050868	0.0344656	0.0361945	0.0514627	0.11241	0.0360233	0	0	0	0	0	0	0.0252744	0	0.0321622	0.0940061	0.0933812	0.0648762	0.180534	0.0734224	0.0458566
367	SSTP_0000700100	0.0169285	0	0	0	0	0	0.0221584	0.0277361	0	0	0	0	0	0	0.0161074	0	0.0467085	0.0216612	0.090304	0	0
368	SSTP_0000700200	0	0	0.0360994	0	0	0	0	0.0276994	0	0	0	0	0.0252782	0.0163694	0.0161046	0.0234922	0	0.0866306	0	0.0244221	0.0229484
369	SSTP_0000700300	0.0169128	0	0.0180635	0	0	0.0180475	0	0	0	0	0	0.0185002	0	0.0163985	0	0.0235283	0.0233748	0	0.0903862	0	0
370	SSTP_0000700400	0	0	0	0	0	0.017997	0	0	0	0	0	0	0	0.0327042	0.0160836	0	0	0	0	0.146451	0.114606
371	SSTP_0000700600	0.100132	0	0.108191	0.0171172	0.0183055	0.0364337	0.0219208	0.0272795	0	0	0.0164271	0	0	0	0	0.0474594	0.0474083	0.0896025	0.273007	0.121201	0.047007
372	SSTP_0000700650	0.0167366	0.0171814	0.071705	0	0.0925538	0.0543514	0	0	0	0	0	0	0	0.0164741	0	0.0471432	0.0234218	0.0219282	0.0905666	0.0243033	0.0463245
373	SSTP_0000700700	0	0.0085982	0	0	0	0	0	0	0	0	0	0	0	0	0	0.023242	0.0115924	0.022101	0	0	0.0114025
374	SSTP_0000701000	0	0.00861342	0.00895745	0.00854985	0.00922629	0.018159	0.0109751	0.0137139	0	0.00839024	0	0.00917363	0	0.00828056	0.00822462	0.011816	0.0235169	0	0.0454241	0.0364298	0.058246
375	SSTP_0000701100	0	0	0	0.0512374	0	0	0	0	0	0	0	0	0	0	0.0161312	0.117342	0.139899	0.130175	0	0.073006	0.0689042
376	SSTP_0000701200	0	0.00861342	0.00895745	0.00854985	0.00922629	0.018159	0.0109751	0.0137139	0	0.00839024	0	0.00917363	0	0.00828056	0.00822462	0.011816	0.0235169	0	0.0454241	0.0364298	0.058246
377	SSTP_0000701500	0	0.0085982	0	0	0	0	0	0	0	0	0	0	0	0	0	0.023242	0.0115924	0.022101	0	0	0.0114025
378	SSTP_0000701600	0	0.0176066	0	0	0.110591	0	0	0	0	0	0	0	0	0	0	0	0	0	0	0.0733565	0
379	SSTP_0000701633	0	0.00859321	0	0.0256084	0	0.0241746	0.00730768	0	0.0184863	0.00837811	0	0	0	0.0165034	0	0	0	0	0.0679857	0.0363925	0.0609209
380	SSTP_0000701666	0.0506686	0.0344393	0.036089	0.565579	0.504098	0.505721	0	0	0	0	0	0	0	0	0	0.141222	0.0701549	0.0869576	0.0904275	0.0732805	0.023021
381	SSTP_0000702800	0.0673902	0.0688255	0.0720343	0.171236	0.0931323	0.108487	0.110452	0	0	0.201678	0.0165216	0	0.0253658	0.032861	0.0324058	0.141264	0.0467883	0.174335	0.0904737	0.024391	0.0461244
382	SSTP_0000703300	0.016686	0	0.0178825	0.272816	0.129151	0.34399	0	0	0	0	0	0	0	0.0329292	0.0163265	0.0235543	0.0233914	0.0219529	0.0905293	0.0242455	0.0463111
383	SSTP_0000703400	0.0166078	0.0172165	0	0.255116	0.365279	0.235117	0	0	0	0	0	0	0	0	0.0165083	0.023552	0	0.0221528	0	0	0
384	SSTP_0000703500	0	0	0	0.153858	0.0368258	0.108978	0	0	0	0	0	0	0	0	0	0.0472654	0	0	0	0.0485355	0.0233156
385	SSTP_0000703600	0.0168608	0	0	0.0338316	0.0363384	0.161432	0	0	0	0	0	0	0	0	0	0	0.023962	0.0227597	0.0897767	0.0241367	0
386	SSTP_0000703700	0	0.0171569	0	0	0.0185578	0.0541192	0	0	0	0	0	0	0	0	0	0.046979	0.0233399	0.130564	0	0	0.0690729
387	SSTP_0000703800	0	0.0344041	0	0.0513665	0	0.0540861	0.0221154	0	0.0369213	0	0.0165512	0	0	0.0327631	0.0161267	0.164507	0.140089	0.108439	0	0.0244082	0.114863
388	SSTP_0000703900	0	0.0173937	0.0180112	0.119581	0.0548567	0.0181849	0	0.0272337	0.0367869	0.0334862	0.0492108	0	0	0	0	0.0236964	0	0.0895994	0.0908082	0.0968136	0.0469298
389	SSTP_0000703950	0	0	0.0178989	0	0	0.0180799	0	0	0	0	0	0	0	0	0	0	0.0467618	0.0218797	0.0904082	0.0242684	0
390	SSTP_0000704000	0	0	0.0179474	0	0	0	0	0	0	0	0	0	0	0.016377	0	0.0234663	0.0233171	0.130332	0.0901715	0	0.0229876
391	SSTP_0000704100	0.0334202	0.120866	0.0538031	0.102695	0.0737276	0.0545678	0	0.0274382	0	0.016792	0	0	0	0	0	0.118341	0.117789	0.11084	0	0.0971504	0.163476
392	SSTP_0000704200	0.0503967	0.103249	0.0179723	0.32521	0.130107	0.144936	0.0220516	0	0	0	0.0164905	0.0184377	0	0.0164681	0.0162706	0.282896	0.117147	0.153188	0.181203	0.0730902	0.115714
393	SSTP_0000704300	0	0.0172437	0	0	0.0361142	0.0179982	0	0	0	0	0	0	0	0.033045	0	0.0938911	0.0469726	0.0222323	0	0.0479578	0.0697283
394	SSTP_0000704400	0	0	0	0.137027	0.275915	0.236922	0.0659395	0.0821244	0.184943	0.184762	0.0657636	0.0732819	0	0	0	0.0237369	0	0.0223278	0	0.0243108	0.0234953
395	SSTP_0000704500	0.152216	0.155033	0.25289	0.291484	0.0934664	0.180475	0.0442988	0.0831658	0.0369621	0.117788	0.149204	0.0555008	0.0759652	0.0491953	0.0645587	0.117641	0.0701246	0.13023	0.0903861	0.122225	0.0919745
396	SSTP_0000704700	0	0.0346611	0	0.0171009	0	0	0	0	0	0	0	0.0182881	0	0	0	0	0.0236427	0	0	0	0
397	SSTP_0000704833	0.0167339	0.0345058	0.035906	0.0513893	0.0555031	0.0545703	0.0219943	0.0550008	0	0.0840599	0.0166703	0.0367769	0.0766928	0.0994542	0.115185	0.0473495	0	0.0442256	0	0.0973412	0
398	SSTP_0000704866	0.0332327	0.034741	0.017989	0.102711	0.018255	0.0544931	0.0436699	0	0	0.0668898	0.0327751	0.0544521	0.0772493	0.0998599	0.083562	0.0709773	0	0	0.0905491	0	0.0234446
399	SSTP_0000704900	0.0168114	0.0516821	0.0359736	0.154206	0.186008	0.235835	0	0.055234	0	0.033628	0	0.0369094	0	0.0494786	0	0	0.046918	0.109614	0	0.0731575	0.0695319
400	SSTP_0000705000	0	0	0.0357284	0.25575	0.147257	0.307753	0	0	0	0.033464	0	0	0	0.0330073	0	0.0471362	0.0234301	0.0440347	0.0905618	0.072668	0.116037
401	SSTP_0000705100	0	0.0516186	0	0.0342506	0.0373089	0.0360979	0.0221111	0.13835	0.0369524	0	0	0	0.0506448	0.0164004	0	0.0940797	0.140208	0.217257	0	0.0976282	0.138034
402	SSTP_0000705133	0.0168123	0.0172099	0	0.0171234	0.0557939	0.0905694	0.0441276	0.055214	0	0.302469	0.280485	0.184454	0	0.0329343	0.0162595	0.188583	0.07028	0.284265	0.18119	0.0243735	0.161908
403	SSTP_0000705166	0	0.0343971	0	0.340242	0.0548279	0.07236	0	0	0	0.216831	0.146829	0.0727818	0.0510328	0.0330711	0.0164825	0.117779	0.117368	0.0885052	0	0.0483024	0.162884
404	SSTP_0000705200	0	0.0178339	0	0.339431	0.109317	0.306424	0.500367	0.565929	0.325229	0.033714	0.0331219	0.0179278	0	0.0169241	0	0	0.0239537	0.0912547	0.0900773	0.024245	0.0232992
405	SSTP_0000706000	0.166169	0.174558	0.23461	0.220932	0.45501	0.343864	0.0652374	0.0811639	0.0363668	0.0334992	0.0492597	0.0180548	0.18134	0.0668805	0.0335859	0.21287	0.0947641	0.202522	0	0.145002	0.0701555
406	SSTP_0000706900	0	0.0174344	0.0179344	0	0	0	0	0	0	0	0	0	0	0	0	0	0	0	0	0	0
407	SSTP_0000707000	0.235589	0.189408	0.269989	0	0.0558343	0.0181186	0.02208	0	0	0	0	0	0	0	0	0.141484	0.117175	0.10933	0	0.0731672	0.0925221
408	SSTP_0000707100	0.201234	0.39643	0.628932	0	0.0185445	0.0181819	0	0	0	0	0.0164665	0	0	0.0165317	0	0	0.023496	0	0.0909347	0.0243651	0.069771
409	SSTP_0000707250	0.0167815	0	0.018269	0.0509317	0.0182211	0.0180078	0	0	0	0.0504997	0.0329467	0.017923	0	0	0	0.0478296	0.0476205	0.0680879	0	0.0241635	0.069952
410	SSTP_0000707300	0	0.034578	0.0358415	0.17025	0.0546753	0.199383	0	0.0271421	0	0.116807	0.0326601	0.0363436	0.0256087	0.0165796	0.0166236	0.165129	0.0942022	0.0667768	0.0904728	0.144747	0.0701502
411	SSTP_0000707333	0	0.00859321	0	0.0256084	0	0.0241746	0.00730768	0	0.0184863	0.00837811	0	0	0	0.0165034	0	0	0	0	0.0679857	0.0363925	0.0609209
412	SSTP_0000707366	0.016894	0.0344451	0.0180487	0.10285	0.0933745	0.0541876	0.022135	0	0.0369818	0.0168234	0	0	0	0	0	0.30601	0.116936	0.217391	0	0	0.0920858
413	SSTP_0000707400	0	0	0	0.47873	0.4828	0.416074	0	0	0	0	0	0	0	0	0	0.094159	0	0.0218401	0.0904684	0.0243373	0
414	SSTP_0000707500	0.0168971	0	0.0360974	0.171359	0.242798	0.144353	0.0442654	0.1385	0	0	0	0	0.0506333	0.0655823	0.0322822	0.235206	0.0934709	0.303899	0.0903594	0.19542	0.160948
415	SSTP_0000707700	0.133695	0.103507	0.179265	0.273798	0.147562	0.181774	0.0878482	0.219552	0.296404	0	0	0	0	0	0	0.118246	0.0942113	0.110684	0.0909416	0.0971864	0.0233317
416	SSTP_0000707800	0.382769	0.291318	0.107076	0	0	0	0	0	0	0	0	0	0	0.0164553	0.0163252	0.0705924	0.163575	0.175616	0.0903837	0.120955	0.0925613
417	SSTP_0000708500	0.0167703	0	0.247669	0	0	0	0	0.0275545	0.0371412	0	0.0164645	0	0	0	0	0.0473624	0.0117581	0	0.091009	0.0324952	0.0698374
418	SSTP_0000714350	0	0.0343119	0.0356385	0	0	0	0	0	0	0	0	0.018228	0.0508878	0	0.0164049	0.0705589	0.0468082	0.110239	0	0.0241404	0
419	SSTP_0000718450	0	0.0174073	0.0179764	0.254435	0.236236	0.307101	0.260359	0	0.0726233	0.501479	0.327367	0.28868	0.180861	0.150128	0.150794	0.0708164	0	0.0448999	0	0.0241161	0.0233573
420	SSTP_0000727800	0.118505	0.103375	0.162689	0.102899	0.0748371	0.0180354	0	0.0277401	0.147774	0	0.0331832	0.0185091	0.0253058	0	0.0483577	0.540953	0.140192	0.195095	0.0903474	0.0733698	0.0918842
421	SSTP_0000732800	0	0.0344364	0	0.274211	0.149416	0.180495	0.110671	0.0554026	0.258737	0	0	0.0369774	0	0.0328011	0	0.0941051	0.0233735	0.108581	0	0.0244295	0.0230009
422	SSTP_0000734900	0.152111	0.120572	0.288873	0.0171444	0.0373641	0.0180584	0.066423	0.110838	0.0739554	0.0673015	0.0497065	0.0184938	0.228026	0.0328173	0.0807812	0.188294	0.257226	0.152101	0	0.146625	0.184106
423	SSTP_0000736650	0.0665887	0.069127	0.0896044	0.119287	0.0732153	0.0907239	0.0218725	0.081695	0.147274	0.0167086	0	0	0	0.0165993	0.0166009	0.519739	0.18859	0.466844	0	0.145144	0.327519
424	SSTP_0000737200	0.0677103	0.0344548	0.0542241	0.0685922	0.0561221	0.0901665	0.0443197	0.0554745	0.0369393	0.0673136	0	0	0.101212	0.0163851	0	0.0940685	0.0934508	0.0216747	0.0903372	0	0.0229683
425	SSTP_0000738200	0	0	0	0.0171582	0	0	0.0664586	0.221771	0.333229	0.0168397	0	0	0	0	0	0	0.0234129	0	0	0	0
426	SSTP_0000738900	0.101357	0	0.0738739	0	0	0	0.241471	0	0	0	0	0	0.0899006	0	0	0	0.0354779	0	0.0393973	0	0
427	SSTP_0000742200	0.0205548	2.33384e-09	0	0	0	0	0	0	0	0	0	0	0	0	0	0	0	0	0	0	0
428	SSTP_0000742300	0.0168539	0	0	0.355086	0.163455	0.0896473	0.130015	0.0536728	0.0720618	0.0168458	0	0	0.0524076	0	0	0.0240197	0.0239522	0.0227504	0.0897398	0	0.0232329
429	SSTP_0000762800	0	0.0344171	0.0180037	0.188373	0.055859	0.0361834	0.0220852	0.0276364	0.111043	0.201702	0.148653	0.018456	0.076144	0.0657653	0.0810973	0.259108	0	0.130887	0	0.0243895	0.0230829
430	SSTP_0000763350	0	0.0184878	0	0.0521154	0.0591897	0.0529494	0	0	0.0322114	0.0344826	0	0.036371	0	0	0	0	0.0227267	0.0236373	0	0	0.044187
431	SSTP_0000786800	0.0168155	0	0.0539688	0	0.0372095	0.0725296	0.0220726	0	0	0	0.0165064	0	0.0254416	0.0164828	0	0.165175	0.0703525	0.175209	0	0.0731589	0
432	SSTP_0000809100	0.0335364	0.0870911	0.126349	0.0515108	0.0368718	0.0182853	0	0.0274341	0	0	0	0.0183504	0	0	0	0	0	0	0.583959	0.652532	0.565553
433	SSTP_0000821800	0.19477	0.096011	0.223816	0.0974551	0.111582	0.0170462	0.0205935	0.0268478	0.0336964	0.0169312	0	0	0	0	0.016933	0.153958	0.126273	0.167064	0.248162	0.0237429	0.022093
434	SSTP_0000826950	0.066578	0.136079	0.0211804	0.320988	0.233158	0.167299	0.0865945	0	0.036086	0.167329	0.196188	0.107107	0.059485	0.183858	0.101005	0.025044	0.0473179	0.143627	0	0	0.0296599
435	SSTP_0000827000	0	0	0	0	0	0	0	0	0	0	0	0	0	0	0	0	0	0	0	0	0
436	SSTP_0000827600	0.01695	0.034463	0	0.0857635	0.0561877	0.0727882	0	0	0.0369121	0	0	0	0	0	0	0.0705132	0.0233486	0.0249846	0.54168	0.223353	0.137617
437	SSTP_0000827625	0.0336873	0.0688422	0.0180068	0.119892	0.0744926	0.0904605	0.0220887	0	0	0.0168104	0	0	0	0	0.0162188	0.0235566	0.023406	0.0218137	0	0.121965	0.184661
438	SSTP_0000828000	0	0	0	0	0.0184265	0.0183345	0	0	0	0	0	0	0	0	0	0	0	0	0	0	0
439	SSTP_0000829000	0.133461	0.675542	0.427854	0.0199699	0	0.0196076	0	0	0.0392799	0	0	0	0	0.0164267	0.0162113	0.263645	0.055152	0.0549333	0	0.0492917	0
440	SSTP_0000829100	0	0	0.0179009	0.0511725	0.018483	0.0361858	0.021936	0	0.0369602	0.0167439	0	0	0.0507899	0.032906	0.0325789	0.094152	0.0467816	0.0657122	0	0	0
441	SSTP_0000829800	0.0166591	0.0259993	0.0179571	0.0426943	0.0182989	0.0363506	0.174977	0.258848	0.349731	0	0.0245849	0.0273618	0.0256771	0	0.0083247	0.023662	0.0236328	0.0111503	0	0.084758	0.0117216
442	SSTP_0000832700	0	0	0.183994	0	0	0	0	0	0	0	0	0	0	0	0	0.00967615	0	0	0	0	0
443	SSTP_0000833100	0.0853088	0.0689002	0.0180655	0	0.0934805	0.0411405	0	0	0	0.0842519	0.0431069	0.0555028	0.0506284	0.0715683	0.039787	0.106315	0	0.050763	0	0.0522133	0.179143
444	SSTP_0000833200	0.0667679	0	0	0	0	0.0850888	0	0	0	0.134261	0.0231609	0	0.0252942	0.0267715	0.105382	0.152276	0.046691	0.0793954	0.180548	0.143069	0.165553
445	SSTP_0000833710	0.0530611	0.0761214	0.108442	0.0857409	0.0561177	0.0581367	0.0221589	0	0	0	0.0199621	0	0	0.0674224	0.0322417	0.202708	0.0893428	0.229181	0.629779	0.547321	0.479032
446	SSTP_0000833720	0.0169232	0.0344517	0.0361422	0.102878	0.149625	0.126245	0	0	0	0.0168269	0.0497589	0.0370088	0.025305	0.0983206	0.0483627	0.141107	0.140182	0.238474	0.725252	0.587547	0.414313
447	SSTP_0000837200	0.0167365	0	0	0.154231	0.183895	0.25545	0.0659136	0.19161	0.110942	0.0168005	0	0	0	0	0	0	0.0474166	0.0447353	0	0	0
448	SSTP_0000837300	0.0334711	0	0.0179481	0.599204	0.647857	0.381831	0.15389	0.357517	0.185377	0.0336075	0	0.0183941	0	0.033108	0	0.165702	0.0470179	0.0662628	0	0.024328	0.0232779
449	SSTP_0000841250	0	0.0175314	0.0180751	0	0	0.0179107	0	0	0	0	0	0	0	0	0	0	0	0	0	0.0719281	0.0463951
450	SSTP_0000841300	0	0	0	0	0.0182594	0	0	0	0	0	0	0	0	0	0	0.0237358	0.047499	0	0	0	0
451	SSTP_0000841400	0.0675929	0.0344436	0.036103	0.0171417	0.0186789	0.0361116	0	0	0	0	0	0	0	0	0	0.117666	0.0467614	0.0651776	0.452051	0.1466	0.184081
452	SSTP_0000841600	0.480479	0.172342	0.213594	0.0343109	0.037469	0.0721735	0	0	0.0369125	0.0336703	0.0166128	0	0.0758385	0	0.016086	0.282065	0.0233493	0.173056	0.270848	0.0978996	0.174561
453	SSTP_0000841700	0.0168617	0.0172328	0.0360559	0	0	0	0.0221152	0	0	0	0	0	0	0	0	0	0	0.0218488	0	0.0732689	0.0462367
454	SSTP_0000841800	0.0337818	0.034437	0.0541352	0.0342753	0.0373428	0.0180572	0.0885217	0	0	0.0168195	0	0	0	0	0.0161575	0.0941313	0.0467613	0.304244	0.180821	0.0977061	0.115071
455	SSTP_0000841900	0.016659	0	0	0.0341111	0	0	0	0	0	0	0	0	0	0	0	0.023571	0	0.0881214	0	0.0484515	0.0232193
456	SSTP_0000842000	0	0.0172491	0	0.0170985	0.0184132	0	0	0.0274104	0	0	0	0	0	0.0165698	0	0	0.0235339	0	0.181771	0.0727888	0.0466601
457	SSTP_0000842100	0	0	0	0	0	0	0	0	0	0	0	0	0	0	0	0	0.0233347	0	0	0	0
458	SSTP_0000842200	0	0.0172113	0	0	0	0.0180176	0	0.0277104	0	0	0	0	0.0252808	0	0	0	0.023342	0.0649705	0	0.195445	0.0917959
459	SSTP_0000842300	0	0.0171753	0	0	0.0185595	0	0	0	0	0	0	0	0	0	0	0.0941056	0.0233805	0.0218249	0	0.0243238	0.0461704
460	SSTP_0000842400	0.0166743	0	0.0179027	0.0341642	0.0919364	0.0544601	0.0219222	0.02738	0.0739517	0.0167672	0	0	0	0	0.0164783	0.0708908	0.0470202	0.110759	0.0908696	0.193964	0.0466527
461	SSTP_0000842500	0	0	0.0572564	0	0	0	0	0	0	0.057558	0	0.0523087	0	0	0	0	0	0	0	0	0.0844991
462	SSTP_0000842700	0.0169484	0	0	0.034424	0.0184658	0	0.0220761	0	0	0.136504	0.099918	0.0546491	0	0	0	0.0966487	0	0	0	0.0245112	0
463	SSTP_0000842900	0.0333458	0.0874719	0.0180559	0	0.0365958	0.018222	0.0219234	0.0272427	0	0.285678	0.29644	0.163705	0	0.0334995	0	0.237941	0.190387	0.18026	0	0.0242835	0
464	SSTP_0000843000	0.0334279	0.0175947	0.0181589	0	0	0	0.0436589	0	0	0.0841818	0.0329875	0.0180712	0	0	0	0.0237989	0.0238223	0	0.0905678	0.0242316	0.0234283
465	SSTP_0000843100	0.101625	0.068917	0.144661	0.0686004	0	0.0540765	0.110837	0	0	0.235624	0.331962	0.0925619	0.0252927	0.0163778	0.0483131	0.0940458	0.116782	0.086628	0.0903117	0.122305	0.160678
466	SSTP_0000843200	0.0676179	0.137823	0.162523	0.0171477	0.0747428	0.0541856	0.132871	0.027715	0	0.100972	0.281725	0.0739894	0	0.0492355	0.0161594	0.329579	0.257276	0.282528	0.180882	0.122211	0.0920707
467	SSTP_0000843300	0	0	0	0.0169306	0	0.0180034	0	0	0	0	0	0	0	0	0	0	0.0467225	0.0660611	0	0.0721066	0.115789
468	SSTP_0000843350	0.0331431	0.0173236	0.0179405	0.272111	0.163852	0.199269	0	0	0	0	0	0	0	0.0165984	0	0	0.0236046	0.0892974	0.0903049	0.0722909	0.0233814
469	SSTP_0000843600	0	0.0342848	0	0	0	0.0178244	0	0	0.0358582	0	0	0	0.0254536	0.0164416	0.0165252	0	0.023303	0.0221183	0	0.0237931	0.0230652
470	SSTP_0000844300	0	0.0343767	0.0179431	0	0.0185531	0	0	0	0	0	0	0	0	0	0	0.023554	0.0234083	0.0875074	0.0905166	0.0973086	0.0462581
471	SSTP_0000844350	0.0333434	0.0172916	0.0537851	0	0.0183306	0	0	0	0	0	0.0163879	0	0	0	0.0331662	0.0236528	0.0235824	0	0.090835	0.096947	0.0234072
472	SSTP_0000844400	0	0	0.0179589	0.0171138	0	0	0	0	0	0	0	0.0184221	0	0	0	0.023593	0.023442	0	0.181306	0.0243481	0.115884
473	SSTP_0000844500	0.0168909	0.0688667	0.144356	0.0171365	0.0186712	0.0361063	0	0	0	0	0	0	0.0759863	0	0	0.188228	0.0701287	0.152075	0.0903932	0.0976998	0.11504
474	SSTP_0000844600	0.0506689	0.0860753	0.144344	0.0171349	0.0373394	0.0541534	0.0663822	0.0276922	0	0	0	0	0.0759777	0.0164021	0.0161505	0.188209	0.0934949	0.173778	0.632685	0.586148	0.52912
475	SSTP_0000844700	0	0.0344479	0.198783	0.0171446	0.0561112	0.0540886	0	0	0.0369317	0	0.0165867	0	0	0.0163817	0	0.0705367	0.0233578	0.02167	0.451592	0.513435	0.436305
476	SSTP_0000844800	0.0167662	0.0344626	0	0	0.0185407	0.0363549	0	0	0	0	0	0	0	0	0	0	0	0	0.272716	0.0730823	0.116232
477	SSTP_0000844900	0.0169006	0.0344358	0.072208	0.0171379	0	0	0	0	0.0369535	0	0	0	0	0	0	0.14113	0.186949	0.195349	0.0903626	0.122156	0.0919673
478	SSTP_0000845000	0	0.0172326	0.072405	0	0	0.0544745	0	0	0	0	0	0	0	0	0	0.0469907	0.0233386	0.0885451	0.0918924	0.0494178	0.0925376
479	SSTP_0000845100	0.017543	0	0.021033	0.0179412	0.0572352	0	0.0225134	0	0	0.0170348	0.0168245	0.0196285	0.0515557	0.0331133	0.0695311	0	0	0.021869	0.0918794	0.0773886	0.0707917
480	SSTP_0000845200	0.0166923	0	0.0537053	0.0683034	0.110774	0.108813	0.0438551	0.0274302	0.0369795	0	0	0	0	0.0495336	0.0163803	0.141663	0.187585	0.242336	0.272014	0.194121	0.232178
481	SSTP_0000845300	0.133783	0.10334	0.125542	0	0.0739848	0.054506	0.0219676	0.164882	0	0.016791	0	0	0.0255122	0	0	0.165575	0.117455	0.331062	0.0908374	0.218785	0.302383
482	SSTP_0000845400	0	0.0801916	0	9.51284e-06	0.000182611	0	0	0	0	0.0718117	0	0	0	0.0678862	0	0	0	0	0	0	0
483	SSTP_0000845600	0	0	0.192857	0.128005	0.168669	0	0.0866598	0	0	0.145556	0.0615377	0.107587	0	0	0	0	0	0	0	0	0
484	SSTP_0000856800	0	0	0	0	0	0	0	0	0	0	0	0	0	0	0	0	0	0	0	0	0
485	SSTP_0000861500	0.0602917	0	0.0621612	0.0506104	0.179478	0.106264	0.219464	0.16201	0.10389	0.145427	0	0.173518	0.088053	0.056631	0.0507774	0.0822725	0.0648943	0.0765571	0	0.0783009	0
486	SSTP_0000861600	0.135822	0.256504	0.207532	0.105157	0.145652	0.193017	0.117524	0.14041	0.117652	0.0179172	0.0548539	0.0381656	0.0916582	0.0553729	0.0409699	0.210703	0.156995	0.192066	0.0901909	0.0257715	0.0248734
487	SSTP_0000866200	0	0	0	0	0	0	0	0	0	0	0	0	0	0	0	0	0	0	0	0	0
488	SSTP_0000867500	0	0.0171902	0	0	0.0185779	0	0	0.0275777	0	0	0	0	0	0	0	0.085884	0.0233997	0.0218383	0.0904856	0.0973853	0.0693015
489	SSTP_0000867600	0	0	0	0	0.0368781	0	0	0.0274047	0	0	0	0	0	0.0164768	0	0.0471212	0.0234023	0.0439547	0	0.0242372	0.0231739
490	SSTP_0000867700	0.0165593	0	0.0179472	0	0.0725702	0	0	0	0	0	0	0	0	0	0	0.0235672	0.0472028	0.0224135	0	0	0.0233195
491	SSTP_0000867800	0.016506	0.034853	0.591381	0	0	0	0	0	0	0	0	0	0	0	0	0.0704522	0.0467922	0.0668262	0	0	0.0456338
492	SSTP_0000867900	0	0	0	0.0497879	0.12803	0.0884195	0	0.0271484	0	0.0205854	0	0	0	0	0.00848132	0.0364992	0.00882391	0.0823222	0	0	0
493	SSTP_0000868300	0.0507326	0.017228	0.0722511	0.0342961	0	0.036109	0.0221494	0	0	0.0336576	0.016577	0	0.0253314	0	0	0.0706056	0.0701463	0.0434353	0	0.0488914	0.0690145
494	SSTP_0000868500	0.0335906	0.0172012	0.143746	0	0	0	0.0220472	0	0.0370304	0.016795	0	0.0368632	0.0695911	0	0	0.858931	0.281017	0.852891	0	0	0.0462591
495	SSTP_0000878050	0	0.0172497	0	0.0511653	0.0549299	0.0906424	0.109392	0.0545118	0.0368447	0.0668654	0.0490856	0.0547067	0.0255681	0.0165796	0.0495783	0.0472172	0.0235326	0.022184	0	0.024219	0.0466761
496	SSTP_0000884000	0.175064	0.23886	0.0772498	0.325493	0.423666	0.220363	0.0213049	0	0	0	0.014902	0.021161	0.120759	0.0779168	0.0489721	0.0925343	0.0746136	0.0943585	0.2338	0	0.119454
497	SSTP_0000896950	0	0	0	0	0	0	0	0	0.0330095	0	0	0	0	0.0169695	0	0.0253231	0	0	0	0	0
498	SSTP_0000908600	0	0	0.0358931	0.0171161	0.0184244	0.0545729	0.0878403	0.0823095	0.0741197	0	0.0164191	0.0183449	0	0	0	0.331628	0.141386	0.421701	0	0	0.0233748
499	SSTP_0000918200	0	0.0346082	0.0179317	0	0.0732607	0.0181656	0	0	0	0.0334513	0.0491432	0.0182302	0	0	0	0.0472882	0.0943978	0.0668022	0.544068	0.217894	0.374566
500	SSTP_0000924650	0	0.0516581	0.0360818	0.0856884	0.0373315	0	0.37614	0.221497	0.369868	0.117742	0.0662199	0.0369652	0.0760405	0.0820822	0.032342	0.117705	0.0467764	0.130501	0	0.12212	0.0230299
501	SSTP_0000933800	0	0.000149269	0	0	0	0	0	0	0	0	0.00740654	0	0	0	0	0	0	0	0.161364	0.0717224	0
502	SSTP_0000938100	0.0168887	0	0	0.171345	0.186688	0.0722111	0.376157	0.609209	0.628398	0	0	0	0	0	0	0.0470551	0.0233753	0.0434508	0.0903897	0	0.0690239
503	SSTP_0000943400	0	0	0	0.0338247	0	0.0179566	0	0	0	0	0	0	0	0	0.0162711	0	0.0232591	0	0	0	0.0460806
504	SSTP_0000943500	0	0	0	0	0	0	0	0	0	0	0	0	0	0	0	0	0	0	0	0	0
505	SSTP_0000943525	0	0	0	0	0	0	0	0	0	0	0	0	0	0	0	0.0233445	0	0	0	0	0.0230375
506	SSTP_0000943700	0.147959	0.0873923	0.106753	0.100357	0.100989	0.0720658	0	0.045515	0.0528312	0.0754607	0	0.019768	0.128533	0.0855306	0.147994	0.363286	0.116344	0.475672	0	0.0430029	0.0549932
507	SSTP_0000944000	0	0	0	0	0	0	0	1.90122e-06	0	0	0	5.50592e-07	0.0739625	1.63591e-06	0	0	0	0	0	0.113862	0
508	SSTP_0000944100	0.0166172	0.0171499	0	0.0170233	0.0183702	0.0542339	0	0	0.0368542	0	0	0	0	0.0164872	0.0163758	0.047053	0.0234119	0.0220048	0.361769	0.217603	0.324721
509	SSTP_0000944300	0.0501323	0.0173586	0	0	0	0	0	0	0	0	0	0	0	0.0166696	0	0	0	0	0	0.0242865	0
510	SSTP_0000946800	0.0169622	0.0517032	0.0362044	0.0514677	0.0562233	0.180078	0	0	0.0369	0	0	0	0	0.0654445	0.0160743	0.0939962	0.0700275	0.0864647	0.722042	0.171352	0.320891
511	SSTP_0000946900	0.0335763	0.034408	0.0359246	0.0171104	0.0185743	0.0181179	0.0440704	0	0.0370459	0	0.0164817	0	0	0	0.016277	0.117872	0.0234284	0.0437921	0.181206	0.0730599	0.162023
512	SSTP_0000947000	0	0	0	0	0	0.0180087	0	0	0	0	0	0	0	0	0	0.0234342	0	0.0435612	0	0.0725525	0.0690626
513	SSTP_0000947100	0	0.0171229	0	0.0170219	0	0.0541965	0	0	0	0	0	0	0	0	0	0.0234946	0.0233461	0.0218898	0	0.0242124	0.0461994
514	SSTP_0000947200	0	0.0172145	0.0722083	0.0514041	0.0186816	0.108207	0	0.0277043	0	0	0	0	0	0.0163866	0.0322549	0.141071	0.116792	0.108443	0	0.122145	0.0919066
515	SSTP_0000947300	0	0.014999	0.0179241	0	0.0134246	0	0.0219345	0	0	0	0	0	0	0.0166001	0	0	0.0471083	0.0348745	0	0.0210366	0
516	SSTP_0000947400	0	0	0.0180369	0	0	0.0360401	0	0	0	0	0	0	0	0	0	0.0234927	0.116698	0.108358	0.270748	0.0976346	0.0918339
517	SSTP_0000948300	0	0.0172059	0	0.80488	0.559757	0.703671	0.0221147	0.0276761	0.184722	0	0	0	0	0	0.016144	0.164603	0.0700875	0.151994	0.0903401	0.0244091	0.0229954
518	SSTP_0000949000	0	0	0.0180455	0.376971	0.690895	0.559463	0.0221296	0.110782	0.0739144	0.0672646	0.149045	0.0739399	0.0759619	0.0491953	0.0484364	0.141136	0.0233701	0.151999	0	0	0.0919933
519	SSTP_0000949300	0.0335039	0.0344788	0.0179598	0	0.0185221	0	1.14383	0.0550563	0	0.0168062	0	0	0.0765955	0.0331019	0	0.0473333	0.0470152	0.0662286	0	0	0
520	SSTP_0000955610	0.0337481	0.0516668	0.0360682	0.1714	0.130586	0.198933	0.088478	0.0276781	0.0370151	0	0.0165464	0	0	0	0.0323962	0.0706687	0	0.0653585	0.18103	0.122098	0.161425
521	SSTP_0000963700	0	0	0	0.0343101	0.0934583	0.0180724	0.0221534	0.166348	0.296043	0.0168359	0.0165775	0.0185045	0	0	0	0	0.0234013	0.0217478	0	0	0
522	SSTP_0000973700	0	0	0	0	0.0145718	0	0	0	0	0	0	0	0	0	0	0	0	0	0	0	0
523	SSTP_0000984900	0	0.0174082	0	0	0	0	0.0647943	0	0.108262	0.0333158	0.0163189	0	0.0257833	0	0	0.0941864	0	0.0223899	0	0	0.04636
524	SSTP_0000986000	0	0	0.0179266	0	0	0	0.0439372	0	0	0	0	0	0	0.0164744	0	0.188576	0.0936885	0.1535	0	0.0243037	0
525	SSTP_0000986100	0	0	0	0	0	0	0	0	0	0	0	0	0	0	0	0.0234932	0	0	0	0	0
526	SSTP_0000986200	0	0	0.0717171	0.024328	0	0	0	0	0.0369641	0.020036	0	0.0208162	0	0.0207708	0	0.0271473	0.135039	0.0935228	0	0	0.0373649
527	SSTP_0000986300	0.0169624	0.0517045	0.0181024	0.102938	0.0562242	0.0360173	0	0	0	0	0	0	0	0.0163619	0.0160752	0.0705001	0.0700302	0.172939	0.270776	0.171355	0.137532
528	SSTP_0000986400	0	0	0	0.051261	0.111475	0.0180494	0	0	0	0	0	0	0.0253221	0	0	0.070503	0.0233508	0.152336	0.0903073	0.0243354	0.0921125
529	SSTP_0000986500	0.0507598	0.137831	0.108418	0.0171493	0.0561013	0.108274	0.0221558	0.0554615	0	0	0	0	0	0.0163966	0.016135	0.117641	0.0467488	0.108493	0.0903838	0.0244513	0
530	SSTP_0000986600	0.10085	0.309548	0.143825	0.0684427	0	0.0361893	0	0	0	0	0	0.0184334	0	0	0.0162386	0.02355	0.0702133	0	0	0	0.0230993
531	SSTP_0000986800	0	0.0343552	0	0.0170979	0	0.0180037	0	0	0	0	0	0	0	0.0163588	0.0161047	0.023468	0.0699464	0.0433162	0.0901573	0	0.022941
532	SSTP_0000986900	0.0164758	0.0173517	0.0178907	0	0	0	0	0	0	0	0	0	0	0	0	0	0	0.0222831	0	0	0.0230371
533	SSTP_0000987100	0.107248	0.107191	0.169082	0.0880343	0.0190272	0.161029	0	0	0	0	0.0163733	0.0285945	0.0800612	0.168094	0.122374	0.122142	0.0782709	0.113834	0.49943	0.12605	0.124027
534	SSTP_0000987200	0.388075	0.361494	0.270456	0.0513962	0.0186527	0.0361359	0	0	0	0	0	0	0	0.016418	0	0.0941573	0.0233869	0.0217589	0	0.0976467	0.230355
535	SSTP_0000987600	0	0	0	0	0	0	0	0	0	0	0	0	0	0	0	0	0	0	0	0	0
536	SSTP_0000989900	0	0	0.0181302	0	0	0	0	0	0	0	0	0	0	0	0	0	0	0	0	0	0
537	SSTP_0000992200	0	0	0	0.0514253	0.0185277	0	0	0	0.0371172	0	0.0164591	0.0184128	0	0	0	0.0474028	0	0	0	0	0.0233134
538	SSTP_0000992300	0	0	0.0358975	0.102635	0.0741297	0.127036	0.0439919	0.110099	0	0.0167934	0	0.0184003	0	0.0165041	0	0.141633	0.0469163	0.263725	0.0907303	0.0243384	0.0232049
539	SSTP_0000992400	0.0338135	0.0861275	0.0722358	0.034291	0.0186874	0	0.0221452	0	0.0369726	0.0673054	0.0331467	0.0554927	0.0506606	0.0492133	0.0484489	0.400069	0.140283	0.30406	0	0.0488825	0.0230049
540	SSTP_0000992500	0.0501321	0	0.0358568	0	0	0.0909058	0.219598	0.384161	0.703975	0.117532	0.114862	0.0183462	0.102345	0.0828622	0	0.0472987	0.0235527	0.0221487	0.0909298	0.0242939	0
541	SSTP_0000992600	0	0.0344411	0.108278	0.0342793	0.0560175	0.126427	0.199191	0.110787	0.184891	0.185036	0.132485	0.0924361	0.152036	0.114878	0.0969705	0.0706109	0.116924	0.0869496	0.180853	0.0977154	0
542	SSTP_0000992700	0	0.0345636	0.0179183	0.0682532	0.0916015	0.0726153	0.0656911	0.0272676	0.0368441	0.0334635	0.0163786	0.0547482	0.0512097	0	0.0165737	0.0472787	0.023569	0.0444515	0.0907837	0.0242229	0.046788
543	SSTP_0000998000	0.00240156	0.0669741	0	0.0513911	0	0	0	0	0	0.0168131	0	0.0184738	0	0	0	0.0339224	0.0935185	0.0251535	0	0	0.0427084
544	SSTP_0000999750	0	0	0	0	0.0180284	0	0	0	0	0	0	0	0	0	0.0167126	0	0	0	0	0	0
545	SSTP_0001014400	0	0	0	0	0	0	0	0	0	0	0	0	0	0	0	0	0	0	9.66113e-08	0	0
546	SSTP_0001016600	0	0	0.0360943	0.154265	0.205407	0.0541851	0.309866	0.387773	0.22188	0.269156	0.149053	0.277321	0.0506811	0.0656475	0.032325	0.141228	0.0467718	0.0217385	0	0.0244299	0
547	SSTP_0001018500	0	0	0	0.068635	0	0.0180718	0.0886414	0.360543	0.148031	0.0168395	0	0.0185106	0	0	0	0.0706651	0	0	0	0.0244585	0
548	SSTP_0001019600	0	0	0	0.154084	0.0186181	0.036163	0.0220815	0	0	0	0	0	0	0	0	0.0235442	0	0.0217991	0	0	0
549	SSTP_0001019900	0.0168957	0.0172181	0	0.754072	0.821737	1.11914	0	0	0	0	0	0	0	0	0	0.0235272	0	0.0217185	0.0903862	0.0488575	0.0230029
550	SSTP_0001028100	0.0818206	0.103664	0.089623	0.048615	0.0350165	0.0274491	0	0.0544437	0.03679	0	0.0370748	0.0364164	0.197337	0.0622554	0.0166192	0.219587	0.0943596	0.0989338	0	0.0817861	0.0508221
551	SSTP_0001028500	0	0	0.0177485	0.0169272	0	0.0539993	0	0	0	0	0	0	0.0253891	0	0.0164003	0.0234382	0.0467131	0.0440317	0.0900378	0.0240307	0.0463063
552	SSTP_0001028600	0.582084	0.258515	0.393249	0	0.0366552	0.0362587	0.0656328	0	0	0	0	0.0182548	0	0.0496938	0.032998	0.165328	0.0235062	0.177297	0	0.0725588	0.139914
553	SSTP_0001028700	0.151926	0.155145	0.0541301	0	0.0186628	0	0	0.0553895	0	0	0	0	0	0	0	0	0	0.0218291	0.0906343	0.122187	0.0462028
554	SSTP_0001028800	0	0.0172678	0	0	0.0361544	0.0179847	0	0	0	0	0	0	0.0256138	0	0	0	0.0235023	0	0	0	0.0465205
555	SSTP_0001037300	0.119013	0	0	0.111974	0.110978	0	0	0	0	0	0.105835	0	0.147287	0	0.241985	0.165398	0	0	0	0	0
556	SSTP_0001037400	0.0332373	0	0	0.0170232	0	0.0180922	0	0.0272877	0.0737177	0	0	0	0	0.0165204	0	0.0471187	0.0703096	0.0441488	0.0905662	0.0725106	0.0929923
557	SSTP_0001037500	0	0.0171599	0	0.0509213	0.0547046	0.0360987	0	0	0.0366764	0	0	0	0	0	0.0164455	0.141017	0.0936832	0.154536	0	0.144581	0.0928675
558	SSTP_0001037600	0.016664	0.017267	0	0.0341509	0.0367094	0.0363118	0.0876531	0.0819513	0.14779	0.0167513	0.0163818	0.0182787	0.0256133	0	0.0165411	0.189303	0.117776	0.199881	0.363326	0.290883	0.0700726
559	SSTP_0001037800	0.202526	0.155047	0.108229	0.017145	0.0373177	0.0542781	0	0	0	0	0.033098	0	0	0	0	0.094261	0.0702438	0.087191	0	0.146555	0.253792
560	SSTP_0001037900	0.270983	0.224007	0.483749	0.0738426	0.144187	0.0778898	0.0835873	0	0.0369379	0.117826	0.0497926	0.0370267	0	0.02359	0.0214871	0.0961644	0.0515204	0.109954	0.228967	0.151086	0.34046
561	SSTP_0001038000	0.389296	0.206818	0.469975	0.0686202	0.0561209	0.0541548	0.0221636	0.0277404	0.0369726	0.0841775	0.149311	0.111069	0.025328	0	0	0.0941442	0.0233823	0.0217056	0.180828	0.171219	0.206968
562	SSTP_0001038050	0.016733	0.0172144	0.89817	0.0171004	0	0	0	0	0	0	0	0	0	0	0	0	0.011732	0.0220225	0.0908067	0	0
563	SSTP_0001038200	0	0	0	0.119537	0.0550064	0.109114	0	0	0	0	0	0	0	0	0	0	0	0	0.453892	0.169661	0.140618
564	SSTP_0001038700	0.254038	0.12062	0.198902	0.102913	0.0561473	0	0	0.027748	0.0369396	0.0841619	0.0663885	0.0740528	0.177115	0.393223	0.225588	0.141111	0.0934544	0.260031	0.0903402	0.0244622	0.0229649
565	SSTP_0001038900	0.0451077	0	0.039748	0.0857708	0.0374496	0.0539643	0	0	0	0	0	0	0	0	0	0.0235132	0	0.086612	0	0	0.0318716
566	SSTP_0001038933	0.0670428	0.223573	0.251217	0	0	0.0181256	0.0439952	0	0	0	0	0	0	0	0	0.0235857	0.02344	0.0658051	0	0.0243297	0.115866
567	SSTP_0001038966	0.0168528	0.0172104	0	0.0342555	0.055896	0.0361679	0.0662897	0.0276493	0.0370042	0.201726	0.115686	0.0923111	0.0507397	0.0492993	0.0162045	0.164839	0.0467968	0.130764	0	0.0243974	0.0922609
568	SSTP_0001040000	0.0356566	0.105006	0	0	0.05469	0	0	0	0	0	0	0	0.0628698	0	0	0.423034	0.0641264	0.206056	0.18277	0.125206	0.0597322
569	SSTP_0001040050	0	0.0172169	0	0.0171224	0	0	0	0	0	0	0	0	0	0	0	0.0235955	0	0	0	0	0
570	SSTP_0001042300	0	0	0	0.0171033	0.0185328	0	0.0439868	0	0	0.0167897	0	0.0367959	0.0509348	0.0329985	0	0.259634	0.0469136	0.0878748	0	0.0243339	0
571	SSTP_0001042800	0	0	0	0	0	0	0.0219709	0.027492	0	0.0334943	0	0	0.0253699	0.0821972	0.113772	0	0.0233769	0.0218586	0	0.0485789	0
572	SSTP_0001042950	0.0333304	0.0172197	0	0	0.0551348	0.0181368	0.131452	0	0.0369414	0.284682	0.0491109	0.237792	0.102124	0.26481	0.362045	0.0708253	0.0939436	0.0221163	0	0	0
573	SSTP_0001044200	0.0676936	0.120618	0.0903648	0.0171515	0.0187041	0.0360933	0	0.0277357	0	0	0	0	0	0	0	0.423542	0.163634	0.238685	0.0903909	0.0489105	0.160927
574	SSTP_0001046400	0.0166121	0	0	0.169347	0.0181436	0.108164	0.0216965	0	0.0362517	0	0.0163932	0	0	0.0334041	0.0335808	0.260192	0.16574	0.359869	0.0900159	0	0
575	SSTP_0001046550	0.0169227	0	0	0	0	0	0.0220619	0	0.0736728	0.0170586	0	0	0	0	0	0	0	0	0	0	0
576	SSTP_0001046600	0	0.0344387	0.0360968	0.0342784	0.0373508	0.0361085	0.132802	0.166201	0.147875	0	0.016563	0.0369755	0.101322	0.0164049	0.0161526	0.117654	0	0.0217249	0	0.0244295	0.0460172
577	SSTP_0001048100	0	0.0172105	0	0.342353	0.241376	0.163191	0.418444	0.330753	0.296575	0.0167928	0.0164765	0	0	0	0.0326125	0.0235953	0.0234441	0.0438558	0	0.04871	0
578	SSTP_0001048700	0	0.0171802	0.125995	0	0	0	0	0	0	0.0167819	0	0	0	0	0.032271	1.15092	0.44338	0.868098	0	0	0.0459581
579	SSTP_0001053100	0.0337213	0.0172161	0	0	0	0	0.0221054	0	0	0	0.0165338	0.0184693	0	0.0164359	0	0.0235539	0	0.0217967	0	0	0.023068
580	SSTP_0001057400	0.066884	0.0516246	0	0.0512821	0.0739504	0.0544572	0.0658616	0.0824291	0.148121	0.134209	0.0328405	0.1286	0.229364	0.181687	0.147458	0.0708584	0.0938382	0.0440587	0	0.0729047	0.0464654
581	SSTP_0001061600	0	0	0	0	0	0	0	0	0	0	0	0	0	0	0	0	0	0	0	0	0
582	SSTP_0001063300	0.016703	0.0171506	0	0	0	0.0361695	0	0	0	0	0	0	0	0	0	0.752874	0.140282	0.240836	0	0	0
583	SSTP_0001064500	0	0	0.0540502	0	0.0186299	0	0.0442017	0.0276554	0	0.0504931	0.0165273	0	0.0509121	0	0	0.519425	0.305027	0.481732	0	0	0
584	SSTP_0001065000	0	0	0	0.0856795	0.0560234	0.0241119	0.325364	0.609347	1.2196	0	0	0	0	0	0.0161456	0.0235232	0.0233704	0	0	0.0451116	0.03456
585	SSTP_0001065200	0.0169063	0.0344546	0	0.137177	0.0373747	0.12034	0.139484	0.083149	0.110942	0.0504843	0.04972	0.110992	0.0253365	0.0328172	0.113087	0	0.0467706	0	0.271282	0.00374334	0.0344546
586	SSTP_0001071075	0	0	0	0	0	0	0	0	0	0	0	0	0	0	0	0	0	0.0438689	0	0.0239055	0.0230874
587	SSTP_0001071100	0.03307	0	0	0.0169484	0	0	0	0	0	0	0	0	0	0	0	0.0235973	0	0.0670382	0.0901411	0.096331	0.046698
588	SSTP_0001071500	0.134764	0.0860183	0.144049	0.0684837	0	0.0180776	0.0441749	0	0	0.235254	0.0495584	0.0738185	0.0253608	0.0164273	0.0647969	0.612031	0.397627	0.413952	0.180914	0.0731624	0.069172
589	SSTP_0001071600	0.0499971	0.103508	0.0179028	0.0170752	0	0	0	0.0273475	0	0.134058	0.0327577	0.0365874	0.0255756	0	0.0165078	0.260096	0.164597	0.133061	0	0.0242497	0.0699803
590	SSTP_0001071700	0	0	0	0	0	0	0	0	0	0	0	0	0	0	0	0.117168	0	0.0886059	0	0.023935	0
591	SSTP_0001071800	0.0165794	0	0	0	0	0	0	0	0	0.0500642	0	0.0181141	0	0	0	0.047225	0.118128	0.111755	0	0.0241133	0.0234013
592	SSTP_0001072000	0.0168999	0	0.0360974	0.0171301	0	0	0	0	0	0.0168111	0	0	0.0758804	0	0.0161194	0.0705101	0	0.0867106	0	0	0.0229661
593	SSTP_0001072100	0	0.0344313	0	0	0.0373198	0.0180639	0.0221188	0	0	0	0.0165499	0	0	0	0	0.0235378	0.0935359	0.10875	0	0.0732495	0.0460575
594	SSTP_0001072200	0.0168819	0.0344102	0.0180341	0.0342501	0	0	0	0	0.0369365	0	0	0.0184727	0.0253081	0.0163904	0.0161386	0.0705314	0.0700743	0.130228	0.0903226	0.0732292	0.160915
595	SSTP_0001072250	0	0	0	0.0169412	0	0	0	0	0	0	0	0	0	0.0163932	0	0	0.0465371	0.0218693	0	0	0
596	SSTP_0001072300	0.0337224	0.0516449	0.0540669	0.139587	0.115805	0.129913	0.110525	0	0	0.218605	0.314146	0.207051	0.0253713	0.0164329	0.0162015	0.0471013	0.046803	0.0653731	0	0.048812	0.0230629
597	SSTP_0001072400	0.0333828	0	0.0181283	0.051088	0.0182472	0.0362824	0.021813	0	0	0.0336257	0.0329594	0.0361638	0	0.0335628	0	0	0.0237933	0.0678226	0	0.0242319	0.0468709
598	SSTP_0001072500	0.0336526	0	0	0	0.0186134	0	0.0220822	0	0	0.0672715	0.11559	0.0184607	0	0	0	0.0471851	0.0468924	0.0656542	0.0906703	0	0.046298
599	SSTP_0001072600	0.0167323	0	0.0359503	0	0	0	0	0.0273961	0	0	0.016446	0	0	0	0	0.0237299	0.0236535	0	0.0911774	0.0730302	0.140748
600	SSTP_0001072700	0	0.086118	0.0180464	0	0.0373435	0.0361367	0	0.055391	0.11098	0.0168244	0.0165602	0.0369755	0	0	0	0.0235455	0.0233925	0.021752	0.0904616	0.219878	0.230326
601	SSTP_0001072800	0.100285	0.103923	0.143714	0.291319	0.184192	0.21864	0.131922	0.0548231	0.185311	0.302497	0.0164309	0.036692	0	0	0	0.0712088	0.0472476	0.0890916	0	0	0.0234355
602	SSTP_0001073000	0.0843618	0.034477	0.0541111	0	0	0	0.154879	0	0	0.30308	0.0496435	0.0924466	0	0	0.0162427	0	0.0234427	0	0	0	0.0231173
603	SSTP_0001073400	0	0.0344033	0.0179487	0.0342091	0.018544	0	0.0220041	0.0275371	0	0	0.0164607	0	0	0.0164887	0.0489353	0.0471805	0.0703261	0.0438662	0.18128	0.0243382	0.0927012
604	SSTP_0001073500	0	0	0.0179339	0.0340076	0.0363837	0	0	0	0	0	0	0	0	0	0	0.0235853	0.0471701	0.0446056	0.271041	0.0240968	0.186934
605	SSTP_0001073800	0	0	0	0	0	0	0	0	0	0	0	0	0	0	0	0	0	0	0	0	0
606	SSTP_0001074300	0	0.023206	0.0261151	0	0	0	0	0	0	0	0.0221513	0	0.0344423	0	0	0	0	0	0	0	0
607	SSTP_0001074500	0	0.0280441	0	0.281292	0.281815	0.474905	0.0220965	0.0552999	0.0369675	0	0.0108043	0	0	0.0215751	0.0161743	0	0.0418941	0.0524258	0.309337	0.782607	0.483126
608	SSTP_0001076500	0.15161	0.172186	0.144091	0.0171345	0.0745075	0.0543084	0.0220943	0	0	0.0672659	0.0495683	0.0738565	0.0508037	0.0329098	0	0.0942894	0.140533	0.109181	0.181159	0.512432	0.600701
609	SSTP_0001087850	0	0.0180533	0	0.0845856	0.16383	0.124737	0.108132	0.05364	0.107868	0.0338898	0.0334327	0	0	0.0171543	0	0	0.0243113	0	0	0.0241938	0.0232448
610	SSTP_0001091200	0	0	0	0.359389	0.129332	0.381589	0.197684	0.466866	0.111185	0	0	0	0.0255421	0	0	0	0	0	0	0	0.0232943
611	SSTP_0001094150	0	0	0	0	0	0	0.0222042	0.0276488	0	0.0169572	0	0	0	0	0	0	0	0	0	0	0
612	SSTP_0001095600	0.0167966	0.0709332	0.0364722	0.0507437	0.108864	0.125517	0.259964	0.402675	0.288041	0.201154	0.0823233	0.053444	0	0.168085	0.152687	0.119488	0.0952319	0.136005	0.0896635	0	0.0464371
613	SSTP_0001099500	0	0	0.0179049	0	0.0184763	0.0181185	0	0	0	0	0	0	0	0.0164742	0	0.0471452	0.0234131	0	0.906148	0.704106	0.625751
614	SSTP_0001111500	0.033409	0	0.0896408	0.102672	0.0184216	0.0545386	0.0439206	0.137106	0.111086	0.033571	0.0492267	0.0183348	0.153547	0.0829483	0.0329908	0	0	0.0221685	0	0.0485672	0.116764
615	SSTP_0001113300	0.336526	0.0862337	0.18004	0	0.0186161	0	0	0	0	0.0168326	0	0	0	0	0	0.023634	0	0	0.0908242	0	0.0232076
616	SSTP_0001113400	0.0169006	0	0	0.0171523	0	0.0180787	0	0	0	0	0	0.0184985	0.0507281	0	0	0	0	0	0	0	0
617	SSTP_0001117500	0	0.0220981	0.0352713	0.115892	0.0154836	0.0300434	0.152454	0.424796	0.750127	0.0848323	2.08389e-05	0.0633205	0.0615291	0.0760085	0.0871258	0.0808935	0.0524827	0.041475	0.449394	0.331783	0.100888
618	SSTP_0001117700	0	0	0	0.325292	0.317171	0.378671	0.0663327	0	0.110778	0	0	0	0.101197	0.213081	0.209714	0	0.0700513	0	0.270879	0.097616	0.390642
619	SSTP_0001121800	0.0338864	0	0	0.274435	0.205951	0.0901165	0.0443449	0.0832653	0.147697	0.336645	0.11622	0.166644	0.151739	0.180132	0.289795	0.117553	0.0700655	0.108253	0.0903065	0.024466	0.0458982
620	SSTP_0001126700	0	0.0515975	0.0180189	0	0	0	0	0	0	0.0504015	0.0826735	0.221525	0.0506377	0.0163984	0.0646159	0.0705438	0.046724	0.108637	0.45172	0.219553	0.368083
621	SSTP_0001127500	0.0170901	0.0248246	0.0180147	0	0	0	0	0	0	0.0196656	0.0399134	0.0369349	0	0	0.0273019	0.0295693	0.0702616	0.0436607	0.0982908	0.0760526	0
622	SSTP_0001127900	0	0	0	0.238232	0	0	0	0.306421	0.321305	0.167958	0.414465	0.126786	1.2734e-08	7.47487e-07	0	0.319576	0	0	0	0.130359	4.22683e-09
623	SSTP_0001128200	0.283034	0.309402	0.322735	0.0170453	0	0	0	0	0	0	0	0.0182957	0	0.0989943	0.0163837	0.188493	0.210813	0.132067	0.362146	0.411961	0.371986
624	SSTP_0001128500	0	0	0	0	0	0	0	0	0	0	0	0	0	0	0	0	0	0	0	0	0
625	SSTP_0001128700	0	0.0171879	0	0	0	0	0	0	0.0369282	0	0	0	0	0	0	0	0.0233514	0.0217258	0	0.0243746	0
626	SSTP_0001128800	0	0	0	0	0.018572	0	0	0	0	0	0	0	0	0	0	0.0235156	0	0.0435847	0	0	0
627	SSTP_0001128900	0	0	0	0.140009	0.305186	0.275016	0	0	0.184379	0	0	0	0.283793	0.133326	0	0.12729	0	0	0	0.125641	0.249353
628	SSTP_0001131300	0.067457	0.0515921	0.12613	0	0	0.072165	0	0	0	0	0.0330694	0	0.0506255	0.0163943	0.0322968	0.164569	0.116786	0.195477	0.0903252	0.0975736	0.0689947
629	SSTP_0001133500	0.0699293	0.0765725	0.218267	0	0	0	0	0	0	9.53628e-10	0	0	0	0.0435917	0.070269	0	0.107672	0.0506415	0	0.0706715	0.199303
630	SSTP_0001133800	0.01682	0.0344182	0	0.0684902	0.167416	0	0	0.027614	0.0370368	0	0	0	0	0	0	0.0942655	0.0936831	0.0874095	0.0905714	0.0731272	0.0924617
631	SSTP_0001143100	0	0.0305028	0	0.179865	0.11641	0	0.0471825	0	1.42222e-07	0	0	0	0	0	0	0	0	0	0	0	0.00490329
632	SSTP_0001143200	0	0.0344772	0.0543222	0.01716	0.0749873	0.0540322	0.0221928	0.0277836	0	0.101037	0.0664931	0.0370613	0.0252734	0.0490909	0.0482276	0.141021	0.210121	0.194565	0.270815	0.171398	0.458476
633	SSTP_0001143216	0	0	0	0.0169085	0	0	0	0	0	0	0	0	0	0	0	0.0701022	0	0.0218731	0	0	0.0277216
634	SSTP_0001143232	0	0	0	0.0170176	0	0.0540833	0	0	0	0	0	0	0.0252981	0.0163942	0	0.0234597	0.0466166	0.0218031	0	0.14527	0.069133
635	SSTP_0001143400	0	0	0	0	0	0	2.03374e-09	0	0.224002	0	0	0.00511387	0	0	0	0	0	0	0	0	0
636	SSTP_0001143500	0	0	0	0.0934445	0.0394915	0.152088	0	0	0	0	0	0	0	0	0	0	0	0	0	0	0
637	SSTP_0001144200	0.0505331	0.0177783	0	0	0	0.0180255	0	0	0	0.0337373	0	0.017957	0	0	0	0	0	0	0.090204	0.169452	0.186982
638	SSTP_0001144300	0.0499546	0.0517408	0	0.0853588	0.0734077	0.145187	0.0218968	0.0273223	0.0369253	0.0502306	0.163683	0.109659	0.0511703	0.0828637	0.033024	0.141877	0.0235261	0.0887205	0.18154	0.193809	0.210019
639	SSTP_0001144500	0.0166591	0.0259993	0.0179571	0.0426943	0.0182989	0.0363506	0.174977	0.258848	0.349731	0	0.0245849	0.0273618	0.0256771	0	0.0083247	0.023662	0.0236328	0.0111503	0	0.084758	0.0117216
640	SSTP_0001144700	0	0	0	0	0	0	0	8.97429e-07	0	0	0	0	0	3.022e-07	0	0	0	0	0	3.14183e-07	0
641	SSTP_0001148100	0.0714796	0.0779026	0.0545063	0	0	0	0	0	0	0	0	0	0	0	0	0	0	0	0.0897789	0.120439	0.0749445
642	SSTP_0001148200	0	0	0	0	0	0	0	0	0	0	0	0	0	0	0	0	0	0	0	0	0
643	SSTP_0001148500	0	0	0	0	0	0	9.10166e-05	0	0	0	0.162487	0	0	0	0	0	0	0	0	0.116804	0
644	SSTP_0001149000	0.112218	0.133784	1.76364	0	0	0	0	0	0	0	0	0	0.0126701	0.0168285	0.0334549	0.0237598	0.0477781	0.0600208	0	0.0341726	0.0579361
645	SSTP_0001149100	0.0277713	0	0.00455202	0	0	0	0	0.1603	0	0	0	0	0	0	0.0405589	0.280322	0.265007	0.0677776	0	0	0
646	SSTP_0001149500	0	0	0.183994	0	0	0	0	0	0	0	0	0	0	0	0	0.00967615	0	0	0	0	0
647	SSTP_0001150110	0.0504737	0.0688626	0	0.0342581	0.0372158	0.0724604	0.110379	0.138113	0.111158	0.184906	0.132061	0.166075	0	0.0658685	0.0162568	0.117881	0.0627902	0.131171	0	0	0
648	SSTP_0001150200	0	0.0705429	0.0268732	0	0.19895	0.211196	0.0807971	0	0	0	0.0422912	0	0	0	0	0.107277	0.12554	0	0	0.0578514	0
649	SSTP_0001150700	0.0201386	0	0.0436142	0	0	0	0	0	0	0	0	0.0254207	0	0.0632784	0.0213945	0.0672527	0	0	0	0	0.029567
650	SSTP_0001151000	0	0	0	0	0	0	0	0	0	0	0	0	0	0	0	0	0	0	0	0	0
651	SSTP_0001158600	0.0168127	0	0	0.0343567	0	0.0547122	0	0	0	0	0.0165036	0.0369335	0	0	0	0.0237242	0	0	0	0	0
652	SSTP_0001168200	0.0844953	0.0516678	0.0722096	0.034285	0.0560392	0.0541701	0.0664151	0.249357	0.0792303	0.252353	0.331335	0.35134	0.202672	0.11485	0.0646198	0.0470688	0.0701456	0.0217269	0.0904146	0.0244346	0.0460224
653	SSTP_0001169600	0.134927	0.120508	0.234337	0.0171331	0.14917	0.0542383	0.0221097	0.0553314	0.0740028	0.0168163	0.0661513	0.0369422	0.177557	0.0821434	0.0161944	0.0470968	0.210579	0.108906	0.361942	0.512589	0.207493
654	SSTP_0001177300	0.0337439	0.0516779	0.0721352	0.0857168	0.0932629	0.0542866	0.154835	0.0276783	0	0.0336531	0.0165445	0.0184806	0.0507752	0.0164434	0	0.730537	0.163915	0.545124	0.090559	0.122108	0.0692329
655	SSTP_0001181000	0.0168592	0.0344075	0.0540514	0	0	0	0	0	0	0	0	0	0	0.0164121	0	0.564691	0.163637	0.478599	0	0.0243951	0.0230291
656	SSTP_0001188200	0.0506541	0.0861284	0.144344	0.154293	0.149325	0.072319	0.243416	0.193837	0.0740173	0.0168264	0	0	0	0	0	0.282658	0.070207	0.130635	0.181012	0.219855	0.184402
657	SSTP_0001188900	0.0338036	0.0861229	0.0722201	0.0514334	0.0934131	0.144462	0	0	0	0	0	0.018494	0.0253355	0	0	0.164754	0.0233836	0.0434547	0	0.0244378	0.0230121
658	SSTP_0001199400	0	0	0	0.0171273	0	0	0.176892	0.027669	0.0369656	0	0	0.0184708	0	0	0	0.141171	0.0233757	0.0217407	0.0903973	0.0244085	0.0230191
659	SSTP_0001210100	0.0165337	0.0173284	0	0.0338356	0.0181198	0.0540536	0	0	0	0	0	0	0.0514597	0.01662	0	0.0235528	0	0.0223583	0	0.0240513	0.093262
660	SSTP_0001211900	0.0503286	0.0172007	0	0.205286	0.278361	0.217435	0.11006	0.110197	0.296374	0.0503527	0.0164675	0	0.0508565	0.0494324	0.0651779	0.0235806	0.0234282	0.0876439	0	0	0
661	SSTP_0001213300	0	0.0344337	0	0.0171375	0	0.0180275	0.0442869	0	0	0.168181	0.0331528	0.129459	0.0758832	0.03276	0.0644612	0.0940284	0.0700593	0.043344	0	0	0
662	SSTP_0001219450	0	0	0	0.138047	0.0206879	0.0356848	0.0812318	0.0986628	0	0.0178817	0	0.0197391	0.0231415	0.0157471	0	0	0	0	0	0	0
663	SSTP_0001221850	0.0167271	0.0515423	0.0358423	0	0.0370106	0.0181175	0	0.0549649	0.111011	0	0.0164245	0	0.0254297	0.0658991	0.0163132	0.23568	0.0936879	0.241296	0.543459	0.242978	1.08875
664	SSTP_0001221900	0.0352071	0.0171903	0.182292	0	0	0	0	0.0291537	0.0184939	0	0.0164898	0.0184301	0.101481	0.03287	0.0486584	0.250289	0.0701711	0.109063	0	0	0.0274096
665	SSTP_0001226975	0.01968	0.0322221	0.0390785	0.0470453	0.0451203	0.0371585	0.0215551	0	0.0325508	0.0180628	0.0150771	0	0.0488711	0.0157664	0.0123869	0.0234053	0.0566174	0.0381868	0.118273	0.0250096	0.0241715
666	SSTP_0001227100	0.0673832	0.225162	0.108307	0	0	0	0	0.0553512	0.0746084	0.0168912	0	0	0	0	0	0	0	0	0	0	0
667	SSTP_0001230400	0	0	0	0	0.0372264	0	0	0	0	0	0	0	0	0	0	0	0	0.0217649	0	0	0
668	SSTP_0001235100	0	0	0	0	0	0.164879	0.173653	0.335663	0	0.127229	0	0	0	0	0	0.427313	0	0	0	0	0
669	SSTP_0001237400	0.0675351	0.173079	0.19843	0.205623	0.111986	0.200842	0.0221232	0	0.0369758	0.201806	0.115875	0.221761	0.0760163	0.147699	0.0808209	0.0706039	0.0704842	0.130445	0.0904195	0.195365	0.230212
670	SSTP_0001237500	0	0	0.0536633	0.0852579	0.0366156	0	0.0218774	0	0.0368123	0.0334375	0.0327298	0.0182324	0.0255553	0.016588	0.0992098	0	0.0235383	0.0221928	0.0906712	0.0726288	0.0934229
671	SSTP_0001246750	0	0	0	0	0	0	0	0	0	0	0	0	0	0	0	0	0	0	0	0	0
672	SSTP_0001252550	0.084061	0.051623	0.143883	0.0684876	0.185975	0.0724443	0.176499	0.110429	0.259284	0.117612	0.164985	0.0737755	0.0762357	0.0493884	0.0487638	0.164984	0.0468455	0.0437177	0.45292	0.1706	0.254348
673	SSTP_0001252600	0.0505647	0.0711795	0.128096	0.0509199	0.0364139	0.0539797	0.0869559	0.0538765	0.144521	0.0672841	0.0330436	0.0536296	0.026176	0	0	0.143883	0.0716719	0.0682387	0.449873	0.241988	0.442685
674	SSTP_0001258900	0.016751	0.0171941	0.107641	0.102576	0.111174	0.126895	0	0.0275186	0	0	0	0	0.0254401	0	0.0163164	0.0471669	0	0.0438741	0	0.0486446	0.115873
675	SSTP_0001263200	0.184014	0.0863267	0.484614	0	0.0184851	0	0	0.0274829	0	0	0.0164369	0	0	0	0	0.284202	0.141399	0.243643	0.0910291	0.267706	0.326825
676	SSTP_0001263300	0.116178	0.0515403	0.32092	0	0	0.0180844	0	0	0	0	0	0	0.02547	0	0	0.164832	0.0468335	0.110426	0.090416	0.0724487	0.139382
677	SSTP_0001266600	0	0	0	0.0511279	0.03674	0	0	0	0	0	0	0	0	0	0	0.518159	0.187654	0.529118	0	0	0
678	SSTP_0001267100	0.0167515	0	0.216578	0	0.0184056	0	0.0879482	0.27408	0.111021	0	0	0	0	0	0	0.404342	0.0949751	0.201675	0	0.0243544	0
679	SSTP_0001267200	0	0	0.0902411	0	0.018545	0	0.0221074	0.110419	0	0	0	0	0	0	0	0.0714677	0.0236989	0	0	0	0
680	SSTP_0001267300	0.0167723	0.0172133	1.11351	0.0171153	0.0185505	0.0181445	0	0	0	0.0167965	0	0	0	0	0	0.0944285	0.0938549	0.0658729	0	0.0486986	0.0231972
681	SSTP_0001268100	0.033554	0.0171908	1.11287	0	0	0.0181031	0.0220213	0	0	0	0	0	0	0.0164565	0	0.282649	0.140448	0.284352	0	0.0243348	0.0231268
682	SSTP_0001268300	0.0500249	0.0703561	0.0544591	0	0.0181054	0.0178935	0	0.0267801	0.0719551	0.0167264	0.0327376	0.0178092	0.233907	0.016716	0.0675823	0.254612	0.118296	0.135311	0	0	0
683	SSTP_0001268850	0.0169	0.0172218	0.0180528	0	0	0.108321	0	0	0	0.117759	0.0662696	0.0924617	0.0253296	0	0	0.0470627	0.0467572	0.0434424	0.0904018	0.0488687	0.0460122
684	SSTP_0001269900	0	0	0	0	0.0187743	0	0	0	0	0	0	0	0	0	0	0	0	0	0	0	0
685	SSTP_0001270000	0	0	0	0	0	0	0	0.0267116	0.0358857	0.0166837	0	0	0	0	0.0337048	0	0.0235987	0.0449886	0	0.0239488	0
686	SSTP_0001270050	0	0.0342729	0	0	0	0.0180506	0	0	0	0	0	0.0183506	0.0253277	0	0	0.0704558	0.046678	0.0218181	0	0	0
687	SSTP_0001270100	0.0339581	0.258634	0.144936	0.017164	0.0375166	0.126037	0.0222026	0.0555945	0.0737977	0	0.016633	0	0.0252665	0.0490756	0	0.282009	0.373494	0.410476	0.270773	0.122475	0.160389
688	SSTP_0001270200	0.016768	0.0171985	0	0	0.0185422	0	0	0	0	0	0	0.0184071	0	0	0	0.0943381	0.0234373	0.0877098	0	0	0.046338
689	SSTP_0001270400	0.016837	0.0171996	0.0539977	0.0855839	0.111697	0.198835	0.0220786	0	0	0	0	0	0.0253608	0	0.0162022	0.235378	0.187106	0.239702	0.180893	0.487595	0.484254
690	SSTP_0001270600	0	0.017235	0.0178903	0	0.036734	0.018139	0	0.0273527	0	0	0	0	0	0	0	0.0708612	0.0235027	0.022141	0	0.0484604	0.0699357
691	SSTP_0001270625	0	0	0	0.0170678	0.0369129	0.0241683	0.00730576	0	0.0369629	0	0	0	0	0.0164991	0	0	0	0	0.135936	0	0.040603
692	SSTP_0001270700	0.378543	0.0620117	0.270998	1.22245e-06	0	0	0.0221259	0	0	0.0168164	0	0	0	0	0.0161563	0	0.0269025	0.0217302	0	0	0.0256555
693	SSTP_0001270800	0	0.0171534	0.0536259	0.170444	0.0184428	0.0723761	0	0.0548098	0	0	0	0	0	0.016453	0.0163141	0.11769	0.140294	0.0658219	0	0	0.02314
694	SSTP_0001270900	0	0	0.0541064	0	0.055986	0.0360838	0	0.0553609	0.0369434	0.0168085	0.0165512	0	0.0253131	0.0655749	0.0161418	0.0470291	0.116811	0.086841	0	0.0732366	0.137957
695	SSTP_0001271000	0.033909	0.0517102	0.0361947	0.171579	0.093671	0.162199	0.133099	0.0277696	0	0.151539	0.0166127	0.129669	0.379329	0.180118	0.177037	0.21161	0.116782	0.432866	0.0903102	0.0734303	0.137666
696	SSTP_0001271200	0.0203173	0.0193572	0.0466309	0.0194864	0.148144	0.112759	0.0725966	0	0.043711	0.145027	0.0931966	0.061496	0.283579	0.193011	0.173722	0.128176	0.0765393	0.137143	0	0.0880193	0.0481802
697	SSTP_0001271400	0.0337452	0.0344259	0.0180299	0.102786	0.205175	0.12646	0	0.027671	0.0369805	0.0336278	0.0827213	0.110839	0.329508	0.459649	0.194106	0.047074	0.116923	0.0652661	0	0	0.161226
698	SSTP_0001271700	0.0994723	0.0521867	0.0359078	0.0509795	0.0363891	0.0543573	0	0.0270888	0	0.0334193	0.0818793	0.0361734	0.128734	0.299793	0.502562	0.189277	0.0946559	0.179241	0	0	0
699	SSTP_0001271750	0	0	0	0.0168651	0	0.0179542	0	0	0	0.18283	0.0488605	0.0717254	0.257163	0.298659	0.216631	0.0704066	0.0940566	0.0223356	0	0.0239925	0
700	SSTP_0001271900	0.0462495	0.0729772	0.0468086	0.214663	0.154118	0.0883773	0	0	0.0328689	0.0729676	0.0312563	0.172451	0	0.0614727	0.0590132	0.0253604	0.0453507	0.0828332	0.110678	0	0.0513656
701	SSTP_0001280500	0.0168922	0.0516744	0.0360964	0.240013	0.0933683	0.216836	0.132806	0.30468	0.443933	0.15143	0.149057	0.055468	0.278866	0.131354	0.129379	0.0941857	0.0467867	0.0652553	0	0	0
702	SSTP_0001281100	0.0332515	0.0174449	0	0.0511241	0.109477	0.163534	0.0655843	0.0543313	0.0365878	0.318384	0.361291	0.253931	0.0516397	0.0501073	0	0.142361	0.0711934	0.0449374	0.181272	0.145289	0.0939088
703	SSTP_0001281200	0.0337005	0	0.0540423	0.154208	0.0558918	0.0724033	0.154684	0	0	0.168178	0.0991593	0.129265	0	0	0.0162271	0.047135	0.0234169	0.196424	0.0905633	0.0488064	0.11547
704	SSTP_0001281400	0.0334364	0.0516559	0.0358591	0.119717	0.277366	0.308782	0.0658847	0.109891	0.074074	0.386086	0.114972	0.165376	0.0765155	0.0330737	0.131246	0.118236	0.117423	0.154453	0	0.0486057	0.0465076
705	SSTP_0001281500	0	0	0.0720969	0.0342506	0.0186465	0.0180593	0.0442111	0	0.0369673	0.201699	0.115774	0.129271	0.10135	0.0492304	0.0970159	0.352932	0.116881	0.152229	0	0.0732078	0.0460477
706	SSTP_0001281600	0.0667723	0.120799	0.0716911	0	0.0184079	0.0363477	0.416992	0.0274108	0	0.486794	0.0984043	0.183264	0.0767811	0.165911	0.0989811	0.30754	0.32951	0.177414	0.181944	0.0485457	0
707	SSTP_0001282300	0.113475	0.0172353	0.126275	0.171524	0.130609	0.0905542	0	0	0	0.117843	0.0827494	0.12942	0	0.032915	0	0.0471659	0.0468657	0.0436541	0	0.073297	0
708	SSTP_0001282400	0	0.051714	0	0.25135	0.326478	0.282482	0	0	0	0	0	0	0	0	0	0.0298257	0	0	0	0.122251	0
709	SSTP_0001282500	0	0	0.0179878	0.105025	0	0.0590202	0	0	0	0	0	0	0.0253349	0.0164105	0	0.0643018	0	0	0	0	0
710	SSTP_0001282700	0.0505179	0.0688789	0	0.0171342	0	0	0	0	0	0	0	0.018462	0	0	0	0.0235769	0.0234294	0	0	0	0.0462314
711	SSTP_0001282800	0.0553239	0.0688872	0.126303	0.0514204	0.018668	0.0361373	0.0221288	0.0276908	0	0.0168226	0.0993424	0.0554552	0.0253511	0.0492576	0.0646957	0.0235448	0.0233919	0.0870165	0.27138	0.195419	0.34551
712	SSTP_0001283500	0.0334606	0.0194444	0.0381955	0	0	0	0	0	0	0	0	0	0	0	0.012429	0	0	0	0.173373	0	0.0232126
713	SSTP_0001283600	0	0	0	0	0	0	0	0	0	0	0	0	0	0	0	0.088057	0	0	0	0	0
714	SSTP_0001284200	0	0	0	0.238592	0	0	0	0.0271684	0.0367402	0.0166975	0.0490333	0.0363868	0.051257	0.0496881	0.0997708	0.0708596	0.212176	0	0	0	0
715	SSTP_0001284300	0.090236	0	0	0	0	0	0	0	0	0.0083909	0	0	0.0860316	0	0	0	0.070874	0	0	1.60519e-07	0
716	SSTP_0001285000	0	0	0.0418116	0.631327	0.449278	0.498003	0.0439774	0	0	0	0	0	0.0507701	0.0328947	0.0192682	0.0470769	0	0.08747	0.0904579	0.0243058	0
717	SSTP_0001285200	0.425438	0.275036	0.46549	0	0	0	0.0440536	0	0	0	0.0329459	0	0	0	0	0	0	0	0.20512	0.503672	0.261364

## Sheet: SrRNAseq_discardedGene_counts
File S3. Counts for genes discarded during preprocessing filtering
Low-count genes and associated log2CPM values discarded during preprocessing.
	geneID	FLM-ERR225783	iL3-ERR225784	PF-ERR299168	PF-ERR299169	PF-ERR299170	FLF-ERR299171	FLF-ERR299172	FLF-ERR299173	PF-ERR299174	PF-ERR299175	PF-ERR299176	FLF-ERR299177	FLF-ERR299178	FLF-ERR299179
1	SRAE_0000000250	0	0	0.0296008	0	0.0332347	0	0	0.0520945	0	0	0	0	0	0
2	SRAE_0000008800	0	0.177207	0	0	0	0	0	0	0	0	0	0	0.0281133	0
3	SRAE_0000009200	0	0.35825	0	0	0	0.136328	0.0286081	0	0	0	0.0331571	0.0911185	0	0
4	SRAE_0000009300	0	0	0	0	0.0333443	0.0456318	0	0	0.0298503	0	0	0	0	0
5	SRAE_0000012700	0	0	0.0582692	0.104761	0.0681795	0	0.0565276	0.0515371	0.118172	0	0	0.0448963	0.0539244	0.0564107
6	SRAE_0000016250	0.531731	0	0	0	0	0	0	0	0	0	0	0	0	0
7	SRAE_0000022000	0	0	0	0	0	0	0	0	0	0	0	0	0	0
8	SRAE_0000024200	0	0	0.0592394	0.0502815	0.0998711	0.0917416	0.0287796	0	0	0.0504303	0.0334087	0.0459875	0.0288738	0.156656
9	SRAE_0000025300	0.455715	0	0.0303291	0.0518255	0.0337482	0.0440045	0.0881067	0	0	0	0.0341875	0.172939	0	0.0562533
10	SRAE_0000028000	0	0	0.0891434	0	0.066411	0.0452153	0.0289799	0	0.0596155	0.0504275	0.0333118	0	0.0290003	0
11	SRAE_0000028700	0	0	0	0.053308	0	0	0	0	0.0297234	0	0.0339352	0	0.026766	0
12	SRAE_0000044500	0	0	0.0897561	0	0.0666244	0.134775	0.0292623	0	0	0.202635	0.100151	0.0450953	0.0292186	0
13	SRAE_0000045300	0	0	0.059411	0.100333	0.0331435	0	0.0579992	0	0.208643	0.0503657	0.0664751	0.0902434	0.0869794	0.0527533
14	SRAE_0000045400	0	0	0.0592317	0.0502698	0.0332806	0.0458411	0.0287794	0.0520858	0.0296849	0	0.0333984	0.183831	0.115485	0.0522214
15	SRAE_0000046200	0	0	0	0	0	0	0	0	0.0296572	0	0	0	0	0
16	SRAE_0000048000	0.277012	0	0	0	0	0	0.0324389	0	0	0	0	0.0485178	0.032326	0.0601433
17	SRAE_0000048400	0	0	0.0887894	0	0.0663353	0	0	0.104324	0.0593607	0	0.0998379	0	0	0.0523419
18	SRAE_0000048500	0	0	0.0295783	0	0	0	0.0287753	0	0.0889781	0	0.0333076	0	0.0288464	0.0522394
19	SRAE_0000048800	0	0	0.0581253	0	0.0333811	0.0464074	0.0275483	0	0.0873409	0.0550906	0.0328029	0	0	0
20	SRAE_0000049000	0.338132	0	0.0601573	0	0.033765	0.0927714	0.146295	0	0.060322	0	0.0677574	0	0	0
21	SRAE_0000049100	0	0.139124	0	0	0	0	0.0359181	0	0	0	0	0	0	0
22	SRAE_0000049200	0	0	0	0	0.066508	0	0	0	0	0.0504866	0	0	0	0
23	SRAE_0000049400	0	0	0.0593283	0.0503001	0.0665725	0.0456862	0.0577273	0	0.0297471	0.0504625	0.0744631	0.0458075	0.0578637	0
24	SRAE_0000049500	0	0	0	0	0	0	0	0	0	0.0504164	0	0	0	0
25	SRAE_0000049600	0	0	0	0	0	0	0.028618	0	0	0.0499392	0.0338785	0	0	0
26	SRAE_0000049700	0	0	0	0	0.0332675	0	0	0	0	0	0.033385	0	0	0.0522212
27	SRAE_0000050000	0	0	0.0592405	0	0.0332077	0	0.115325	0.26095	0.0297032	0	0.0333234	0.045644	0.115565	0.261818
28	SRAE_0000050100	0	0	0.0590865	0.0516064	0.102748	0.0863847	0.0284472	0	0.0583721	0.2619	0	0	0	0
29	SRAE_0000050200	0	0	0	0	0	0	0	0	0	0.0513911	0.0327884	0	0	0
30	SRAE_0000050300	0	0	0.0292889	0	0.0326478	0	0.0288184	0	0.0297008	0	0.0658791	0	0.0579242	0.108129
31	SRAE_0000050400	0	0	0.177661	0.0502713	0.0332859	0.045882	0.0287669	0.0520618	0.148385	0.100837	0.100213	0.0459986	0.0288634	0.0521915
32	SRAE_0000050900	0	0.353155	0.0886313	0	0.0664072	0.0572101	0	0.103908	0.0888353	0.0502999	0	0.0917272	0.0309387	0.0520871
33	SRAE_0000051000	0.10145	0.298207	0	0	0	0	0	0	0	0	0	0	0	0.051488
34	SRAE_0000051200	0	0	0.0285342	0.159373	0.0340225	0.0927893	0	0	0.0586934	0.0538445	0.0980759	0.0941476	0.0261911	0
35	SRAE_0000051300	0	0	0	0	0	0.0472829	0.0278204	0.0529951	0.029966	0	0	0	0.0271202	0.0541607
36	SRAE_0000051450	0	0	0	0	0	0	0	0.051185	0	0	0	0	0	0.105894
37	SRAE_0000051500	0	0	0.0294917	0	0	0	0.0288364	0	0	0	0	0	0	0
38	SRAE_0000051600	0	0	0	0	0.0340691	0.0432973	0	0.0540196	0	0	0	0	0	0
39	SRAE_0000051700	0	0	0.0596165	0	0.0666581	0.130948	0.0291191	0	0.0301647	0.0510894	0.0669452	0	0	0
40	SRAE_0000051800	0	0	0	0	0.0338177	0	0	0	0.0292043	0	0	0	0	0
41	SRAE_0000051900	0	0	0.0895629	0.0506375	0.0333005	0.0877616	0	0	0.121065	0	0.0335536	0.0434521	0.0587274	0.0548486
42	SRAE_0000052300	0.429032	0.215037	0	0.051263	0.0338665	0.0459325	0.0296487	0	0.0609345	0	0.0679199	0	0	0
43	SRAE_0000052500	0	0	0.0888755	0	0.099851	0.0458243	0.028793	0	0.0296955	0	0.0334011	0.137824	0.0866456	0.0522504
44	SRAE_0000052700	0	0.187494	0	0	0	0	0	0	0.0343524	0	0	0	0.0334118	0
45	SRAE_0000053000	0	0	0.029596	0	0	0	0	0	0	0	0	0	0	0
46	SRAE_0000053100	0	0	0.059192	0	0	0	0	0	0	0	0	0	0	0
47	SRAE_0000053200	0	0	0.0278591	0.051076	0	0.183957	0	0.0504374	0	0.053754	0	0.0478851	0	0.0508777
48	SRAE_0000053300	0	0	0	0	0.0332589	0	0	0	0.0297609	0	0	0.137051	0	0.157435
49	SRAE_0000053400	0	0	0	0	0.0689514	0.138372	0.0272094	0.254543	0	0.0557174	0.131183	0.0965859	0.0794853	0.0522914
50	SRAE_0000053900	0	0	0.0295719	0	0.0357523	0	0	0.104591	0	0	0.0331769	0	0.0269775	0
51	SRAE_0000054000	0	0	0.0595645	0	0	0	0	0.0516755	0	0	0	0	0	0
52	SRAE_0000054300	0	0	0.0298516	0	0	0	0	0	0	0	0	0.0443712	0	0.0537018
53	SRAE_0000054400	0.381193	0.30688	0.0283766	0	0.0635926	0	0.0278265	0	0	0	0	0	0.0561906	0.052444
54	SRAE_0000054500	0.0362044	0.187116	0.0298887	0	0.0670426	0	0.0290872	0	0.0299718	0.101665	0	0	0	0
55	SRAE_0000054600	0	0	0.0295938	0	0.0661786	0	0.0578192	0	0	0.0507219	0.0332318	0	0	0
56	SRAE_0000054800	0	0	0	0	0	0	0	0.0520003	0	0	0	0	0	0
57	SRAE_0000054900	0	0.260635	0.0262057	0	0	0	0	0	0	0.0442463	0.0293244	0	0	0
58	SRAE_0000055200	0	0	0.0592214	0	0.0331892	0	0.0864762	0.208732	0.029695	0	0	0.182387	0.115528	0.209442
59	SRAE_0000055400	0	0	0.0297235	0.0503083	0.0332659	0	0.0289607	0	0	0	0	0.0455688	0	0
60	SRAE_0000058200	0	0	0.0289509	0	0	0.0447638	0.0280856	0	0	0	0	0	0	0.056055
61	SRAE_0000058400	0	0.244201	0.0961891	0	0.0375876	0	0	0	0.0319418	0	0.0370093	0	0	0
62	SRAE_0000058700	0.138006	0	0.0346895	0	0	0.0550382	0	0	0.106465	0	0.038813	0	0	0
63	SRAE_0000058800	0	0	0.0296835	0.0500051	0.0330058	0	0.0290368	0	0	0.100455	0	0	0.0289787	0
64	SRAE_0000058900	0	0	0	0.050023	0	0	0	0	0.0297302	0	0	0	0.028918	0
65	SRAE_0000059300	0	0	0.0893824	0.10145	0	0	0	0	0.0604265	0.204278	0	0.043117	0.0294618	0
66	SRAE_0000059500	0	0	0	0	0	0	0	0	0	0	0	0	0.0288431	0
67	SRAE_0000059600	0	0	0.0296577	0.0499683	0	0	0	0	0	0	0	0	0.0289605	0
68	SRAE_0000059700	0	0	0	0	0	0	0	0	0	0	0.0334206	0	0	0
69	SRAE_0000059900	0	0	0.0295082	0	0	0	0.0287498	0	0	0	0	0	0	0.0522425
70	SRAE_0000060000	0	0	0	0	0.0332463	0	0	0.0522406	0	0	0	0.045707	0	0.104825
71	SRAE_0000060100	0	0	0.0296794	0	0.0665038	0.0455164	0.0577973	0.0523171	0.0595262	0	0	0.182591	0.0579002	0
72	SRAE_0000060200	0.0353781	0	0	0	0	0.0466422	0.0592654	0.0536467	0	0	0	0.0935596	0.0296818	0.161498
73	SRAE_0000060300	0	0	0.059393	0.0502277	0	0.0452447	0.0289508	0.157258	0	0	0	0.0453786	0.0289772	0.052631
74	SRAE_0000060400	0	0	0	0	0	0	0	0.0520003	0	0	0	0	0	0
75	SRAE_0000060500	0	0	0	0.0505319	0	0.135875	0	0	0.0300268	0	0	0.0454367	0.0292081	0
76	SRAE_0000060600	0	0	0.0295837	0.100438	0	0	0.0574916	0.104049	0	0	0	0	0.0288391	0.0521581
77	SRAE_0000060700	0	0	0.0294204	0	0.0334991	0	0	0	0	0	0	0	0	0
78	SRAE_0000060800	0	0	0.0295476	0	0.0340489	0	0	0	0.0290424	0.0517329	0.0337138	0	0.0278912	0
79	SRAE_0000060900	0.657664	0	0	0	0	0	0	0.0562158	0	0.0528034	0	0.0445133	0.0611482	0.0568022
80	SRAE_0000060950	0.385633	0	0.0928516	0	0.137973	0	0	0.0565742	0.0315017	0.0529548	0.034912	0	0.0610383	0.0569301
81	SRAE_0000061000	0	0	0	0	0	0	0	0	0.0296573	0	0	0	0	0
82	SRAE_0000061100	0	0	0	0	0	0	0	0	0	0	0	0	0	0
83	SRAE_0000061200	0	0	0.0289294	0.106868	0	0	0	0	0	0.054066	0.0329192	0	0.0263662	0
84	SRAE_0000061300	0	0	0.0592361	0.100564	0	0.0458836	0.0287759	0	0	0	0	0	0	0
85	SRAE_0000061400	0	0	0.029653	0	0.0331415	0	0	0	0.0297422	0	0	0	0	0
86	SRAE_0000061500	0	0	0	0	0	0	0	0	0	0	0	0	0	0
87	SRAE_0000061600	0.0390476	0	0	0	0.0336075	0.0462817	0.0290671	0	0.11992	0	0.0674528	0	0	0
88	SRAE_0000061700	0	0	0	0	0	0	0	0	0.0310588	0	0	0	0.0275498	0
89	SRAE_0000061800	0	0	0	0.0536934	0.0344778	0	0	0	0	0	0.0328255	0	0.0266051	0
90	SRAE_0000061900	0	0	0	0	0	0.0889846	0	0	0	0.052121	0	0	0	0
91	SRAE_0000062100	0	0.177413	0.0294486	0.0999563	0	0	0.0286219	0.0518015	0	0	0	0	0.0574198	0.0519404
92	SRAE_0000062150	0	0.139902	0	0	0	0	0	0	0	0	0.0830563	0	0	0
93	SRAE_0000062200	0	0.270078	0	0.0469292	0.0306925	0	0	0	0.0839378	0.0468411	0	0.0408906	0	0
94	SRAE_0000062300	0	0	0	0	0	0	0	0	0	0.0504164	0	0	0	0
95	SRAE_0000062700	0	0.731354	0.0559377	0	0	0	0	0	0	0	0	0	0	0
96	SRAE_0000063300	0.642476	0	0.0152367	0	0.0341723	0	0	0	0	0	0.0342899	0	0.0148611	0
97	SRAE_0000063800	0	0	0	0	0	0	0	0	0	0	0	0	0	0
98	SRAE_0000063900	0	0	0	0	0.0331119	0	0	0	0	0	0	0	0.0306339	0
99	SRAE_0000064000	0	0	0	0	0	0	0	0	0	0	0	0	0	0
100	SRAE_0000064200	0	0	0.029596	0	0	0	0	0	0	0	0	0	0	0
101	SRAE_0000064300	0	0.525561	0.0270258	0.0913228	0.0298634	0	0	0	0	0	0	0	0.0263812	0
102	SRAE_0000064400	0	0.184509	0	0.0496136	0	0.0449945	0.056992	0	0	0	0	0.0451178	0	0
103	SRAE_0000064600	0.182507	0	0.0573841	0	0	0.0973039	0	0	0.032536	0	0.0361531	0	0	0
104	SRAE_0000064700	0	0	0.00670218	0	0	0	0	0	0	0	0.0337857	0	0	0
105	SRAE_0000064900	0	0	0	0	0	0	0	0	0	0	0	0	0	0
106	SRAE_0000065100	0.646534	0	0.015333	0	0	0	0	0	0	0	0.0345065	0	0.014955	0
107	SRAE_0000065200	0	0.0010904	0.0220193	0	0.00659592	0	0	0	0.143571	0.0479574	0	0	0	0
108	SRAE_0000065300	0.56456	0	0	0	0	0	0	0	0	0	0	0.0634434	0.0696144	0
109	SRAE_0000065400	0	0.143872	0	0	0	0	0	0	0.0357762	0	0	0	0	0
110	SRAE_0000065600	0.0370021	0	0.0299828	0.0508444	0.0336477	0	0	0	0.0901971	0.0510076	0.0675198	0.0926337	0.0292418	0.052957
111	SRAE_0000065700	0	0	0	0	0	0	0	0.0520003	0	0	0	0	0	0
112	SRAE_0000065800	0	0	0.0300741	0	0	0	0.0291604	0	0	0	0	0.0440039	0.0586364	0
113	SRAE_0000065900	0	0	0.059254	0.0501386	0	0	0.0577406	0	0.0297158	0	0.0665093	0	0	0
114	SRAE_0000066000	0	0	0.0288364	0	0.034863	0	0	0.0509948	0	0	0	0	0	0
115	SRAE_0000066050	0	0.130434	0	0	0	0	0	0.0601533	0.0344163	0	0	0	0	0
116	SRAE_0000066200	0	0	0	0	0	0.0912726	0	0	0.0298293	0.050558	0.0334419	0.0457654	0.0580283	0
117	SRAE_0000066400	0	0	0	0	0.0342923	0	0.0591543	0	0	0	0	0.0435196	0	0
118	SRAE_0000066500	0	0	0	0	0	0	0	0	0	0	0	0	0.028843	0
119	SRAE_0000066800	0.0377727	0	0.0599038	0.0508091	0	0.0924471	0.203881	0.0527161	0	0	0.033743	0.278053	0.146028	0
120	SRAE_0000066900	0	0	0	0	0	0.0915904	0.201516	0.104205	0.0296887	0.0504145	0	0.0918244	0.173252	0.104488
121	SRAE_0000067000	0	0.244032	0.0468037	0	0	0	0	0	0	0	0	0	0.0721742	0
122	SRAE_0000067100	0	0	0.029616	0	0.0664248	0	0	0.0521757	0.0296991	0	0.0333268	0	0	0
123	SRAE_0000067200	0	0	0.0296841	0	0.0661116	0	0	0.0525688	0.0596161	0.0502761	0.0662619	0	0	0
124	SRAE_0000067300	0.157645	0	0.034028	0.0607575	0	0.102402	0	0	0	0	0.0392773	0.103487	0	0
125	SRAE_0000068300	0	0	0	0	0	0.0457947	0.00123397	0.052126	0	0.100859	0.033396	0	0	0
126	SRAE_0000068400	0.284739	0	0.0144159	0	0	0.0209439	0	0.0266227	0	0	0	0	0.0285206	0.0543588
127	SRAE_0000068500	0.033933	0	0.015307	0.0258995	0	0.186894	0.0149187	0.0540273	0	0	0.017177	0.156199	0	0
128	SRAE_0000068600	0	0.117198	0.092826	0.0552095	0.106243	0.0480948	0.0601179	0	0.0307836	0.11433	0.105438	0	0.0277207	0
129	SRAE_0000069000	0	0.172707	0	0	0	0	0	0	0	0	0	0	0	0
130	SRAE_0000069200	0.0395529	0	0.0297145	0.0504489	0.0668073	0.0920932	0.0577352	0	0.0595627	0	0.0335229	0.0461635	0.0289646	0.0523738
131	SRAE_0000069300	0.757847	0	0	0	0	0	0	0	0	0	0	0.046402	0.0291062	0.0526261
132	SRAE_0000069400	0	0	0	0	0	0.182822	0	0.0522184	0	0	0.0333952	0	0.0867689	0
133	SRAE_0000070000	0	0	0	0.0516028	0.0333239	0	0.0281565	0	0	0.051243	0	0.0432534	0	0.0543893
134	SRAE_0000070100	0	0	0	0.100479	0	0.0889688	0.0584821	0.0529631	0	0	0.0332463	0.089447	0.0583264	0.0533681
135	SRAE_0000070200	0	0.412857	0	0	0	0	0.0278661	0	0	0	0.0318618	0.0431659	0	0.0507185
136	SRAE_0000070300	0	0	0.0876778	0	0.199774	0	0	0.0536913	0.0577183	0.0502626	0.0676136	0	0	0
137	SRAE_0000070400	0	0	0.0286089	0.0499261	0	0	0	0	0	0	0	0	0	0.0543079
138	SRAE_0000070600	0.0362462	0.190476	0.0298694	0.101201	0	0	0.0290827	0.0526474	0.0299546	0.0507704	0	0	0.0291361	0
139	SRAE_0000070700	0	0	0	0	0	0	0	0	0.0296572	0	0	0	0	0
140	SRAE_0000070800	0	0	0	0	0	0	0	0	0	0	0	0	0	0
141	SRAE_0000070900	0	0	0.0291098	0	0.0339498	0	0	0	0	0	0.0333308	0	0	0
142	SRAE_0000071000	0	0	0	0	0	0	0	0	0.0296572	0	0	0	0	0
143	SRAE_0000071210	0	0	0	0	0	0	0	0	0	0	0.0332757	0	0	0.0523416
144	SRAE_0000071450	0	0	0.0295777	0	0.0656263	0	0	0.0527376	0	0	0	0	0.0577631	0
145	SRAE_0000071600	0	0	0.0593156	0	0.099894	0.137339	0.0865152	0	0	0.0504696	0.0334142	0.137692	0.115674	0
146	SRAE_0000071700	0	0	0.0592085	0	0.0998813	0.0459354	0	0.104067	0.118673	0.100838	0	0.0460517	0.0288543	0.156468
147	SRAE_0000071800	0	0	0	0	0	0	0.0574689	0	0	0	0	0	0	0
148	SRAE_0000071900	0	0	0	0.0502686	0	0.0458739	0.143835	0.0520625	0.0593531	0.0504161	0	0.0459904	0.115452	0.052193
149	SRAE_0000072200	0	0.116	0	0.0554131	0.0365212	0.0464167	0.0600655	0.0569986	0	0	0	0	0	0.176104
150	SRAE_0000072700	0.345104	0.140146	0.0365414	0	0	0	0.0349891	0	0.0398478	0	0	0	0	0.141005
151	SRAE_0000073000	0	0	0.0291102	0.0500751	0	0	0.0284024	0	0	0	0	0	0.0286315	0.0542371
152	SRAE_0000073200	0	0	0	0	0	0	0.0290218	0	0.0298252	0	0	0.135394	0.0580238	0
153	SRAE_0000073300	0	0	0.0887839	0	0.0332692	0	0.0575022	0.104067	0.0296612	0.0503927	0.0667756	0	0.0865435	0.0521625
154	SRAE_0000073500	0	0.297945	0	0.095014	0.0311766	0.165036	0	0.102306	0.0567898	0.0479311	0	0.0408611	0	0
155	SRAE_0000073700	0	0	0.0296048	0.100552	0.16647	0	0	0	0	0.0504199	0.10024	0.0460507	0.05771	0.104315
156	SRAE_0000073800	0	0	0	0	0	0.0461079	0	0	0.0298081	0	0	0.0457545	0	0
157	SRAE_0000073900	0	0	0.0282496	0.0522606	0	0	0	0	0.0589103	0.0536087	0.159748	0	0	0
158	SRAE_0000074100	0	0	0	0.100502	0.0664909	0	0.0288587	0	0	0	0.100084	0.0914115	0.0578404	0.0524112
159	SRAE_0000074700	0	0	0	0.00947972	0.0668605	0.154102	0	0	0	0	0	0.130481	0.064653	0.0802589
160	SRAE_0000074800	0	0.353356	0.0590203	0	0.0663265	0.146124	0.0286757	0	0.0316538	0	0.0665615	0	0	0
161	SRAE_0000074850	0	0	0	0	0.0328082	0	0	0	0.0599217	0	0	0	0.0289799	0
162	SRAE_0000074900	0	0	0	0.100219	0	0	0.0290663	0	0	0	0.0331498	0	0	0
163	SRAE_0000075000	0	0	0.0595931	0.10053	0.06641	0	0	0.0527446	0.0346305	0.151444	0.039389	0.0450531	0	0
164	SRAE_0000075300	0	0	0	0	0	0.274966	0	0	0	0.0505485	0	0.321651	0.0593396	0
165	SRAE_0000075600	0.0312828	0	0	0	0	0	0	0	0	0	0.0393574	0	0.0324296	0
166	SRAE_0000075700	0	0	0.0592222	0	0.0332983	0	0	0	0.0593513	0.0504283	0.0334176	0.0460488	0	0
167	SRAE_0000075800	0	0	0	0	0	0	0	0	0	0	0	0	0	0
168	SRAE_0000075900	0	0	0	0	0	0.0466332	0	0	0	0	0	0	0	0
169	SRAE_0000076000	0	0	0	0	0	0	0	0	0	0	0	0	0	0
170	SRAE_0000076100	0	0	0	0.100813	0.0665494	0.0447588	0	0	0.0300677	0	0.0333767	0.0449484	0.0292313	0.0534662
171	SRAE_0000076800	0	0	0.0296095	0.201044	0.0332757	0	0	0	0.0593559	0.0504105	0	0	0	0
172	SRAE_0000077000	0	0	0.118479	0.10055	0.099851	0.0916831	0.115136	0	0.029689	0	0	0.0459583	0.288754	0.0522307
173	SRAE_0000077400	0	0	0.018638	0.0931828	0	0	0	0	0.0511954	0.0404435	0.0630814	0	0	0
174	SRAE_0000078100	0	0	0.0296252	0.0502696	0	0.274708	0.0863963	0	0.0296974	0.0504236	0	0.183608	0.14442	0.0522666
175	SRAE_0000079300	0	0	0	0.109209	0.0334358	0.0484137	0	0	0.025768	0.0568328	0.0300773	0	0	0
176	SRAE_0000079800	0	0.248742	0.0274782	0.128415	0	0.0428714	0.0756043	0	0.0581669	0.0731227	0.0895486	0.129381	0.0413205	0
177	SRAE_0000079900	0	0	0.0957492	0	0.0350092	0.0902789	0	0.052536	0	0.0521939	0	0	0.0505421	0
178	SRAE_0000080050	0	0	0.029254	0	0.0342945	0.0880354	0.144396	0	0.0582867	0.0527648	0.0337669	0.177936	0.0547387	0.112495
179	SRAE_0000080400	0	0	0	0	0	0.0474763	0	0.050379	0	0	0	0	0	0
180	SRAE_0000080600	0	0	0	0.0505468	0	0.0815191	0	0	0.0579979	0	0	0.136185	0.0292263	0
181	SRAE_0000081400	0	0	0	0	0	0	0.0383147	0.0860531	0	0	0	0	0	0
182	SRAE_0000081900	0	0	0	0	0	0	0	0	0	0	0	0	0	0
183	SRAE_0000082000	0	0	0	0	0	0	0	0	0	0	0	0	0	0
184	SRAE_0000082300	0.236756	0	0.0700608	0	0	0	0	0.0537192	0	0.0518866	0	0	0	0
185	SRAE_0000082600	0	0.359109	0.0749048	0	0.0877507	0.0436307	0.0877157	0	0	0.115777	0.082146	0.0165419	0.0583527	0
186	SRAE_0000082700	0	0	0	0	0	0	0	0	0	0	0	0	0	0
187	SRAE_0000529500	0	0	0.0292949	0	0	0	0	0	0.0593466	0	0.098505	0	0	0.0535692
188	SRAE_0000529800	0.861375	0	0	0	0	0.0548313	0	0	0	0	0	0	0	0
189	SRAE_1000000300	0	0	0	0.054313	0	0	0	0	0	0	0	0	0.0267218	0
190	SRAE_1000000750	0	0	0	0	0	0	0	0	0	0	0	0	0	0
191	SRAE_1000006600	0	0.504757	0	0	0	0	0.0310819	0.0574306	0.100935	0	0	0	0.0597491	0
192	SRAE_1000017000	0	0	0.089205	0.100556	0.0664636	0.0452599	0.144991	0.157527	0.0894836	0.0504649	0.0666767	0.090785	0.0870592	0
193	SRAE_1000020300	0	0	0	0	0.0333957	0.0458578	0	0	0	0	0	0	0	0
194	SRAE_1000066800	0	0	0	0	0.0326631	0	0	0.05222	0	0	0.0327436	0	0	0.0540175
195	SRAE_1000072700	0	0	0	0.0505085	0.032935	0	0	0.0542984	0	0	0.0668503	0.0419758	0.0577916	0.0552628
196	SRAE_1000100500	0	0	0	0	0	0	0	0	0	0	0	0	0.0288431	0
197	SRAE_1000140200	0	0	0.14452	0	0.123783	0	0.0677343	0.120213	0	0	0.119625	0.0571401	0.0680811	0.061115
198	SRAE_1000148500	0	0.371441	0	0	0	0	0	0.23173	0.0332091	0	0	0.0504677	0.0606161	0
199	SRAE_1000170900	0	0	0.0593878	0.100684	0	0.0456933	0	0	0.089332	0	0.0334208	0.0916302	0.0579261	0
200	SRAE_1000194000	0	0.248673	0.0961466	0	0.0316809	0.118124	0.0559944	0	0.0666253	0.0483367	0	0	0.0557184	0.0512611
201	SRAE_1000224700	0	0	0	0	0.0591782	0.0881262	0.11818	0.119049	0	0	0.0336068	0.131525	0.0587563	0
202	SRAE_1000254100	0	0.359863	0.0294567	0	0.0661451	0.136412	0.085928	0.0518413	0	0	0	0.091175	0	0
203	SRAE_1000273800	0	0.164066	0.0589229	0	0	0	0.0289471	0.0541556	0.029186	0	0.0342681	0	0	0
204	SRAE_1000280000	0	0.180336	0	0.0999596	0.0661537	0	0.0286509	0.0518566	0	0	0.0663843	0.0455848	0.0287293	0.0520079
205	SRAE_1000300100	0.03745	0	0	0.0524982	0	0	0	0	0	0	0	0	0.0302073	0
206	SRAE_1000305300	0	0	0	0.105193	0.0339653	0.0880364	0.057397	0.1051	0	0	0.0336675	0.0440859	0.109683	0.0554362
207	SRAE_1000322700	0.075519	0.363319	0	0.101034	0.0334341	0.0459734	0.0289529	0	0.0597029	0	0.033551	0.0921826	0.116136	0
208	SRAE_1000332800	0	0.26709	0.188056	0.108677	0.0356879	0	0	0	0.0308976	0	0	0.0454007	0.0606375	0
209	SRAE_1000353400	0	0.362687	0.0307921	0	0.0375523	0.0491839	0.0289389	0	0.0311708	0	0.0349489	0	0	0.0563382
210	SRAE_2000000100	0	0	0.027834	0.0436705	0	0.103046	0.0964212	0.134966	0	0.053223	0.0344169	0.0884458	0.0580411	0
211	SRAE_2000000500	0	0	0	0	0	0	0	0	0	0	0	0	0	0
212	SRAE_2000002900	0	0.36974	0	0.048512	0	0	0	0	0	0	0	0	0.0279456	0
213	SRAE_2000045000	0	0	0	0	0	0.182929	0.11526	0.0521538	0	0	0	0.0458498	0.0577886	0.0523056
214	SRAE_2000048450	0	0	0.0281791	0.157931	0.111399	0.0484164	0.0256671	0.0531478	0.0842957	0.221597	0	0	0.026878	0.0511673
215	SRAE_2000048500	0	0	0.178022	0.155799	0.202502	0.0438664	0.0285631	0	0.231365	0.0518415	0.100622	0	0	0
216	SRAE_2000087300	0	0	0.0593105	0	0.106695	0.0458073	0.0288313	0	0	0	0	0.0918494	0.0289143	0
217	SRAE_2000094400	0	0	0.0598189	0	0	0.0882664	0.0285269	0	0	0.0523665	0	0.0443489	0.0564655	0.0554743
218	SRAE_2000098600	0	0.12116	0.030795	0	0.0366293	0.149195	0.0294842	0.109554	0	0	0.0700842	0.101848	0.0280665	0
219	SRAE_2000110700	0	0	0.117902	0	0	0.142569	0.189173	0.0523226	0.117132	0	0.0334309	0.0501933	0.0539175	0.160755
220	SRAE_2000125900	0	0	0	0	0.0335716	0.0430333	0	0	0.0875467	0.101422	0.034032	0	0	0.0549073
221	SRAE_2000126200	0	0	0	0	0.0328898	0	0	0	0.0300279	0	0	0	0	0
222	SRAE_2000128200	0	0	0	0	0.0332594	0	0	0	0.0297113	0	0	0.0458049	0.0577966	0.0523255
223	SRAE_2000143300	0	0	0.0297173	0	0	0.13512	0.145028	0.0525238	0	0	0	0.135535	0.145031	0.0527615
224	SRAE_2000202700	0	0.258646	0	0	0.0390971	0.106165	0	0	0	0	0	0	0	0
225	SRAE_2000242300	0	0	0	0	0	0	0	0	0	0	0	0	0	0
226	SRAE_2000243800	0	0.176825	0.0598774	0	0.0346995	0.0457148	0.030735	0.0519343	0	0.0514179	0.0666073	0	0.0575758	0.0543573
227	SRAE_2000257900	0	0	0.037689	0	0	0.0455532	0.0324481	0	0.0297911	0	0.0120955	0.0555104	0.0356185	0
228	SRAE_2000290200	0.504847	0	0	0	0.0361661	0	0.095729	0	0	0	0.0362431	0.146012	0.0317866	0
229	SRAE_2000360450	0	0	0	0	0	0.0440548	0	0	0	0	0	0.0438302	0	0.0573081
230	SRAE_2000389000	0	0	0.0593479	0.150818	0.066509	0.045543	0.0288902	0	0.0595161	0.050441	0.0333663	0.137014	0.0289448	0.052479
231	SRAE_2000392800	0	0	0	0	0	0	0	0	0	0	0	0	0	0
232	SRAE_2000405900	0.0794884	0.316049	0	0	0	0.0440311	0	0	0	0	0	0.0876192	0	0
233	SRAE_2000412500	0.0250083	0.131839	0.0709634	0	0	0	0.0345924	0	0	0	0	0.05314	0.066105	0.200464
234	SRAE_2000420200	0	0.539095	0.0293013	0	0	0	0	0	0	0	0.0330065	0	0.0571468	0.0517269
235	SRAE_2000423800	0.359365	0.1885	0	0.0507483	0.0335744	0.0460295	0	0	0	0.0509221	0.101074	0.0461555	0.0584144	0
236	SRAE_2000425650	0	0	0	0	0	0	0	0	0	0	0	0.0922105	0	0
237	SRAE_2000425700	0	0	0	0	0	0	0	0	0	0	0	0	0	0
238	SRAE_2000425800	0	0	0.0296743	0.0499661	0	0.0443258	0.0581379	0.105291	0.029802	0	0.0330865	0	0.0579776	0.106049
239	SRAE_2000427900	0	0	0	0.051104	0.0339454	0.0438126	0.056497	0.0511056	0	0.052343	0.0331792	0.0438634	0	0.0559492
240	SRAE_2000430900	0	0	0	0	0.0667512	0	0	0	0	0	0.0334891	0.0459069	0	0
241	SRAE_2000432200	0	0.181006	0.0294025	0.0997474	0.132021	0	0	0	0.0884449	0.150088	0.198697	0	0	0
242	SRAE_2000436700	0	0.187501	0.0290263	0	0.0325047	0	0	0	0.0873319	0	0	0	0.0283143	0
243	SRAE_2000436900	0	0	0.0288244	0.0535038	0	0.0472893	0.0270227	0	0.0586549	0	0.033145	0.100422	0.0813041	0
244	SRAE_2000437500	0	0	0.0296575	0	0.0664837	0	0	0	0	0	0	0.0456689	0.086783	0.209773
245	SRAE_2000446900	0	0	0	0	0	0	0	0	0	0	0	0	0	0
246	SRAE_2000450100	0	0.540627	0.0291562	0	0	0	0.0283647	0	0	0	0	0	0.0568696	0
247	SRAE_2000450200	0	0.270852	0.0557114	0.0941273	0	0	0.0272493	0	0	0	0.0311255	0.0410078	0	0.10113
248	SRAE_2000455400	0	0.508536	0	0	0	0	0	0	0	0	0	0.0553614	0	0.0599452
249	SRAE_2000457800	0	0.364137	0	0	0.0988887	0.045251	0.0285791	0	0.0589102	0.0499704	0	0	0	0.0518829
250	SRAE_2000459500	0	0	0	0	0	0.0457656	0	0	0	0	0	0.0458886	0.028951	0.104842
251	SRAE_2000459600	0.342744	0	0	0	0	0.0613128	0	0.0684765	0	0	0	0	0	0
252	SRAE_2000459700	0.387098	0	0	0	0	0.0930349	0.0585119	0	0	0	0.0339235	0.0466364	0	0
253	SRAE_2000459800	0	0	0.118471	0.100532	0.133101	0	0	0	0.0890637	0.151253	0.0667856	0	0	0
254	SRAE_2000462000	0	0	0.0296535	0	0.133059	0.136928	0.0288575	0	0.0594725	0.100874	0.133513	0.137293	0.0578459	0.0523934
255	SRAE_2000463050	0	0	0.0295778	0	0	0	0	0	0.0296581	0.100651	0	0	0.115387	0.0522333
256	SRAE_2000463650	0.0743563	0.186589	0	0	0	0	0.0293099	0	0	0	0	0	0	0
257	SRAE_2000463900	0	0	0	0.0502384	0.0328568	0.0876398	0.0290874	0	0.0299521	0	0	0	0.0290255	0.161927
258	SRAE_2000465600	0	0	0.270755	0.0518629	0.13497	0.0433905	0.0292674	0	0.119385	0.15486	0	0.0430725	0.0588984	0
259	SRAE_2000467200	0	0	0.0303309	0	0	0.0450203	0.0584955	0	0	0	0	0.0451619	0	0
260	SRAE_2000469500	0	0	0	0.100545	0.0332761	0.0915728	0	0	0.0296991	0.0504263	0.200359	0	0.0288856	0.10454
261	SRAE_2000471200	0	0	0	0.0503086	0.0332918	0	0	0	0.0297412	0	0.0334035	0.0458468	0.0289274	0
262	SRAE_2000473800	0	0.379399	0.0585391	0	0.0327724	0.0448002	0.0285115	0	0	0.0497259	0	0	0.0571051	0.051802
263	SRAE_2000474450	0	0	0	0	0	0	0	0	0	0	0	0	0	0
264	SRAE_2000477200	0	0	0.0296719	0.100688	0.0999647	0.0458343	0	0	0	0.0504992	0.100315	0.0459517	0	0
265	SRAE_2000477350	0	0	0	0	0	0	0	0	0	0	0	0	0	0
266	SRAE_2000478200	0	0	0.0296917	0.100522	0.0664683	0.0453988	0.11571	0.0523767	0	0.0504338	0.0666767	0.0910719	0.14483	0.0525638
267	SRAE_2000478750	0	0.183691	0	0	0	0.0443118	0	0	0	0	0	0	0.0281623	0
268	SRAE_2000482200	0	0	0	0	0	0	0	0	0	0	0	0	0	0
269	SRAE_2000485700	0	0.202021	0.0302599	0	0	0	0	0	0.0302536	0	0	0	0.0294972	0.109949
270	SRAE_2000486200	0	0	0	0.0512061	0	0	0	0	0	0	0.0335401	0	0.0603633	0
271	SRAE_2000491100	0	0.850856	0.0279909	0	0	0.0419938	0	0	0.0562068	0	0	0	0	0
272	SRAE_2000494100	0.452553	0.187492	0	0	0	0	0	0	0	0	0	0	0	0
273	SRAE_2000498400	0.162665	0	0	0	0.171148	0	0	0	0	0	0.00516715	0.00761573	0	0.322508
274	SRAE_2000504350	0.0244841	0.247967	0.0337121	0	0.155485	0	0.0328936	0.0601527	0.0671754	0.120893	0	0.101419	0.0627201	0.0635557
275	SRAE_2000505300	0	0	0	0	0	0	0	0	0	0	0	0	0	0
276	SRAE_2000506600	0	0	0	0	0.0665239	0.0913971	0.086463	0.10433	0.0297102	0	0	0.137463	0.0577942	0.156953
277	SRAE_2000507650	0.494996	0	0	0.0511967	0.0677648	0	0	0	0	0	0.0680012	0	0.0294282	0
278	SRAE_2000511700	0	0	0	0	0	0	0.0570586	0	0	0	0	0	0.0474417	0
279	SRAE_2000512000	0	0	0.0295978	0.100383	0.0332156	0	0	0.0521217	0	0.100705	0	0	0	0.052277
280	SRAE_2000522400	0	0	0	0	0.0670393	0	0.0571727	0.107179	0	0	0	0.0426423	0.0854301	0.166302
281	SRAE_2000522450	0	0	0	0.0504971	0	0	0	0	0	0	0.0998238	0	0	0
282	SRAE_2000522550	0.413891	0	0.0323956	0	0.0361153	0	0	0	0.0325153	0	0	0	0	0
283	SRAE_2000523200	0	0	0.029582	0	0.0328423	0	0	0.052667	0	0	0	0	0.0288902	0
284	SRAE_2000525000	0	0	0.0292367	0.151208	0.0327922	0	0	0	0.029006	0.0501663	0	0	0	0.109908
285	SRAE_2000525200	0	0	0	0.0538138	0.0170157	0	0.0280849	0.0258883	0.0148403	0	0.0501629	0.0236797	0.0132225	0
286	SRAE_2000525900	0	0	0	0.0538138	0.0170157	0	0.0280849	0.0258883	0.0148403	0	0.0501629	0.0236797	0.0132225	0
287	SRAE_2000526100	0.34778	0	0.0302491	0.204883	0	0	0.0294627	0.106681	0.0303371	0.102788	0.0679733	0	0.0295071	0
288	SRAE_2000526400	0	0.364473	0	0.0584216	0	0.0488936	0	0	0	0	0.0373965	0.0489689	0	0
289	SRAE_2000527900	0	0	0	0	0	0	0	0	0	0	0	0	0	0
290	SRAE_2000528000	0	0	0	0	0	0.0453633	0.0291319	0	0	0	0	0	0	0
291	SRAE_2000529100	0.670015	0.200966	0	0	0	0	0	0	0	0	0	0	0	0
292	SRAE_X000026400	0	0.607482	0.0145518	0	0	0	0.056811	0.051439	0	0.0493593	0.0325872	0.0442656	0.0568127	0.0774972
293	SRAE_X000026500	0	0.863532	0	0	0	0	0	0	0	0	0	0	0	0
294	SRAE_X000026800	0	0	0.0148734	0	0	0	0	0	0	0.0504501	0	0.0452438	0	0.0792098
295	SRAE_X000028833	0	0	0	0	0	0	0	0.0520003	0	0	0	0	0	0
296	SRAE_X000028866	0	0.245882	0	0	0	0	0.0316397	0	0	0	0	0.0995707	0	0.0631753
297	SRAE_X000031600	0	0.409175	0	0	0	0.0881472	0.0568299	0	0.0292052	0	0.065135	0.0884242	0.0568173	0.0516898
298	SRAE_X000031700	0.111803	0	0.0617505	0	0.0343887	0	0.0305711	0.0564231	0.0939609	0.0528693	0.0346899	0	0	0.113486
299	SRAE_X000032850	0	0.26124	0	0	0	0.0468195	0	0.116828	0	0	0	0.0934861	0	0.0607381
300	SRAE_X000033500	0	0	0	0	0	0	0	0	0	0	0	0	0	0
301	SRAE_X000033700	0	0	0	0	0	0	0	0	0	0	0	0	0.0865293	0
302	SRAE_X000033800	0	0.223967	0.0290011	0.0488556	0.0322471	0	0.085108	0.0513934	0.0291178	0.0490727	0	0.174455	0.0566249	0.103445
303	SRAE_X000038200	0	0	0	0	0	0	0	0	0	0	0	0.0452036	0	0.0531572
304	SRAE_X000038700	0	0.433293	0	0.0594704	0.109315	0.0418321	0.0644111	0	0	0.099829	0.0332012	0.0416188	0	0.108833
305	SRAE_X000039900	0.457395	0.195098	0	0	0	0.0465158	0	0	0	0.0515814	0	0	0	0
306	SRAE_X000051600	0	0	0.0895691	0.0503656	0.0998149	0	0	0	0	0.20233	0.0333464	0.0451435	0.0291473	0
307	SRAE_X000051800	0	0.368345	0.0375792	0.0994561	0	0	0	0	0.0294228	0.0498973	0.0990472	0	0.0858503	0.0518569
308	SRAE_X000058600	0	0	0	0	0	0	0	0	0	0	0	0.0461053	0	0
309	SRAE_X000065400	0	0	0	0.0257439	0.0339329	0	0.0558875	0.0530721	0.0286504	0	0	0	0	0
310	SRAE_X000065500	0	0	0	0.0259989	0.0685382	0.217435	0.282206	0.0535978	0	0	0.0336442	0.0435955	0.141249	0.0550991
311	SRAE_X000067600	0	0	0	0	0	0.0912138	0.0288961	0	0	0	0	0.045732	0.0579099	0.052483
312	SRAE_X000072050	0.134927	0	0.0608648	0.0514916	0.0340454	0.0464462	0	0.107414	0.0305265	0.10334	0	0.139746	0.029692	0
313	SRAE_X000074900	0	0	0	0	0	0	0	0	0	0	0.0334987	0.0919955	0	0
314	SRAE_X000075500	0	0.178292	0	0	0	0	0.171589	0	0.0294901	0	0	0.227893	0.0860471	0.103806
315	SRAE_X000077900	0.381094	0.217642	0	0	0.0308423	0.0793225	0	0	0	0.0943668	0	0	0.0269182	0
316	SRAE_X000094550	0	0.366263	0	0	0.033017	0.0453123	0.0572752	0	0.0295112	0	0.0993889	0.0454328	0	0.103984
317	SRAE_X000095200	0	0	0.0446698	0	0.0650365	0	0	0	0	0.441828	0	0.130731	0	0
318	SRAE_X000095400	0	0	0	0	0	0	0	0	0	0	0	0	0	0
319	SRAE_X000100300	0.113389	0	0.060098	0	0	0.0463593	0.0292216	0.105779	0	0	0	0.0464832	0.0586016	0
320	SRAE_X000101400	0	0	0.0882228	0	0.0336582	0.0457098	0	0.0510255	0.0292571	0.0543301	0	0.0902952	0.0263461	0.112665
321	SRAE_X000104800	0	0.269009	0.139546	0	0.06244	0	0.0814172	0	0.0279716	0.0479696	0.0948283	0	0.0276078	0
322	SRAE_X000108550	0	0	0	0	0	0	0	0	0	0	0	0	0	0
323	SRAE_X000117200	0	0.247674	0.0303478	0	0.0369643	0.0497885	0.0569018	0.054891	0	0	0	0.0528646	0.0570674	0
324	SRAE_X000130600	0	0	0.0288868	0.154792	0.333816	0.0445058	0	0	0	0.108206	0.231537	0.0447643	0	0
325	SRAE_X000132300	0	0	0.210137	0.0506321	0.0666549	0.0889812	0	0	0.181622	0.101792	0.0669286	0.0444276	0.0293678	0
326	SRAE_X000133350	0	0	0	0	0	0	0	0	0.0300281	0	0	0.045537	0	0
327	SRAE_X000134700	0.0368135	0	0.209643	0.101567	0.10082	0.0461276	0.116561	0	0.0300326	0.0509475	0.0674364	0.04625	0.0584191	0.0529033
328	SRAE_X000138100	0	0	0.059393	0.0507871	0.0664082	0.173943	0	0.0541853	0.0300516	0	0.0666942	0.128326	0.0294087	0.0549949
329	SRAE_X000140600	0.0564655	0	0.0624783	0.105232	0.0347333	0.0467208	0.0305945	0	0.0627712	0.0528758	0.0348397	0	0	0.11162
330	SRAE_X000141000	0	0	0	0	0	0	0	0	0	0	0	0	0.0576861	0
331	SRAE_X000141100	0	0	0.0298334	0	0	0.0450618	0	0	0	0.0505647	0	0	0.0291192	0
332	SRAE_X000141200	0	0.178092	0	0	0.065555	0	0	0	0	0.049679	0	0	0	0
333	SRAE_X000141300	0	0.261483	0.0242416	0	0	0	0.0475106	0	0	0	0	0	0	0
334	SRAE_X000141400	0	0	0.0477733	0	0.0338129	0	0	0	0	0	0	0	0	0
335	SRAE_X000142900	0	0	0.0296038	0.0502301	0.0332471	0	0.0863397	0	0	0.0503848	0.133454	0	0.0577273	0.0522345
336	SRAE_X000143300	0	0	0.0592897	0	0	0.137406	0.0288197	0.208642	0	0.10091	0.0334102	0.0918388	0	0
337	SRAE_X000146950	0	0	0.0295822	0.0516744	0.0342943	0.0432492	0	0	0.0292246	0	0.0343063	0	0.0287046	0
338	SRAE_X000147100	0	0.668482	0	0	0	0	0	0	0	0	0	0	0	0
339	SRAE_X000153200	0	0	0.0592839	0.0502816	0.0665519	0.137198	0.0864766	0.104345	0.0297172	0.0504396	0.0667804	0.0917101	0.0867113	0
340	SRAE_X000159000	0	0	0	0.0503127	0	0.0915392	0.144211	0	0.0297348	0	0.0334131	0.137661	0.0578417	0
341	SRAE_X000160200	0	0.374542	0	0.180106	0	0.0502443	0	0	0	0	0	0	0.0312995	0
342	SRAE_X000161500	0	0.280872	0.061203	0.052705	0.06934	0.0442885	0.0590701	0	0.029883	0.10474	0.0698516	0	0.029629	0
343	SRAE_X000163500	0.441117	0	0	0.0574184	0.148089	0	0.0314241	0	0.126829	0.057063	0	0	0	0
344	SRAE_X000168650	0	0	0	0	0.102832	0.0445228	0.0578836	0	0.0880162	0	0.0339709	0.0442845	0.0274285	0.113502
345	SRAE_X000169000	0.250669	0.299597	0.0594072	0	0	0	0	0.0536416	0	0	0	0	0	0
346	SRAE_X000169200	0	0	0.0296614	0	0	0	0.0288149	0	0.0295095	0	0	0	0	0
347	SRAE_X000169300	0.0641521	0	0.0474716	0.0411505	0	0	0	0	0	0	0	0	0	0
348	SRAE_X000169400	0	0	0.0295434	0	0.0663295	0.0860536	0	0	0.0295858	0	0.100473	0	0.0292297	0.0554222
349	SRAE_X000173250	0	0	0	0	0	0	0	0	0	0	0	0	0	0
350	SRAE_X000177100	0	0	0.0592876	0.0501888	0.199138	0.0453657	0.0866263	0.104562	0.029731	0.10072	0.033296	0	0.0867531	0.104934
351	SRAE_X000180000	0	0.340514	0	0	0	0.0469087	0	0	0	0	0	0.0458551	0	0
352	SRAE_X000180100	0	0	0.0291886	0	0.03276	0	0.028603	0	0	0	0	0	0	0.0539734
353	SRAE_X000180200	0	0	0.0891613	0.0503131	0	0.0454604	0.0579066	0	0.178852	0.0504858	0.0667495	0.0911908	0.0869805	0
354	SRAE_X000180400	0	0	0.0592735	0	0.0332388	0	0	0	0.0297192	0.100808	0	0.0457147	0.057813	0.104747
355	SRAE_X000180500	0	0.297713	0.027529	0.0469948	0.061693	0.0402766	0.0269953	0	0.0558607	0	0	0	0	0
356	SRAE_X000180600	0.0357525	0	0.0716139	0	0.0339919	0.0465528	0	0	0.0608357	0	0.0341061	0.046684	0.0591729	0
357	SRAE_X000183600	0	0	0	0.0500736	0	0	0.0575813	0.0521223	0.0592992	0	0	0	0	0
358	SRAE_X000199800	0	0	0	0.050263	0	0.130523	0.0874658	0.0538348	0	0.0503593	0	0	0.116375	0
359	SRAE_X000199900	0	0.179438	0	0	0	0	0.0283766	0	0	0	0	0	0.0284498	0.051509
360	SRAE_X000200000	0	0	0.0889157	0.0502945	0.0332917	0.0458153	0	0.0521431	0.0594204	0	0.0334089	0.0918647	0.0577927	0
361	SRAE_X000201300	0	0	0.087989	0	0	0	0	0	0.0299269	0	0	0	0	0
362	SRAE_X000204300	0	0	0.0888714	0	0.0332431	0	0.0576456	0	0.029706	0	0.0333538	0.0457549	0.0288918	0.0523256
363	SRAE_X000208700	0	0.289264	0.0278847	0	0	0.0813601	0.10856	0.101658	0.0561985	0	0.0313692	0	0.110274	0.0516953
364	SRAE_X000212400	0	0	0.0595815	0.0503652	0.0998623	0.0906349	0	0	0.0745737	0	0.0333939	0	0	0
365	SRAE_X000218400	0	0	0	0	0	0	0	0	0.0296573	0	0	0	0	0
366	SRAE_X000218500	0	0	0	0	0	0.0923419	0	0	0	0	0	0.045924	0	0
367	SRAE_X000218700	0	0	0.176708	0.0508139	0	0	0	0	0.0293141	0	0.0672397	0	0	0
368	SRAE_X000221500	0	0	0.0297855	0	0	0.172957	0.0290563	0.054576	0.0296056	0	0	0.170973	0.0878726	0.183122
369	SRAE_X000221900	0	0	0	0	0.0350366	0	0.0546408	0	0	0	0	0	0	0
370	SRAE_X000226100	0	0	0.0929812	0.167151	0.199651	0	0.0693092	0.0520334	0.0641843	0.100798	0.14084	0	0	0.0521609
371	SRAE_X000226500	0	0	0.0296894	0	0.0329967	0	0.0290927	0.0526943	0.0298379	0.0502292	0.0661554	0.0444966	0.0290152	0.0530973
372	SRAE_X000231700	0	0	0	0.0502636	0.0993883	0	0.029287	0	0.0300515	0.10116	0.0664177	0.0891252	0.0583145	0
373	SRAE_X000231800	0	0	0	0	0.0331707	0	0	0	0.029773	0	0	0	0	0
374	SRAE_X000231850	0	0.183127	0.0589301	0	0.0330617	0.136123	0.0286707	0.0518945	0.0590954	0.100246	0	0.0909903	0.057476	0.0520515
375	SRAE_X000232100	0	0	0.0296158	0	0	0.045837	0	0.156261	0	0	0	0	0.0577427	0
376	SRAE_X000232200	0	0	0	0	0	0	0.0286998	0	0	0	0	0	0.057756	0
377	SRAE_X000232300	0	0	0.0296302	0.0502236	0.0664585	0.136712	0.173023	0.104399	0.0297131	0	0	0	0.0577984	0
378	SRAE_X000233200	0	0.351989	0.0295346	0	0	0.091506	0.0286952	0.0519323	0.0296018	0	0	0.0917387	0.0287902	0
379	SRAE_X000233300	0	0	0	0	0	0	0	0	0	0	0	0	0.0288431	0
380	SRAE_X000233400	0.106426	0	0.0905225	0	0	0	0.176272	0.0531831	0.03026	0	0.101779	0.0928629	0.0882997	0.053365
381	SRAE_X000233700	0	0	0.0591882	0.1003	0	0	0.0288064	0	0	0	0.0350771	0	0	0.0564059
382	SRAE_X000233800	0	0	0	0	0	4.06645e-08	0.0573686	6.70309e-09	0	9.88896e-08	4.57953e-09	0	0	0
383	SRAE_X000233900	0.284739	0	0.0144159	0	0	0.0209439	0	0.0266227	0	0	0	0	0.0285206	0.0543588
384	SRAE_X000234000	0.0337202	0	0.015211	0.025737	0	0	0.0148252	0.0536884	0	0	0.0170693	0.0776101	0.0890456	0.215556
385	SRAE_X000234300	0	0	0.0295377	0	0	0	0	0	0.0297158	0	0	0	0	0
386	SRAE_X000234400	0	0	0.0884135	0	0.0343713	0	0.0283049	0	0.0580413	0	0.0337446	0	0	0
387	SRAE_X000234500	0	0	0	0	0	0.0466375	0	0.0522717	0	0	0.0331395	0.0492727	0.0535002	0
388	SRAE_X000234600	0	0	0.0592734	0	0.133194	0.0458497	0.0576061	0	0.0297067	0.0504512	0	0.0459667	0	0
389	SRAE_X000234700	0	0	0.118448	0	0.0332743	0	0.0287769	0.0520814	0.118725	0.0504118	0.066784	0.0459437	0.0288678	0
390	SRAE_X000234800	0	0	0.0696097	0	0	0.0457181	0	0.10443	0.0297361	0.151374	0.133594	0.0458411	0.0578448	0
391	SRAE_X000234900	0	0	0.028943	0	0.141013	0	0	0	0.088344	0	0	0	0.0272129	0.0538114
392	SRAE_X000235000	0	0.19037	0.0294057	0.0497894	0	0.0450154	0.028643	0	0.0589832	0.0499584	0.0330323	0.04515	0.0557614	0
393	SRAE_X000235200	0	0	0	0	0.0166483	0.0458716	0.0143945	0.0260514	0	0	0	0.0229943	0.028882	0
394	SRAE_X000235400	0	0	0	0	0.0166483	0.0458716	0.0143945	0.0260514	0	0	0	0.0229943	0.028882	0
395	SRAE_X000235600	0	0	0	0	0	0	0	0	0	0	0	0	0	0
396	SRAE_X000235800	0	0	0.0408085	0.10055	0.0665654	0.0458344	0.0287862	0	0.0890709	0.0730877	0	0	0	0
397	SRAE_X000235900	0	0.0286396	0.0532407	0.0070703	0.0710438	0.137171	0	0	0.136581	0	0.105071	0	0.0369567	0
398	SRAE_X000236000	0	0	0	0	0	0.0459894	0	0	0	0	0	0	0	0
399	SRAE_X000236100	0.622203	0	0.0337684	0	0.0781215	0	0	0	0.0337465	0.0631636	0.0383756	0	0	0
400	SRAE_X000236200	0.0409024	0	0	0	0	0	0	0	0	0	0	0	0	0
401	SRAE_X000236700	0	0	0.0592205	0.0502224	0.132938	0.0456421	0.0288066	0.0521368	0.029691	0.10076	0	0	0.0577572	0.0522925
402	SRAE_X000236800	0	0	0	0.0502183	0	0.0450596	0.029018	0	0.0298295	0	0	0	0.0290185	0
403	SRAE_X000236900	0	0	0.177621	0.0502684	0.033287	0.0459084	0.028755	0	0.148344	0	0	0	0	0.10433
404	SRAE_X000237000	0	0	0.030067	0	0	0	0.0293718	0	0.0608532	0	0	0.043309	0	0
405	SRAE_X000237300	0	0	0.0592351	0	0.0664965	0	0	0	0.0593858	0.0503978	0	0	0	0
406	SRAE_X000237900	0	0	0.0726451	0	0	0	0	0	0	0	0	0	0	0
407	SRAE_X000238200	0	0	0	0	0	0	0.058075	0.158268	0	0	0	0.044012	0.0288916	0.0531886
408	SRAE_X000239350	0	0	0	0	0	0	0	0	0	0	0	0	0	0
409	SRAE_X000239500	0	0.380489	0	0.0247286	0	0.0223436	0	0.0257655	0.0146508	0.0496269	0	0	0.0142501	0
410	SRAE_X000239600	0	0	0.0296785	0.0501942	0.0331761	0	0	0	0.0595313	0.100739	0.0332815	0	0.0289601	0
411	SRAE_X000239700	0	0.380489	0	0.0247286	0	0.0223436	0	0.0257655	0.0146508	0.0496269	0	0	0.0142501	0
412	SRAE_X000240200	0	0	0.057997	0.107292	0	0	0.0137289	0	0.060472	0.0550299	0.0655931	0	0.033227	0
413	SRAE_X000243700	0	0	0	0	0	0	0	0	0	0	0	0	0	0
414	SRAE_X000246550	0	0	0	0	0	0.0456833	0.0577006	0	0	0	0	0	0.02892	0
415	SRAE_X000248800	0	0.376377	0	0	0.0326592	0.133991	0.0568074	0	0	0	0	0	0.085342	0.0516026
416	SRAE_X000254300	0	0	0	0	0	0	0.0863681	0	0	0	0.0334235	0.092027	0	0

## Sheet: SpRNAseq_discardedGene_counts
File S3. Counts for genes discarded during preprocessing filtering
Low-count genes and associated log2CPM values discarded during preprocessing.
	geneID	flL1L2-ERR1466827	flL1L2-ERR1466828	FLF-ERR1466829	FLF-ERR1466830	FLM-ERR1466831	FLM-ERR1466832	iL3-ERR1466833	iL3-ERR1466834	PF-ERR1466835	pL1L2-ERR1466836
1	SPAL_0000000200	0	0.0554231	0	0	0.0335579	0.05541	0	0	0	0
2	SPAL_0000000500	0	0	0	0	0	0	0	0	0	0
3	SPAL_0000000650	0.0973817	0.055526	0	0	0	0	0.0643946	0.075077	0.0405911	0.065939
4	SPAL_0000000800	0.0973483	0.0542118	0	0.0535259	0.0337471	0.168021	0	0.15475	0	0.0669157
5	SPAL_0000000900	0	0.0449587	0	0	0	0	0.0432752	0.0085724	0	0
6	SPAL_0000001000	0	0	0.0403352	0.0265951	0	0	0	0	0	0
7	SPAL_0000001100	0	0.0809705	0.0397912	0.0539058	0.0675853	0.0281765	0	0	0.0410013	0
8	SPAL_0000001200	0	0.027994	0	0	0	0.0272081	0	0	0	0
9	SPAL_0000001300	0	0.222966	0.0796901	0.0623244	0.0337314	0	0.194897	0.0492388	0	0
10	SPAL_0000001400	0.0981452	0.109685	0.0402758	0.0263714	0.0668689	0.0551168	0.130656	0.0254092	0.0409869	0.201191
11	SPAL_0000001500	0	0.107762	0.0397137	0.0538437	0.0337422	0.0281425	0.0647926	0	0	0.0664174
12	SPAL_0000001600	0	0.0817001	0.0402054	0.0265469	0.0673179	0.0555294	0.13077	0	0.0410487	0
13	SPAL_0000002200	0	0	0	0	0	0	0	0	0	0
14	SPAL_0000002300	0.0971013	0.0540047	0.119685	0	0	0.0277823	0.0649848	0.0512197	0.0408601	0
15	SPAL_0000004500	0	0.0851547	0.0808763	0.133991	0.0658079	0	0.129187	0.0502865	0.0814779	0
16	SPAL_0000004800	0	0	0	0	0	0	0	0	0	0
17	SPAL_0000007700	0	0.155973	0.0405734	0.0529391	0	0.082962	0.262279	0.207755	0	0
18	SPAL_0000008000	0	0.054288	0	0.0269257	0.0338736	0	0	0.0259203	0	0
19	SPAL_0000008200	0	0	0	0	0	0	0.130747	0.0767295	0.0410376	0
20	SPAL_0000008400	0	0.0807422	0	0.134971	0	0	0.0647081	0	0	0
21	SPAL_0000008500	0	0.0618528	0	0.0893099	0.0676485	0.0283101	0	0	0	0.0911487
22	SPAL_0000011200	0	0	0	0	0	0	0	0	0	0
23	SPAL_0000011300	0	0	0	0	0	0.0245658	0.0419398	0	0.128984	0
24	SPAL_0000012000	0	0	0.0614375	0.0420733	0.0164022	0	0.192329	0.441383	0	0
25	SPAL_0000012200	0	0.109241	0	0.0265748	0.0337023	0	0	0.0256373	0.0411236	0.134525
26	SPAL_0000012300	0	0.0286056	0	0.0270064	0	0	0.0637311	0.0248724	0	0
27	SPAL_0000014600	0.0979126	0.218476	0	0.0267551	0	0.0568754	0	0.0258096	0	0
28	SPAL_0000014800	0	0	0	0	0	0	0	0.0773678	0.0825209	0
29	SPAL_0000014900	0	0.0269078	0.0396231	0.0541379	0.0676271	0.056563	0.19402	0.259669	0	0
30	SPAL_0000015200	0	0.0449587	0	0	0	0	0.0432752	0.0085724	0	0
31	SPAL_0000015400	0	0.0274783	0	0.0266151	0	0	0	0.109219	0.0413003	0
32	SPAL_0000015500	0	0.0548464	0	0	0	0	0	0.091738	0	0.0666625
33	SPAL_0000017775	0.0482721	0.242582	0	0	0.0674482	0.0281018	0	0.284261	0.0409337	0.0664705
34	SPAL_0000018600	0	0.0264461	0.0398206	0.0797939	0	0	0.0618813	0.177573	0	0.0729802
35	SPAL_0000021300	0.0481258	0.107667	0.0793093	0.0809999	0.168881	0.0564316	0	0	0.0409324	0
36	SPAL_0000021400	0	0.0271376	0.0400879	0.053237	0.0336663	0	0.130593	0.0256773	0	0
37	SPAL_0000021900	0	0	0	0	0	0	0	0.0260164	0	0
38	SPAL_0000022000	0	0.0647821	0	0.0327381	0	0.0684284	0.234064	0.0790957	0.174098	0
39	SPAL_0000023100	0	0.107717	0	0	0.0338069	0.0565046	0	0	0.737272	0
40	SPAL_0000023300	0	0.168315	0	0.026629	0.0669944	0.110818	0	0	0.0826144	0
41	SPAL_0000023800	0	0.107961	0.0398053	0.0269008	0.0337606	0.196877	0.0649241	0	0	0
42	SPAL_0000023900	0	0.0268858	0	0	0	0	0.0646305	0.145877	0.0442426	0
43	SPAL_0000024000	0	0	0	0	0	0	0.368704	0.505959	0	0
44	SPAL_0000024100	0.0486865	0	0.240242	0.134102	0	0.0280591	0	0.0258369	0	0
45	SPAL_0000031700	0	0.134604	0.158643	0.162025	0.0675625	0.0282202	0.0647239	0.0259239	0.163755	0.0663344
46	SPAL_0000031800	0	0.108374	0	0.0531008	0	0	0	0	0.204745	0.0668897
47	SPAL_0000034200	0	0	0	0	0	0	0	0.0364797	0	0
48	SPAL_0000034300	0	0	0	0	0	0.0283645	0	0	0	0
49	SPAL_0000034400	0	0	0	0.0267655	0.0339315	0	0	0	0.0827641	0
50	SPAL_0000034500	0	0	0	0	0	0	0	0.0259067	0.041073	0
51	SPAL_0000034525	0	0.0268883	0	0	0	0	0	0	0.116331	0
52	SPAL_0000034600	0	0.027771	0	0	0	0	0	0.051948	0	0
53	SPAL_0000034700	0.0486041	0.108777	0	0	0	0	0.129243	0.0251341	0	0.132746
54	SPAL_0000034800	0	0.0825952	0.0404121	0.0528043	0.100206	0	0.196051	0.0762095	0.123211	0
55	SPAL_0000034900	0.0963991	0.115446	0.198536	0.0269849	0.0337848	0.0564072	0	0.129581	0.204805	0
56	SPAL_0000035000	0	0	0	0	0.0338301	0	0	0	0	0
57	SPAL_0000036200	0	0.0186983	0	0.0268759	0	0	0	0	0	0
58	SPAL_0000036400	0.0482355	0.0538	0	0	0	0	0	0.025705	0.144402	0.141756
59	SPAL_0000036575	0	0	0	0	0	0	0.0644801	0	0	0
60	SPAL_0000039100	0	0	0	0	0	0	0	0	0	0
61	SPAL_0000039200	0	0.108048	0.0796855	0.0537997	0.0337741	0.0843811	0.0649767	0.103482	0.04101	0
62	SPAL_0000039300	0	0	0.159857	0.0269556	0	0.0281861	0	0.0520926	0.0411216	0
63	SPAL_0000040600	0.0489184	0.109882	0.0805617	0.0525484	0.0761755	0	0.0650825	0.210946	0.0408608	0.218377
64	SPAL_0000040700	0	0.189473	0.0401763	0.026642	0	0.0278693	0.0654272	0.123034	0.123305	0
65	SPAL_0000040800	0	0.0270425	0	0.0533894	0	0	0.195257	0.0514544	0.122888	0.0667566
66	SPAL_0000041000	0	0.0884861	0.0519119	0.0274337	0	0.0277942	0.0629168	0.263742	0	0
67	SPAL_0000041200	0	0	0	0	0	0	0	0	0	0
68	SPAL_0000041500	0	0.0270182	0	0.0270341	0	0	0	0.0519385	0	0
69	SPAL_0000041600	0	0	0	0.0265933	0	0	0	0	0	0.0674815
70	SPAL_0000041700	0.0962374	0.107687	0.0396545	0.108148	0.169012	0.0565035	0	0.0259475	0	0
71	SPAL_0000043100	0	0	0	0	0	0	0.0651258	0.025759	0	0
72	SPAL_0000043200	0	0	0	0	0	0	0	0	0.0408999	0
73	SPAL_0000043300	0	0	0	0	0.0676598	0	0	0	0	0
74	SPAL_0000043700	0	0	0	0.0271608	0	0	0	0	0	0
75	SPAL_0000044000	0	0.0268691	0.039561	0	0	0	0	0.0259457	0	0
76	SPAL_0000045200	0	0.545769	0.0403049	0.0535022	0.101531	0.195883	0	0.025805	0	0
77	SPAL_0000045300	0	0.108482	0.120209	0.0958379	0.101026	0.0278768	0	0	0.0820513	0.13395
78	SPAL_0000046300	0	0	0	0	0	0	0	0	0	0
79	SPAL_0000046400	0	2.01335e-05	1.16816e-09	5.51627e-09	0	8.63113e-09	0	0	0	0
80	SPAL_0000046700	0	0.0271608	0	0	0	0	0	0.0763092	0	0.0667886
81	SPAL_0000047100	0	0.0538251	0.0794564	0	0	0	0	0	0.378929	0
82	SPAL_0000047400	0	0.135654	0.0400648	0.0529551	0	0	0	0	0.0468351	0
83	SPAL_0000047500	0	0.0536867	0	0	0	0	0	0	0	0
84	SPAL_0000048100	0	0	0	0	0	0	0	0.0118877	0	0
85	SPAL_0000048200	0	0.0272208	0	0	0	0	0	0.0256565	0	0
86	SPAL_0000049300	0	0.107841	0	0.0539609	0.0337913	0	0.0648323	0.181417	0.122931	0
87	SPAL_0000049400	0.0959015	0.107452	0.0395386	0.0813108	0.101421	0.0566224	0	0	0.327232	0.0661391
88	SPAL_0000050900	0	0.0905569	0	0	0	0	0	0.0280636	0.040935	0
89	SPAL_0000051300	0	0	0	0	0	0	0	0	0	0
90	SPAL_0000051400	0	0	0	0.0271608	0	0	0	0	0	0
91	SPAL_0000051500	0	0	0	0	0	0	0	0.0260163	0	0
92	SPAL_0000051700	0	0	0	0	0	0.0281404	0.0650669	0.025888	0.0629288	0
93	SPAL_0000052000	0	0.0685632	0.101046	0.0565882	0.0168375	0.0277268	0.0327956	0.0400932	0.226485	0
94	SPAL_0000052300	0	0.124693	0	0.104693	0	0	0.104693	0.152417	0.0409231	0.0663112
95	SPAL_0000054600	0	0	0	0	0	0	0	0	0	0
96	SPAL_0000057900	0	0.08648	0.161453	0.0272252	0.032535	0	0	0.0249753	0.242237	0
97	SPAL_0000058000	0	0.108412	0.080055	0.133596	0	0	0	0.0257576	0.164164	0
98	SPAL_0000058025	0.04845	0	0	0	0.0336738	0.0279839	0.38985	0.334875	0	0.133283
99	SPAL_0000061100	0	0.15043	0	0	0	0.0280109	0.064964	0.103124	0	0.115503
100	SPAL_0000063150	0	0.0268833	0.0394328	0	0	0	0	0	0	0
101	SPAL_0000063200	0	0	0	0	0	0	0	0.0260163	0	0
102	SPAL_0000063500	0	0.0561455	0	0	0.166285	0.248417	0	0	0	0
103	SPAL_0000063600	0.0483183	0.0805823	0	0	0	0	0	0	0.405012	0
104	SPAL_0000063700	0	0.0268432	0	0	0	0	0	0	0	0
105	SPAL_0000063900	0	0.0280466	0	0.0265712	0.0165533	0	0	0	0.0409111	0
106	SPAL_0000064000	0	0	0	0	0	0	0	0	0	0
107	SPAL_0000064100	0	0	0	0	0	0	0	0	0	0
108	SPAL_0000064200	0	0	0	0	0	0	0	0	0	0
109	SPAL_0000064300	0	0.161135	0.0790364	0.108557	0	0.0283448	0	0.156024	0.0409076	0.0661075
110	SPAL_0000064500	0	0.0505624	0	0.135489	0.0338164	0	0.193809	0.149895	0.0961201	0
111	SPAL_0000065300	0	0	0	0	0	0.0189201	0	0.026002	0	0
112	SPAL_0000065400	0	0	0	0	0	0.0189201	0	0.026002	0	0
113	SPAL_0000065600	0	0.0551688	0	0	0.0050749	0	0.0757512	0.0779272	0.0409066	0
114	SPAL_0000065700	0	0	0.0354463	0	0.0333111	0	0.0574975	0	0	0
115	SPAL_0000065800	0	0.0540295	0.0784824	0	0	0	0	0	0	0
116	SPAL_0000068200	0	0.0269767	0.0795907	0	0.404608	0.169193	0	0	0.0409493	0
117	SPAL_0000068300	0	0	0	0	0	0	0	0	0	0
118	SPAL_0000068400	0	0	0	0	0	0	0	0	0	0
119	SPAL_0000068600	0	0	0	0.053606	0	0	0.0654965	0	0	0
120	SPAL_0000068800	0	0	0	0.0269017	0	0.0280268	0	0.0260539	0	0.136217
121	SPAL_0000072700	0	0	0	0	0	0	0	0	0.0817995	0
122	SPAL_0000072900	0.146733	0.163197	0.0803037	0.159003	0	0.0277185	0	0.255717	0	0.0670408
123	SPAL_0000073075	0	0	0.0627517	0	0.0126291	0	0	0	0.0324246	0
124	SPAL_0000073100	0	0	0	0	0	0	0	0	0.477948	0.0662872
125	SPAL_0000074525	0	0	0	0	0	0	0	0	0	0
126	SPAL_0000074900	0.0488466	0	0.177561	0.220048	0	0.0226875	0	0.0458647	0.0411091	0
127	SPAL_0000075100	0.338004	0.125445	0	0.027325	0.0653733	0.0278251	0	0.106677	0	0.0814009
128	SPAL_0000075200	0	0.0272308	0	0	0	0	0	0.0512939	0	0
129	SPAL_0000075500	0.0487022	0.0828491	0.0402016	0	0.131906	0.0818214	0	0	0	0.0662342
130	SPAL_0000075600	0	0.0276795	0.0401291	0	0	0.0276963	0	0	0.0410217	0
131	SPAL_0000075700	0.145116	0.161344	0.119124	0	0.033246	0	0	0	0	0
132	SPAL_0000075800	0.0965023	0.0808855	0.0794834	0.0269572	0.0337777	0.0281782	0	0.077701	0.122913	0
133	SPAL_0000076200	0.152733	0	0	0	0	0	0.216821	0.0862764	0	0
134	SPAL_0000076300	0	0.0808483	0.0794592	0	0.0674913	0.0281401	0.0648168	0.0258689	0.0409416	0
135	SPAL_0000076400	0	0.0268829	0	0	0	0	0.0646211	0.0518426	0	0
136	SPAL_0000076500	0	0	0	0.162173	0	0	0	0.0519195	0	0.133065
137	SPAL_0000076600	0.0482555	0	0.119195	0.0537088	0	0	0.0648061	0.154924	0	0
138	SPAL_0000076700	0	0.107586	0.0792143	0.0270543	0.0337973	0	0	0	0	0
139	SPAL_0000076800	0	0	0	0	0	0	0	0	0.327199	0
140	SPAL_0000077000	0	0	0	0	0	0	0	0	0	0.0660649
141	SPAL_0000077900	0.0481195	0.177158	0	0.0810051	0.101327	0	0.129414	0.182481	0	0
142	SPAL_0000078700	0	0.0269016	0.0793827	0	0	0	0.258869	0.437505	0	0
143	SPAL_0000079700	0	0	0	0	0	0	0	0	0	0
144	SPAL_0000079800	0.0483476	0.0600653	0.0397796	0	0.0547641	0.0558903	0.324244	0.257221	0.0408747	0.0665067
145	SPAL_0000079900	0	0	0	0	0	0.0283646	0	0	0	0
146	SPAL_0000080000	0	0.0263908	0	0	0	0	0	0	0	0
147	SPAL_0000080100	0	0.143607	0	0	0	0.0283075	0.212188	0.129892	0.0486126	0.0661495
148	SPAL_0000082400	0.048136	0.0269194	0.039661	0.0269924	0.067546	0.0282085	0	0.10366	0.0409329	0.0663346
149	SPAL_0000082600	0	0.0539277	0.0796613	0	0	0	0.389292	0.204184	0	0
150	SPAL_0000082700	0	0.108215	0	0.0269958	0.0338593	0	0	0.0259496	0	0
151	SPAL_0000083200	0	0.0268432	0	0	0	0	0	0	0	0
152	SPAL_0000083300	0	0.0250834	0.0358696	0	0	0	0	0	0	0
153	SPAL_0000084700	0.0638401	0.194995	0	0.0430242	0	0.0453995	0	0.0721478	0.0640523	0
154	SPAL_0000085700	0	0	0	0	0.0338737	0	0	0.0259827	0	0
155	SPAL_0000086000	0.144957	0.0269586	0.159097	0.0804316	0	0.0280365	0.0648532	0.154765	0.163671	0.0665061
156	SPAL_0000086100	0	0	0	0	0	0	0.0645605	0	0.0815548	0.0661811
157	SPAL_0000086200	0	0	0	0	0	0.0280252	0	0.0258172	0.020172	0.134053
158	SPAL_0000086300	0	0.0275982	0	0	0	0	0	0.103228	0	0
159	SPAL_0000087100	0	0.134498	0.0396423	0	0.0337199	0	0	0.0775915	0.204436	0.0663005
160	SPAL_0000087900	0	0	0	0	0.0337304	0	0.131109	0.0513346	0	0
161	SPAL_0000088800	0	0.0269804	0	0	0	0	0	0.0517685	0	0
162	SPAL_0000088825	0	0.0577319	0	0	0	0.0277519	0	0.0250094	0	0.0654152
163	SPAL_0000090100	0	0.0977677	0	0.048108	0.0836034	0.106716	0	0.103862	0.0340292	0
164	SPAL_0000090400	0	0.161778	0	0.0540031	0.0338062	0	0	0	0.0409874	0
165	SPAL_0000090600	0	0.134669	0.039747	0	0.100893	0.0839213	0.0648016	0	0.040867	0.0664557
166	SPAL_0000090900	0	0.0859289	0	0	0	0	0.0972688	0.0367729	0	0.0661002
167	SPAL_0000091600	0	0	0.0197459	0	0	0	0	0	0	0
168	SPAL_0000091700	0	0.026883	0.0792655	0	0	0	0	0.0258016	0	0.066281
169	SPAL_0000096900	0	0	0	0	0	0	0.064544	0	0.0408594	0
170	SPAL_0000097100	0	0	0	0	0	0	0	0	0	0
171	SPAL_0000097300	0	0.0269904	0.0397945	0	0.0129245	0.0281648	0	0.0517895	0	0
172	SPAL_0000097400	0	0	0.0394917	0	0	0	0	0	0	0
173	SPAL_0000098450	0.0483989	0.0850829	0.0400894	0	0	0	0	0.0496721	0.0804417	0.0650244
174	SPAL_0000098500	0	0.0278251	0	0	0.0655967	0	0.128692	0	0	0.065905
175	SPAL_0000098900	0	0.0752259	0	0.0270928	0	0	0.106704	0	0.190142	0
176	SPAL_0000099000	0	0	0	0	0	0	0	0	0	0
177	SPAL_0000099100	0	0	0	0	0	0	0	0	0	0
178	SPAL_0000099500	0	0	0	0	0	0	0	0	0	0
179	SPAL_0000099600	0	0	0	0	0	0	0	0.0206834	0	0
180	SPAL_0000099800	0	0.0404225	0	0	0.0167512	0	0.0324289	0	0	0
181	SPAL_0000100200	0	0	0	0	0	0	0	0	0.69399	0.0661896
182	SPAL_0000100300	0	0.0249154	0	0.00800715	0	0	0.0454524	0	0	0
183	SPAL_0000100400	0	0	0	0	0.0337215	0	0	0.0527633	0.0819775	0.0666782
184	SPAL_0000100500	0	0	0	0	0	0	0	0	0	0
185	SPAL_0000101100	0	0.0807838	0	0.0541463	0.0338289	0	0	0.0519497	0.122911	0
186	SPAL_0000101500	0	0.026927	0	0	0.0673639	0	0.323861	0.46451	0.0408886	0.066408
187	SPAL_0000101800	0	0.0270363	0	0.0540686	0.101618	0.0282587	0	0	0	0
188	SPAL_0000101900	0	0.107466	0	0.0814365	0.0676701	0.0850551	0	0	0	0
189	SPAL_0000102000	0	0.0268597	0	0	0	0	0	0	0.122625	0
190	SPAL_0000102100	0	0.0537035	0.0792029	0	0	0	0	0	0.0815472	0
191	SPAL_0000102200	0	0.0268344	0.0395046	0	0	0	0	0	0	0
192	SPAL_0000102300	0.0478771	0	0	0	0	0	0	0	0	0
193	SPAL_0000102400	0	0	0	0	0	0	0	0.0260164	0	0
194	SPAL_0000102500	0	0	0.0396082	0	0	0.0565913	0	0.129881	0.0409425	0
195	SPAL_0000105300	0	0	0	0.0431595	0	0	0	0	0.160069	0
196	SPAL_0000105400	0	0.108122	0	0.0375861	0.0677595	0.028275	0	0.0779543	0	0
197	SPAL_0000105500	0	0.13487	0	0	0	0	0	0.0517805	0	0
198	SPAL_0000105600	0	0	0	0	0	0	0	0	0	0
199	SPAL_0000105800	0	0.0268092	0.0395418	0	0	0	0	0	0	0
200	SPAL_0000105900	0.0480504	0	0.0791971	0	0.0675128	0	0	0.0862813	0.252588	0
201	SPAL_0000105975	0.0947657	0.0879282	0	0.0573963	0	0.0293248	0.240565	0.408903	0	0.0655931
202	SPAL_0000106100	0.196502	0.168807	0	0.0266488	0	0.0550911	0	0.151527	0	0.199552
203	SPAL_0000107000	0.0978588	0.138948	0.0403666	0.158114	0.0330718	0	0.0648386	0.0755119	0.0408144	0.0664834
204	SPAL_0000113100	0.0480603	0.134408	0.0396017	0.0269704	0.134943	0	0.0646283	0	0.0817618	0
205	SPAL_0000113200	0.192757	0.0538458	0.039688	0.0269029	0.0337192	0	0	0.0258519	0.0409064	0.0663743
206	SPAL_0000113400	0	0	0	0	0	0.0282141	0.0647498	0	0.040947	0
207	SPAL_0000113500	0	0	0	0	0	0	0	0	0	0
208	SPAL_0000114033	0	0	0	0	0.0335773	0	0.0649934	0	0.0408829	0
209	SPAL_0000114066	0	0.0809855	0	0	0	0	0	0.0258251	0.0409713	0
210	SPAL_0000114100	0	0.026796	0.0395596	0	0	0	0.0644832	0	0	0
211	SPAL_0000114200	0	0	0	0	0	0	0	0.0260163	0	0
212	SPAL_0000114533	0	0	0	0	0	0	0	0	0.0817996	0
213	SPAL_0000114566	0	0.0822645	0.040383	0.0529977	0.0336283	0	0	0.051091	0.0411407	0
214	SPAL_0000115300	0	0	0	0	0	0	0	0	0	0
215	SPAL_0000116200	0	0	0	0	0	0	0	0.0260164	0	0
216	SPAL_0000123500	0.0483192	0	0.119383	0.0269715	0	0.0281947	0	0.0780544	0	0
217	SPAL_0000123625	0.0494219	0	0.04074	0.0796895	0.268505	0.0554464	0	0.332002	0.0413076	0
218	SPAL_0000124000	0	0.142619	0.0811495	0	0.032966	0.0552742	0	0.100794	0.0408193	0
219	SPAL_0000124100	0	0	0	0	0	0	0	0.0260162	0	0
220	SPAL_0000129300	0	0.0543153	0.361131	0.0801872	0.236268	0.0839109	0	0	0.123314	0
221	SPAL_0000129425	0	0	0	0	0	0	0	0	0	0
222	SPAL_0000130000	0	0.0806072	0.0396964	0	0	0	0	0	0.0406499	0
223	SPAL_0000130100	0	0	0	0	0	0	0	0	0	0
224	SPAL_0000130200	0	0.0547478	0.0414752	0.0571663	0	0	0.328996	0.19211	0	0
225	SPAL_0000130300	0	0.0537803	0.0411896	0.108039	0.0337654	0	0	0	0.126699	0.0662465
226	SPAL_0000130400	0	0	0	0.0543216	0	0	0	0	0	0
227	SPAL_0000130700	0	0.105549	0.0532266	0.0751885	0.0108946	0	0.0735439	0.459676	0.0409361	0.0667332
228	SPAL_0000131800	0	0.0578438	0.0791011	0.0363534	0	0	0.133149	0.351005	0	0.198473
229	SPAL_0000131900	0	0	0	0	0	0	0	0	0	0
230	SPAL_0000132075	0.0488294	0	0	5.41764e-08	0	0	0	0	0	0
231	SPAL_0000132100	0	0	0	0	0	0	0	0	0	0
232	SPAL_0000132200	0	0	0	0	0	0	0.194054	0.129202	0	0.0663052
233	SPAL_0000132300	0.104328	0.0761883	0.0403736	0.0595168	0.138194	0.0880346	0	0.0572417	0	0.392973
234	SPAL_0000132500	0.0959192	0.0537292	0.0790873	0.0270935	0.101405	0	0.0645534	0.0463619	0	0
235	SPAL_0000132600	0	0	0	0.0243644	0.0191889	0	0.131222	0	0	0
236	SPAL_0000133000	0	0	0	0.219678	0	0.028491	0	0	0	0
237	SPAL_0000133100	0	0	0	0	0	0	0	0	0	0
238	SPAL_0000133125	0	0.0269334	0.0397369	0	0.0336543	0	0	0.0515402	0.0408795	0.0664439
239	SPAL_0000133200	0	0.108727	0.0397427	0	0.0680339	0.112513	0.259335	0.129306	0.040944	0
240	SPAL_0000135100	0	0.0544435	0	0.0267842	0	0	0	0	0	0
241	SPAL_0000135400	0	0.0850911	0	0.0268531	0.19947	0.05547	0	0.0254109	0.0412495	0.200761
242	SPAL_0000136000	0	0.0273637	0	0.026808	0	0	0	0.724069	0	0
243	SPAL_0000136100	0.0479447	0.161165	0	0.0271062	0.0676143	0	0.0645402	0.0259818	0	0.132265
244	SPAL_0000136200	0	0.214935	0.0790874	0.0542182	0.202876	0	0.112125	0.097863	0.122731	0
245	SPAL_0000137300	0.0969555	0.0810491	0	0.0267622	0.0336888	0	0.06501	0.05154	0.0819316	0
246	SPAL_0000137400	0.0487631	0	0.0402779	0	0	0	0.257832	0.0751932	0	0
247	SPAL_0000137500	0.0964906	0.10772	0.03972	0.0536502	0	0	0.0647825	0.0515939	0.0817755	0
248	SPAL_0000138200	0	0.0269797	0.03984	0	0	0	0	0.0256756	0.0817489	0
249	SPAL_0000138300	0	0.0272348	0	0.0266631	0	0	0.13101	0.0257172	0	0
250	SPAL_0000140600	0	0.161532	0.19835	0.026973	0	0	0.194205	0.0259019	0	0
251	SPAL_0000140700	0	0.188453	0.0396658	0.0269892	0.13509	0	0.19419	0.114264	0.0409346	0
252	SPAL_0000140800	0	0	0	0	0	0	0	0.0259293	0.0410372	0
253	SPAL_0000141500	0	0.0932724	0.0398679	0.0535208	0	0	0	0.0257679	0	0.0666577
254	SPAL_0000141625	0	0	0	0	0	0	0	0	0.0408999	0
255	SPAL_0000142600	0	0.0282469	0	0	0	0	0	0.0247362	0	0
256	SPAL_0000143900	0	0.0813245	0	0	0	0.0843089	0	0.0258684	0.0411127	0
257	SPAL_0000144500	0	0.108403	0.156004	0.087167	0.0612263	0.0295094	0	0	0	0
258	SPAL_0000145000	0.0478773	0	0	0	0	0	0	0	0	0
259	SPAL_0000145025	0.0482598	0.401737	0.0402115	0.0811989	0.129518	0.0551001	0.0636094	0	0	0
260	SPAL_0000146100	0	0.0268432	0	0	0	0	0	0	0	0
261	SPAL_0000146200	0	0	0	0	0	0	0	0	0.0408998	0
262	SPAL_0000146400	0.0478772	0	0	0	0	0	0	0	0	0
263	SPAL_0000146500	0	0.0273484	0	0.0523765	0	0	0	0.0258672	0	0
264	SPAL_0000146600	0	0	0	0	0	0	0	0	0	0
265	SPAL_0000146700	0.14431	0	0.30979	0.185094	0	0.084621	0	0	0	0.0662945
266	SPAL_0000146900	0.0975841	0.135597	0.120168	0.0265068	0.0671557	0.110931	0.195575	0	0.163735	0
267	SPAL_0000147100	0	0	0	0	0	0	0	0	0	0
268	SPAL_0000147125	0	0	0	0	0	0	0	0	0	0
269	SPAL_0000147275	0	0.0293116	0	0	0	0	0	0.0649798	0.0421705	9.01803e-08
270	SPAL_0000147900	0.0963463	0	0.0883714	0.0538819	0.0337439	0	0	0.0692361	0.293476	0.199096
271	SPAL_0000148000	0.0796448	0.033532	0	0.11516	0.0587347	0	0.0646157	0.0477714	0.120864	0.162679
272	SPAL_0000148500	0	0	0	0	0	0	0	0.033564	0	0
273	SPAL_0000148700	0	0.0540737	0.0797526	0	0.0332658	0	0	0	0	0
274	SPAL_0000148800	0	0	0	0	0	0	0	0	0.1227	0
275	SPAL_0000148900	0.0247444	0	0	0.0133947	0	0.0280148	0	0.0258443	0	0
276	SPAL_0000161650	0	0.141161	0	0	0.033383	0.055421	0	0.0508974	0.0825543	0
277	SPAL_0000174100	0	0.0288083	0.0403376	0.0816237	0	0.0276965	0	0.049919	0.121042	0.0652846
278	SPAL_0000174600	0.0892527	0.133916	0	0	0	0	0	0	0	0
279	SPAL_0000176300	0	0	0	0	0	0	0	0	0	0
280	SPAL_0000180200	0	0.0278651	0	0	0	0	0	0.0250692	0	0
281	SPAL_0000180400	0	0.837032	0	0.0270465	0	0	0	0.0519477	0	0
282	SPAL_0000180500	0	0.177145	0	0	0.0287296	0	0.095385	0.158886	0.182321	0
283	SPAL_0000180600	0	0	0	0	0	0	0	0	0	0
284	SPAL_0000180900	0	0.0270549	0.119642	0	0.0332401	0	0	0	0	0
285	SPAL_0000181000	0	0	0	0	0.0403258	0	0	0.165366	0	0
286	SPAL_0000181100	0	0.107563	0.197984	0.297622	0	0.0282681	0.064631	0	0.122762	0
287	SPAL_0000181300	0.18448	0.180062	0	0.0431437	0.000798183	0	0	7.54872e-05	0	0.0714347
288	SPAL_0000181500	0	0	0	0	0.0113074	0.00942911	0	0	0	0
289	SPAL_0000181600	0	0	0	0	0.0113074	0.00942911	0	0	0	0
290	SPAL_0000185175	0.0490974	0.0548392	0	0	0	0.0276005	0	0.0685031	0.0633708	0
291	SPAL_0000185450	0	0.0269334	0	0	0	0	0	0	0.375898	0.0331818
292	SPAL_0000186200	0	0	0	0	0.0338509	0	0	0.884515	0	0
293	SPAL_0000188200	0.0978351	0.217526	0.160607	0.132643	0.100886	0.111017	0	0.0511998	0.0410109	0.067053
294	SPAL_0000188300	0	0.13664	0.0410973	0.111161	0	0	0	0.133358	0.0853087	0
295	SPAL_0000188400	0.048428	0.107964	0.0796819	0.121234	0	0	0	0.0772585	0	0
296	SPAL_0000188500	0.0242442	0.0404646	0.0597865	0	0.167636	0	0	0.0384053	0.142907	0
297	SPAL_0000189550	0	0	0	0	0	0	0	0	0	0
298	SPAL_0000190900	0	0	0	0	0	0	0	0	0	0
299	SPAL_0000191000	0	0.0537401	0	0	0.0337961	0	0	0	0	0
300	SPAL_0000191100	0	0.135179	0.0399145	0	0.13477	0.0279799	0	0	0	0
301	SPAL_0000191400	0	0.0540802	0	0.0540183	0.225728	0.254112	0	0.030225	0.123238	0
302	SPAL_0000191850	0	0	0	0	0	0	0	0.0260163	0	0
303	SPAL_0000192400	0	0	0	0	0.0765136	0.179387	0.105878	0.159055	0	0
304	SPAL_0000192500	0	0	0	0	0	0	0	0	0	0
305	SPAL_0000192600	0	0.0275164	0	0	0	0.0279354	0	0.0257731	0	0
306	SPAL_0000195700	0	0.0275181	0.0401679	0.0261594	0	0	0	0	0.0406334	0.0662566
307	SPAL_0000197400	0	0.0811051	0.0399135	0	0.101075	0.139896	0	0.0515252	0	0.133457
308	SPAL_0000197500	0	0.108565	0.120292	0.0801552	0.0674759	0.139797	0.0653247	0.0257636	0.0410829	0
309	SPAL_0000204800	0.0486904	0.108322	0	0.0266328	0.0336424	0	0.130338	0.0256887	0.122939	0
310	SPAL_0000204900	0	0.0811373	0	0.0269858	0	0.0282127	0	0	0.0410778	0
311	SPAL_0000206600	0	0	0	0	0	0	0	0	0.0408999	0
312	SPAL_0000206800	9.455e-06	0.076421	0.0490555	0.0269288	0	0	0.216969	0.610598	0	0
313	SPAL_0000207100	0	0.0554883	0	0	0	0	0	0	0	0
314	SPAL_0000210200	0.0961039	0.0537825	0.0396038	0.0540617	0.067559	0.0282435	0.193917	0.121054	0.047088	0.132485
315	SPAL_0000210700	0	0	0	0.0416213	0	0.0283156	0	0.0743797	0	0
316	SPAL_0000210800	0	0.111858	0.0796783	0	0	0	0	0.0247708	0	0
317	SPAL_0000210900	0	0	0	0.0814825	0	0	0	0	0	0
318	SPAL_0000211100	0.388553	0.0269956	0.0797458	0	0.100273	0	0	0.025453	0.244481	0.133251
319	SPAL_0000212550	0	0.108095	0.0399063	0.0266705	0.0672733	0	0.0650402	0.128526	0.0409323	0.20013
320	SPAL_0000233000	0.0484775	0.16192	0	0	0.0332454	0	0.129309	0	0.0405936	0.0663718
321	SPAL_0000246500	0	0.0270148	0.0398943	0	0	0.0278909	0	0	0.654664	0
322	SPAL_0000246700	0	0.108181	0	0.107722	0	0.0281593	0.0650574	0.113957	0.290187	0
323	SPAL_0000247100	0.0481063	0.0268722	0	0	0	0	0	0.128956	0	0.132509
324	SPAL_0000248000	0	0.361673	0	0.0844498	0.170452	0	0	0.0358502	0.156602	0.0665547
325	SPAL_0000252200	0	0	0	0	0	0	0	0	0	0
326	SPAL_0000252500	0	0.107373	0	0	0	0	0	0	0	0
327	SPAL_0000252800	0	0.0134845	0	0	0.016836	0	0	0	0	0
328	SPAL_0000252900	0	0	0	0	0	0	0	0.0128584	0.806861	0
329	SPAL_0000253200	0.240435	0.134537	0	0.0270341	0	0	0	0.0524513	0.0409328	0
330	SPAL_0000253600	0	0	0	0	0	0	0	0	0	0.0519851
331	SPAL_0000255020	0	0.0269532	0	0.0269698	0	0	0	0.0518147	0.0409649	0.0664366
332	SPAL_0000255060	0	0.0268426	0	0	0	0	0.12912	0	0.0407793	0.06618
333	SPAL_0000255080	0	0	0	0	0	0	0	0	0	0
334	SPAL_0000256175	0	0	0	0	0.0340296	0.056661	0	0	0	0
335	SPAL_0000256200	0	0	0	0	0	0	0	0	0	0
336	SPAL_0000256400	0	0	0.0792905	0	0	0	0	0	0.0515139	0
337	SPAL_0000256600	0.0478772	0	0	0	0	0	0	0	0	0
338	SPAL_0000256700	0.0980124	0	0.121254	0.0264288	0.066107	0	0.129712	0	0.0817144	0
339	SPAL_0000257000	0	0.0453899	0	0	0.0337884	0	0	0.0259254	0.0409541	0
340	SPAL_0000257100	0.294845	0	0	0	0.0333453	0	0.130776	0.116654	0	0
341	SPAL_0000263000	0	0	0	0	0	0	0	0	0	0
342	SPAL_0000269200	0.145607	0.0874825	0.0398526	0.0657314	0	0	0	0	0	0.0664661
343	SPAL_0000278700	0	0.0811526	0.0798633	0.133939	0.0337264	0.0280219	0	0	0	0.066759
344	SPAL_0000279300	0	0	0	0	0.0364287	0.0309594	0	0.0704196	0.151839	0
345	SPAL_0000279500	0	0.0537178	0.158118	0.0542263	0	0.02832	0.129066	0	0.16361	0.0661247
346	SPAL_0000279800	0.0960154	0.107434	0	0	0	0	0.0645672	0.12942	0.0408534	0.198515
347	SPAL_0000281400	0	0.114848	0.0405826	0.0403762	0.190753	0.041488	0	0.141774	0.0400189	0.0755636
348	SPAL_0000295200	0	0	0	0.342559	0	0	0	0	0	0
349	SPAL_0000308500	0	0.0543688	0.0401571	0.0799932	0.0337244	0.055794	0	0.0515519	0.0822087	0.0671207
350	SPAL_0000308600	0.0490593	0.109473	0	0.0528556	0	0.0276161	0.130751	0.101909	0.0410395	0.0670906
351	SPAL_0000321200	0.0483131	0.134664	0.0397527	0.0534148	0	0	0.194419	0.128562	0.122555	0.0664622
352	SPAL_0000323000	0.0966535	0.0269686	0.0397835	0	0.0674147	0.0280615	0	0.0516291	0.573118	0
353	SPAL_0000323350	0	0	0	0	0	0	0	0	0.736198	0
354	SPAL_0000325300	0	0	0	0	0	0	0	0	0	0
355	SPAL_0000325600	0	0	0	0	0	0	0	0	0	0
356	SPAL_0000325700	0	0	0	0	0	0	0	0.1166	0	0
357	SPAL_0000326100	0	0	0	0	0	0	0	0	0	0
358	SPAL_0000326200	0.0480455	0.0806486	0.0395955	0.027005	0	0	0.129246	0.0259151	0.368047	0
359	SPAL_0000326400	0	0.108325	0	0	0	0.0281279	0	0.0258846	0.041091	0
360	SPAL_0000326500	0	0.117308	0.0400173	0	0.133959	0	0.130151	0.260536	0.0408476	0
361	SPAL_0000326575	0	0.0270426	0.0399414	0	0	0	0	0.0255358	0	0
362	SPAL_0000326600	0	0.0270509	0	0	0.0335657	0	0	0	0.040906	0
363	SPAL_0000326700	0	0	0	0	0	0	0	0	0	0
364	SPAL_0000327000	0.135763	0.00302012	0.0976298	0.00714946	0.00157492	0	0	0	0.0624412	0.235507
365	SPAL_0000328132	0	0.0273083	0	0.0268645	0.101788	0.0843276	0	0	0	0
366	SPAL_0000328300	0	0.0843579	0	0	0.0330725	0	0.0649449	0.0345552	0	0
367	SPAL_0000328700	0	0.181787	0	0.0413113	0	0.0282984	0.16564	0.0281866	0.180188	0
368	SPAL_0000328800	0	0.0909449	0	0.10418	0	0.0282787	0	0.049903	0	0
369	SPAL_0000328900	0.149337	0	0	0	0	0	0	0	0	0
370	SPAL_0000329400	0	0	0	0	0	0	0	0.765395	0	0
371	SPAL_0000331300	0	0	0	0	0.0680044	0.0283286	0	0	0	0
372	SPAL_0000331400	0.162878	0.0181092	0.0935929	0.0264912	0.0447783	0.0184743	0.0434856	0.0596489	0.150179	0.11162
373	SPAL_0000331500	0.0490296	0.0136328	0.0603738	0.0265647	0.0505258	0.0416786	0	0.0640842	0.102711	0
374	SPAL_0000332000	0.000292477	1.4717e-07	0.519474	0	5.95586e-08	0	0	0	0.000398669	8.71697e-10
375	SPAL_0000332225	0	0	0	0.0269379	0.0341104	0	0	0	0	0
376	SPAL_0000332775	0	0.055768	0	0	0	0	0	0.0206149	0.394263	0.0762098
377	SPAL_0000335700	0	0	2.27493e-06	0.0655436	0	0	0	0	0	0
378	SPAL_0000335800	0	0.0954301	0.0797272	0	0.0336919	0.0560084	0	0	0.0409611	0
379	SPAL_0000338800	0	0	0	0	0	0	0	0	0	0
380	SPAL_0000338900	0	0	0	0	0	0	0	0	0	0
381	SPAL_0000338975	0	0	0	0	0	0	0	0	0	0
382	SPAL_0000339100	0	0.107496	0	0	0.0674457	0	0.129222	0	0	0
383	SPAL_0000339200	0	0	0	0	0	0	0	0	0	0
384	SPAL_0000339300	0.0480243	0.161314	0	0.02706	0.033794	0	0.193851	0.0259551	0.081832	0
385	SPAL_0000339500	0.0486485	0.09275	0.0804492	0.187281	0.0326821	0.0547868	0	0	0	0
386	SPAL_0000339675	0.0967948	0.0538516	0.198915	0	0.0669288	0	0.129607	0.0766668	0.20377	0.0664868
387	SPAL_0000339700	0.0479621	0.0268583	0.0395411	0.0541191	0.0675531	0	0.0645449	0	0.0408837	0.0661411
388	SPAL_0000339875	0	0	0	0.027161	0	0	0	0	0	0
389	SPAL_0000339900	0.0485726	0.027001	0.119672	0.0264526	0.0334801	0	0	0	0.163238	0.133341
390	SPAL_0000340000	0.0487924	0	0	0	0.0336515	0	0	0.102664	0	0
391	SPAL_0000340100	0.0483657	0.0807854	0.0397681	0	0.0670232	0	0.064815	0.102428	0	0
392	SPAL_0000340200	0	0.0856544	0	0.0270349	0	0.0276641	0	0.0252229	0	0
393	SPAL_0000341825	0	0	0	0	0	0	0	0	0.427554	0
394	SPAL_0000342000	0	0.0343438	0	0	0	0.0361988	0.0722311	0.0324774	0	0
395	SPAL_0000343700	0	0.0550026	0	0	0	0	0.0639271	0	0.040272	0
396	SPAL_0000344000	0.0524923	0.0715776	0.126326	0.115075	0.036517	0.028292	0.254881	0.273142	0	0
397	SPAL_0000344100	0.0481805	0.0807977	0.11907	0.0808911	0.0675266	0.0281822	0	0.0517957	0.0818771	0.132762
398	SPAL_0000346000	0	0.0908033	0	0	0.0418049	0.0281466	0	0.129539	0	0
399	SPAL_0000348875	0	0.0556106	0	0	0	0.0278151	0	0.0512388	0	0
400	SPAL_0000348900	0	0	0	0	0	0	0	0.0780489	0	0
401	SPAL_0000349000	0.0969315	0	0.0398493	0.0266057	0.033571	0	0	0	0.0408622	0.066613
402	SPAL_0000349100	0	0.0314424	0	0	0	0	0.0553165	0	0	0
403	SPAL_0000349250	0	0	0	0	0	0	0	0	0	0
404	SPAL_0000349400	0	0.0277622	0	0.0265665	0	0.0277553	0	0	0.0826725	0
405	SPAL_0000350325	0.0489811	0	0	0.165418	0	0.0841943	0.19384	0.101165	0.122651	0
406	SPAL_0000351025	0	0.0276301	0	0	0	0.0273142	0.0647882	0	0	0.0663651
407	SPAL_0000351300	0	0.0537244	0	0	0	0	0	0	0.0408712	0
408	SPAL_0000351400	0	0.037425	0	0	0	0	0	0.0257587	0	0.0664776
409	SPAL_0000351500	0	0	0	0.0271024	0	0	0	0.0988147	0.0410107	0
410	SPAL_0000351700	0	0	0	0	0	0	0	0.0260164	0	0
411	SPAL_0000351800	0	0	0	0	0	0	0	0.0520327	0	0
412	SPAL_0000351900	0	0	0	0	0	0	0	0.078049	0	0
413	SPAL_0000352000	0	0.0268614	0.0790552	0.108557	0.135312	0.0283454	0	0.0260056	0.0409142	0
414	SPAL_0000354600	0	0	0	0.0266364	0.0675407	0	0.263938	0.23098	0.0413987	0
415	SPAL_0000354700	0.000130372	0.167857	0.183191	0.063674	0.0400431	0.00592799	0.146171	0.200284	0.0997963	0
416	SPAL_0000354900	0	0.0404225	0	0	0.0167512	0	0.0324289	0	0	0
417	SPAL_0000355000	0.0963997	0	0.198527	0.0809069	0	0.0281879	0	0	0.0409516	0
418	SPAL_0000355100	0	0.161288	0	0.0271306	0.0676705	0	0	0.0520086	0	0
419	SPAL_0000357333	0.0490308	0.164114	0.0805413	0.0264125	0	0.0276	0.130675	0.10185	0.0410157	0
420	SPAL_0000357366	0.183608	0.197804	0.0782041	0.109964	0	0.0280767	0	0	0	0
421	SPAL_0000360500	0	0.108543	0	0	0	0	0	0.0772091	0	0
422	SPAL_0000361600	0	0.0646127	0	0.0230193	0.00698553	0	0	0	0	0
423	SPAL_0000361700	0	0.0811434	0.119794	0.0535241	0.067421	0.139985	0	0	0.123007	0.0667586
424	SPAL_0000363200	0	0.0565936	0.078929	0.0800866	0	0	0	0	0.0395354	0
425	SPAL_0000363500	0.0451618	0.0284769	0	0	0	0	0	0	0	0
426	SPAL_0000363700	0	0	0.0800053	0	0	0	0	0.0256848	0	0
427	SPAL_0000364300	0	0	0	0	0	0	0	0	0	0
428	SPAL_0000364600	0	0.0536864	0	0	0	0	0	0	0	0
429	SPAL_0000364700	0	0.030488	0	0.0270841	0.0338445	0.0316134	0	0.103945	0.245943	0
430	SPAL_0000364800	0	0	0	0	0	0	0	0	0	0
431	SPAL_0000364900	0	0	0	0	0	0	0	0	0	0
432	SPAL_0000365300	0	0.135005	0	0.0270385	0.0338532	0.0282599	0	0.0259682	0.0820896	0
433	SPAL_0000365400	0	0.0269679	0	0.0270313	0	0	0	0.0259549	0.0410033	0
434	SPAL_0000365700	0	0	0	0	0	0	0.021604	0	0.0923312	0
435	SPAL_0000365900	0	0.0280466	0	0.0265712	0.0165533	0	0	0	0.0409111	0
436	SPAL_0000366100	0	0.0270446	0.0399072	0	0.066749	0	0	0	0.122171	0
437	SPAL_0000366300	0.144347	0.0269095	0.0396452	0	0.0675278	0.08461	0	0.0259094	0.122759	0
438	SPAL_0000369000	0	0	0	0	0	0	0	0	0	0
439	SPAL_0000369500	0	0	0	0	0	0	0	0	0	0
440	SPAL_0000369600	0	0	0.0394917	0	0	0	0	0	0	0
441	SPAL_0000371100	0.0485555	0.460144	0.0398989	0.0785757	0	0	0.0647458	0	0	0
442	SPAL_0000371200	0	0	0	0	0.0126513	0.0166331	0	0.0134233	0	0
443	SPAL_0000371275	0.0487668	0.135972	0	0	0.0333914	0	0.45527	0.228384	0.0408325	0
444	SPAL_0000371300	0.0564257	3.93499e-09	0	0.0321671	0	0	0.253428	0	0	0.149907
445	SPAL_0000371525	0.048746	0.0273738	0.0401388	0	0.0331113	0	0.0648532	0.206669	0.0407169	0
446	SPAL_0000371800	0	0	0	0	0.0338077	0.0281198	0.0651453	0.129389	0.0410827	0
447	SPAL_0000371900	0	0.0272806	0	0	0.101152	0.0556257	0.0654982	0.0513152	0.0411199	0
448	SPAL_0000373600	0	0.19164	0.0791272	0.0812838	0.0676196	0.056607	0	0	0.12275	0.132359
449	SPAL_0000373700	0.0480363	0.0287258	0	0	0	0	0.0968293	0.129326	0	0
450	SPAL_0000380300	0	0.0539626	0.0398435	0	0.033592	0	0.259749	0.231058	0.0817496	0
451	SPAL_0000384800	0	0	0	0	0	0	0	0.0295254	0.122952	0
452	SPAL_0000386800	0	0.0134216	0	0	0	0	0	0	0	0
453	SPAL_0000387750	0	0.254779	0	0.0298019	0.149611	0.0913237	0	0.0255533	0.165438	0.0674864
454	SPAL_0000390175	0.14616	0.0542216	0.0769759	0.132501	0	0.0551473	0.0650144	0	0	0.467187
455	SPAL_0000391400	0	0.0269573	0.0796405	0	0	0	0.194542	0.305597	0.162937	0.0665567
456	SPAL_0000391475	0	0.0539722	0	0	0	0.0564439	0	0.0259373	0.164056	0
457	SPAL_0000391500	0	0	0.0395918	0	0.0674215	0	0.0646093	0	0.0408591	0
458	SPAL_0000391600	0	0	0	0	0	0	0	0	0	0
459	SPAL_0000391700	0	0	0	0	0	0	0	0	0	0
460	SPAL_0000391800	0	0.0249615	0.0394286	1.73181e-08	0	0.0573587	0	0	0	0
461	SPAL_0000391900	0	0	0	0	0	0	0	0	0	0
462	SPAL_0000392100	0.0480301	0	0	0	0.0337417	0	0	0	0.220678	0
463	SPAL_0000392600	0	0.0301562	0	0	0	0	0.0965879	0.0536455	0	0
464	SPAL_0000392700	0	0.028522	0	0.038234	0	0	0	0.0120994	0	0
465	SPAL_0000393400	0.144937	0.0808837	0.039772	0.0268319	0.0336998	0.0561128	0	0	0	0.199511
466	SPAL_0000393500	0	0.0268432	0	0	0	0	0	0	0	0
467	SPAL_0000394000	0	0.0271554	0.0390387	0	0	0	0	0	0	0
468	SPAL_0000394050	0	0.275155	0	0.0795046	0.0336378	0	0.0656295	0.12772	0.0411779	0
469	SPAL_0000397500	0	0	0	0	0	0	0	0	0	0
470	SPAL_0000397600	0	0.027501	0.28311	0.13251	0.0672833	0.138454	0	0	0.164725	0
471	SPAL_0000397700	0	0.136393	0.0402344	0.0528756	0.0335784	0	0	0	0	0
472	SPAL_0000397800	0	0	0	0.0268373	0.0339055	0	0	0	0.0413021	0
473	SPAL_0000398400	0	0	0	0	0	0	0	0	0	0
474	SPAL_0000398700	0	0.136248	0.120687	0.0265626	0.26943	0.291559	0.0654235	0	0	0
475	SPAL_0000398800	0	0	0	0	0	0	0	0	0	0
476	SPAL_0000399300	0	0.0630547	0	0	0.0537521	0.0280853	0	0.0373975	0.0668387	0
477	SPAL_0000399433	0.0962334	0.0269145	0	0.0540158	0.0337797	0.0282233	0.129412	0.025925	0.0409323	0.265261
478	SPAL_0000401800	0	0.0268036	0.0395283	0	0	0	0	0	0	0.0661013
479	SPAL_0000406750	0	0.0567414	0	0	0	0	0	0.0498738	0	0.0652625
480	SPAL_0000407500	0	0	0.122205	0.0267376	0	0.0279401	0	0	0	0
481	SPAL_0000407516	0	0	0.12186	0.0833649	0	0	0	0.0501799	0.0405931	0.0656347
482	SPAL_0000407532	0	0	0	0.0266626	0.0338142	0	0.0657226	0	0	0
483	SPAL_0000407700	0	0	0	0	0	0	0	0	0	0
484	SPAL_0000407800	0	0.0438317	0.197872	0	0	0	0	0.1169	0	0
485	SPAL_0000407900	0.242654	0.0279967	0.0801211	0.104358	0	0	0	0	0.0405249	0.165522
486	SPAL_0000408000	0.0966273	0	0	0	0	0	0	0.282048	0	0.0664306
487	SPAL_0000408100	0	0.0464126	0	0	0	0	0	0.0201321	0	0
488	SPAL_0000408200	0	0.0425153	0	0	0	0	0	0	0	0
489	SPAL_0000408300	0	0.0268432	0	0	0	0	0	0	0	0
490	SPAL_0000408400	0	0.027051	0	0.053905	0	0	0	0	0	0
491	SPAL_0000408500	0	0.0269152	0.118973	0.026975	0	0	0	0	0	0
492	SPAL_0000408600	0	0	0	0	0	0.0283123	0	0.0264537	0	0
493	SPAL_0000408700	0	0.186333	0	0.022258	0	0	0	0	0	0
494	SPAL_0000408800	0	0.0417842	0.0617213	0.0421998	0.210956	0.132441	0	0.0811202	0	0
495	SPAL_0000408900	0	0.0807467	0.0793199	0	0	0.0281851	0	0.0776907	0	0.0663316
496	SPAL_0000409200	0	0	0	0.0271609	0	0	0	0	0	0
497	SPAL_0000409300	0.0486713	0	0.0799723	0	0.0672011	0.0556225	0	0.0256419	0.368419	0.133679
498	SPAL_0000409400	0.0958262	0.0534853	0	0	0	0	0	0	0	0
499	SPAL_0000409600	0.0739637	0.0548697	0	0.128783	0.0320896	0.0276241	0.0122672	0.211781	0.198932	0.104514
500	SPAL_0000409700	0.0480353	0.215049	0	0	0.0675292	0.141149	0.0646153	0	0.204481	0
501	SPAL_0000409800	0	0	0	0	0.0339096	0.0279998	0	0	0.041337	0
502	SPAL_0000409900	0	0.243544	0.0399258	0.107625	0.135239	0.0562739	0	0.0517754	0.328564	0
503	SPAL_0000410000	0	0	0	0	0	0.0283646	0	0	0	0
504	SPAL_0000410600	0	0.081265	0	0	0.0333708	0	0	0	0.0407467	0.0666221
505	SPAL_0000412800	0	0	0	0	0	0	0.0631142	0.0265819	0	0
506	SPAL_0000412900	0	0	0	0	0	0	0	0	0	0
507	SPAL_0000413000	0	0	0.0398207	0	0.0335509	0	0	0	0	0
508	SPAL_0000413400	0.0482403	0.0539053	0.0397307	0.0269369	0.033759	0.0281578	0.0648208	0.155302	0	0
509	SPAL_0000413500	0	0.0809401	0	0	0.0335939	0	0.0649347	0.0256759	0	0.199817
510	SPAL_0000413600	0	0.0813789	0	0	0.0337605	0	0	0.051597	0	0
511	SPAL_0000413700	0	0	0	0.0539758	0	0	0.13015	0.233498	0	0
512	SPAL_0000415200	0	0.0269794	0.0397691	0.0269688	0.0337959	0.112763	0.194652	0.129565	0	0
513	SPAL_0000415700	0	0	0	0.0259317	0.0796799	0.027039	0	0.0248828	0.0402197	0
514	SPAL_0000416975	0	0.188708	0	0.132752	0.0260091	0.0475028	0.218152	0.0271812	0.109935	0
515	SPAL_0000417100	0	0.0340178	0.0395766	0	0.0675399	0	0.085939	0.0328331	0.566084	0
516	SPAL_0000417233	0	0	0	0	0	0	0	0	0.22495	0
517	SPAL_0000417266	0	0	0	0	0	0	0	0	0.22495	0
518	SPAL_0000417300	0	0.0268432	0	0	0	0	0	0	0	0
519	SPAL_0000417400	0.0480475	0	0.0396038	0.0541084	0	0	0	0.0778593	0	0
520	SPAL_0000417500	0	0	0	0	0	0	0	0	0.0565129	0
521	SPAL_0000417700	0	0.0268631	0	0	0	0	0	0	0.0407259	0.0724766
522	SPAL_0000418100	0	0	0.0831936	0	0.028954	0	0	0.0201835	0	0.0853423
523	SPAL_0000418200	0	0	0	0	0	0	0	0	0	0.0660651
524	SPAL_0000418300	0	0.0269806	0	0	0	0	0	0.0411846	0.0436308	0
525	SPAL_0000418400	0	0	0	0	0	0	0	0	0	0
526	SPAL_0000424700	0	0	0	0	0	0	0	0	0	0
527	SPAL_0000425100	0	0	0	0	0	0	0	0	0	0
528	SPAL_0000425200	0	0	0	0	0.0338578	0	0	0.0259952	0	0
529	SPAL_0000426000	0.228586	0.0269311	0.158891	0.0268216	0	0	0.102307	0.0865416	0.0902654	0
530	SPAL_0000426100	0.0731173	0.0408356	0	0	0.0166308	0	0.318078	0.145233	0	0.196308
531	SPAL_0000426200	0	0	0	0	0	0.0283069	0	0.0521388	0	0
532	SPAL_0000426400	0.0845186	0.0997503	0	0.0115396	0.209948	0	0	0	0	0
533	SPAL_0000426700	0	0.0269204	0	0	0	0	0.194248	0.0258341	0	0
534	SPAL_0000426800	0	0.123622	0.0396639	0.0270305	0.144695	0.0708368	0.0647322	0.156405	0.0543315	0
535	SPAL_0000426900	0.0480388	0.0806566	0	0.0270307	0.0337756	0	0.0646236	0.0518681	0	0.132453
536	SPAL_0000427000	0	0.0998179	0	0.0440429	0	0.0281841	0	0	0.0547332	0.133009
537	SPAL_0000427100	0	0.0690014	0	0.258557	0.0260648	0.00415539	0	0.0122523	0.0540191	0.0407797
538	SPAL_0000427400	0	0	0	0	0	0	0	7.55038e-05	0.0411217	0
539	SPAL_0000427500	0.0486683	0.123134	0.0400016	0.0266407	0.0672865	0	0	0.287132	0	0
540	SPAL_0000429850	0	0	0	0	0	0	0	0	0	0
541	SPAL_0000430900	0	0	0	0	0	0	0	0	0.0817997	0
542	SPAL_0000431000	0	0	0	0	0	0	0	0	0	0.000646141
543	SPAL_0000435500	0	0.0268433	0	0	0	0	0	0	0	0
544	SPAL_0000435700	0.192656	0.0269332	0	0.0269989	0	0.0282161	0.0647577	0.0259232	0.122854	0
545	SPAL_0000435900	0	0.0806497	0	0	0.0337577	0	0.129248	0.372054	0.195285	0.0662288
546	SPAL_0000436000	0	0	0	0	0.0675342	0.0335655	0.0650177	0	0.0410188	0
547	SPAL_0000436200	0	0.0269162	0	0	0	0	0	0.0259458	0	0
548	SPAL_0000436300	0	0	0	0	0	0	0	0	0	0
549	SPAL_0000436400	0	0.0540562	0	0	0.0674958	0	0	0.0516646	0.123029	0
550	SPAL_0000436500	0	0	0	0	0	0	0	0	0	0
551	SPAL_0000437100	0.0483174	0	0.0397888	0.350231	0.0337831	0.0844939	0	0	0	0
552	SPAL_0000437200	0	0	0	0	0	0	0	0	0	0
553	SPAL_0000437300	0	0.108436	0	0	0.068308	0.085244	0	0.0266973	0	0
554	SPAL_0000438150	0	0.0570967	0	0	0	0	0.508827	0.322694	0	0
555	SPAL_0000438900	0	0.0272559	0	0.0263997	0	0	0	0	0	0.0669528
556	SPAL_0000439200	0	0	0	0	0	0	0	0	0.0204258	0.092997
557	SPAL_0000439500	0	0.107483	0.0791713	0	0	0	0.0646023	0.025879	0	0
558	SPAL_0000439600	0	0	0	0	0.0338299	0	0	0	0	0
559	SPAL_0000439700	0	0	0	0	0	0	0	0	0	0
560	SPAL_0000440100	0	0	0	0	0	0.0278362	0.0658742	0.153476	0.0830047	0
561	SPAL_0000440400	0	0.0826794	0	0.0265942	0	0	0	0.0256335	0.413047	0
562	SPAL_0000445600	0	0.0553612	0	0.0267728	0.0339886	0.0559698	0	0.206639	0	0
563	SPAL_0000445700	0	0.253192	0	0.133553	0.100898	0.0278118	0	0.136457	0.0829152	0
564	SPAL_0000445800	0	0.0538331	0.198321	0.0539158	0	0	0	0	0.491012	0
565	SPAL_0000446000	0	0.0538143	0.0396332	0.0540413	0	0.0282349	0.258732	0	0.409279	0
566	SPAL_0000446100	0	0.118769	0.0793598	0.0660011	0	0.0281908	0.0757129	0.0811346	0.0496504	0.0663645
567	SPAL_0000446200	0	0	0	0.0271395	0	0.0283868	0	0	0	0
568	SPAL_0000446700	0.0974303	0	0	0	0	0	0	0.0521127	0	0
569	SPAL_0000446800	0	0	0	0	0	0	0	0	0	0
570	SPAL_0000446900	0	0.0653014	0	0	0	0	0	0.0620032	0	0
571	SPAL_0000446975	0	0	0	0	0	0	0	0	0	0
572	SPAL_0000447000	0	0	0	0	0	0	0	0	0	0
573	SPAL_0000447100	0	0.0269008	0	0	0.0337577	0	0	0	0	0
574	SPAL_0000447200	0	0	0	0	0	0	0	0	0	0
575	SPAL_0000447300	0	0	0	0	0	0	0	0	0	0
576	SPAL_0000447400	0	0.0128666	0	0	0	0	0	0	0	0
577	SPAL_0000447700	0	0.0538149	0.0469232	0.0592655	0.0338141	0	0	0.129987	0	0
578	SPAL_0000447750	0	0.0539085	0.159042	0	0.0336942	0.0280541	0.194522	0.0774191	0.040918	0.0664849
579	SPAL_0000448000	0	0.0542174	0.039855	0	0.033121	0	0.0646299	0	0	0
580	SPAL_0000448100	0.0487094	0.0856287	0.0403466	0.0809123	0.0326739	0	0.128333	0.174967	0.0404788	0
581	SPAL_0000448200	0	0.027055	0.0799128	0	0.0336652	0.0558413	0	0.257219	0.204871	0.0667901
582	SPAL_0000448300	0.0961883	0.0807145	0.158529	0.0540176	0.0337743	0	0	0.0259233	0.0409212	0
583	SPAL_0000448400	0	0.0806207	0.197947	0	0	0	0	0.103535	0.0817386	0.132431
584	SPAL_0000448500	0.0484453	0.0539768	0	0	0.0336365	0	0	0.0257216	0	0
585	SPAL_0000448600	0	0.0550127	0.0404521	0.0265072	0.0672963	0	0	0.0510967	0	0
586	SPAL_0000448700	0	0	0	0	0.0339786	0	0	0.0259026	0	0
587	SPAL_0000448800	0	0.0272956	0	0.0267121	0	0	0	0	0	0
588	SPAL_0000448900	0.0486387	0.216285	0.0798455	0	0.0668743	0	0	0.0509079	0	0
589	SPAL_0000448925	0	0.053573	0.0395753	0	0	0	0	0	0	0
590	SPAL_0000449500	0	0	0.0812183	0.215138	0.0339175	0.111789	0	0	0.209135	0
591	SPAL_0000449700	0	0	0	0	0.0865656	0	0	0	0.0703178	0.0421703
592	SPAL_0000449800	0	0	0	0	0	0	0	0	0	0
593	SPAL_0000449900	0	0	0.0404536	0	0	0	0	0	0.039932	0
594	SPAL_0000450450	0.144621	0.0269192	0	0	0.0673746	0.0561524	0	0	0	0.0663826
595	SPAL_0000450500	0	0.0268433	0	0	0	0	0	0	0	0
596	SPAL_0000450800	0	0	0	0.0271217	0	0	0	0.0260538	0	0
597	SPAL_0000451075	0	0	0.0802865	0.0267214	0	0	0	0	0	0
598	SPAL_0000451100	0	0	0	0	0.0675894	0	0.0769009	0.051894	0.0818635	0
599	SPAL_0000451200	0	0	0	0	0	0	0.0644803	0	0	0
600	SPAL_0000453800	0.0487334	0	0	0	0.0331456	0	0	0	0.0407238	0.0665415
601	SPAL_0000453900	0	0.107622	0.0396397	0.0269813	0.0337576	0	0.0646887	0.284942	0.0818256	0.0662991
602	SPAL_0000454000	0	0.0537754	0	0	0	0	0.258548	0.207296	0.0408975	0
603	SPAL_0000454100	0	0	0.0398568	0.0266798	0	0	0	0	0.0409072	0.0666343
604	SPAL_0000454400	0	0.107165	0	0	0	0	0	0	0	0
605	SPAL_0000454500	0	0	0.0394914	0	0	0	0	0	0	0
606	SPAL_0000454800	0	0.0281858	0	0	0.0331957	0	0.0650847	0.238286	0	0.13344
607	SPAL_0000455900	0	0.0537305	0.0791562	0	0	0	0.193769	0.0517435	0.0408547	0.0661966
608	SPAL_0000456400	0	0	0	0	0	0	0	0	0	0
609	SPAL_0000456500	0	0	0	0	0	0.0277124	0	0.0798943	0	0
610	SPAL_0000457300	0	0.107677	0.0396662	0.0269687	0	0	0.0647285	0.210901	0.0818492	0
611	SPAL_0000457500	0	0.0270413	0.119661	0.0269242	0	0.0281519	0	0.0258951	0.0821054	0
612	SPAL_0000457600	0.0479685	0.214649	0.0395264	0	0	0	0	0	0.122414	0
613	SPAL_0000457700	0	0.283789	0.0395949	0	0	0	0.0789656	0.0965424	0.040846	0.066222
614	SPAL_0000457800	0	0.0268885	0.0395933	0	0.0337934	0.0282675	0.0646257	0.051906	0.0409181	0
615	SPAL_0000458500	0	0	0	0	0	0	0	0	0	0
616	SPAL_0000458600	0	0.054134	0	0	0	0	0	0.0258016	0	0
617	SPAL_0000459000	0.0242299	0	0.0198924	0	0.0165466	0	0	0	0	0.0331208
618	SPAL_0000459100	0.240762	0.0538249	0.158656	0.0807837	0	0.0562919	0.0647185	0	0.0818051	0
619	SPAL_0000459200	0.239899	0.0537452	0.0395583	0.30748	0	0.0282983	0.0645751	0.0779183	0.0818211	0
620	SPAL_0000459300	0	0.053732	0.118636	0.0812921	0	0	0	0	0.163622	0
621	SPAL_0000459400	0	0	0.0394998	0	0	0	0.064465	0	0	0.0660667
622	SPAL_0000459500	0	0	0.0800398	0.0794492	0	0	0	0	0	0.0668711
623	SPAL_0000467700	0	0.084241	0	0.159619	0	0	0	0.101247	0.0410551	0
624	SPAL_0000477200	0	0.134949	0.0398388	0.0802688	0	0	0	0	0.122807	0
625	SPAL_0000481100	0	0.163971	0	0	0.135548	0.056026	0	0.516678	0	0
626	SPAL_0000481400	0.0966109	0.0673998	0.0209782	0.0524853	0	0.018306	0.120035	0.0299099	0.144016	0.256679
627	SPAL_0000481700	0	0.134207	0.0395338	0	0	0	0.193568	0	0.0939484	0
628	SPAL_0000483650	0	0.110328	0.162203	0.159265	0	0.0554932	0	0.204711	0.123784	0
629	SPAL_0000483700	0	0.0820402	0.0402014	0.0790169	0	0.027527	0.0652269	0	0.0409253	0.0669405
630	SPAL_0000483750	0	0	0.081775	0.0555205	0.0328713	0	0	0.0504853	0.0819159	0.066196
631	SPAL_0000483850	0.0950513	0.0572309	0.119189	0.271796	0	0.137683	0	0	0	0.127989
632	SPAL_0000487750	0	0	0	0	0	0	0	0	0.0817998	0
633	SPAL_0000488650	0	0	0	0	0	0	0	0	0	0
634	SPAL_0000493200	0.047994	0.0537569	0.0395687	0.0014365	0.0433403	0.0565946	0.064591	0.13389	0	0
635	SPAL_0000493300	0	0.0825664	0.0786033	0.45074	0	0.112354	0	0	0.155324	0
636	SPAL_0000493700	0	0	0	0	0	0	0.0644802	0	0	0
637	SPAL_0000493900	0	0.136561	0.321608	0.0527109	0	0.110166	0.0652122	0	0.122802	0.0669458
638	SPAL_0000494000	0.0972125	0.0270203	0	0.0528854	0	0	0.0649769	0	0.040806	0
639	SPAL_0000494025	0	0.0821925	0.120652	0.0262849	0.0332824	0	0	0	0.0408919	0.0668161
640	SPAL_0000494100	0	0.0282704	0.0520926	0.0808684	0.0337938	0	0	0.138856	0.0554647	0
641	SPAL_0000495800	0	0	0	0	0	0	0	0	0	0
642	SPAL_0000500000	0	0.0805295	0	0	0	0	0	0	0	0
643	SPAL_0000500300	0	0	0	0	0	0.0282242	0.085634	0	0	0
644	SPAL_0000500400	0	0	0.0496725	0.0720753	0	0	0.0326852	0.0272932	0	0.0671084
645	SPAL_0000500500	0	0.0812816	0	0	0	0	0	0.025776	0	0
646	SPAL_0000500600	0	0.0539493	0	0	0	0	0	0.0517793	0	0
647	SPAL_0000500700	0	0.0804697	0	0	0	0	0	0	0	0.132228
648	SPAL_0000501100	0	5.1506e-09	0	0.00446084	0	0	0	0	0	0
649	SPAL_0000501200	0	0	0	0	0.0274278	0	0	0.0259422	0	0
650	SPAL_0000501300	0.048165	0.035864	0	0.0268384	0	0	0	0	0	0.265305
651	SPAL_0000504900	0.0976585	0.0849826	0.0807129	0.0267441	0	0.0274858	0.0644632	0.0250925	0.0406567	0.197599
652	SPAL_0000505000	0	0.0809659	0	0.0807552	0	0	0.129835	0.0258784	0.0409885	0
653	SPAL_0000506100	0	0	0	0	0	0	0	0	0	0
654	SPAL_0000506675	0	0.0551553	0.0399795	0.0261244	0	0	0	0	0	0
655	SPAL_0000507500	0.0480412	0.215255	0.0395791	0	0	0	0	0.0258433	0.122508	0.0661961
656	SPAL_0000508800	0	0.0538553	0.119047	0	0.101278	0.0281801	0	0.129477	0.491187	0.0663677
657	SPAL_0000509333	0.0470788	0.145607	0.0806126	0.14257	0.0633752	0.0582732	0	0.166894	0	0
658	SPAL_0000509366	0.0487857	0.0566047	0.0806409	0.187042	0.0656164	0.0549226	0	0	0.121862	0.197422
659	SPAL_0000509450	0	0	0.0419152	0	0	0	0.0626169	0.0749163	0.0413926	0
660	SPAL_0000511700	0	0	0.0405622	0.132722	0.0672938	0	0.328795	0.153389	0	0
661	SPAL_0000512200	0	0.179048	0	0	0	0.028199	0	0.0518744	0	0
662	SPAL_0000512225	0	0.0275999	0	0	0.0333248	0	0.130682	0.202859	0	0
663	SPAL_0000512300	0	0.0806828	0.0454494	0.0270564	0.0460877	0	0.0646409	0.0519092	0	0
664	SPAL_0000512400	0	0.0538629	0.0397309	0	0	0	0	0	0.571117	0
665	SPAL_0000512500	0	0	0	0	0	0	0.0844989	0.138776	0.0991259	0
666	SPAL_0000512600	0	0.0269198	0	0	0	0	0	0.0259198	0.0409355	0
667	SPAL_0000512700	0	0.108004	0.0398281	0.0268824	0	0	0	0.0258553	0.0409911	0
668	SPAL_0000512800	0	0.134543	0.0396701	0.0268747	0	0	0	0	0.0408785	0.0663437
669	SPAL_0000513000	0	0.0624559	0	0	0.0337967	0.0281997	0.12972	0.0715029	0	0
670	SPAL_0000513100	0	0	0	0	0	0	0	0	0	0
671	SPAL_0000513200	0	0.0204008	0	0	0	0.0282893	0	0.0264804	0	0
672	SPAL_0000513300	0	0	0	0.0539711	0.0338987	0	0	0.0519199	0.0411719	0
673	SPAL_0000513400	0	0	0	0	0	0	0.129279	0.184569	0	0
674	SPAL_0000513900	0.0489491	0.0558206	0	0.0528841	0	0	0	0.301901	0	0
675	SPAL_0000514000	0	0	0.0624977	0	0	0	0.0644008	0	0	0
676	SPAL_0000514200	0	0	0	0	0	0	0	0	0.396902	0
677	SPAL_0000514600	0.0485298	0.0280914	0	0	0	0	0.513238	0.124634	0.0404888	0
678	SPAL_0000515100	0	0	0	0	0	0	0	0	0.047557	0
679	SPAL_0000515400	0	0	0	0	0	0	0.117017	0	0	0
680	SPAL_0000515500	0	0	0	0	0	0	0	0.114451	0	0
681	SPAL_0000515600	0	0.11341	0	0	0.227252	0.0420829	0	0.0324881	0.0686632	0
682	SPAL_0000515700	0	0	0	0	0	0	0	0	0	0
683	SPAL_0000515800	0	0.108555	0.0400751	0.105911	0	0	0	0	0	0
684	SPAL_0000516300	0	0.000663049	0	0.027019	0	3.8403e-05	0	0.0258117	0	0
685	SPAL_0000516500	0	0	0	0	0	0	0	0.0260164	0	0
686	SPAL_0000516900	0	0	0	0	0	0	0	0	0	0
687	SPAL_0000517000	0.130333	0.0537805	0	0	0.10102	0	0.0918869	0.0509308	0.0732253	0.154062
688	SPAL_0000517100	0	0	0	0	0	0	0	0.0255895	0	0.134341
689	SPAL_0000517300	0	0.0564753	0	0	0	0	0	0.0249974	0.121472	0
690	SPAL_0000517500	0	0.0282824	0	0	0.0337302	0	0	0	0	0
691	SPAL_0000517600	0	0.107837	0	0	0	0.0282426	0	0	0	0
692	SPAL_0000517700	0	0	0	0	0	0	0	0	0	0
693	SPAL_0000517800	0	0.0816079	0	0	0	0	0	0	0	0
694	SPAL_0000517900	0	0.0544643	0	0.0268415	0	0	0	0	0	0
695	SPAL_0000522200	0	0	0	0.031782	0	0	0.0298743	0.0394502	0	3.05394e-09
696	SPAL_0000523800	0	0	0	0	0	0	0	0	0	0
697	SPAL_0000523900	0	0	0.0409259	0.0533013	0	0	0	0.153555	0	0
698	SPAL_0000524200	0	0.108065	0.0797544	0	0.0336955	0.028005	0.0650089	0.0515574	0.0819446	0
699	SPAL_0000524300	0	0.0268968	0	0.0270825	0	0	0	0	0.0818737	0
700	SPAL_0000524400	0	0	0	0.0542937	0.0676941	0	0	0.0260165	0	0
701	SPAL_0000524475	0	0.0536867	0	0	0	0	0	0	0	0
702	SPAL_0000524500	0	0	0	0	0	0	0	0.0780486	0	0
703	SPAL_0000525100	0	0.0276911	0	0	0	0	0.194579	0.100639	0.0407749	0
704	SPAL_0000525300	0	0.270451	0.0798398	0.107228	0	0	0	0.0516205	0.041018	0
705	SPAL_0000525700	0	0	0	0	0	0	0	0.0301378	0	0
706	SPAL_0000526000	0	8.31951e-10	0	0	0	0	0	0.335847	0	0
707	SPAL_0000526025	0	0.0819971	0	0.0798613	0.0337559	0	0.0656039	0.15412	0	0
708	SPAL_0000526100	0	0	0	0	0.0285612	0	0.0650568	0	0	0
709	SPAL_0000526500	0	0.0809597	0.0797076	0	0.0671678	0	0.0649549	0.0513242	0.204364	0
710	SPAL_0000526550	0	0.0273032	0	0.026568	0	0	0	0	0.411131	0
711	SPAL_0000526800	0	0.107881	0.0397558	0.0808764	0.0337839	0.0563609	0	0.0518073	0.0819626	0.0664884
712	SPAL_0000528400	0	0.0805128	0.1185	0	0	0	0	0	0	0
713	SPAL_0000528600	0	0.107591	0.0396072	0.0541277	0	0	0	0.0778822	0.0818632	0
714	SPAL_0000531500	0.147248	0.0563204	0.121625	0.106642	0.0330066	0.0183573	0.0648802	0.0252286	0.0819071	0
715	SPAL_0000531600	0.144379	0	0.0396265	0	0.0336176	0	0	0	0.0408065	0
716	SPAL_0000531900	0	0.11192	0.162791	0.0796237	0.0667243	0.0276021	0.0654036	0.202989	0.0411241	0
717	SPAL_0000532100	0	0	0.0399036	0.0268516	0.0337626	0	0	0	0.0820544	0
718	SPAL_0000532500	0	0	0.0399054	0	0.0334798	0	0	0	0	0
719	SPAL_0000532800	0	0	0	0	0	0	0	0	0	0
720	SPAL_0000533100	0	0.0269319	0	0	0.43899	0.0845711	0.0647609	0.0259038	0	0.0663761
721	SPAL_0000533125	0	0.055458	0	0.0264286	0	0	0.196434	0.0761624	0.0410902	0
722	SPAL_0000533200	0	0	0	0.0803798	0	0	0.0654257	0.0258288	0.0411625	0
723	SPAL_0000534700	0.195186	0.0566672	0.120263	0.026305	0	0	0	0.0726955	0	0.0667571
724	SPAL_0000534900	0	0.157753	0	0	0	0.0283096	0.129164	0.0259819	0.0818374	0
725	SPAL_0000535000	0	0.216527	0	0.0271151	0	0	0	0.125283	0	0
726	SPAL_0000535100	0	0.0540043	0	0.0538599	0	0	0	0	0.0410084	0
727	SPAL_0000535200	0.194185	0.0270065	0	0.239165	0	0	0.0649977	0.0512519	0	0.133372
728	SPAL_0000535225	0	0	0.0400173	0.0265253	0	0	0.0651663	0	0	0
729	SPAL_0000536000	0	0.108415	0	0.0326448	0.0493707	0.0466756	0	0.0258972	0	0.0836807
730	SPAL_0000536500	0	0.0393842	0.0401233	0	0	0.0278472	0	0.0874138	0.0464338	0
731	SPAL_0000537000	0	0	0	0	0	0	0	0	0.1227	0
732	SPAL_0000537025	0	0	0	0	0	0	0	0	0	0
733	SPAL_0000537100	0	0.161553	0	0.0811006	0.0338027	0	0.258916	0.0518921	0.163816	0
734	SPAL_0000537200	0	0.0269304	0	0	0	0	0.129562	0.051624	0	0
735	SPAL_0000537300	0	0.0273352	0	0.0266879	0.0336956	0	0	0.0256235	0.082273	0.0701001
736	SPAL_0000537500	0.194253	0.0270298	0	0	0	0.0557342	0	0.23107	0	0.0667274
737	SPAL_0000539700	0	0	0	0	0.0338299	0	0	0	0	0
738	SPAL_0000539800	0.0490658	0.08549	0	0.0539099	0.0330053	0.0276552	0.259153	0.22704	0	0.0661924
739	SPAL_0000539825	0	0.0402648	0	0	0	0	0	0	0	0
740	SPAL_0000539900	0	0.108325	0	0	0.0338547	0.0281888	0	0.0777897	0	0
741	SPAL_0000540000	0	0	0	0.0515365	0.0222134	0	0.0577193	0.00750378	0.00443488	0.155212
742	SPAL_0000540200	0	0	0	0	0	0	0	0	0.0408998	0
743	SPAL_0000540300	0	0	0.0406136	0.0643861	0.0339774	0.0280215	0	0.0258531	0	0
744	SPAL_0000543800	0.0482055	0.107748	0.0794092	0.026935	0	0.05631	0.194341	0.129392	0.122802	0
745	SPAL_0000544000	0.0478668	0.0285272	0	0.0538848	0	0	0	0.0699038	0	0
746	SPAL_0000544500	0	0	0	0	0.033756	0	0	0	0.0409893	0
747	SPAL_0000545400	0	0	0	0	0	0	0	0	0	0
748	SPAL_0000545600	0	0.0820908	0	0.0536161	0	0	0	0.077579	0	0
749	SPAL_0000545900	0	0.027164	0	0	0	0	0	0	0.161672	0
750	SPAL_0000546000	0	0.0327337	0.0398567	0	0.134869	0.0335105	0.0649789	0.0934705	0	0
751	SPAL_0000546100	0.04807	0.123617	0	0.0269938	0.101268	0	0.129295	0	0.0511117	0
752	SPAL_0000546200	0	0	0	0.0271608	0	0	0	0	0	0
753	SPAL_0000546500	0.0554622	0	0.039564	0.0810353	0	0	0	0	0.0512044	0.271847
754	SPAL_0000546600	0.147789	0	0	0.0265233	0	0	0.130413	0.0506429	0	0.133683
755	SPAL_0000547500	0	0	0	0	0	0	0	0	0.122699	0
756	SPAL_0000547700	0	0.133829	0.0649247	0.0362691	0	0	0.0189298	0	0.0553449	0
757	SPAL_0000547800	0	0.0386813	0.0214792	0	0	0	0	0.47083	0.00380107	0.132801
758	SPAL_0000548000	0	0.0268432	0	0	0	0	0	0	0	0
759	SPAL_0000548300	0	0	0	0	0	0.0319299	0.118249	0.126441	0	0
760	SPAL_0000550400	0.0488512	0.108916	0.0401386	0	0.0334815	0.0275785	0.0651592	0.381708	0.0409155	0
761	SPAL_0000550500	0	0.16444	0.0399316	0	0.032777	0	0	0	0	0
762	SPAL_0000550525	0	0	0	0	0	0	0	0	0	0
763	SPAL_0000550700	0	0	0	0	0	0	0	0	0	0
764	SPAL_0000550800	0	0.0960052	0.0797777	0.0606799	0.0674889	0.0280648	0.0906434	0	0	0
765	SPAL_0000550900	0	0.0277518	0	0	0.0402909	0	0	0.030692	0.0569939	0
766	SPAL_0000558100	0	0	0.0789833	0	0	0	0	0	0	0
767	SPAL_0000558200	0	0	0.0404849	0.0527993	0	0	0	0	0.0410555	0
768	SPAL_0000558300	0	0	0.0400306	0	0.0674269	0	0	0.0257552	0	0
769	SPAL_0000558600	0.193763	0.0808142	0.0397657	0	0	0	0	0.0759777	0	0.132792
770	SPAL_0000560400	0.048755	0.108838	0	0	0	0	0	0.0252923	0.529978	0
771	SPAL_0000561050	0.0489523	0.0544471	0	0.080284	0.0338145	0.0280022	0	0.232324	0	0
772	SPAL_0000562000	0	0	0.0910165	0	0.438852	0.333377	0	0	0.0410015	0
773	SPAL_0000562200	0	0	0	0	0	0	0	0	0	0
774	SPAL_0000562300	0	0	0	0	0	0	0	0	0	0
775	SPAL_0000562400	0.0406452	0.316959	0.0397602	0	0.141822	0.0280245	0	0.0358566	0	0.132966
776	SPAL_0000562600	0	0.0273415	0.0400499	0	0.032989	0	0	0	0.0406143	0
777	SPAL_0000564675	0	0	0	0	0	0	0	0	0	0
778	SPAL_0000564725	0	0.0270415	0.0392024	0	0	0	0	0	0	0
779	SPAL_0000566100	0	0.245326	0.0467543	0.0813659	0.101491	0.0680075	0	0.248801	0	0
780	SPAL_0000566300	0.0966356	0.00383254	0	0.0299478	0	0.0276847	0	0.125051	0	0.0652568
781	SPAL_0000566600	0	0.0268432	0	0	0	0	0	0	0	0
782	SPAL_0000566700	0	0	0.110426	0	0	0	0	0	0	0
783	SPAL_0000567200	0.0484153	0	0	0	0.0342773	0	0.0649161	0.180005	0.0817919	0
784	SPAL_0000567400	0	0	0	0	0	0	0	0.0260163	0	0
785	SPAL_0000567500	0.0964984	0.0269335	0	0	0	0.0280564	0	0	0.163579	0
786	SPAL_0000575200	0	0.0537711	0	0	0.0337729	0	0	0	0.0409045	0
787	SPAL_0000575300	0	0	0	0	0.0338299	0	0	0	0	0
788	SPAL_0000575500	0	0	0	0	0	0	0	0	0	0
789	SPAL_0000575700	0	0	0	0	0.0338299	0	0	0	0	0
790	SPAL_0000575900	0.0961303	0.0806763	0	0.0270081	0.101297	0	0.0664167	0.486057	0.0409061	0.0662525
791	SPAL_0000576000	0	0	0	0	0	0	0.130773	0.394875	0.0409224	0
792	SPAL_0000576100	0	0.0268433	0	0	0	0	0	0	0	0
793	SPAL_0000576200	0	0.0268432	0	0	0	0	0	0	0	0
794	SPAL_0000576400	0	0.02792	0	0.0579292	0	0.0275736	0.0653959	0	0	0
795	SPAL_0000576800	0	0.0319534	0	0	0	0.0282829	0	0	0	0
796	SPAL_0000576900	0	0	0	0	0	0	0	0	0	0
797	SPAL_0000577000	0	0.0538758	0	0	0	0	0.0647984	0.154797	0.0408975	0
798	SPAL_0000577025	0.0981423	0	0	0	0	0	0.324539	0.277491	0.0408962	0
799	SPAL_0000577600	0	0.0381025	0	0	0	0	0	0	0	0
800	SPAL_0000577700	0	0.10755	0	0	0.0337838	0	0.129253	0.181597	0.122736	0
801	SPAL_0000577800	0	0	0	0	0	0	0	0	0	0
802	SPAL_0000578300	0.148582	0.11126	0	0	0.0345997	0	0	0	0	0
803	SPAL_0000578375	0	0.139732	0.119261	0	0.0322988	0	0	0	0	0
804	SPAL_0000578400	0	0.110064	0.080111	0	0.0657133	0	0	0	0.0810346	0
805	SPAL_0000578425	0.048742	0	0.0400265	0.159328	0	0.0277765	0	0	0	0.133801
806	SPAL_0000578600	0	0.0807631	0.0397357	0	0.100777	0	0.129555	0.105264	0	0.199303
807	SPAL_0000580800	0	0.0336255	0.188322	0	0.0675958	0	0	0.0591993	0.0476839	0
808	SPAL_0000581200	0	0	0	0.0268198	0	0	0	0	0	0.133814
809	SPAL_0000581600	0.0673179	0	0.0397647	0.0269669	0	0.0281888	0	0.0259109	0.245948	0
810	SPAL_0000581900	0	0.0273942	0	0.0266168	0	0	0	0	0	0
811	SPAL_0000582000	0	0.107634	0	0	0.0337621	0	0.194086	0.0518155	0.0818355	0
812	SPAL_0000582100	0	0.053802	0.0396497	0.0269068	0	0	0	0	0.0817638	0.0663117
813	SPAL_0000582700	0	0.026865	0	0	0	0	0	0	0.0408669	0
814	SPAL_0000582800	0	0.0806389	0	0	0.033784	0	0	0	0	0
815	SPAL_0000582900	0	0.0268628	0	0	0	0	0.0646182	0	0.0407828	0
816	SPAL_0000583000	0	0.123582	0.0398096	0.0808113	0.134338	0.25569	0	0.111127	0	0.0665753
817	SPAL_0000583100	0	0	0	0	0	0	0	0	0	0
818	SPAL_0000583300	0	0	0	0	0	0	0	0	0	0
819	SPAL_0000583400	0	0	0	0	0	0	0	0	0	0
820	SPAL_0000583500	0.0480872	0.0268974	0.118873	0.0269889	0.0337572	0	0.0646656	0.0518145	0.49087	0
821	SPAL_0000583800	0	0.0393995	0.0399598	0	0	0	0.0843721	0.109756	0	0
822	SPAL_0000587100	0	0	0	0	0	0	0	0.0260162	0	0
823	SPAL_0000587600	0	0	0	0.0811511	0.06769	0.0282692	0.079906	0.0578842	0.082039	0
824	SPAL_0000587700	0	0	0	0	0.0699916	0.0609287	0.0655656	0	0.0446388	0.24279
825	SPAL_0000588000	0	0	0	0	0	0	0.0322402	0	0	0
826	SPAL_0000588100	0	0.0269948	0	0	0	0.0281408	0	0.051757	0	0.199714
827	SPAL_0000588200	0	0	0	0	0	0	0	0.0260163	0	0
828	SPAL_0000588300	0	0	0	0	0	0	0	0	0	0
829	SPAL_0000588400	0	0	0	0	0	0	0	0	0	0
830	SPAL_0000588600	0	0	0	0.0269172	0.0341366	0	0	0	0	0
831	SPAL_0000588700	0	0	0.11173	0.0307609	0	0.0277045	0.297419	0	0.164765	0
832	SPAL_0000589400	0	0.215032	0.0791424	0.0270806	0.0676052	0	0	0.0519364	0.0409152	0.0661915
833	SPAL_0000589500	0	0.080801	0.079401	0.0269276	0	0	0	0	0	0
834	SPAL_0000589600	0.0483638	0.107877	0.0398017	0.0267682	0.0336662	0	0.0648901	0.0126903	0.0409146	0
835	SPAL_0000590250	0	0.08623	0.0402785	0.0813342	0	0.0551919	0	0.074784	0.0806814	0
836	SPAL_0000592975	0.0478773	0	0	0	0	0	0	0	0	0
837	SPAL_0000594433	0	0.0805296	0	0	0	0	0	0	0	0
838	SPAL_0000594466	0	0.0286056	0	0.0540128	0	0	0.0637311	0.0248724	0	0
839	SPAL_0000597600	0	0.10783	0	0	0	0	0.129723	0.65202	0	0
840	SPAL_0000600400	0	0	0	0	0	0	0	0	0	0
841	SPAL_0000601600	0	0	0	0.224428	0	0	0	0	0	0
842	SPAL_0000601800	0	0.0274507	0.0343984	0	0	0	0.193564	0.00201837	0	0
843	SPAL_0000602000	0	0.0808439	0	0	0	0	0.25932	0.180431	0	0
844	SPAL_0000602200	0	0.0269274	0.0397354	0	0	0	0	0	0.162182	0
845	SPAL_0000602500	0	0.0268432	0	0	0	0	0	0	0	0
846	SPAL_0000602600	0.0856139	0.192274	0	0	0	0.0560038	0.100814	0	0.0408538	0
847	SPAL_0000602700	0	0	0	0	0.0676581	0	0	0.0412031	0.0553325	0
848	SPAL_0000602900	0	0	0	0	0	0	0.0657009	7.09685e-09	0	0
849	SPAL_0000603375	0	0	0	0	0	0	0	0	0	0
850	SPAL_0000603500	0	0.0269272	0	0	0	0	0.129539	0.0774585	0	0
851	SPAL_0000603900	0	0	0	0	0	0	0	0	0	0
852	SPAL_0000605100	0.0486824	0.378903	0	0	0.0335686	0.0277603	0.0651102	0.127993	0	0.0668181
853	SPAL_0000606900	0.193094	0.0269119	0.0397223	0	0.0335808	0	0	0.0256951	0.163285	0.0664116
854	SPAL_0000607600	0	0	0.0802148	0	0	0	0.0650841	0.0254019	0.572192	0
855	SPAL_0000609700	0	0	0	0.0271234	0	0	0	0.0260522	0	0
856	SPAL_0000610900	0	0	0	0	0	0	0	0.0520326	0	0
857	SPAL_0000611000	0	0	0	0	0	0	0	0.0345646	0.116397	0
858	SPAL_0000611200	0	0	0	0	0.0113074	0.00942911	0	0	0	0
859	SPAL_0000612200	0	0	0	0.108643	0	0	0	0	0	0
860	SPAL_0000612475	0	0.0958042	0	0	0.0380161	0	0	0	0	0
861	SPAL_0000612500	0	0.134181	0.0395018	0	0	0	0	0	0	0
862	SPAL_0000612600	0	0.1094	0	0.0800835	0.033834	0	0	0.0257569	0.0825161	0
863	SPAL_0000612700	0	0.054189	0	0.0538187	0	0	0	0	0	0
864	SPAL_0000612800	0	0.00743445	0	0.0268521	0	0	0	0	0	0
865	SPAL_0000612900	0	0	0	0	0	0	0.106398	0	0.0114119	0
866	SPAL_0000613200	0	0.0290503	0	0	0	0	0	0	0	0
867	SPAL_0000613400	0	0.0268165	0.0790621	0	0	0	0	0	0	0
868	SPAL_0000613500	0	0.0268562	0.0395619	0	0.0337094	0	0.12913	0	0	0
869	SPAL_0000613600	0	0	0	0	0	0	0.19344	0	0	0
870	SPAL_0000613700	0	0	0	0	0	0	0	0	0	0
871	SPAL_0000614000	0	0.313913	0.0741756	0	0	0.0563858	0	0.0963165	0	0
872	SPAL_0000615600	0.0481496	0.0268987	0.039654	0	0.033684	0	0	0.0888446	0	0
873	SPAL_0000616100	0	0.0262988	0	0	0	0	0	0	0.0408567	0
874	SPAL_0000616200	0	0.0806841	0	0	0	0	0.0646626	0.0258933	0	0
875	SPAL_0000616800	0.0485507	0.108094	0.119743	0.0266279	0.0336066	0	0.0650362	0.0770102	0.245488	0
876	SPAL_0000617300	0.0484596	0	0.0398718	0.0535568	0	0	0	0.0773451	0.122909	0
877	SPAL_0000617500	0.0485858	0.0270285	0.0399338	0.132978	0.0671725	0	0	0.256468	0.0409067	0.0667403
878	SPAL_0000617600	0	0.0397874	0	0	0	0.0100722	0.196025	0.0850163	0	0.200593
879	SPAL_0000617650	0	0.0543421	0	0	0	0.0278695	0.0653664	0.0256994	0.328601	0
880	SPAL_0000617700	0	0.0261795	0	0	0	0	0	0	0.0609769	0
881	SPAL_0000617800	0	0	0.0407128	0.0265605	0	0	0	0.0255494	0.250739	0
882	SPAL_0000617900	0	0.0538315	0.0793643	0	0	0	0	0.10332	0.0408873	0
883	SPAL_0000618100	0.0482894	0.0538995	0.23852	0.214625	0.0336901	0	0.0880188	0.154823	0.111267	0
884	SPAL_0000618600	0	0.107373	0	0	0	0	0	0	0	0
885	SPAL_0000618700	0	0.215677	0.0794836	0.0538819	0.135064	0.0844872	0.0648385	0.103553	0	0.0664644
886	SPAL_0000618900	0.0485862	0.108123	0.0798762	0.0266043	0.0671898	0	0.130112	0.410483	0.122739	0
887	SPAL_0000619000	0	0.0543206	0	0	0	0.0280579	0	0.0258421	0.0411426	0
888	SPAL_0000619100	0	0.0268432	0	0	0	0	0	0	0	0
889	SPAL_0000619300	0	0	0	0	0	0	0	0	0.408999	0
890	SPAL_0000619500	0	0.0271541	0	0.0267588	0.101311	0	0	0	0.534487	0
891	SPAL_0000619900	0	0	0	0	0	0	0	0	0	0
892	SPAL_0000621975	0.0479269	0.053631	0	0	0	0	0	0	0	0
893	SPAL_0000622000	0	0	0	0	0	0	0	0	0	0
894	SPAL_0000622150	0	0.0805296	0	0	0	0	0	0	0	0
895	SPAL_0000622200	0	0	0.0397485	0	0.0334235	0	0	0	0	0.0664382
896	SPAL_0000622300	0	0.0272506	0	0.026794	0	0.0280376	0.131164	0.180916	0	0
897	SPAL_0000622400	0	0.0273652	0	0	0	0	0	0.0254526	0.0410132	0
898	SPAL_0000622600	0	0.0549659	0	0.0268244	0.135994	0.0280633	0	0.0517644	0	0
899	SPAL_0000623600	0.0485583	0.0540634	0.0399226	0.0266467	0.100878	0.0557632	0	0	0.0409324	0.200191
900	SPAL_0000623900	0	0	0.020023	0	0.0167106	0	0	0	0.948209	0
901	SPAL_0000624000	0	0	0.020023	0	0.0167106	0	0	0	0.948209	0
902	SPAL_0000625800	0	0.125138	0	0	0	0	0	0	0.0407687	0
903	SPAL_0000626200	0	0.115362	0.131936	0	0.126926	0	0	0	0.0816955	0.331
904	SPAL_0000626300	0	0	0.0197459	0	0	0	0	0	0	0
905	SPAL_0000627100	0	0.0276394	0	0.0532917	0.0338239	0.0278391	0.26377	0.0770432	0	0
906	SPAL_0000627200	0	0.107485	0.0395635	0	0	0.0565332	0.0645794	0.0518983	0.0408978	0.0661779
907	SPAL_0000627300	0	0.0536863	0	0	0	0	0	0	0	0
908	SPAL_0000627400	0	0.0270779	0.23393	0	0.0214831	0.02805	0	0.0258226	0	0
909	SPAL_0000627500	0	0.0714609	0	0	0	0	0	0	0	0
910	SPAL_0000627600	0	0.0271166	0.0797666	0	0.0331973	0	0	0	0.203141	0.066443
911	SPAL_0000627700	0	0.110048	0.039751	0	0	0	0.063714	0	0.0401313	0
912	SPAL_0000627900	0	0	0.0400507	0.0267189	0.0674429	0	0.0652585	0.103031	0.0410544	0
913	SPAL_0000628000	0	0.34918	0.040079	0.0264987	0.167892	0	0.0652022	0.0255648	0	0.267834
914	SPAL_0000628200	0	0.0289879	0	0	0	0	0.00987206	0.0783902	0	0
915	SPAL_0000628300	0	0.0415285	0	0.0131692	0	0	0	0	0.0204525	0
916	SPAL_0000630400	0	0.51566	0	0	0.101449	0.168477	0	0.0258556	0.0411372	0
917	SPAL_0000633150	0	0	0.0414586	0.0300729	0	0.0309648	0.0515701	0	0	0
918	SPAL_0000635825	0	0.161766	0.119175	0.10809	0.135272	0.112965	0	0.103788	0.204961	0
919	SPAL_0000635850	0.14445	0.242288	0	0	0.067521	0.0281881	0	0.1036	0	0.199037
920	SPAL_0000638700	0	0	0	0	0	0	0	0	0.346782	0
921	SPAL_0000640850	0	0.0561267	0.0796181	0	0	0	0	0.0988174	0	0
922	SPAL_0000642200	0	0	0.0394917	0	0	0	0	0	0	0
923	SPAL_0000642300	0	0.0810454	0.0797984	0	0	0	0	0.0254501	0.203804	0.0666583
924	SPAL_0000644150	0.0980103	0.0546759	0.0804989	0.158391	0.100522	0.0275855	0.130606	0.0508982	0.0819881	0.134033
925	SPAL_0000644900	0	0.0277928	0	0.0262391	0	0	0	0	0	0
926	SPAL_0000648100	0.0482629	0	0	0.0269156	0	0	0.389037	0.343429	0.0819007	0
927	SPAL_0000648200	0	0	0.0406851	0	0	0	0	0.0505154	0	0
928	SPAL_0000648500	0	0	0.0398797	0.108059	0	0.028241	0	0	0	0
929	SPAL_0000649000	0.0962205	0.161383	0.0792694	0.161655	0.0674559	0	0.0646763	0.0517479	0.0408896	0.0662889
930	SPAL_0000649100	0.0481126	0.191853	0.0396363	0.0269413	0	0	0.0646787	0.129367	0	0
931	SPAL_0000652200	0	0.108264	0	0	0.289903	0.176494	0	0.0259357	0	0
932	SPAL_0000652800	0	0.0268432	0	0	0	0	0	0	0	0
933	SPAL_0000652900	0	0.0270586	0.237989	0.230799	0	0.0394163	0	0	0	0
934	SPAL_0000652975	0	0.0267832	0.0395485	0	0	0	0	0	0	0.0661179
935	SPAL_0000653000	0	0	0	0	0	0	0	0	0	0
936	SPAL_0000653400	0	0.0270707	0.039973	0.106982	0.0337126	0.0279829	0.195451	0.30924	0	0.0668257
937	SPAL_0000656200	0	0.0693849	0.0396892	0	0	0	0.0841346	0.0871064	0.106207	0.0663562
938	SPAL_0000656900	0	0.241945	0.0395792	0.0270741	0.101403	0	0.0646061	0.0778932	0.0860101	0
939	SPAL_0000657400	0	0.0808082	0	0	0.044972	0	0	0.025856	0.0409213	0.132821
940	SPAL_0000659100	0.0427272	0.064151	0	0	0	0	0	0	0.0128639	0
941	SPAL_0000659200	0.14597	0.0540969	0.0399479	0.0264703	0.0335147	0	0.130089	0.280847	0	0.0667729
942	SPAL_0000662600	0	0	0	0	0.0337161	0	0	0.208833	0	0
943	SPAL_0000663100	0	0.161459	0.0396452	0	0	0.028205	0.129396	0.285018	0	0
944	SPAL_0000663200	0.0419136	0.0280095	0.0396584	0	0	0	0	0	0.0402109	0
945	SPAL_0000663300	0	0.0271175	0	0	0	0	0	0.0282974	0	0
946	SPAL_0000664400	0	0.0540981	0.0399632	0	0.0672141	0	0	0.0513253	0.0818727	0
947	SPAL_0000667000	0	0	0	0	0	0	0	0	0.531697	0
948	SPAL_0000668100	0	0	0	0	0	0	0	0.0260163	0	0
949	SPAL_0000670400	0.0483344	0.0269848	0.0397965	0.107593	0	0.0281224	0	0.103452	0.204885	0
950	SPAL_0000673100	0	0.0268432	0	0	0	0	0	0	0	0
951	SPAL_0000673250	0	0	0	0	0	0	0.0657603	0.204095	0	0
952	SPAL_0000673300	0	0	0	0	0	0.0276837	0.196874	0.612593	0.0411732	0.0673683
953	SPAL_0000673400	0	0	0	0	0	0	0.326763	0.588678	0.0820432	0
954	SPAL_0000674400	0	0	0	0	0	0	0.0429869	0	0	0
955	SPAL_0000674600	0	0.0536864	0	0	0	0	0	0	0	0
956	SPAL_0000674800	0	0.0270116	0	0.017698	0	0	0	0	0.2286	0
957	SPAL_0000674900	0	0.0272275	0	0	0	0	0	0.0256502	0	0
958	SPAL_0000675100	0	0.0536988	0.0791349	0	0	0	0	0	0.0816244	0
959	SPAL_0000675300	0.0480077	0	0	0	0	0	0	0.0778354	0.572614	0
960	SPAL_0000675700	0	0.0314458	0	0	0.228341	0.106537	0.0577011	0	0	0
961	SPAL_0000677100	0.0963685	0.0560193	0.0796871	0.0265219	0	0	0.127054	0	0	0.194622
962	SPAL_0000682000	0	0.0806712	0.0792076	0.0270248	0.0675501	0	0.323191	0.103724	0.0409097	0.0662424
963	SPAL_0000682100	0.0481502	0.16157	0	0.0270041	0	0.0282207	0	0.0777773	0.0818948	0.0663551
964	SPAL_0000682200	0	0	0	0	0	0	0	0	0.0409	0
965	SPAL_0000682300	0	0.0537527	0.118787	0	0.033724	0	0	0	0.490442	0
966	SPAL_0000682500	0	0	0	0	0	0	0	0	0	0
967	SPAL_0000682600	0.0969356	0.404396	0.0404455	0	0.0978042	0.0833121	0	0.104829	0	0.0654593
968	SPAL_0000682925	0	0.027043	0	0	0	0	0	0.0257668	0.0409919	0
969	SPAL_0000683100	0	0.10839	0	0	0	0.028189	0	0.0259331	0	0
970	SPAL_0000683200	0	0	0	0	0	0	0	0.195573	0	0
971	SPAL_0000683500	0	0	0	0	0	0	0	0.0515196	0.123925	0
972	SPAL_0000683700	0	0	0.13947	0.0735351	0.0669996	0	0	0	0	0
973	SPAL_0000684100	0.0479758	0.0537368	0	0.0270784	0	0	0	0	0.081804	0
974	SPAL_0000685900	0.0490814	0.0392772	0	0.0389712	0	0	0	0.0511264	0	0
975	SPAL_0000686000	0	0.191327	0.0402518	0.0528256	0	0	0.295839	0.0577694	0	0
976	SPAL_0000687300	0	0	0	0	0.0334288	0	0	0	0	0.0668593
977	SPAL_0000687400	0	0.0268432	0	0	0	0	0	0	0	0
978	SPAL_0000687500	0	0	0	0	0	0	0	0.0260164	0	0
979	SPAL_0000687600	0	0.0805296	0	0	0	0	0	0	0	0
980	SPAL_0000687700	0	0.0270981	0	0	0	0	0	0.0257054	0.0410066	0
981	SPAL_0000687800	0	0	0	0	0	0	0.278715	0.523719	0	0
982	SPAL_0000687900	0	0.0817502	0	0	0	0	0	0.025629	0	0
983	SPAL_0000688100	0	0	0	0	0.0338298	0	0	0	0	0
984	SPAL_0000688700	0	0	0	0	0	0	0	0	0	0
985	SPAL_0000688800	0.0479239	0.0371754	0	0	0	0	0	0	0	0
986	SPAL_0000689100	0	0.0110439	0.164215	0.0830637	0	0	0	0	0.0448708	0
987	SPAL_0000691400	0	0	0	0	0	0	0	0	0	0
988	SPAL_0000691500	0	0	0.0397665	0.027032	0	0	0	0.02596	0	0
989	SPAL_0000691700	0	0	0	0.0444547	0	0.0282714	0	0.183579	0	0
990	SPAL_0000692000	0	0.0225759	0	0	0	0.00922421	0	0.0085048	0	0.0336707
991	SPAL_0000692400	0	0.0268432	0	0	0	0	0	0	0	0
992	SPAL_0000692700	0	0	0	0	0	0	0	0	0	0
993	SPAL_0000693000	0	0.0550922	0	0.0264714	0	0	0	0	0	0
994	SPAL_0000693400	0	0.134295	0.0395298	0.0271128	0	0.0283196	0.0645338	0	0.122707	0.13225
995	SPAL_0000694200	0	0	0	0	0	0	0.0645802	0.025976	0	0
996	SPAL_0000694300	0	0.0835138	0	0	0	0	0	0.132063	0	0
997	SPAL_0000696500	0	0.107873	0	0	0.202929	0.395362	0	0	0	0
998	SPAL_0000696600	0	0.0540038	0	0	0	0.140649	0	0	0.0409994	0
999	SPAL_0000696800	0	0.027073	0	0.0270102	0.489118	0.416275	0	0	0	0
1000	SPAL_0000697400	0.0481229	0.242211	0.0396504	0.296845	0	0.0857109	0	0	0.0409223	0
1001	SPAL_0000697600	0	0.0508385	0	0.0648648	0.0640709	0	0.0970324	0.0851403	0.0409449	0
1002	SPAL_0000697675	0	0	0	0	0	0	0	0	0	0
1003	SPAL_0000697700	0	0	0	0	0.0334714	0	0.0651529	0	0.0818249	0
1004	SPAL_0000697800	0	0	0	0	0	0	0	0	0.736201	0
1005	SPAL_0000697900	0	0.0134845	0	0	0.016836	0	0	0	0	0
1006	SPAL_0000700233	0.0488986	0.299432	0	0	0.100603	0.0276356	0	0	0	0
1007	SPAL_0000700266	0	0.057985	0	0	0	0.0278857	0.112766	0.111398	0.0410681	0
1008	SPAL_0000700800	0	0.0540667	0	0	0.0335923	0	0	0	0	0
1009	SPAL_0000701100	0	0.0542986	0	0.0805467	0	0	0	0.051729	0.0411514	0
1010	SPAL_0000701500	0	0	0	0	0.0338298	0	0	0	0	0
1011	SPAL_0000704500	0	0.0536863	0	0	0	0	0	0	0	0
1012	SPAL_0000705000	0.0489389	0.0544393	0	0.0795031	0	0.0277138	0.0653244	0.0255663	0.122994	0.0670636
1013	SPAL_0000710700	0	0	0	0	0	0	0	0	0	0
1014	SPAL_0000710800	0	0	0	0	0	0	0	0.0258473	0.0823356	0
1015	SPAL_0000710900	0	0.0268432	0	0	0	0	0	0	0	0
1016	SPAL_0000711000	0	0	0	0	0	0	0	0	0	0
1017	SPAL_0000711100	0	0	0	0	0	0	0	0	0	0
1018	SPAL_0000711600	0	0.0270093	0	0	0.0336221	0	0	0	0	0
1019	SPAL_0000711700	0	0	0.119518	0.0539594	0	0.0282048	0	0	0.0410478	0
1020	SPAL_0000711825	0	0	0	0	0	0	0	0	0.040894	0.0660744
1021	SPAL_0000712200	0	0	0	0.0270997	0	0.028324	0	0.0261124	0	0
1022	SPAL_0000712333	0	0.0270598	0	0	0	0	0	0.129042	0	0
1023	SPAL_0000712366	0.0493511	0	0	0.0267331	0	0	0.0652203	0.0253621	0	0
1024	SPAL_0000712400	0	0	0.193447	0.332505	0	0	0	0	0.300455	0
1025	SPAL_0000712700	0.0482635	0	0	0	0	0.0280043	0	0	0.0726079	0.0664298
1026	SPAL_0000713200	0	0.100443	0	0	0.0674658	0	0.0648169	0.0517096	0	0
1027	SPAL_0000714300	0.0481086	0.295928	0.118912	0.0539397	0.101245	0	0	0.129474	0	0.0662949
1028	SPAL_0000718000	0	0	0	0	0.0338299	0	0	0	0	0
1029	SPAL_0000718100	0	0	0	0	0.0338476	0	0	0.0257673	0.206373	0
1030	SPAL_0000718575	0	0	0	0	0	0	0	0	0.1227	0
1031	SPAL_0000718600	0	0.103894	0	0.0540103	0	0	0.129524	0.0259281	0.0409561	0
1032	SPAL_0000718625	0	0.0536863	0	0	0	0	0	0	0	0
1033	SPAL_0000720400	0	0	0	0	0	0	0	0.0258312	0.0411935	0
1034	SPAL_0000720600	0	0	0	0	0	0.0562559	0.1953	0.310555	0.0410667	0
1035	SPAL_0000720900	0	0	0	0	0	0	0	0	0	0
1036	SPAL_0000721100	0	0.0134216	0	0	0	0	0	0	0	0
1037	SPAL_0000721200	0	0.013711	0	0.0797705	0	0	0	0	0	0
1038	SPAL_0000721300	0	0	0	0.0271608	0	0	0	0	0	0
1039	SPAL_0000721400	0	0.0268801	0.0396025	0	0.0337251	0	0.129256	0.0258789	0.163495	0.331183
1040	SPAL_0000721675	0	0	0	0	0	0	0	0	0	0
1041	SPAL_0000724300	0	0	0	0	0	0	0	0	0	0
1042	SPAL_0000724400	0	0	0.0397217	0.0270037	0	0	0	0	0	0
1043	SPAL_0000724500	0	0.0536863	0	0	0	0	0	0	0	0
1044	SPAL_0000724600	0	0.082667	0.0401133	0	0	0.0272139	0	0	0	0
1045	SPAL_0000725900	0.0483173	6.57444e-10	0	0.0806246	0.0337336	0	0.0648829	0.180907	0	0
1046	SPAL_0000727000	0	0	0	0	0	0	0	0.0780493	0	0
1047	SPAL_0000727200	0	0	0	0.0271563	0.0338355	0	0	0	0	0
1048	SPAL_0000727300	0	0	0	0	0	0	0	0	0	0
1049	SPAL_0000727900	0	0	0	0	0	0	0	0.0270871	0	0.0671091
1050	SPAL_0000728100	0.048567	0.0270865	0	0.0268981	0.0338209	0.0562625	0	0.0258881	0	0
1051	SPAL_0000730700	0	0.0685632	0.101046	0.0565882	0.0168375	0.0277268	0.0327956	0.0400932	0.226485	0
1052	SPAL_0000732800	0	0.055317	0.040499	0.0791467	0.0333227	0	0	0.0507005	0.0410267	0.066939
1053	SPAL_0000761700	0	0.0539151	0	0	0	0	0	0	0.122179	0
1054	SPAL_0000761800	0	0	0	0	0	0	0	0	0.0408999	0
1055	SPAL_0000762200	0	0	0	0	0	0	0	0.0260163	0	0
1056	SPAL_0000762300	0	0.0425172	0	0	0	0	0	0.0780934	0.0816338	0
1057	SPAL_0000762400	0	0	0	0	0	0	0	0.0407729	0	0
1058	SPAL_0000762500	0	0	0	0	0	0	0	0	0	0
1059	SPAL_0000762700	0	0	0	0	0	0	0	0	0	0
1060	SPAL_0000762800	0.0961139	0.053486	0	0	0	0	0	0	0	0
1061	SPAL_0000762950	0	0.0542736	0	0.0798798	0.0673444	0	0.130596	0.0256867	0	0.0670046
1062	SPAL_0000763000	0	0.161972	0	0.107353	0.0337264	0	0.0649431	0.103293	0.163881	0.0665994
1063	SPAL_0000763100	0	0.0268432	0	0	0	0	0	0	0	0
1064	SPAL_0000763200	0	0	0	0	0	0	0	0	0.0537636	0
1065	SPAL_0000763250	0	0.203703	0	0.409123	0.0468147	0.0559378	0.0657464	0.160761	0	0
1066	SPAL_0000764400	0	0	0	0	0	0	0	0	0	0
1067	SPAL_0000764500	0	0.0268433	0	0	0	0	0	0	0	0
1068	SPAL_0000764600	0.192045	0.153743	0	0	0	0	0.190935	0.228582	0	0
1069	SPAL_0000766584	0	0.171631	0.0405774	0.0270639	0.098853	0.027694	0.0646494	0.151088	0.0408008	0.0659821
1070	SPAL_0000766900	0	0	0	0.0543218	0	0	0	0	0	0
1071	SPAL_0000767100	0.0481075	0.139322	0.0396386	0.0189839	0	0	0	0.0562944	0	0
1072	SPAL_0000767900	0	0	0	0	0	0	0	0	0	0
1073	SPAL_0000768200	0.0966788	0.111455	0.0798837	0	0	0.0543217	0	0	0.362993	0
1074	SPAL_0000769200	0.048011	0.140277	0	0.0270751	0.074405	0.104374	0.130387	0.0380282	0.0455794	0.314731
1075	SPAL_0000769475	0	0.0539691	0	0	0.0673786	0	0.194775	0.10314	0.0818828	0
1076	SPAL_0000769900	0	0.0539371	0	0	0.236017	0	0.19462	0.464858	0	0
1077	SPAL_0000772750	0	0.0545962	0	0.133455	0	0.0558461	0	0.0772358	0.0824217	0.0673764
1078	SPAL_0000773900	0.04932	0	0	0.0265085	0.033654	0	0.0656701	0.0255545	0	0
1079	SPAL_0000774000	0	0.133454	0	0.0052472	0	0.195677	0	0	0	0
1080	SPAL_0000774200	0.096843	0	0	0.053615	0	0	0	0.108254	0.100358	0.297139
1081	SPAL_0000791800	0.0247444	0	0	0.0133947	0	0.0280148	0	0.0258443	0	0
1082	SPAL_0000792200	0	0	0.0396196	0	0	0	0	0	0.183463	0
1083	SPAL_0000792300	0	0	0	0	0	0	0	0.0260164	0	0
1084	SPAL_0000792900	0	0	0	0	0	0	0	0.104066	0	0
1085	SPAL_0000793000	0	0	0	0.0271609	0	0	0	0	0	0
1086	SPAL_0000793200	0	0.162432	0.0799763	0	0.134383	0	0	0.102526	0.163761	0
1087	SPAL_0000793400	0.103197	0.0671897	0.0547515	0	0	0	0.0715883	0.103003	0	0.146561
1088	SPAL_0000793900	0.0485634	0	0.0399235	0.0266204	0	0	0.155568	0.0313649	0	0
1089	SPAL_0000795000	0	0.148502	0.0792546	0	0	0.0282034	0	0	0.0818156	0
1090	SPAL_0000796100	0	0.0542392	0.120115	0.0268283	0.101391	0.0280667	0	0	0	0
1091	SPAL_0000796300	0.0478718	0.0268463	0	0	0	0	0	0	0	0
1092	SPAL_0000796400	0	0	0	0	0	0	0	0	0	0
1093	SPAL_0000796700	0	0.0555118	0	0.065125	0	0.0282658	0	0.0611609	0.201747	0
1094	SPAL_0000796900	0.0480633	0	0.0792295	0.0357308	0	0.0282603	0.0806794	0.0594929	0.0669201	0
1095	SPAL_0000797000	0	0.0545515	0	0	0	0	0	0.025605	0	0
1096	SPAL_0000797100	0	0.0539832	0.159361	0	0.0336754	0	0	0.0515312	0	0
1097	SPAL_0000797200	0	0	0	0.0303751	0	0	0	0	0.0459157	0
1098	SPAL_0000798800	0.0487089	0.0270816	0.0800137	0.0265831	0.100828	0.0278118	0.065165	0.0256426	0.245735	0.0668751
1099	SPAL_0000799100	0	0	0	0	0	0	0	0	0	0
1100	SPAL_0000799200	0	0.0268431	0	0	0	0	0	0	0	0
1101	SPAL_0000799300	0	0.0268501	0.0395193	0	0.0675834	0	0.193545	0	0.24531	0
1102	SPAL_0000799400	0	0.0583611	0	0	0	0.0461163	0.12961	0.0518462	0	0
1103	SPAL_0000799500	0	0.0269078	0.118905	0.027018	0.0675638	0	0	0	0.0409279	0
1104	SPAL_0000799525	0	0	0	0	0	0	0	0	0	0
1105	SPAL_0000799575	0	0	0	0	0	0	0	0	0	0
1106	SPAL_0000799900	0	0	0	0	0	0	0	0.055705	0	0
1107	SPAL_0000800000	0	0	0	0.0538938	0	0.0281726	0.194929	0.336763	0.150431	0.0666155
1108	SPAL_0000800900	0	0	0	0	0	0	0	0.0257116	0.0413857	0
1109	SPAL_0000801000	0	0.0814604	0	0	0	0	0	0.113652	0	0
1110	SPAL_0000801300	0	0.0539287	0	0.0270389	0	0	0	0	0	0
1111	SPAL_0000801400	0	0	0	0	0	0	0	0	0	0
1112	SPAL_0000801500	0	0.0268432	0	0	0	0	0	0	0	0
1113	SPAL_0000801800	0	0.0459989	0	0.061806	0.0176216	0	0	0.0258457	0.0638438	0
1114	SPAL_0000803900	0	0	0	0	0	0	0.0649617	0.153759	0.12258	0.0666425
1115	SPAL_0000804300	0	0.0536863	0	0	0	0	0	0	0	0
1116	SPAL_0000804400	0	0	0	0	0	0	0	0.0266361	0.0452501	0
1117	SPAL_0000804600	0	0.0805518	0.197584	0.0271064	0	0	0.064513	0	0	0.0661036
1118	SPAL_0000804900	0	0.107379	0	0	0	0	0	0	0.122653	0.0660863
1119	SPAL_0000805000	0	0	0	0	0	0	0	0	0	0
1120	SPAL_0000805300	0	0.0805517	0	0	0	0	0	0	0.0408887	0
1121	SPAL_0000805500	0	0.0856943	0.0898804	0.0528624	0.12712	0	0	0	0.0307833	0.0505839
1122	SPAL_0000805600	0	0	0	0	0	0	0	0	0	0
1123	SPAL_0000805700	0	0	0	0	0	0	0	0	0	0
1124	SPAL_0000806000	0.0485282	0	0	0	0	0	0	0.0331823	0.0409036	0
1125	SPAL_0000806100	0	0	0	0	0	0.00943022	0	0.00869475	0	0
1126	SPAL_0000807825	0	0	0	0.0819089	0	0	0	0	0.0406872	0
1127	SPAL_0000807850	0	0	0	0	0	0.0569063	0	0	0	0.0658592
1128	SPAL_0000807875	0	0.027991	0	0.0532575	0	0.0555114	0	0	0	0
1129	SPAL_0000808600	0	0	0	0	0	0	0.0644801	0	0	0
1130	SPAL_0000808800	0	0	0.0402873	0.0265899	0	0.027812	0.131029	0	0.411231	0
1131	SPAL_0000814500	0	0	0	0	0	0	0	0.988906	0	0
1132	SPAL_0000814800	0	0	0.0791921	0.0811504	0.0337902	0	0.0599087	0.0328164	0.102036	0.0662309
1133	SPAL_0000814900	0	0.0812429	0	0	0	0	0	0.0515767	0	0
1134	SPAL_0000815000	0	0	0.0395805	0	0	0	0.0645991	0.0813397	0	0
1135	SPAL_0000815100	0	0	0	0	0	0	0.0653545	0.0254558	0.0412458	0
1136	SPAL_0000815300	0	0	0	0	0	0	0	0.0260561	0	0.066457
1137	SPAL_0000815600	0	0	0	0	0	0	0	0	0	0
1138	SPAL_0000815700	0	0	0	0	0	0	0	0.0145883	0	0
1139	SPAL_0000815900	0	0	0	0.0271219	0.0677138	0.0283338	0	0.0260088	0.0947354	0
1140	SPAL_0000816000	0	0	0	0	0.0338592	0	0	0.0259942	0	0
1141	SPAL_0000816200	0.0494984	0.0576556	0.040785	0.0269649	0	0.139469	0	0.0800929	0	0
1142	SPAL_0000816925	0	0	0	0	0	0	0	0.0253384	0.21	0
1143	SPAL_0000817000	0	0.0272125	0	0	0.033372	0	0	0	0	0
1144	SPAL_0000817100	0	0.0564354	0	0.0280277	0.183483	0.145052	0	0	0	0
1145	SPAL_0000817300	0	0.0537361	0	0	0.0676082	0	0.064562	0.103899	0.12272	0
1146	SPAL_0000817500	0	0	0	0	0	0	0	0	0	0
1147	SPAL_0000817800	0.193376	0.0278274	0.0399268	0	0	0	0.1917	0.212226	0	0
1148	SPAL_0000817900	0	0.0123606	0	0	0	0	0	0	0	0
1149	SPAL_0000818850	0	0	0.0407409	0.0826769	0.0328058	0.0560364	0	0	0.0408141	0
1150	SPAL_0000825200	0.0545078	0.214551	0.079402	0.163444	0.0882683	0.067587	0	0	0.040918	0.232829
1151	SPAL_0000825250	0	0	0	0	0	0	0	0	0.517727	0.0332374
1152	SPAL_0000825300	0	0	0	0.0540345	0	0.0282556	0	0	0.0825527	0
1153	SPAL_0000825400	0	0	0	0	0	0	0	0	0	0
1154	SPAL_0000825500	0	0	0	0.0659651	0	0	0	0.0334654	0	0
1155	SPAL_0000825600	0	0.107502	0.0791848	0	0	0	0.129226	0.12942	0.0408713	0
1156	SPAL_0000825825	0	0.0554829	0	0	0.0329114	0	0	0	0.081383	0
1157	SPAL_0000826000	0	0.108561	0	0.0301363	0	0	0	0.0403842	0	0.06628
1158	SPAL_0000826500	0	0	0	0	0	0	0	0	0	0
1159	SPAL_0000826700	0.0976681	0.0567747	0	0	0	0.0275051	0	0.025078	0.0812486	0
1160	SPAL_0000826800	0.0481097	0.0537783	0	0	0	0	0	0.0775398	0	0
1161	SPAL_0000826900	0	0.0268432	0	0	0	0	0	0	0	0
1162	SPAL_0000827600	0.0485296	0.0270916	0	0	0.0331408	0	0.0215388	0	0.422946	0.132674
1163	SPAL_0000827700	0.0241979	0.148339	0.119434	0.103051	0.117712	0.0279473	0.0324501	0	0.171766	0.155319
1164	SPAL_0000827900	0	0.0548167	0.0402628	0	0.167293	0.0275596	0	0	0	0
1165	SPAL_0000828000	0	0.10348	0	0.0537858	0.0436821	0	0.2791	0	0.252913	0.132805
1166	SPAL_0000828075	0	0	0	0	0	0	0	0.0260163	0	0
1167	SPAL_0000828100	0	0	0.176096	0.0810427	0	0.0282326	0	0.0259393	0.204907	0.13285
1168	SPAL_0000829200	0	0.121136	0.0406989	0.0810095	0.100248	0.189293	0	0.248586	0.0411504	0.146273
1169	SPAL_0000829500	0	0.0315845	0	0	0.0708663	0.0358404	0	0.0424627	0.0910928	0
1170	SPAL_0000829700	0	0	0	0	0	0	0	0	0	0
1171	SPAL_0000829800	0	0.0356107	0	0	0	0	0	0.108217	0	0
1172	SPAL_0000830100	0.0484752	0.0539604	0	0	0.0332456	0	0	0	0	0
1173	SPAL_0000830200	0	0	0.0396764	0.0967392	0	0	0.0647351	0	0.225382	0
1174	SPAL_0000830400	0	0.0467148	0	0	0	0	0	0	0.0727461	0
1175	SPAL_0000830525	0	0.189576	0	0	0.0335318	0	0	0	0	0
1176	SPAL_0000830800	0	0	0	0	0	0	0	0	0	0
1177	SPAL_0000830900	0	0	0	0	0	0	0	0	0.0446181	0
1178	SPAL_0000833900	0	0.193036	0	0	0	0.0279055	0	0.0772361	0	0
1179	SPAL_0000834000	0	0.0992897	0.0395424	0.0271213	0.0338209	0	0	0.0317756	0.122747	0
1180	SPAL_0000834100	0	0.111335	0	0.0803325	0	0.0839617	0	0.154812	0	0
1181	SPAL_0000834600	0	0.0555316	0.0405986	0.0264376	0.0333729	0	0	0.0253878	0.0410905	0
1182	SPAL_0000834700	0.0984373	0.133428	0	0.0927514	0.132787	0	0	0.101227	0	0
1183	SPAL_0000835200	0	0	0	0	0	0	0	0	0.0406504	0.0664712
1184	SPAL_0000835500	0	0	0	0	0	0	0	0	0	0
1185	SPAL_0000835600	0	0	0	0	0	0	0	0	0.0408999	0
1186	SPAL_0000836800	0	0	0.0397621	0	0	0	0.129609	0.0768665	0.0407924	0.0664721
1187	SPAL_0000837700	0.0961757	0	0.039631	0.0270337	0.0337916	0	0	0.0518836	0.0409331	0
1188	SPAL_0000837800	0	0	0	0	0	0	0.0656462	0.0255559	0	0
1189	SPAL_0000837900	0.0479941	0.0268748	0.0395664	0.135353	0	0	0	0.233639	0	0
1190	SPAL_0000838000	0.0480179	0.107522	0	0	0	0.0366191	0.193817	0.168378	0.0409061	0
1191	SPAL_0000838200	0	0.0272461	0	0.0268215	0	0.0280674	0	0	0.082483	0
1192	SPAL_0000838300	0	0	0	0.012849	0.0339566	0	0	0	0	0
1193	SPAL_0000838700	0	0	0	0.0267381	0.0338494	0	0.198606	0.0771926	0	0
1194	SPAL_0000838725	0	0.0276801	0	0.0265561	0	0	0	0.178886	0.0826274	0
1195	SPAL_0000838900	0	0	0	0	0	0	0	0	0	0
1196	SPAL_0000839000	0	0.0316964	0	0	0.0406836	0	0	0.103181	0	0
1197	SPAL_0000841650	0	0	0	0	0	0	0	0	0	0
1198	SPAL_0000843600	0	0.00334433	0	0	0	0	0.137143	0	0	0
1199	SPAL_0000844100	0.0959251	0.188075	0	0.0271022	0.0338091	0	0.193678	0.103923	0.0818186	0
1200	SPAL_0000844125	0	0	0	0	0	0	0	0	0	0
1201	SPAL_0000845900	0	1.94325e-05	0.320171	0	0	0	0.199576	0	0	0
1202	SPAL_0000846000	0	0	0	0	0	0	0.0645284	0	0.163477	0
1203	SPAL_0000846500	0	0.0269934	0	0.162059	0	0	0	0	0	0
1204	SPAL_0000847400	0.0485172	0	0.0399172	0.0536104	0.0814977	0.0280382	0.195219	0.283893	0.0410151	0
1205	SPAL_0000848200	0	0	0	0.0541786	0	0	0	0.0782552	0	0
1206	SPAL_0000848400	0	0.0554257	0	0.0266536	0	0	0	0.0256853	0	0
1207	SPAL_0000848700	0	0	0	0	0	0	0	0.0260163	0	0
1208	SPAL_0000849700	0	0	0	0	0.0364857	0	0	0.0241498	0	0
1209	SPAL_0000850000	0	0.0241391	0	0.0127428	0.054323	0	0	0	0	0
1210	SPAL_0000850050	0	0.136244	0.120684	0.106248	0	0	0	0.0256277	0.0821442	0
1211	SPAL_0000850200	0	0	0	0	0.0675364	0.0278002	0	0	0	0.0675379
1212	SPAL_0000852100	0	0.0276719	0	0	0.0668238	0	0	0.152541	0.0411215	0
1213	SPAL_0000852200	0	0	0	0	0	0	0	0.130082	0	0
1214	SPAL_0000852250	0	0	0	0	0	0	0	0	0	0.066065
1215	SPAL_0000852300	0	0	0	0	0	0	0	0	0	0
1216	SPAL_0000853000	0	0	0	0	0.0339045	0.0282255	0	0	0.0410743	0
1217	SPAL_0000853200	0	0.0269304	0	0	0	0	0	0	0.0407675	0
1218	SPAL_0000853300	0	0	0.202606	0.294962	0.0339678	0.028055	0	0.129334	0	0
1219	SPAL_0000853325	0	0	0.121087	0.16132	0	0.0281353	0	0.0518552	0	0
1220	SPAL_0000853800	0.0483072	0.143968	0	0	0.0803706	0.17964	0	0	0	0
1221	SPAL_0000854300	0	0	0	0	0	0	0	0.0583523	0	0
1222	SPAL_0000868700	0.12311	0.0268885	0.0396679	0	0.0672101	0	0.129364	0.0790861	0.237399	0.243839
1223	SPAL_0000868800	0	0	0.0401653	0	0.033702	0	0	0.0256789	0	0
1224	SPAL_0000869200	0.0485421	0.0271275	0	0	0.033021	0	0	0	0	0
1225	SPAL_0000870500	0	0.0848854	0	0	0	0	0	0.0246948	0	0
1226	SPAL_0000870600	0	0.134702	0	0.0269523	0	0.0281717	0.129573	0	0.0818876	0.0664066
1227	SPAL_0000870900	0.0665858	0.0267327	0	0	0	0	0	0	0	0
1228	SPAL_0000871800	0	0	0	0	0	0	0.0645581	0	0.0408505	0
1229	SPAL_0000875200	0.0978722	0.0544621	0	0.0529694	0.167939	0	0.0653027	0.127744	0.24596	0
1230	SPAL_0000877200	0	0.0269373	0	0	0	0	0	0.0517956	0.112608	0
1231	SPAL_0000877300	0.144705	0.260611	0	0.0549056	0	0.111195	0.0635951	0.0746992	0.0403667	0
1232	SPAL_0000878100	0	0.0274429	0	0	0	0	0	0	0.0400101	0
1233	SPAL_0000878300	0	0	0	0	0	0	0	0	0.0409	0
1234	SPAL_0000878400	0	0.107505	0	0.0295057	0.183762	0.0283301	0	0.161573	0.327409	0.132341
1235	SPAL_0000881000	0	0.0352488	0	0.0358238	0	0	0	0.103821	0	0
1236	SPAL_0000881100	0	0.0250413	0	0	0	0	0	0.167495	0	0
1237	SPAL_0000881500	0	0.0269393	0.0397189	0	0.0337216	0	0	0.025846	0.134862	0
1238	SPAL_0000881600	0	0	0	0.0541777	0	0	0	0.0653886	0.0553117	0
1239	SPAL_0000881700	0.0958723	0.0805767	0.0790586	0.0271144	0	0	0	0.103949	0.204514	0
1240	SPAL_0000882275	0	0.0269118	0	0	0	0	0	0	0	0.0658968
1241	SPAL_0000882300	0	0.0415285	0	0.0131692	0	0	0	0	0.0204525	0
1242	SPAL_0000882400	0	0.0811796	0	0	0	0	0	0	0.0408811	0.0660908
1243	SPAL_0000882800	0	0.0268431	0	0	0	0	0	0	0	0
1244	SPAL_0000882950	0.0488667	0.054533	0.0401339	0.157868	0	0.0549912	0	0	0	0.0668339
1245	SPAL_0000883000	0	0	0.0803312	0.0269219	0.033909	0.0281657	0	0.0259311	0	0
1246	SPAL_0000890600	0	0	0	0	0	0	0	0	0	0
1247	SPAL_0000890700	0	0.0268882	0.06938	0.0401528	0.0337683	0	0	0	0.471204	0.176216
1248	SPAL_0000890900	0	0.0271846	0	0	0	0	0	0.0256904	0	0
1249	SPAL_0000897900	0	0	0	0	0	0	0	0	0.2045	0
1250	SPAL_0000901800	0.0491356	0	0	0.052867	0.0335546	0	0.0654232	0.101909	0	0.0671653
1251	SPAL_0000901900	0	0	0.316998	0.270817	0.0338232	0	0	0.0259767	0.0409527	0
1252	SPAL_0000902000	0	0.0537698	0	0	0	0	0	0.0259128	0.0408952	0.0655869
1253	SPAL_0000902100	0	0	0	0.0268326	0	0	0	0	0.00989013	0
1254	SPAL_0000903350	0	0.0818503	0	0	0	0	0	0.0255979	0	0
1255	SPAL_0000903550	0.0932686	0.196552	0	0.0266698	0	0	0	0	0	0
1256	SPAL_0000905950	0.0489937	0.0355524	0	0	0	0.0274267	0.194965	0.579886	0	0
1257	SPAL_0000906150	0	0.256397	0	0.0269473	0.131984	0.110589	0	0	0.0408502	0.0661734
1258	SPAL_0000907850	0	0	0	0	0	0	0	0	0	0
1259	SPAL_0000908000	0	0.134544	0.0811855	0.0270361	0.0337888	0.0564852	0.0646856	0.077823	0.450258	0.0662923
1260	SPAL_0000911450	0	0.0276675	0	0	0	0	0	0.0251383	0	0.0663567
1261	SPAL_0000912550	0	0	0	0	0	0	0	0.0520327	0	0
1262	SPAL_0000912650	0	0	0	0	0.0338605	0	0	0.0259928	0	0
1263	SPAL_0000916300	0	0.0269396	0.158732	0.0540896	0	0.0565216	0	0.155745	0.327795	0
1264	SPAL_0000920900	0	0	0	0	0	0	0	0	0.138193	0
1265	SPAL_0000922600	0	0.0269507	0.0841776	0.0288201	0	0.0563939	0	0.0329175	0.0409647	0.0664271
1266	SPAL_0000923650	0	0.0407844	0	0.0531861	0.0862462	0	0	0.0256228	0.0413314	0
1267	SPAL_0000923900	0	0	0	0	0	0	0	0	0	0
1268	SPAL_0000924000	0	0	0	0	0	0	0	0	0.2454	0
1269	SPAL_0000924600	0	0.0723133	0	0.0136442	0	0.0138715	0	0.0124538	0	0.0652979
1270	SPAL_0000927350	0	0	0	0	0	0	0	0	0	0
1271	SPAL_0000927400	0	0.13505	0	0	0	0	0	0.0258559	0	0
1272	SPAL_0000927500	0	0	0	0	0	0	0	0	0	0
1273	SPAL_0000927600	0.0558883	0.0557796	0.0839368	0	0	0.0281464	0.0799438	0.220879	0.361988	0
1274	SPAL_0000927900	0	2.78226e-05	0	0	0.0546578	0	0.0646099	0.0778637	0	0
1275	SPAL_0000928100	0.0484349	0.108032	0.0398596	0.026803	0.033711	0.0280332	0	0	0.122916	0
1276	SPAL_0000928600	0.0482009	0.053879	0	0.10782	0.0864523	0.0281744	0.0647836	0.133078	0.163774	0.0664031
1277	SPAL_0000928900	0.0978624	0.16844	0.0404167	0.0265782	0	0.0274511	0	0.0251508	0.0408273	0.13247
1278	SPAL_0000929700	0	0	0	0	0.169149	0	0	0	0	0
1279	SPAL_0000933100	0	0.164641	0.121346	0.0531316	0.168671	0.0833694	0	0	0	0
1280	SPAL_0000934400	0	0.161596	0.0793537	0.0540416	0.168996	0.0282371	0.0647511	0.0855922	0.122875	0
1281	SPAL_0000934425	0	0	0	0	0	0	0	0	0	0
1282	SPAL_0000934500	0	0	0	0	0	0	0.0657625	0.0510224	0	0
1283	SPAL_0000934900	0	0	0	0	0	0	0	0.0260163	0	0
1284	SPAL_0000935000	0	0.0809179	0	0	0.101464	0.0847074	0	0	0	0
1285	SPAL_0000935600	0	0.0548128	0.0401449	0.157068	0	0	0	0	0	0
1286	SPAL_0000936100	0.0490206	0.323446	0	0.0528744	0.0671216	0	0.0653687	0.0764888	0	0
1287	SPAL_0000936300	0	0.0537457	0	0	0	0	0	0	0.0408548	0
1288	SPAL_0000936900	0	0.07329	0	0	0.100531	0	0.0652771	0.0254688	0.0819493	0
1289	SPAL_0000937400	0.0486962	0.0270702	0.0799609	0	0.100488	0.0276575	0.130084	0.076506	0.040844	0.133588
1290	SPAL_0000938000	0	0	0	0	0	0	0	0	0	0
1291	SPAL_0000938100	0.0480661	0.295833	0.237674	0.0270148	0.101313	0.0282281	0	0	0.0818209	0.132511
1292	SPAL_0000938300	0	0	0	0	0	0	0	0	0	0
1293	SPAL_0000938400	0.0480261	0.0536474	0.0395484	0	0	0	0	0	0.0407445	0
1294	SPAL_0000938475	0	0.107388	0	0	0	0	0	0	0	0.0660558
1295	SPAL_0000938775	0	0.0508171	0.0404181	0	0	0.0548365	0	0.0591808	0	0.0665684
1296	SPAL_0000938800	0	0.0270276	0.0798383	0	0	0	0	0.0272511	0	0
1297	SPAL_0000938900	0.0309013	0.0424007	0.0795948	0.0537216	0.0337296	0.0280858	0	0.153516	0.0409589	0.066547
1298	SPAL_0000939000	0	0.190377	0	0.0267791	0.0676225	0.0280215	0.0654555	0.0258213	0.0411706	0
1299	SPAL_0000939200	0	0.0359096	0.115728	0.0331591	0.100082	0.0890425	0	0.169267	0	0
1300	SPAL_0000939400	0.144015	0.0805467	0.118664	0	0.0673813	0	0	0	0.0408289	0.0661574
1301	SPAL_0000939500	0	0.0281567	0.0401128	0.0266334	0	0	0	0.0249257	0	0
1302	SPAL_0000939750	0	0.229425	0	0.0814647	0.0662891	0.0277869	0	0.0253349	0.082081	0
1303	SPAL_0000940800	0	0	0	0	0	0	0	0.0260163	0	0
1304	SPAL_0000940900	0	0.0223395	0	0	0	0	0	0	0	0
1305	SPAL_0000941000	0	0	0.0395758	0	0.135167	0.0282731	0	0	0.163637	0.0661982
1306	SPAL_0000941100	0	0.0269904	0.0397911	0.0269548	0.033794	0	0	0.0259047	0	0
1307	SPAL_0000941700	0	0.150039	0	0	0.0337191	0.0280406	0.0649922	0.283867	0	0.0666508
1308	SPAL_0000941800	0	0	0	0	0	0	0	0	0	0
1309	SPAL_0000941900	0	0	0	0	0	0	0	0.0779387	0.0476177	0
1310	SPAL_0000942000	0	0.0269971	0	0	0	0	0	0.0516455	0.0819441	0
1311	SPAL_0000942200	0.147367	0.027899	0	0.0529122	0.132809	0	0.0650941	0.277967	0.0409752	0
1312	SPAL_0000942500	0	0	0	0	0	0	0	0	0	0
1313	SPAL_0000942600	0	0.000208115	0.11929	0.0268201	0.0673763	0	0.0648384	0	0.0818297	0
1314	SPAL_0000948075	0	0	0	0	0	0.0280502	0	0	0.45495	0
1315	SPAL_0000948100	0	0	0	0	0	0	0	0	0	0
1316	SPAL_0000948200	0	0.0274669	0	0	0	0	0	0.0528761	0	0
1317	SPAL_0000948233	0	0.0268432	0	0	0	0	0	0	0	0
1318	SPAL_0000948266	0	0	0	0	0	0	0	0	0	0
1319	SPAL_0000948300	0	0.0270478	0	0	0	0	0	0	0.0405909	0
1320	SPAL_0000948400	0	0.026958	0	0.0270455	0	0	0	0	0	0
1321	SPAL_0000948600	0	0.0810636	0	0	0.0334027	0	0.0648767	0	0	0
1322	SPAL_0000955650	0.0487153	0.0270811	0.0399987	0.0265479	0	0	0	0.025609	0	0
1323	SPAL_0000955800	0	0	0	0	0	0	0	0	0	0
1324	SPAL_0000956000	0	0	0	0	0	0	0	0	0.149063	1.32287e-08
1325	SPAL_0000956200	0	0	0.0677727	0	0	0	0	0	0.261054	0.0330681
1326	SPAL_0000956300	0	0	0.171	0.242516	0.0338297	0.0282704	0	0	0.0819754	0
1327	SPAL_0000956700	0	0	0	0	0	0	0	0.0328538	0	0
1328	SPAL_0000956900	0	0	0	0	0	0	0	0	0	0
1329	SPAL_0000957000	0	0	0.040122	0.0798893	0	0	0	0	0.0410644	0
1330	SPAL_0000957700	0.0962016	0.0163335	0.0404478	0	0.0323254	0.00243752	6.51526e-05	0	0.20142	0.32539
1331	SPAL_0000958300	0	0.0538701	0.0397672	0	0	0	0.0648254	0.0256591	0.489912	0
1332	SPAL_0000958600	0	0	0	0	0	0	0	0	0.0834203	0
1333	SPAL_0000958800	0	0	0	0.0269307	0	0	0	0	0.12375	0
1334	SPAL_0000958900	0	0.0811331	0	0	0.0672525	0	0	0.102724	0.0409426	0.0667688
1335	SPAL_0000959000	0	0.0269148	0	0	0	0	0	0	0.040791	0
1336	SPAL_0000959300	0	0.103631	0	0	0.0337531	0.084443	0	0	0	0.0664531
1337	SPAL_0000959600	0	0.0540728	0	0.0268734	0	0.0562068	0	0	0.123092	0.200109
1338	SPAL_0000959700	0	0.0808748	0.0796491	0.0793858	0	0	0.0648681	0	0	0.266281
1339	SPAL_0000959800	0	0	0	0	0	0	0	0.025932	0.041033	0
1340	SPAL_0000960075	0	0.0278651	0	0	0	0	0	0.0175538	0	0
1341	SPAL_0000960200	0	0.376236	0	0	0.0168935	0.0282705	0.137209	0	0	0.0330922
1342	SPAL_0000960300	0.096065	0.0268801	0	0.0270186	0	0	0.129225	0.0518485	0.081791	0.0662154
1343	SPAL_0000960400	0.0479635	0.0268678	0.0790951	0.0813	0	0.0283081	0	0.337653	0.204542	0.132307
1344	SPAL_0000960500	0	0	0.0396171	0	0.0337228	0	0	0	0	0
1345	SPAL_0000960700	0.0483466	0.24303	0.039954	0.0810664	0	0.057423	0	0	0.040899	0.133545
1346	SPAL_0000960800	0	0.0822439	0.0807458	0	0	0.0276849	0	0.0255392	0	0
1347	SPAL_0000960850	0	0	0	0	0.0338299	0	0	0	0	0
1348	SPAL_0000960900	0.047989	0.0267738	0.039502	0	0	0	0	0	0	0
1349	SPAL_0000961000	0.0482147	0.21907	0	0.0268558	0	0	0.129519	0.154906	0.12267	0.0663939
1350	SPAL_0000961300	0	0	0	0.0532605	0	0	0.0659211	0.0512722	0.0414188	0
1351	SPAL_0000961600	0.0497148	0.0356006	0.0400925	0.0556295	0.033341	0	0	0	0.611068	0
1352	SPAL_0000961700	0	0.0960894	0	0	0	0.0282945	0.171037	0.0567199	0	0
1353	SPAL_0000961800	0	0.0268432	0	0	0	0	0	0	0	0
1354	SPAL_0000961900	0	0.0271637	0	0	0.0337495	0	0	0.0515429	0	0
1355	SPAL_0000962000	0	0.0808797	0.0407777	0.0268382	0	0	0	0	0.0409275	0
1356	SPAL_0000962700	0	0.0271774	0.0401012	0.02642	0	0	0	0	0.0332147	0
1357	SPAL_0000962800	0.162878	0.0181092	0.0935929	0.0264912	0.0447783	0.0184743	0.0434856	0.0596489	0.150179	0.11162
1358	SPAL_0000962900	0.0490296	0.0136328	0.0603738	0.0265647	0.0505258	0.0416786	0	0.0640842	0.102711	0
1359	SPAL_0000963700	0	0.0271215	0	0	0	0	0	0.12875	0	0
1360	SPAL_0000963800	0	0	0	0	0	0	0	0	0.000354844	0.00513883
1361	SPAL_0000964100	0	0.0538468	0.0793351	0.026993	0.135104	0	0	0.103666	0	0.0663452
1362	SPAL_0000964200	0	0.0815896	0	0	0.0337232	0.0836325	0.0654252	0.051418	0.0822095	0
1363	SPAL_0000965800	0	0	0	0	0	0	0.064718	0.0518418	0	0
1364	SPAL_0000965900	0	0.0310213	0.039758	0.0232397	0.0710443	0	0.110751	0.0768451	0	0
1365	SPAL_0000966200	0	0.0546405	0	0	0.033745	0.027837	0.131163	0.0603561	0	0
1366	SPAL_0000966500	0	0.026861	0	0	0	0	0	0	0.613094	0
1367	SPAL_0000966600	0	0	0	0	0	0	0	0.0434281	0	0
1368	SPAL_0000971600	0	0	0	0	0	0	0	0	0.817998	0
1369	SPAL_0000971700	0	0	0	0	0	0	0	0	0	0
1370	SPAL_0000972500	0.0481179	0.0268914	0.158538	0.0538016	0	0	0	0	0.163474	0
1371	SPAL_0000972600	0	0	0	0	0	0	0	0	0.163599	0
1372	SPAL_0000973900	0.0482081	0.0269476	0	0.0269778	0.0337815	0	0	0.0259116	0.573455	0
1373	SPAL_0000974600	0	0	0	0	0	0	0	0.0519104	0.378427	0
1374	SPAL_0000978700	0	0.194277	0.119413	0.164999	0	0.0280935	0.0649132	0.118777	0	0.0665609
1375	SPAL_0000979400	0.000216502	0.0582667	0	0	0.0336944	0	0	0.0282957	0.185543	0
1376	SPAL_0000980000	0	0.0864965	0	0.0272203	0.032693	0.110832	0	0	0.0405639	0.131371
1377	SPAL_0000980100	0	0.0843428	0.0400975	0	0	0	0	0.0271983	0.203957	0
1378	SPAL_0000980660	0.049066	0	0	0.0279258	0.0329956	0	0	0.0506573	0	0
1379	SPAL_0000980670	0.0490689	0.0843058	0	0.106472	0.033052	0	0	0.0504506	0.0408944	0.0664402
1380	SPAL_0000980680	0	0	0	0	0	0	0	0.0260163	0	0
1381	SPAL_0000980690	0	0	0	0	0	0	0	0	0	0
1382	SPAL_0000980700	0	0.0313048	0.0399515	0	0	0	0	0.135316	0	0
1383	SPAL_0000980900	0	0	0	0	0	0	0	0	0	0
1384	SPAL_0000981000	0	0	0	0	0	0	0	0	0	0
1385	SPAL_0000984600	0	0.0541098	0.0399726	0.0532034	0	0	0	0	0.0818793	0
1386	SPAL_0000984700	0	0.0271495	0	0.0266807	0	0	0.0653363	0.0257378	0.164296	0
1387	SPAL_0000984800	0	0	0.039617	0	0	0	0.0642763	0	0	0
1388	SPAL_0000984900	0.195775	0.191204	0.0401749	0.052683	0.03344	0	0.0651934	0.0761702	0	0
1389	SPAL_0000995700	0	0.000161346	0	0	0	0	0	0.0259663	0	0
1390	SPAL_0000995900	0.197644	0.0833896	0	0.0265508	0.0670758	0.0277038	0	0.178575	0.0412903	0
1391	SPAL_0001001850	0	0	0.0409	0	0	0	0	0.0502532	0	0
1392	SPAL_0001003450	0.0977843	0.0826118	0.0403214	0.0262666	0.0663533	0	0.0650574	0.0504782	0	0.0666455
1393	SPAL_0001010150	0	0	0	0	0	0	0	0	0	0
1394	SPAL_0001013050	0	0	0	0	0	0	0	0	0	0
1395	SPAL_0001017950	0	0.204577	0.040578	0	0.226956	0.112675	0.0634385	0.0996938	0	0
1396	SPAL_0001020850	0	0	0.121958	0.0266992	0.0331529	0	0	0	0	0.0666429
1397	SPAL_0001020900	0	0	0	0	0.0339559	0.0283775	0	0.0518162	0	0
1398	SPAL_0001021550	0	0	0	0	0	0	0.065691	0.0255386	0	0
1399	SPAL_0001022766	0	0	0	0	0	0	0	0.10232	0	0.0671956
1400	SPAL_0001023550	0	0.028374	0	0	0.0320241	0	0	0	0	0
1401	SPAL_0001028333	0	0.0582739	0	0	0.0654429	0	0.128256	0.100359	0.0407092	0
1402	SPAL_0001028366	0.0487822	0.0285238	0.0403849	0	0.0655438	0.0275917	0.128608	0.150428	0	0
1403	SPAL_0001030250	0.0495036	0	0	0.0546492	0.0332684	0.0279608	0	0.127119	0.0411939	0.0666177
1404	SPAL_0001036950	0	0	0	0.0271609	0	0	0	0	0	0
1405	SPAL_0001041750	0.0472892	0.0567778	0	0.0269145	0	0	0.062348	0	0	0
1406	SPAL_0001048950	0.0489316	0	0	0.0262916	0	0	0	0	0	0.0667959
1407	SPAL_0001049150	0	0.057304	0.0401506	0	0	0	0	0.0993953	0.0402126	0.0649444
1408	SPAL_0001051550	0	0	0	0	0	0	0	0	0	0
1409	SPAL_0001055750	0.0484571	0.0582056	0.0404575	0	0.0975843	0	0.0637632	0.249897	0.0404309	0.261489
1410	SPAL_0001056050	0	0	0	0	0	0	0	0	0	0
1411	SPAL_0001058350	0	0.0287596	0	0	0.0322031	0	0	0	0	0.0648503
1412	SPAL_0001059350	0.049138	0.0833638	0.0405618	0.158496	0.0333152	0.110078	0.0652496	0.0506666	0.20516	0
1413	SPAL_0001060025	0	4.2597e-08	0	0.208383	0	0.411897	0	0	2.17646e-06	0
1414	SPAL_0001061633	0	0.0551235	0	0	0	0.0276288	0	0	0	0
1415	SPAL_0001061666	0	0.0806499	0.0394328	0	0	0	0	0	0	0
1416	SPAL_0001062250	0.0486419	0.162445	0.119968	0.0800336	0.134679	0.16749	0	0.0771549	0.081983	0.0668366
1417	SPAL_0001062400	0	0	0	0	0	0	0.0629396	0	0.041906	0
1418	SPAL_0001062600	0	0	0	0	0	0	0	0	0	0
1419	SPAL_0001063100	0	0.0280078	0	0.0265677	0	0.0276296	0	0	0.0411652	0
1420	SPAL_0001063700	0	0.0590241	0.0408049	0	0.0323015	0	0.0632401	0.397641	0.0404237	0
1421	SPAL_0001065900	0	0	0	0	0.0397491	0	0	0.0225733	0.476316	0
1422	SPAL_0001066000	0	0.0539652	0	0.0808599	0	0	0	0.105351	0	0.0665246
1423	SPAL_0001066300	0	0.0269347	0	0	0	0	0	0	0.100925	0
1424	SPAL_0001066500	0	0	0	0	0	0	0.0652718	0.0257016	0	0
1425	SPAL_0001066600	0	0	0	0	0	0	0	0.0260163	0	0
1426	SPAL_0001066700	0	0	0	0	0	0	0.0276778	0.066385	0	0
1427	SPAL_0001072200	0	0.107776	0.0794358	0	0.0674987	0.0281504	0.194401	0.243004	0.0818812	0
1428	SPAL_0001072300	0	0	0	0	0	0	0	0.0520326	0	0
1429	SPAL_0001072700	0	0.0305265	0	0	0	0	0	0.160657	0	0
1430	SPAL_0001072800	0	0.0686633	0	0	0	0	0	0	0.0407188	0
1431	SPAL_0001072900	0	0.0270003	0	0	0	0	0.0649874	0.0256699	0.0408915	0
1432	SPAL_0001073200	0	0	0	0	0	0	0	0.0260164	0	0
1433	SPAL_0001073300	0	0.0538692	6.13056e-05	0	0	0.0844414	0.194326	0.0776167	0	0
1434	SPAL_0001073600	0	0.188117	0.0395553	0.081335	0.0676376	0.0283198	0	0.077967	0.163678	0.0661669
1435	SPAL_0001073700	0	0	0	0	0.033859	0.0282838	0	0.0259829	0.092979	0
1436	SPAL_0001074350	0	0	0	0.0278313	0	0	0.0647032	0.0506146	0	0
1437	SPAL_0001077100	0	0.0268432	0	0	0	0	0	0	0	0
1438	SPAL_0001077200	0	0.0269166	0.0793088	0.107999	0	0.0282157	0.129427	0	0.0409321	0
1439	SPAL_0001077300	0	0.0807144	0.158456	0.270864	0	0.113192	0	0.0259787	0.0818952	0
1440	SPAL_0001077400	0	0.053913	0.0794766	0.350134	0	0.0281549	0.0648321	0	0	0
1441	SPAL_0001077500	0	0	0.0396178	0	0	0	0	0	0.122309	0
1442	SPAL_0001077600	0	0	0	0	0	0	0	0	0.0408998	0
1443	SPAL_0001077700	0	0	0	0	0.0337328	0	0.0656153	0.146985	0	0
1444	SPAL_0001077800	0	0	0	0	0	0	0	0	0	0
1445	SPAL_0001077900	0	0	0	0	0	0	0	0	0	0
1446	SPAL_0001079600	0	0.0271698	0.240763	0.239301	0.033665	0.0556214	0	0	0.0820637	0.0670725
1447	SPAL_0001079700	0	0.0270177	0.119704	0	0	0.0278822	0	0	0.163672	0
1448	SPAL_0001080133	0	0	0.0409674	0	0	0	0	0.0503379	0	0.131707
1449	SPAL_0001080166	0	0.0292249	0	0.0556592	0.064844	0.0281684	0	0.199385	0.0403515	0
1450	SPAL_0001081233	0	0.0292448	0	0	0.064888	0	0	0.0498801	0	0
1451	SPAL_0001081266	0	0	0	0.0268293	0	0	0.131166	0.10191	0	0.0671626
1452	SPAL_0001081700	0.049134	0.219326	0.161414	0.0264553	0	0.027646	0	0.0509992	0.0821781	0
1453	SPAL_0001081900	0	0	0.0806336	0.160483	0	0.0839333	0	0	0.0412526	0
1454	SPAL_0001082400	0	0.0272828	0	0.0267979	0	0.0560762	0	0	0.123799	0
1455	SPAL_0001082500	0	0.136908	0	0.133932	0.0678386	0.112078	0	0.206675	0.165395	0
1456	SPAL_0001082600	0.195754	0.136049	0.0401704	0.0530478	0.0672593	0.0277406	0	0	0	0
1457	SPAL_0001082700	0	0	0	0	0	0	0	0	0	0
1458	SPAL_0001082900	0.0476361	0	0.0396918	0	0	0	0	0	0	0
1459	SPAL_0001083250	0	0.0269862	0.0398547	0	0.0335756	0	0.0649546	0.025656	0	0
1460	SPAL_0001083500	0.0484455	0	0	0	0	0	0	0	0.121264	0
1461	SPAL_0001084400	1.05977e-09	0	0.536639	0	0	0	0	0	0	0
1462	SPAL_0001085050	0.0469967	0.058224	0	0.0290047	0	0	0	0.138712	0	0.0658142
1463	SPAL_0001086900	0	0	0.0395732	0	0	0	0	0	0.414378	0
1464	SPAL_0001087000	0	0	0	0	0	0	0	0	0	0
1465	SPAL_0001087200	0	0	0	0.0543217	0	0	0	0	0	0
1466	SPAL_0001087300	0	0	0	0	0	0	0	0	0	0
1467	SPAL_0001087600	0	0	0	0	0	0	0	0	0	0
1468	SPAL_0001088375	0	0.0538408	0.0396486	0.0270512	0.0338103	0.0282655	0.0647111	0.0519148	0	0
1469	SPAL_0001088400	0	0.0268755	0	0	0	0.0282838	0.0645869	0	0	0
1470	SPAL_0001088500	0	0.0537327	0	0.216999	0.0338222	0	0.19365	0.051993	0.204576	0
1471	SPAL_0001088600	0.0966872	0.0864342	0	0	0	0.0830986	0	0.156904	0.080703	0
1472	SPAL_0001089025	0	0.0539637	0	0	0	0	0.0649372	0.591131	0	0
1473	SPAL_0001089300	0	0.109345	0.120547	0.0789136	0.0667824	0	0.130327	0	0.0408834	0
1474	SPAL_0001089350	0	0	0	0	0	0	0.0644803	0	0	0
1475	SPAL_0001089400	0	0.0270102	0.0399045	0	0	0	0	0.0511789	0	0
1476	SPAL_0001089500	0.0481445	0.0807577	0	0	0.101286	0.0845748	0	0.181317	0	0.13268
1477	SPAL_0001089700	0	0	0	0	0	0	0	0	0.0408998	0
1478	SPAL_0001091500	0	0.0537175	0	0	0	0	0	0.0260013	0	0
1479	SPAL_0001091600	0	0	0	0	0	0	0	0	0	0
1480	SPAL_0001091900	0.0481891	0.053817	0.0396793	0	0.0336728	0	0	0.0258043	0.0408681	0
1481	SPAL_0001092200	0	0	0	0	0.0337618	0	0	0	0.0409824	0
1482	SPAL_0001092400	0.145773	0.0811495	0.0798097	0.288729	0	0	0	0	0.0406887	0.0665273
1483	SPAL_0001092500	0	0	0	0	0	0	0	0	0	0
1484	SPAL_0001092600	0	0.038822	0	0	0.0719179	0.0895016	0	0.0779282	0.17052	0
1485	SPAL_0001093000	0	0.0452717	0	0.026898	0.0917024	0	0	0.0677776	0.0563855	0.133241
1486	SPAL_0001093100	0.0480833	0	0	0	0	0.0282324	0	0.0400109	0.148065	0.0662776
1487	SPAL_0001093200	0	0.107797	0.0794731	0.107551	0	0	0	0.0775396	0.0409305	0.0664531
1488	SPAL_0001093600	0	0.026901	0	0.0270915	0.0676465	0.0849078	0	0	0	0.132499
1489	SPAL_0001093700	0.0485908	0.0562533	0.0401858	0.0265437	0	0	0.0642352	0.0249581	0.0810795	0
1490	SPAL_0001093800	0	0	1.68108e-07	0	1.40948e-06	0	0	1.1387e-08	0	0
1491	SPAL_0001094000	0	0.280523	0.107904	0	0	0.368567	0	0	0	0
1492	SPAL_0001094100	0	0	0	0.0396016	0.0341291	0	0	0	0	0
1493	SPAL_0001094300	0.0809353	0.260109	0.040016	0.0451048	0.158079	0.0257884	0	0.00998129	0.241421	0.0469106
1494	SPAL_0001094400	0	0.135261	0	0.0806493	0.03379	0	0	0	0.246317	0
1495	SPAL_0001094500	0	0	0.0395507	0	0	0	0.266736	0.0875659	0	0
1496	SPAL_0001094600	0	0.0269776	0	0	0	0	0	0	0.0813927	0
1497	SPAL_0001094700	0	0	0	0	0.0339	0.0283058	0	0	0	0
1498	SPAL_0001094800	0	0	0	0	0.0336742	0	0	0	0.0821782	0
1499	SPAL_0001094900	0	0.0270877	0.0397151	0	0	0	0	0	0.0403045	0
1500	SPAL_0001095000	0.0973732	0.0270726	0.039961	0	0.00521176	0	0	0.0520763	0.0815798	0
1501	SPAL_0001095100	0	0	0	0	0	0	0	0	0	0
1502	SPAL_0001095400	0.0490069	0.155796	0.0402462	0.158836	0.0336085	0.0553935	0.196082	0.127949	0.12311	0
1503	SPAL_0001095600	0	0	0.119773	0.0532419	0	0	0.0650516	0	0.109119	0
1504	SPAL_0001095800	0	0	0	0	0	0	0	0	0	0
1505	SPAL_0001097200	0.0481465	0.0807361	0.0396611	0.107751	0.0337343	0	0	0.0258743	0.122717	0.0663321
1506	SPAL_0001097850	0	0.085747	0.0400529	0.0808787	0	0	0	0.0247884	0.160459	0
1507	SPAL_0001100100	0	0	0	0	0	0	0	0	0	0
1508	SPAL_0001100300	0.0976775	0.108707	0.080204	0	0.167521	0.0276245	0.0651347	0.203845	0.163617	0
1509	SPAL_0001100500	0	0	0.0199802	0.0155055	0	0.0158449	0	0	0	0
1510	SPAL_0001103500	0	0.0301148	0.0362913	0.0281816	0	0.123141	0.0528905	0.083697	0	0
1511	SPAL_0001103900	0	0.340124	0	0	0.10023	0.143975	0	0.0764657	0	0
1512	SPAL_0001104100	0.047944	0	0.0451448	0.0542256	0.033812	0	0.193625	0.0779607	0	0
1513	SPAL_0001104300	0	0	0	0	0	0	0	0	0	0
1514	SPAL_0001104400	0	0.0268432	0	0	0	0	0	0	0	0
1515	SPAL_0001104425	0	0	0	0	0	0	0	0	0	0
1516	SPAL_0001106000	0	0	0.0395827	0	0	0	0	0	0.122192	0.0661872
1517	SPAL_0001106150	0.0483808	0.0538578	0.039776	0.026528	0	0	0	0	0.122303	0.0664773
1518	SPAL_0001108100	0	0.165068	0.120474	0	0	0	0	0.0250811	0.0406234	0.0662403
1519	SPAL_0001108150	0	0.0272242	0	0.0267817	0	0	0	0	0	0
1520	SPAL_0001108600	0	0.0288064	0.201834	0.190196	0.0650092	0	0.127711	0.0249826	0	0
1521	SPAL_0001109800	0	0.0295045	0.0400534	0	0	0.0276313	0.0703343	0.350635	0	0.066864
1522	SPAL_0001110400	0	0	0	0	0	0	0	0	0.0408999	0
1523	SPAL_0001110500	0	0.0268777	0	0	0.0336945	0	0	0	0	0.0662454
1524	SPAL_0001110600	0	0.0268432	0	0	0	0	0	0	0	0
1525	SPAL_0001111100	0	0.0805782	0	0	0.0338081	0	0	0	0.0409016	0
1526	SPAL_0001111500	0.0480901	0.0807186	0.35668	0.189161	0.0337839	0.0282371	0	0	0.247921	0
1527	SPAL_0001111600	0.0963416	0	0	0	0	0	0	0.0442576	0	0.0669249
1528	SPAL_0001111700	0	0	0	0	0	0	0	0	0	0
1529	SPAL_0001111800	0	0.0268432	0	0	0	0	0	0	0	0
1530	SPAL_0001111900	0	0.0567964	0	0	0.066411	0.02761	0	0	0	0
1531	SPAL_0001112000	0.0652145	0.195375	0.119379	0.0269009	0	0.0281249	0	0.0258646	0.0819523	0
1532	SPAL_0001112200	0	0.0269276	0	0.0269643	0	0	0.129503	0.0258971	0	0.0663667
1533	SPAL_0001112300	0.0974717	0.162529	0.0800195	0	0.134157	0.027701	0	0.0766211	0.0408867	0.33427
1534	SPAL_0001112450	0	0.0807762	0	0	0.0335643	0	0.0647929	0	0	0
1535	SPAL_0001112600	0	0.0268933	0	0	0	0	0	0.0259679	0	0
1536	SPAL_0001113000	0	0.0268432	0	0	0	0	0	0	0	0
1537	SPAL_0001113100	0	0.0618917	0	0.036895	0	0	0.0647004	0	0	0
1538	SPAL_0001113300	0.205894	0.11849	0	0.0356369	0	0	0.20299	0.112548	0.0485367	0.0911383
1539	SPAL_0001113600	0	0	0.283563	0.0271192	0	0.0276997	0	0	0	0
1540	SPAL_0001113700	0	0	0	0	0	0	0	0	0	0
1541	SPAL_0001113800	0.0480751	0	0.0395947	0	0	0	0.193797	0.128974	0	0
1542	SPAL_0001113900	0	0.0426005	0	0	0	0	0	0.0259104	0	0
1543	SPAL_0001113975	0	0	0	0	0	0	0	0	0	0
1544	SPAL_0001114000	0	0	0	0	0	0	0	0.0260163	0	0
1545	SPAL_0001114100	0.0484225	0.0269567	0.112822	0.0644302	0.0335339	0	0	0	0	0.133089
1546	SPAL_0001116000	0	0.283492	0.0398789	0.100905	0.0581567	0.109557	0.0449804	0.0678199	0	0.0166048
1547	SPAL_0001116100	0	0	0	0	0	0	0	0	0	0
1548	SPAL_0001117700	0	0	0	0	0	0	0	0	0	0
1549	SPAL_0001117800	0	0	0.0399218	0.0269	0	0	0	0.0258825	0.0821294	0
1550	SPAL_0001118000	0	0.0768573	0.0396444	0.0134612	0	0	0.129374	0	0.122659	0
1551	SPAL_0001118800	0	0	0	0.0270925	0	0	0	0	0.0410033	0
1552	SPAL_0001120900	0	0.108207	0.0391878	0	0	0	0	0	0	0
1553	SPAL_0001121000	0	0	0	0	0.0337917	0	0.0647777	0.0518527	0	0
1554	SPAL_0001121100	0	0	0	0	0	0	0	0.0260163	0	0
1555	SPAL_0001121200	0.0485663	0	0	0	0.067381	0	0	0.0257545	0	0
1556	SPAL_0001121300	0	0.0269975	0	0.0270057	0	0	0	0	0	0
1557	SPAL_0001121400	0	0.05416	0.12002	0	0.0336618	0.0278964	0	0	0	0
1558	SPAL_0001121600	0.0494588	0	0.0408247	0.0531564	0	0.0277031	0	0.102053	0	0
1559	SPAL_0001121700	0	0	0	0	0.0338298	0	0	0	0	0
1560	SPAL_0001121800	0	0.0807578	0	0.0811625	0.101435	0.0565363	0.129415	0.233633	0	0.132627
1561	SPAL_0001121900	0	0.107114	0.0395567	0	0	0	0	0	0	0.0661162
1562	SPAL_0001122000	0	0	0	0	0	0	0.0644803	0	0	0
1563	SPAL_0001122100	0	0	0	0	0	0	0	0	0	0
1564	SPAL_0001122200	0	0.0539546	0	0	0.101386	0.0281918	0.424305	0.357106	0	0
1565	SPAL_0001122300	0	0.026934	0	0	0.0337454	0	0.0647727	0.129383	0	0
1566	SPAL_0001122400	0	0	0	0.0271608	0	0	0	0	0	0
1567	SPAL_0001122600	0	0	0.0396219	0.0270537	0.0338023	0	0.0646699	0.0613569	0.12281	0
1568	SPAL_0001122900	0	0.0274533	0.0807398	0.0264278	0	0	0	0.0254774	0.164317	0
1569	SPAL_0001125700	0	0.0268454	0.0790366	0	0	0	0	0	0.040869	0
1570	SPAL_0001125800	0	0	0	0	0	0	0	0.053581	0	0
1571	SPAL_0001126000	0	0	0	0	0	0	0	0	0	0
1572	SPAL_0001126100	0	0	0.0399006	0	0	0	0	0	0	0.0653892
1573	SPAL_0001126200	0.0479414	0.0268615	0.158133	0.271155	0.0676267	0	0	0.103955	0.245438	0
1574	SPAL_0001126300	0	0	0	0	0	0	0	0	0	0
1575	SPAL_0001126800	0.0482834	0.296558	0	0.0537714	0	0.0562166	0.0648492	0.0775437	0.12283	0.0664861
1576	SPAL_0001129300	0	0.0539764	0	0	0.0627249	0	0	0	0	0
1577	SPAL_0001129400	0.097887	0.0544253	0	0.0534408	0.033781	0.0279568	0	0.0773276	0.123476	0
1578	SPAL_0001133200	0	0.189906	0.158126	0	0.135262	0.0283262	0.129075	0.103965	0.122722	0
1579	SPAL_0001133400	0	0	0	0	0	0	0.0644802	0	0	0
1580	SPAL_0001133800	0	0.107457	0.0395382	0.0271141	0	0.0283213	0.129094	0.0259883	0.163635	0.066139
1581	SPAL_0001133900	0.0964024	0.0269343	0	0	0.0674878	0.0281507	0	0	0	0
1582	SPAL_0001134700	0	0.107785	0.119125	0	0.0337857	0.0564087	0	0.0518338	0.0409621	0
1583	SPAL_0001135000	0	0.134962	0	0	0.0337096	0.028043	0	0	0.122877	0.133195
1584	SPAL_0001135366	0	0	0	0	0.0333631	0	0.0654001	0.0512624	0	0.0670506
1585	SPAL_0001135700	0	0.0280423	0.040547	0	0.0331584	0.0275242	0	0.0252776	0.0409996	0.0666026
1586	SPAL_0001135900	0	0.0536864	0	0	0	0	0	0	0	0
1587	SPAL_0001137350	0	0.0580678	0.121316	0	0.0325103	0.0278429	0	0.0748962	0	0
1588	SPAL_0001139600	0.048962	0	0.0403775	0	0.199147	0.0548067	0	0	0	0.0667028
1589	SPAL_0001140400	0	0	0	0	0	0	0	0.0197324	0	0
1590	SPAL_0001140500	0	0.0538884	0.0397132	0.0539007	0	0.0281702	0.139912	0.315448	0	0.0664179
1591	SPAL_0001140900	0	0	0	0	0	0	0.119475	0.0257946	0.0409556	0
1592	SPAL_0001142166	0	0.107987	0	0.0270062	0.101491	0	0	0	0	0
1593	SPAL_0001142300	0.0480482	0.053769	0	0	0	0.0282206	0	0	0	0
1594	SPAL_0001142325	0	0.162273	0	0	0	0	0.259436	0.2254	0	0
1595	SPAL_0001142700	0	0	0	0.0543217	0	0	0	0	0	0
1596	SPAL_0001142775	0	0.0805295	0	0	0	0	0	0	0	0
1597	SPAL_0001142800	0	0.0805296	0	0	0	0	0	0	0	0
1598	SPAL_0001142900	0	0.0539302	0.0397282	0.0540777	0	0.0565144	0	0.0519192	0	0
1599	SPAL_0001143200	0	0.0274521	0	0.0608535	0	0.0554367	0.131188	0.0357941	0.164687	0.121633
1600	SPAL_0001143400	0	0.05777	0.0802116	0.4676	0	0.0278408	0	0.0246332	0.0371381	0
1601	SPAL_0001143600	0	0	0.016064	0	0.0292087	0	0	0	0	0
1602	SPAL_0001143800	0	0	0	0	0	0	0	0	0	0
1603	SPAL_0001144200	0	0.0449851	0.0199034	0.0268994	0	0	0	0.0808036	0.0390334	0
1604	SPAL_0001145300	0	0.107762	0.158866	0.0807292	0	0	0	0.0775809	0.122784	0.0664213
1605	SPAL_0001145400	0	0.312352	0.0404534	0.134041	0	0.0551037	0.0646181	0.0251527	0.0815086	0.0660243
1606	SPAL_0001145700	0	0	0	0	0	0	0.0816718	0.0993934	0	0
1607	SPAL_0001145800	0	0.0294993	0	0.0330245	0	0	0	0	0	0
1608	SPAL_0001146500	0	0	0	0	0	0.0283646	0	0	0	0
1609	SPAL_0001146600	0	0.189861	0	0	0.168819	0.308162	0.0652794	0.0516076	0	0
1610	SPAL_0001146700	0	0	0	0	0	0	0	0	0	0
1611	SPAL_0001147400	0	0.0271034	0	0	0	0	0	0	0.0406619	0
1612	SPAL_0001147500	0	0	0	0	0	0	0	0.0510255	0	0
1613	SPAL_0001147600	0	0.0806143	0.0620908	0	0.0675502	0	0.19375	0.285341	0	0
1614	SPAL_0001161300	0	0.0268599	0	0	0	0	0	0	0.490495	0
1615	SPAL_0001161400	0	0	0	0	0	0	0	0	0.5317	0
1616	SPAL_0001161900	0	0.0809863	0.0796196	0.0538384	0.168877	0.0281435	0	0.0258807	0.12299	0.0665747
1617	SPAL_0001162200	0.0479637	0	0	0.02708	0	0	0	0	0.0408967	0.132297
1618	SPAL_0001162300	0	0.0268784	0.044002	0.0270715	0	0	0.0718699	0.0259615	0.204557	0
1619	SPAL_0001162600	0	0	0	0	0	0	0	0	0	0
1620	SPAL_0001163000	0	0	0	0	0	0	0	0	0	0
1621	SPAL_0001163200	0	0.0372046	0	0	0.0983646	0.0945367	0	0.0781718	0.0592638	0
1622	SPAL_0001163900	0	0.13462	0.158672	0.0539921	0.0337784	0	0.129468	0.0518379	0	0
1623	SPAL_0001164000	0	0	0.067463	0	0.0081219	0.0217416	0.0776754	0.0803178	0.00139199	0
1624	SPAL_0001164400	0.0482142	0.0807297	0	0	0	0	0	0.025771	0	0
1625	SPAL_0001164900	0	0	0	0	0	0.0290677	0.0662352	0.102797	0	0
1626	SPAL_0001166300	0	0.0542731	0.0400582	0.116029	0	0.0562215	0	0.0776355	0	0
1627	SPAL_0001166500	0	0.0550995	0.0401047	0	0	0.0272081	0.0645289	0	0	0.0660746
1628	SPAL_0001166600	0	0	0	0	0	0	0	0.0257154	0.124138	0
1629	SPAL_0001166700	0	0.0548068	0.0805114	0.0322778	0	0	0.0653123	0.101613	0.0409707	0
1630	SPAL_0001168300	0	0	0.0394917	0	0	0	0	0	0	0
1631	SPAL_0001169800	0	0	0	0	0	0	0	0.0260163	0	0
1632	SPAL_0001169900	0	0	0	0	0	0	0	0	0	0
1633	SPAL_0001171600	0	0.0816191	0.0803991	0.0267445	0	0.0280011	0	0.0257976	0.123498	0
1634	SPAL_0001173500	0	0.0274032	0	0.0267725	0.101771	0.507887	0	0.0258284	0.0827086	0
1635	SPAL_0001174200	0	0.0597847	0.356315	0.301863	0	0.0565437	0	0	0.0818369	0.0662223
1636	SPAL_0001174300	0	0	0.0257889	0	0	0	0	0.0256308	0	0.0665383
1637	SPAL_0001174900	0	0.0270296	0	0	0	0.0280885	0	0	0.0820352	0
1638	SPAL_0001175000	0	0.0269853	0	0.0270251	0	0.0564913	0.408061	0.317178	0	0
1639	SPAL_0001175100	0	0.241828	0.0790916	0.0542457	0.101469	0.0283302	0.258239	0.0519919	0	0
1640	SPAL_0001175200	0	0	0	0	0	0	7.72433e-07	0	0	0
1641	SPAL_0001175300	0	0	0	0	0	0	0	0	0	0
1642	SPAL_0001175500	0	0	6.47744e-06	0.132868	0	0	0	0.0095348	0.0023966	0
1643	SPAL_0001175600	0	0.144741	0	0.000355233	0	0	0	0	0	0.0383203
1644	SPAL_0001175800	0	0.0313415	0	0	0.0337766	0	0.0645566	0	0.0408871	0
1645	SPAL_0001176300	0	0.162959	0	0	0.0843532	0.0359963	0	0.0258472	0.105228	0.206449
1646	SPAL_0001178100	0	0	0	0	0	0	0	0	0	0
1647	SPAL_0001178200	0	0.0807276	0	0.0540111	0	0	0.194078	0	0	0
1648	SPAL_0001178700	0	0.0542461	0.120209	0.0799057	0.0673432	0	0.130535	0.102772	0	0
1649	SPAL_0001178800	0	0.107722	0	0.0270727	0.0338302	0	0	0	0	0
1650	SPAL_0001179600	0.0969068	0.296849	0	0	0	0.0278904	0	0	0.44975	0
1651	SPAL_0001179700	0	0.0541701	0	0.107675	0	0	0	0	0	0
1652	SPAL_0001179800	0.0480995	0.0805014	0	0	0	0	0	0	0.0814509	0
1653	SPAL_0001179825	0	0	0	0.0269678	0	0	0	0	0	0.0665388
1654	SPAL_0001180200	0	0.105307	0	0	0	0	0	0.0144622	0.0530051	0
1655	SPAL_0001180500	0	0.0827286	0	0	0	0.0275378	0	0	0.0410178	0
1656	SPAL_0001180800	0.168154	0.0538032	0	0	0	0.056411	0.0646761	0.0837204	0	0
1657	SPAL_0001180900	0.0481875	0.192386	0	0.0134782	0	0.0281751	0.129537	0	0	0
1658	SPAL_0001181000	0	0.0813371	0.0400075	0	0.0669053	0	0	0.0254486	0	0.0667663
1659	SPAL_0001181800	0	0.135619	0	0.0534901	0.0337469	0	0.0652859	0.0257819	0.0410763	0
1660	SPAL_0001182850	0.0471549	0.0582613	0	0	0.0317035	0	0	0	0	0
1661	SPAL_0001184900	0	0	0	0	0	0	0	0	0.368099	0
1662	SPAL_0001185000	0	0.0546762	0	0.0268878	0	0.0562718	0	0	0	0
1663	SPAL_0001185100	0.0490431	0	0	0	0.101104	0.0277999	0	0	0	0
1664	SPAL_0001185125	0	0	0	0	0	0	0	0	0	0
1665	SPAL_0001185325	0	0.0545856	0	0.02672	0.0338243	0	0	0	0	0
1666	SPAL_0001185400	0	0	0.0398905	0.0597785	0	0	0.069692	0.340105	0	0.0666912
1667	SPAL_0001190675	0.0940426	0.0273337	0	0	0	0	0	0	0	0
1668	SPAL_0001190700	0	0.0279874	0	0	0.0194229	0.0554854	0	0	0	0
1669	SPAL_0001190800	0.0489558	0.0559122	0.161571	0.0264856	0.428998	0.0274183	0	0	0	0
1670	SPAL_0001192400	0	0.0270725	0	0	0.0338191	0.028141	0	0.0258928	0.0821714	0
1671	SPAL_0001192500	0	0.0268661	0	0	0	0	0.193738	0.0777256	0	0.0661819
1672	SPAL_0001192700	0.143957	0.0806117	0.0465622	0	0.141132	0.0884485	0.12915	0.227522	0.131242	0
1673	SPAL_0001193100	0	0	0	0	0	0	0	0	0.040908	0
1674	SPAL_0001193225	0	0	0	0.0880207	0	4.87589e-10	0	0	0	0
1675	SPAL_0001193600	0	0.0268432	0	0	0	0	0	0	0	0
1676	SPAL_0001193700	0	0.188389	0.039657	0.0269609	0.0337492	0	0.064713	0.103564	0.0409142	0.0663262
1677	SPAL_0001193800	0	0.112323	0	0.0266011	0	0.0552523	0.196132	0.304637	0	0.0670005
1678	SPAL_0001194100	0	0	0	0	0	0	0	0	0	0
1679	SPAL_0001194200	0	0	0	0	0	0	0	0	0	0
1680	SPAL_0001196200	0	0.0538764	0	0	0	0.0282696	0	0.0259637	0.286832	0
1681	SPAL_0001198433	0	0.056245	0.121676	0.0266375	0	0.0275339	0.0649523	0.100975	0.0818486	0
1682	SPAL_0001200800	0	0.0539005	0.0397132	0.107974	0.0675861	0.084637	0.129608	0.0518471	0.122908	0
1683	SPAL_0001202200	0	0.107593	0	0.108392	0.0338257	0.0390174	0.235377	0.272787	0.122831	0
1684	SPAL_0001202400	0	0.0268091	0.118626	0	0	0	0	0	0	0
1685	SPAL_0001202600	0	0	0	0	0	0	0	0	0	0
1686	SPAL_0001202668	0	0	0	0	0	0	0	0	0	0.0660649
1687	SPAL_0001202700	0	0	0.0397408	0.0270054	0.0338117	0	0	0	0	0
1688	SPAL_0001202800	0	0.0268432	0	0	0	0	0	0	0	0
1689	SPAL_0001202900	0	0	0	0	0	0	0.0651686	0.0256912	0.0819637	0
1690	SPAL_0001202933	0.0973053	0.0542351	0	0	0	0.0274628	0.0648922	0	0	0
1691	SPAL_0001202966	0	0.0538898	0	0	0	0	0	0	0.0407456	0
1692	SPAL_0001203000	0	0.0536864	0	0	0	0	0	0	0	0
1693	SPAL_0001205100	0	0	0	0	0	0	0	0	0	0
1694	SPAL_0001205200	0	0.00976484	0.00368417	0	0	0	0	0	0	0
1695	SPAL_0001205400	0.0482683	0.0809071	0	0.0269561	0	0.0281778	0.194579	0.242086	0	0
1696	SPAL_0001205900	0	0.0536864	0	0	0	0	0	0	0	0
1697	SPAL_0001207500	0.144852	0.0287587	0	0.0271326	0	0	0	0.0497878	0.0402704	0.130217
1698	SPAL_0001209000	0.048402	0.18834	0.0397378	0	0	0	0	0.0253854	0	0.0664166
1699	SPAL_0001209125	0	0	0	0	0	0	0	0	0	0
1700	SPAL_0001209200	0.0949337	0	0	0	0	0	0	0	0	0.0666373
1701	SPAL_0001209300	0	0	0.0233547	0	0	0	0	0	0	0.0659899
1702	SPAL_0001209400	0.0481574	0.0537741	0	0	0.033636	0	0	0	0.244981	0
1703	SPAL_0001209500	0	0	0	0	0.0338299	0	0	0	0	0
1704	SPAL_0001209600	0	0	0	0	0	0	0	0	0	0
1705	SPAL_0001209700	0.0596726	0.0424829	0	0	0	0	0	0	0	0
1706	SPAL_0001210200	0	0.0268026	0.0395513	0	0	0	0	0	0	0
1707	SPAL_0001210400	0	0	0.281423	0	0.0347025	1.49337e-09	0	0.00699165	0	0
1708	SPAL_0001210475	0	0	0	0	0	0	0	0	0	0.066065
1709	SPAL_0001210500	0	0.0536959	0	0	0	0	0	0	0.0408927	0
1710	SPAL_0001216400	0	0	0.0400735	0	0.0335925	0.0277451	0	0	0.0409518	0.133921
1711	SPAL_0001218250	0.148328	0	0.0407124	0.0265559	0.0335845	0.110905	0	0.15323	0.0825974	0
1712	SPAL_0001219000	0.0488172	0.0542755	0.0801645	0.0798105	0.0336566	0.0278288	0	0.179638	0	0.13402
1713	SPAL_0001219200	0	0	0	0	0	0	0	0	0	0
1714	SPAL_0001219450	0	0	0.0397211	0	0	0	0	0	0.0406639	0
1715	SPAL_0001219500	0	0	0	0	0	0	0	0	0	0
1716	SPAL_0001219600	0	0	0	0	0	0	0	0	0	0
1717	SPAL_0001221100	0.241097	0.080793	0.27795	0.0268803	0.0337101	0	0	0.0258368	0	0.0664046
1718	SPAL_0001221200	0.192724	0.0538275	0.158712	0.0268783	0.101094	0	0.0647321	0.0774937	0.0817716	0.132714
1719	SPAL_0001221300	0.0489127	0	0	0	0.0672239	0	0	0.0255775	0.0409914	0
1720	SPAL_0001221500	0	0	0	0	0	0	0	0	0.777098	0
1721	SPAL_0001221600	0	0	0	0	0	0	0	0	0.0817999	0
1722	SPAL_0001221800	0	0.0541926	0	0	0.0335282	0	0	0	0.522794	0
1723	SPAL_0001222000	0	0.111515	0	0.0535225	0.135548	0.13977	0	0.0706049	0	0
1724	SPAL_0001222200	0	0.0270637	0	0.0270328	0.27111	0.0847782	0	0.0259786	0	0
1725	SPAL_0001222300	0	0	0	0.0274238	0	0	0	0	0	0
1726	SPAL_0001222400	0	0.054061	0.0398748	0.188288	0.0675695	0	0	0.0258739	0	0
1727	SPAL_0001222500	0	0.0540875	0.0397285	0.135111	0.0337887	0.0283459	0	0.129816	0.0410673	0.0664444
1728	SPAL_0001222600	0	0.0268973	0.0792738	0.0269336	0	0	0.129357	0	0.0408867	0
1729	SPAL_0001222700	0.0490983	0.110624	0.0404837	0.0263591	0.0332924	0.0549631	0.065306	0.253207	0.0409821	0.133835
1730	SPAL_0001222800	0	0.0268766	0.118705	0.0270761	0	0	0.064589	0.0778928	0.0818217	0
1731	SPAL_0001222900	0	0.0269109	0	0	0	0	0	0	0.0407969	0
1732	SPAL_0001223000	0	0	0.0395562	0.0270766	0	0	0.129141	0	0.0409029	0
1733	SPAL_0001223100	0	0	0	0	0.0338486	0	0	0.0260021	0	0
1734	SPAL_0001223200	0	0	0.07948	0.0269912	0	0	0	0	0	0
1735	SPAL_0001223300	0	0	0	0	0	0.0283509	0	0.052058	0	0
1736	SPAL_0001223700	0	0	0	0	0	0	0	0	0	0
1737	SPAL_0001223800	0	0	0	0	0	0	0	0	0	0
1738	SPAL_0001224100	0	0	0	0	0	0	0	0	0.0409001	0
1739	SPAL_0001224200	0	0	0.0207695	0	0.112606	0	0	0	0.0201831	0.0983718
1740	SPAL_0001225500	0	0	0	0.0271609	0	0	0	0	0	0
1741	SPAL_0001225600	0	0	0	0	0	0	0	0	0.213193	0
1742	SPAL_0001225775	0	0	0	0.0268044	0	0	0	0	0	0.0669456
1743	SPAL_0001225800	0.048065	0	0	0.0541135	0.0338027	0	0	0.025957	0	0.0662657
1744	SPAL_0001225900	0	0	0	0	0	0	0.128961	0	0	0
1745	SPAL_0001226300	0	0	0	0.0270516	0	0.000981425	0.0648692	0.0519447	0.0410246	0
1746	SPAL_0001226400	0	0	0	0	0	0	0	0	0	0
1747	SPAL_0001226500	0	0	0	0	0	0	0	0	0	0
1748	SPAL_0001227200	0	0	0	0	0	0	0	0	0	0
1749	SPAL_0001228800	0	0.0268651	0	0	0	0.0282633	0.0645641	0	0	0.066162
1750	SPAL_0001228900	2.33166e-07	0.0933502	0.116254	0	4.47291e-09	0.0316528	0	0.599338	0	0
1751	SPAL_0001229800	0	0.0347906	0	0	0	0	0	0.0451806	0.514323	0
1752	SPAL_0001230800	0.0481819	0.0269157	0	0.134425	0	0	0.258943	0.103346	0.204453	0.0663603
1753	SPAL_0001231400	0	0.0268992	0.079229	0.0289285	0.0337923	0	0	0.0259466	0	0.0662608
1754	SPAL_0001231500	0	0	0	0.0542287	0	0	0	0.026061	0	0
1755	SPAL_0001232400	0	0.0807428	0.148708	0.134891	0.067522	0.0281946	0.129425	0	0.040922	0.198974
1756	SPAL_0001234050	0	0.115646	0	0	0.0327829	0	0.128825	0.15083	0.0406754	0
1757	SPAL_0001235300	0.121098	0.105269	0.167653	0.186112	0.0767686	0.122128	0.0942155	0.0396651	0.0456906	0
1758	SPAL_0001244950	0	0.0564846	0	0.198561	0	0.0326335	0.147116	0.148532	0.0475691	0
1759	SPAL_0001247300	0.170397	0.0989325	0.170294	0.141007	0	0	0	0.0258608	0.0784827	0.13262
1760	SPAL_0001247600	0	0.0509422	0	0	0	0.0350947	0	0	0	0
1761	SPAL_0001249800	0	0.0723133	0	0.0136442	0	0.0138715	0	0.0124538	0	0.0652979
1762	SPAL_0001249900	0	0	0.0398164	0.0269636	0	0	0	0.025915	0.041024	0
1763	SPAL_0001250000	0	0.0538066	0.0396367	0	0.0337543	0.0563879	0.129367	0.310814	0.0409091	0.066294
1764	SPAL_0001250100	0.0481492	0.0807404	0.0396633	0	0	0.0281569	0	0.0258757	0.0818154	0
1765	SPAL_0001250200	0.0479716	0.1612	0.237304	0.108316	0	0.0565755	0	0	0.2863	0.0661579
1766	SPAL_0001250300	0	0	0	0.0267592	0	0	0.0655124	0.0516233	0.0411884	0
1767	SPAL_0001250400	0	0	0	0	0	0	0	0.0260163	0	0
1768	SPAL_0001250500	0	0.0538035	0.0396457	0	0	0	0	0.0258651	0.0408902	0
1769	SPAL_0001250700	0	0.0268432	0	0	0	0	0	0	0	0
1770	SPAL_0001251750	0	0	0	0	0	0	0	0	0	0
1771	SPAL_0001252500	0	0	0	0	0	0	0	0	0	0
1772	SPAL_0001252900	0.0483586	0.11487	0.0417678	0.165378	0	0.0840316	0.0686803	0.133215	0	0.0665459
1773	SPAL_0001253000	0.04797	0.107483	0.0395526	0.081302	0.06762	0.028309	0.129135	0.103922	0.163649	0
1774	SPAL_0001253300	0	0	0	0	0	0	0	0	0	0
1775	SPAL_0001253500	0	0	0.106766	0.0164298	0	0	0.0737605	0.0326171	0	0
1776	SPAL_0001253800	0	0	0	0	0	0	0	0.339072	0	0
1777	SPAL_0001253900	0.0487644	0	0.0400188	0	0.0332558	0	0.129856	0.47982	0	0.0666533
1778	SPAL_0001254500	0.0485122	0.372885	0	0	0.0948509	0	0	0	0	0
1779	SPAL_0001254600	0.0968199	0.0538266	0	0	0.0333721	0	0	0	0	0
1780	SPAL_0001254650	0	0.0544372	0	0.0267891	0.0338283	0	0	0	0	0
1781	SPAL_0001254700	0	0.415444	0	0.0806962	0.0380747	0.02814	0	0.0518198	0.164848	0
1782	SPAL_0001254716	0	0.10827	0.0399397	0.0806946	0.033809	0.112519	0	0.0258836	0.0410759	0
1783	SPAL_0001257100	9.19015e-07	0	0	0	0.00454855	0	0	0	0	0
1784	SPAL_0001259375	0	0.0539476	0.0393008	0	0	0	0	0	0	0
1785	SPAL_0001261350	0.0971435	0	0.0810864	0.0275265	0	0	0.127989	0.225271	0.0406129	0
1786	SPAL_0001264125	0.097942	0.36245	0.080778	0.0264098	0.0330299	0	0	0.151076	0.163312	0.0664239
1787	SPAL_0001264200	0	1.16795e-07	0.138966	0.058963	0	0	0.242729	0.176213	0.0409226	0
1788	SPAL_0001267400	0	0	0	0	0	0	0	0	0.367044	0.066255
1789	SPAL_0001267600	0	0	0	0	0	0	0	0	0.1227	0
1790	SPAL_0001267700	0	0	0	0	0	0	0	0	0.0408998	0
1791	SPAL_0001271900	0	0.0536742	0.0395662	0	0	0	0	0	0.489211	0.132339
1792	SPAL_0001272400	0	0.138787	0	0.0265905	0.0336439	0.0555473	0.329116	0.153504	0.124113	0
1793	SPAL_0001276100	0	0.0856943	0.0898804	0.0528624	0.12712	0	0	0	0.0307833	0.0505839
1794	SPAL_0001276366	0	0.0838906	0.0814859	0.0796613	0	0.0276437	0	0.228902	0	0
1795	SPAL_0001276400	0	0.0858018	0	0.048049	0	0.0276896	0	0.0755319	0	0.0659718
1796	SPAL_0001276500	0.0631427	0.0387219	0.0211932	0	0	0.0548277	0	0.0389348	0.0408339	0.0348811
1797	SPAL_0001279200	0	0.13471	0.0396963	0.0270061	0.101388	0.141119	0.0647795	0.103722	0.163857	0
1798	SPAL_0001283700	0	0	0	0	0	0	0	0	0	0
1799	SPAL_0001283800	0	0.0537876	0	0	0.03776	0	0.105326	0	0	0
1800	SPAL_0001284000	0.144418	0.296215	0	0.0270279	0.0676022	0.0564873	0	0.155657	0	0.132697
1801	SPAL_0001284200	0	0.107491	0.0395561	0.0271002	0.033811	0	0.0645733	0.0259806	0	0
1802	SPAL_0001284300	0	0	0	0	0	0	0	0.0260163	0	0
1803	SPAL_0001284400	0	0.0810409	0.0797557	0.133732	0	0	0.065006	0.103029	0.204779	0
1804	SPAL_0001285400	0	0.00324398	0	0	0	0	0	0	0	0
1805	SPAL_0001285700	0	0	0	0.0271185	0	0	0	0.026057	0	0
1806	SPAL_0001285800	0	0.134465	0.039602	0.0541015	0.0337929	0	0	0	0.0409216	0
1807	SPAL_0001285900	0	0.0272757	0	0	0	0	0	0.0768151	0	0
1808	SPAL_0001286300	0.0492022	0	0	0.0529423	0.0333388	0	0	0	0	0.133913
1809	SPAL_0001286500	0	0.0271224	0	0.0535932	0.033777	0	0	0	0.0410959	0
1810	SPAL_0001286700	0	0.0270897	0	0	0	0	0	0.0257146	0.0410047	0
1811	SPAL_0001287000	0	0	0	0	0	0	0	0	0.0408999	0
1812	SPAL_0001287300	0	0	0.0394916	0	0	0	0	0	0	0
1813	SPAL_0001287500	0	0	0	0	0	0	0	0	0	0
1814	SPAL_0001287600	0	0	0.0394916	0	0	0	0	0	0	0
1815	SPAL_0001287700	0	0	0	0	0	0	0.124701	0.179693	0	0.0691206
1816	SPAL_0001287725	0.0480402	0.0554805	0	0.0786081	0	0	0	0	0	0
1817	SPAL_0001288000	0	0.0268278	0.0395142	0	0	0	0	0	0	0
1818	SPAL_0001290600	0.0482995	0.0808093	0	0	0.0336313	0	0.0648087	0.231673	0.122608	0
1819	SPAL_0001292200	0	0.0268419	0.039522	0	0	0	0.0645109	0	0.0408508	0
1820	SPAL_0001292400	0	0.0275827	0	0	0	0.0276571	0	0.0764792	0	0.134642
1821	SPAL_0001292500	0	0.0807152	0.0396561	0	0.0337114	0	0.0647019	0.258514	0	0
1822	SPAL_0001292600	0	0	0	0	0	0	0	0	0	0
1823	SPAL_0001292700	0	0	0	0.0269493	0	0	0.12218	0.0352079	0	0
1824	SPAL_0001292800	0	0	0	0	0	0	0	0	0.889846	0
1825	SPAL_0001292900	0.0207175	0	0.0113477	0	0.0287888	0	0.0462127	0.0657587	0	0
1826	SPAL_0001294600	0	0.0268432	0	0	0	0	0	0	0	0
1827	SPAL_0001294800	0	0	0	0	0	0	0	0	0	0
1828	SPAL_0001294900	0	0	0	0	0	0.0284025	0	0.0779447	0	0
1829	SPAL_0001295700	0	0.055405	0.242623	0	0	0.027435	0.130098	0.0505109	0.245434	0
1830	SPAL_0001297900	0	0	0	0.0543217	0	0	0	0	0	0
1831	SPAL_0001298200	0	0	0	0	0	0	0	0	0	0
1832	SPAL_0001298300	0	0	0	0	0	0	0	0	0	0
1833	SPAL_0001298800	0	0	0.042264	0	0	0	0	0	0	0
1834	SPAL_0001298900	0	0.0269539	0.0397537	0.432454	0	0.028278	0	0	0	0
1835	SPAL_0001299100	0.0485576	0.0829367	0	0.0261869	0	0	0.192787	0	0	0.0658633
1836	SPAL_0001299300	0	0.032638	0.079096	0	0	0	0	0	0.490016	0
1837	SPAL_0001299400	0	0	0	0	0	0	0	0	0	0
1838	SPAL_0001299700	0.0731173	0.0408356	0	0	0.0166308	0	0.318078	0.145233	0	0.196308
1839	SPAL_0001300200	0	0	0.0400985	0	0	0.0964262	0	0	0	0
1840	SPAL_0001300300	0	0.0538195	0	0.0541107	0.0338063	0	0	0.077873	0.0818857	0.0662861
1841	SPAL_0001300400	0	0	0	0	0	0	0	0	0.1227	0
1842	SPAL_0001300900	0.048016	0.107482	0.0395739	0	0	0.028219	0.129179	0.103655	0.122641	0.198577
1843	SPAL_0001303200	0	3.6051e-07	0	0	9.8617e-07	0	0	0	0.00133202	0
1844	SPAL_0001303900	0	0	0	0	0	0	0	0	0	0
1845	SPAL_0001304100	0	0.107472	0.03955	0	0.0338018	0	0	0.0259724	0.0818106	0
1846	SPAL_0001304200	0	0.0282883	0.0382805	0.0270261	0	0	0	0	0.442968	0
1847	SPAL_0001304400	0	0	0	0.0538749	0.0338643	0.0281717	0.130478	0.103695	0.123441	0
1848	SPAL_0001304700	0	0	0.0399438	0	0	0	0.0650264	0.0255082	0	0
1849	SPAL_0001304725	0	0.0274314	0	0.0264538	0	0	0	0	0.0410999	0
1850	SPAL_0001305816	0	0	0	0.0271609	0	0	0	0	0	0
1851	SPAL_0001305832	0	0	0	0.0268549	0	0	0.0650306	0	0.041017	0
1852	SPAL_0001312000	0	0	0	0	0	0	0	0	0	0
1853	SPAL_0001312400	0	0.0538725	0.0795263	0	0.100745	0	0.259278	0.0513706	0.0816779	0.0664771
1854	SPAL_0001312500	0.0479882	0.161242	0.118688	0.108313	0.135191	0.0848627	0.0645808	0.0519303	0.122724	0.0661775
1855	SPAL_0001312600	0.0479168	0.216443	0.0790283	0	0.190349	0	0	0.102953	0	0.0660994
1856	SPAL_0001312700	0	0	0	0	0	0	0	0	0	0
1857	SPAL_0001312800	0	0	0	0	0	0	0	0	0	0
1858	SPAL_0001312900	0	0	0	0	0	0	0	0	0	0
1859	SPAL_0001313000	0	0	0	0	0	0	0	0	0	0
1860	SPAL_0001313100	0	0	0	0	0	0	0	0	0	0
1861	SPAL_0001313400	0	0.0807446	0	0	0.0337398	0	0	0	0	0
1862	SPAL_0001313800	0	0	0	0	0	0	0	0	0	0
1863	SPAL_0001313900	0	0.0283334	0	0.053662	0.0332797	0.0277321	0.065387	0.101673	0.0412299	0
1864	SPAL_0001318600	0	0	0.0397886	0.053311	0	0	0.0648573	0	0.0408491	0.0665791
1865	SPAL_0001319000	0	0.0272931	0.241719	0.372152	0	0.111208	0	0	0.041122	0
1866	SPAL_0001319500	0	0.0268854	0.118736	0.0812888	0	0.0283059	0	0	0.163712	0
1867	SPAL_0001319700	0	0.0762999	0	0.0107596	0.0330987	0.05502	0	0.283333	0	0
1868	SPAL_0001320000	0.0483442	0.134629	0	0	0.0335323	0	0.0648019	0.358852	0	0.0664685
1869	SPAL_0001320700	0	0.107426	0	0	0	0	0	0	0.0404089	0.0611154
1870	SPAL_0001320800	0	0.322706	0	0.10842	0.0338262	0.113259	0.0646233	0.065166	0.0818779	0
1871	SPAL_0001320900	0	0.0560347	0.0405015	0.0530672	0.0331359	0.0275055	0	0	0	0.133206
1872	SPAL_0001321100	0.0613027	0.145795	0	0.0359058	0.033762	0.0473517	0.0649969	0.284946	0.20131	0
1873	SPAL_0001321400	0	0.0270316	0	0.0268368	0	0	0	0.0516599	0.0410127	0.0666973
1874	SPAL_0001321425	0	0.605118	0	0	0	0	0	0.0515412	0.0409905	0
1875	SPAL_0001321500	0	0.0547876	0	0.026483	0	0	0	0	0.0411102	0
1876	SPAL_0001321525	0	0.0811082	0	0.0539236	0	0	0	0.0777632	0.0821186	0
1877	SPAL_0001321775	0	0	0	0	0	0	0	0	0.0408999	0
1878	SPAL_0001321800	0	0.0269519	0	0	0.0336842	0	0	0	0.450024	0
1879	SPAL_0001322200	0	0	0	0	0	0	0	0	0	0
1880	SPAL_0001322600	0	0.0554859	0.20319	0.185496	0.0669463	0.0553005	0	0	0	0
1881	SPAL_0001322700	0	0.0269595	0	0.0811198	0	0	0	0.025959	0.0819926	0
1882	SPAL_0001322800	0	0.0806977	0	0	0	0.0282845	0.129299	0.0519352	0	0
1883	SPAL_0001323200	0	0.0536893	0.0395097	0	0	0	0	0	0.081758	0
1884	SPAL_0001325300	0	0	0.121536	0.0266073	0.0337871	0	0	0.0513595	0.123895	0
1885	SPAL_0001325400	0	0	0	0.0543217	0	0	0	0	0	0
1886	SPAL_0001325500	0.0490676	0	0.162117	0	0.0329965	0	0	0.58879	0.0947967	0.0664197
1887	SPAL_0001325800	0.0974626	0.0270875	0	0.0528768	0	0	0.0650711	0.0765292	0	0.0668144
1888	SPAL_0001330500	0	0	0	0	0	0	0	0	0	0
1889	SPAL_0001330600	0	0	0	0	0	0	0	0	0.0854136	0
1890	SPAL_0001330700	0	0.0536863	0	0	0	0	0	0	0	0
1891	SPAL_0001330800	0	0	0	0	0.0337273	0	0	0	0.0408882	0.0662849
1892	SPAL_0001331100	0	0	0	0	0	0.0276086	0	0.0521387	0	0
1893	SPAL_0001331500	0.0484111	0.0653998	0	0	0.101896	0.0818375	0.324751	0.0440554	0.0409518	0
1894	SPAL_0001331600	0	0.0536863	0	0	0	0	0	0	0	0
1895	SPAL_0001331625	0	0.0546948	0.242015	0.265178	0.0336733	0	0	0.0256004	0.0822473	0
1896	SPAL_0001331700	0	0	0	0	0	0	0	0	0	0
1897	SPAL_0001331900	0	0.108136	0.0798492	0.106621	0.033634	0	0.195213	0.025696	0	0.0667412
1898	SPAL_0001332500	0.0964341	0.19811	0.0846981	0.107642	0.13493	0.0281311	0.064785	0.03317	0.0409251	0.132821
1899	SPAL_0001332600	0	0.0974698	0	0	0.0337057	0	0	0.0731178	0.0960304	0
1900	SPAL_0001333600	0.0961831	0.242219	0	0.0811569	0.10142	0.14133	0	0	0.286622	0
1901	SPAL_0001336000	0	0.0677276	0.141893	0.112525	0	0.0306044	0.0734325	0.0837848	0.0411108	0
1902	SPAL_0001336800	0	0.11029	0	0.0266065	0.0675396	0	0	0.205163	0.247944	0
1903	SPAL_0001337000	0	0	0	0	0	0	0	0.0260163	0	0
1904	SPAL_0001337500	0.0478772	0	0	0	0	0	0	0	0	0
1905	SPAL_0001337800	0	0.0268875	0.0396638	0	0	0	0.129357	0.0257369	0.0408139	0.331613
1906	SPAL_0001337900	0	0.000434971	0	0	0	0	0.0384285	0	0	0
1907	SPAL_0001338600	0	0.255233	0.121022	0.18797	0.0327759	0.357212	0	0	0	0
1908	SPAL_0001338800	0.0950192	0.0293497	0.0406496	0	0.0638839	0.0295301	0	0.0238511	0	0
1909	SPAL_0001338900	0	0	0	0	0	0	0	0	0	0
1910	SPAL_0001338975	0	0	0	0	0	0	0	0.0151898	0.0362958	0
1911	SPAL_0001339000	0	0	0	0	0.0674975	0	0	0	0.0817816	0.0662391
1912	SPAL_0001339100	0.0479768	0.0268692	0	0	0	0.028289	0	0.0259653	0.286324	0.198493
1913	SPAL_0001339400	0	0.0660368	0.0397873	0.207943	0	0.0842874	0.16912	0.0516813	0.122871	0.133066
1914	SPAL_0001339500	0	0	0	0	0	0	0	0	0.0651912	0
1915	SPAL_0001339600	0.28864	0.314075	0	0.0538335	0	0	0	0	0.0415651	0.140569
1916	SPAL_0001339700	0	0.0302175	0	0	0.0325777	0	0	0	0.0403386	0
1917	SPAL_0001339800	0	0.304733	0	0.0271075	0.101456	0	0.0645839	0.0519736	0.0409225	0
1918	SPAL_0001339900	0	0	0	0	0	0	0	0	0	0
1919	SPAL_0001340000	0	0.0804617	0	0	0	0	0.0645347	0	0	0
1920	SPAL_0001340100	0	0.107699	0	0.108305	0.0338289	0	0	0.0259764	0.163871	0
1921	SPAL_0001340200	0.0483095	0.107582	0	0	0.0334629	0	0	0	0	0
1922	SPAL_0001340300	0	0.0268979	0.0396053	0.0270726	0.0676192	0	0	0.0519342	0.0409349	0
1923	SPAL_0001340500	0	0	0	0	0	0	0	0	0	0
1924	SPAL_0001340600	0	0.026879	0.03969	0	0.0334705	0	0	0	0	0.0663544
1925	SPAL_0001340700	0	0.0732068	0.0395449	0	0.067477	0	0.0645444	0	0	0
1926	SPAL_0001340800	0	0	0	0	0	0	0	0	0	0
1927	SPAL_0001340900	0	0.0268893	0.079272	0	0.0336832	0	0	0	0.0408585	0
1928	SPAL_0001341100	0.0242442	0.0404646	0.0597865	0	0.167636	0	0	0.0384053	0.142907	0
1929	SPAL_0001342500	0.0486617	0.0811828	0.159788	0.0263653	0	0	0.129922	0.279855	0	0.133398
1930	SPAL_0001342600	0.0485741	0.108046	0.0798125	0	0.0335334	0.0277557	0.0649932	0.153544	0.204268	0.0667059
1931	SPAL_0001342700	0	0.0272717	0.0402193	0.0264151	0	0	0.0652754	0.12749	0.0409899	0
1932	SPAL_0001342900	0	0.0539757	0.0795853	0.0269299	0.0337767	0	0	0.0258863	0.122972	0
1933	SPAL_0001344300	0.0964388	0.107767	0.0397141	0.0269289	0	0.0281493	0	0.0517503	0	0.0664184
1934	SPAL_0001346150	0	0.0536863	0	0	0	0	0	0	0	0
1935	SPAL_0001346200	0.31719	0.0959239	0.136159	0.13025	0	0	0	0	0	0.150726
1936	SPAL_0001346300	0	0	0	0	0	0	0	0	0	0
1937	SPAL_0001346400	0	0.135616	0	0	0.101433	0.0280883	0	0	0	0
1938	SPAL_0001346450	0	0	0	0	0	0	0	0	0.0408999	0
1939	SPAL_0001346500	0	0.134216	0	0	0	0	0	0	0	0
1940	SPAL_0001346700	0	0	0	0.0543217	0	0	0	0	0	0
1941	SPAL_0001347400	0	0.00688851	0	0	0	0	0	0	0	0
1942	SPAL_0001348100	0.0475618	0.0270214	0	0	0	0	0	0	0	0
1943	SPAL_0001348300	0	0.0272918	0	0	0	0.027539	0	0	0.0818499	0.0669033
1944	SPAL_0001348500	0	0.117203	0.16205	0.140215	0.12828	0.170729	0	0.0740233	0.0401341	0.0649662
1945	SPAL_0001348600	0	0.214883	0.118596	0.0271125	0.0676214	0	0.0645373	0.0519724	0	0.0661289
1946	SPAL_0001348700	0	0	0	0	0	0	0	0	0	0
1947	SPAL_0001348800	0	0	0	0	0	0	0	0	0	0
1948	SPAL_0001348900	0.0483127	0.0538968	0	0	0	0.0280003	0	0	0	0
1949	SPAL_0001351575	0	0	0	0	0	0	0.262711	0.0255436	0	0
1950	SPAL_0001351600	0	0	0.0395029	0	0	0	0	0	0	0.0660462
1951	SPAL_0001352175	0.0488004	0.115646	0.0804968	0.0263179	0	0	0	0.366539	0.0406858	0.132385
1952	SPAL_0001352400	0	0	0	0	0	0	0	0	0	0.066065
1953	SPAL_0001352450	0	0.0274443	0	0	0	0.027746	0	0	0	0
1954	SPAL_0001352500	0	0.0268432	0	0	0	0	0	0	0	0
1955	SPAL_0001352600	0	0.0808021	0	0	0.0337454	0	0.129545	0.0517531	0	0
1956	SPAL_0001353000	0.343625	0.139548	0	0	0	0.0549151	0	0.0352345	0	0
1957	SPAL_0001353200	0	0.0539839	0	0.026934	0.0337818	0	0.0649221	0.0258902	0.0409968	0
1958	SPAL_0001353225	0	0.027594	0	0.0264258	0	0	0	0	0	0
1959	SPAL_0001353300	0.0494685	0	0	0.0265763	0	0.0277335	0.131648	0.485197	0.165313	0
1960	SPAL_0001353475	0	0	0	0	0	0	0	0	0.1227	0
1961	SPAL_0001353500	0	0.138356	0	0	0.0337499	0	0	0	0.0409062	0
1962	SPAL_0001354200	0	0	0	0	0	0	0	0	0	0
1963	SPAL_0001354500	0.0972855	0.109174	0.0400345	0.026118	0	0	0	0	0.121915	0
1964	SPAL_0001354600	0	0	0.0394917	0	0	0	0	0	0	0
1965	SPAL_0001354800	0	0.0809245	0	0	0.135179	0.028193	0	0	0.0819819	0
1966	SPAL_0001354900	0	0.0665152	0.0395535	0.0541268	0	0	0.0850104	0	0.0408942	0
1967	SPAL_0001355200	0	0.0269027	0	0	0	0	0.194072	0.0258766	0.0408968	0
1968	SPAL_0001356300	0	0.0942132	0.0398483	0	0	0	0	0.132061	0	0
1969	SPAL_0001356400	0	0.0807552	0.118975	0.0269965	0.168875	0	0.194157	0.23326	0.0818662	0
1970	SPAL_0001356700	0.108906	0	0	0.0328692	0	0	0	0.236268	0	0.0798413
1971	SPAL_0001356800	0	0	0	0	0	0	0	0	0	0
1972	SPAL_0001356900	0	0.0536696	0	0	0	0	0.0645004	0	0	0
1973	SPAL_0001357100	0	0	0	0	0	0	0	0	0	0
1974	SPAL_0001363300	0	0.0811818	0	0	0	0.028137	0	0	0	0
1975	SPAL_0001363400	0	0.0893729	0.0396739	0.0606211	0.0780804	0.0325479	0.0707688	0.0898685	0	0.0663562
1976	SPAL_0001363900	0	0.0269984	0	0	0	0	0	0	0.406649	0
1977	SPAL_0001364000	0	0.0687295	0	0.0294592	0	0	0.194606	0.0988651	0	0
1978	SPAL_0001364100	0	0	0	0.0810114	0	0	0	0.0259775	0.0411997	0
1979	SPAL_0001364300	0	0	0	0	0	0	0	0	0	0
1980	SPAL_0001364400	0.26419	0.0671705	0.000388814	0	0.0337207	0	0	0.0258794	0	0.0662014
1981	SPAL_0001365000	0	0	0	0.108644	0	0	0	0	0	0
1982	SPAL_0001365200	0	0.109312	0	0.194442	0.0593102	0	0	0	0	0.103819
1983	SPAL_0001366900	0	0.18832	0	0	0	0	0	0.259412	0.0869954	0
1984	SPAL_0001367600	0	0.151852	0.158415	0.0307229	0.229682	0.14143	0	0.0259683	0.122804	0.132489
1985	SPAL_0001367700	0	0.0270242	0.199309	0.0807212	0.0337862	0	0	0.0517572	0	0
1986	SPAL_0001367800	0	0.0808836	0	0	0	0.056481	0	0	0	0
1987	SPAL_0001368100	0	0.0269219	0.0397045	0.0268336	0	0	0.0647599	0	0.040881	0
1988	SPAL_0001368200	0	0	0	0	0.0339546	0	0	0.0259208	0	0
1989	SPAL_0001368600	0	0	0	0	0	0	0	0	0	0
1990	SPAL_0001368700	0	0	0	0	0.0677973	0	0	0.051927	0	0
1991	SPAL_0001368800	0.0479665	0.175384	0.118619	0	0	0	0.215675	0.0495673	0.0620715	0
1992	SPAL_0001369100	0	0.107951	0.119372	0.00128238	0.0624262	0.0281609	0.259642	0.155348	0.081986	0
1993	SPAL_0001369300	0	0	0.0396543	0.026997	0.0337739	0	0.0647132	0	0	0
1994	SPAL_0001369400	0	0	0	0.0271232	0	0	0	0.0260526	0	0
1995	SPAL_0001369500	0	0.0271388	0	0	0	0	0	0.102934	0	0
1996	SPAL_0001369600	0	0.08451	0.040627	0	0.0331321	0.0275805	0	0.0505728	0.0409935	0
1997	SPAL_0001369700	0	0.0831908	0.0810935	0.184827	0	0.0550364	0.0653373	0.152132	0	0.0669824
[truncated: 587 more rows]

## Sheet: SvRNAseq_discardedGene_counts
File S3. Counts for genes discarded during preprocessing filtering
Low-count genes and associated log2CPM values discarded during preprocessing.
	geneID	FLF-DRR106346	FLF-DRR106347	FLF-DRR106348	FLF-DRR106349	FLF-DRR106350	FLF-DRR106351	PF-DRR106352	PF-DRR106353	PF-DRR106354	PF-DRR106355	PF-DRR106356	PF-DRR106357
1	SVE_0000052350	0.0630208	0.0629395	0.197666	0.323575	0.0910953	0.0886055	0.118817	0	0	0	0	0
2	SVE_0000062250	0	0	0	0	0	0	0	0	0	0	0	0
3	SVE_0000063250	0.133084	0	0	0	0	0	0.0657814	0.0639199	0	0.0762009	0	0.0702435
4	SVE_0000065950	0	0	0.244402	0.119786	0.0915823	0.0893005	0.251597	0.0618926	0.078003	0	0.149824	0.0744137
5	SVE_0000115450	0	0.0644882	0.203647	0.0669672	0.0948719	0.0908414	0.0612651	0.0602749	0	0	0.125471	0
6	SVE_0000120250	0.261687	0.256493	0	0.119569	0	0	0.189948	0.374203	0.0786136	0.307878	0.226195	0.149527
7	SVE_0000131050	0	0.126949	0.0679337	0	0.0951204	0	0	0.0608131	0.0719294	0	0	0
8	SVE_0000176450	0.0645794	0.0643089	0	0	0	0	0	0	0	0	0	0
9	SVE_0000182450	0.20032	0.197695	0.347786	0.341313	0	0.0909977	0.120607	0.0598064	0	0.201909	0	0
10	SVE_0000212950	0.196243	0.25583	0	0	0.0923553	0.179748	0.250935	0.122905	0.0767854	0	0	0
11	SVE_0000332450	0.14642	0	0	0	0	0	0	0	0	0.0741549	0	0.0657658
12	SVE_0000382550	0.0621323	0.062425	0.0650234	0.0635221	0	0.087871	0	0	0	0	0	0
13	SVE_0000399650	0.0732	0	0	0	0	0	0	0	0	0	0	0.0635629
14	SVE_0000400	0.12985	0.31768	0	0	0.672003	1.32682	0	0.0636205	0	0.0767606	0	0.0719504
15	SVE_0000434133	0	0	0.190871	0	0	0	0	0	0	0	0	0
16	SVE_0000434166	0	0	0	0	0	0	0	0.0641989	0	0	0	0
17	SVE_0000491450	0.343988	0.559262	0.80679	0.143488	0	0.582919	0.0619959	0.124107	0.0685661	0.0682012	0	0.120872
18	SVE_0000500	0	0.12708	0	0	0.264015	0.773528	0.323289	0.317374	0.235669	0	0	0.0723126
19	SVE_0000502650	0.193017	0.0656533	0	0	0.287433	0.277617	0	0	0.0718369	0.0700531	0	0
20	SVE_0000503850	0.0641415	0	0	0	0	0.180436	0	0.0618853	0	0	0	0
21	SVE_0000525950	0.378005	0.254974	0.0662546	0	0.470534	0	0.0632022	0.123354	0	0	0	0
22	SVE_0000533850	0.389664	0.30226	0	0	0.134751	0.392264	0.113294	0	0	0.205592	0.214979	0.0911384
23	SVE_0000569650	0	0	0.138705	0.203745	0	0	0	0.0619798	0	0	0	0.0623733
24	SVE_0000572950	0	0	0	0	0	0	0	0	0	0	0	0
25	SVE_0000600	0.0650435	0	0	0	0	0	0.0651148	0	0.078413	0.153517	0	0.143354
26	SVE_0000657250	0	0	0	0	0	0	0	0.0641988	0	0	0	0
27	SVE_0000660650	0.209865	0.365922	0	0	0	0	0	0.123876	0	0	0	0.0604209
28	SVE_0000661550	0.194777	0.0637747	0	0.0612339	0.0924909	0.27278	0.124631	0.184471	0	0	0	0
29	SVE_0000662550	0	0.0613419	0.650908	0.627068	0	0.0862119	0	0	0	0	0	0
30	SVE_0000699050	0.192837	0.065328	0	0	0.0953576	0.183326	0.0618461	0	0	0.0693376	0	0
31	SVE_0000710550	0.13141	0.196379	0.068084	0	0	0	0	0.0635751	0.0771307	0.149466	0.206899	0
32	SVE_0000720350	0.192804	0	0	0	0.382168	0.0908917	0.0642791	0	0.150058	0	0.0677372	0
33	SVE_0000860150	0.184447	0.0625482	0	0	0.0922864	0.0877996	0	0	0	0	0	0
34	SVE_0000870250	0.325882	0.127813	0	0	0.454688	0	0.0630389	0.186196	0.0782443	0.0766151	0.22524	0
35	SVE_0000881350	0.186977	0.12694	0	0.0653682	0	0	0	0	0	0	0	0
36	SVE_0000894350	0	0	0	0	0.0876159	0	0	0	0	0	0	0
37	SVE_0000936150	0	0	0	0	0	0.172106	0	0	0	0	0.143974	0
38	SVE_0000939350	0	0	0	0	0	0	0	0.128398	0	0	0	0
39	SVE_0000940450	0	0.0666036	0	0.0684824	0	0	0.0628669	0	0.0712068	0	0	0
40	SVE_0000945750	0	0	0.0615892	0.0601856	0.090697	0.264967	0	0	0	0	0	0
41	SVE_0000992650	0	0	0	0	0	0	0	0.0641988	0	0	0	0
42	SVE_0001000000	0	0.0660498	0	0.0620196	0	0	0.0645242	0.126194	0	0	0	0
43	SVE_0001000100	0.0633977	0.318059	0.61273	1.11678	0	0.0897931	0	0.12189	0.0720853	0	0	0
44	SVE_0001000200	0	0	0	0.0653049	0	0.180675	0.0638869	0.0624994	0.223713	0	0	0
45	SVE_0001000300	0.126817	0.125481	0	0.0622405	0.0922332	0.267334	0	0	0.074693	0	0	0
46	SVE_0001000400	0.128635	0.126199	0.124191	0	0.0915639	0.269517	0	0	0.0749601	0	0	0
47	SVE_0001000500	0.129499	0.128428	0.0662018	0.0646176	0.1898	0	0.128748	0.125423	0.0765273	0.0740494	0.0686917	0
48	SVE_0001013900	0	0	0	0	0	0.0889134	0.126047	0	0	0	0	0
49	SVE_0001071900	0.064142	0.0628329	0	0	0	0	0	0	0	0	0.0746414	0
50	SVE_0001100	0.324855	0.127395	0.0612527	0.119854	0.177659	0.260353	0.192621	0.441865	0.237506	0.387089	0.375562	0.0737483
51	SVE_0001133000	0.199512	0.133738	0.140458	0.0694033	0.293544	0.185254	0.0611959	0.0605759	0.0683499	0	0	0.0604892
52	SVE_0001400	0.326609	0.256944	0.247229	0.0602408	0.0923962	0.18108	0	0.245164	0.229585	0.0752808	0.0733825	0.0727953
53	SVE_0001700	0.0663007	0.130222	0	0	0	0	0.0638771	0.1258	0.157797	0	0	0
54	SVE_0001900	0.130913	0.385349	0.12309	0.120384	0.184392	0.0896814	0	0.0620877	0.0779702	0.229481	0	0
55	SVE_0003000	0.197137	0.128683	0.306298	0.179867	0.0909906	0.44603	0.128237	0.126365	0	0.0780436	0	0
56	SVE_0003700	0.323742	0.31703	0	0	0.175867	0.257651	0.128811	0.442714	0.235408	0.460647	0.147367	0.434364
57	SVE_0004000	0	0.0766285	0	0.202189	0	0	0	0	0	0.126643	1.00615e-09	0
58	SVE_0004700	0	0	0	0.0606887	0	0	0.387592	0.317191	0.315004	0.539338	0.147971	0.363441
59	SVE_0004800	0	0	0	0	0	0	0	0	0	0	0	0
60	SVE_0005400	0	0	0	0	0	0	0.575969	0.250902	0.156787	0.229955	0.299573	0.147215
61	SVE_0006300	0	0	0	0	0	0	0	0.064199	0	0	0	0
62	SVE_0008500	0.0644725	0	0	0	0	0	0.190822	0.187657	0	0.153813	0.0748695	0.0734897
63	SVE_0008600	0.0659514	0	0.185608	0.121114	0	0	0.0650083	0.0639165	0	0	0.153278	0
64	SVE_0008800	0.644464	0.505069	0	0	0	0.0865763	0.253514	0.124725	0.0785263	0.383925	0.14998	0.0736709
65	SVE_0009000	0	0.127316	0.181962	0.23749	0.0900979	0.265007	0.190191	0.0623889	0.157559	0.154453	0.0755974	0.0746621
66	SVE_0010200	0.454977	0.127399	0.553825	0.240809	0.177356	0.0866281	0.128727	0.0632544	0.237195	0.154658	0.149539	0.0734273
67	SVE_0010600	0.196009	0	0	0	0.373787	0.456929	0.0629026	0.0620247	0.0759911	0	0	0.0695357
68	SVE_0010800	0.0646791	0.128414	0	0	0	0.174686	0.0651473	0	0.157188	0.0768767	0	0.145701
69	SVE_0010900	0.0653069	0	0	0.123079	0.220336	0.476996	0.0652126	0.255971	0	0	0	0
70	SVE_0011000	0.26054	0	0.306844	0.419524	0.183915	0.17874	0.0627385	0	0	0.0760349	0	0.0739431
71	SVE_0011100	0.0654509	0.129011	0.125059	0	0.0928862	0.363448	0.0627279	0.122727	0.152715	0	0	0
72	SVE_0011200	0	0.126389	0	0	0.0928414	0.26931	0	0.0614615	0	0.0727955	0	0
73	SVE_0012300	0.128963	0.0631736	0	0	0.439019	0.257301	0	0.251402	0	0.153214	0.073838	0.145053
74	SVE_0012500	0.25895	0.064029	0.378795	0.309685	0.464772	0	0	0.184417	0	0	0	0
75	SVE_0013300	0	0	0	0	0	0	0	0	0	0	0	0
76	SVE_0015500	0	0.064643	0	0	0	0	0	0	0.0772149	0	0	0
77	SVE_0016600	0	0	0.063435	0	0	0	0.0637472	0	0	0	0	0.0734157
78	SVE_0017600	0.194029	0.189955	0	0	0.632926	0.971642	0.124564	0.307008	0	0.227159	0.0742953	0.0738349
79	SVE_0018000	0	0.0631614	0	0	0	0	0.0635077	0.124898	0.07856	0	0.0749067	0.073516
80	SVE_0018100	0.0655326	0.192743	0.926731	1.02756	0.0895974	0.0875341	0	0	0	0	0	0
81	SVE_0018200	0.19415	0.0634478	0	0	0.884818	0.778002	0	0.0628761	0.0788587	0.0771144	0	0
82	SVE_0018900	0.128985	0.12628	0	0	0.268096	0	0	0.123763	0	0.0765984	0	0.0740548
83	SVE_0019000	0	0.256357	0.183195	0.0597748	0.0907087	0.355737	0	0.188436	0.0793134	0.0777501	0	0
84	SVE_0019100	0.131052	0.193468	0	0	0	0	0.0628861	0	0	0	0	0.145872
85	SVE_0019300	0.19413	0.126786	0	0	0.0880789	0	0.0642264	0.189281	0	0.230566	0.0740284	0.0727165
86	SVE_0019500	0.131452	0.128884	0.0618266	0.0604945	0.359891	0.175789	0.129781	0.191433	0	0	0	0
87	SVE_0020300	0.0662367	0.0653325	0.759265	0.491741	0	0	0	0.0621846	0	0.0758244	0	0.218205
88	SVE_0020400	0.131611	0.128964	0.86114	0.72213	0	0	0.0635493	0.0625238	0	0.0772428	0.0756941	0.0752325
89	SVE_0021900	0	0	0	0	0	0	0.247827	0.202303	0.363837	0.201503	0	0.121859
90	SVE_0022300	0.0643287	0.0629494	0	0	0.10878	0.0878464	0.0656846	0	0	0.0816824	0.147672	0.0796433
91	SVE_0022700	0	0	0	0	0	0	0.517413	0.48389	0.49665	0.52556	0.45593	0.329092
92	SVE_0022800	0	0	0	0	0	0	0.628756	0.752661	0.308435	0.410323	0.2329	0.0932374
93	SVE_0022900	0	0	0	0	0	0	0.224015	0.316578	0	0.0863144	0.482164	0.253584
94	SVE_0023100	0	0	0	0	0	0	0.1726	0.747062	0.233883	0.612327	0.304742	0.473243
95	SVE_0023200	0	0	0	0	0	0	0.168028	0.141794	0.0786344	0.0995269	0	0.0919754
96	SVE_0025300	0	0	0	0	0	0	0	0.062038	0	0	0	0.0737223
97	SVE_0025500	0.131597	0	0	0	0	0.0912013	0.18936	0.185216	0.154174	0	0.147837	0
98	SVE_0026400	0.262391	0.0641912	0.0613098	0.180102	0.458976	0.358318	0.0631404	0.124382	0	0	0.0752926	0
99	SVE_0026500	0.26135	0.450675	0	0	0.186289	0.54624	0.0625637	0.370334	0.0763861	0.225506	0.14391	0.143294
100	SVE_0026600	0.0660611	0	0	0	0	0	0	0.124366	0	0	0	0.145138
101	SVE_0026700	0	0	0	0	0	0	0.198693	0.128053	0.0776786	0	0	0
102	SVE_0026800	0	0	0	0	0	0	0.260353	0.319786	0.157151	0.153232	0.145281	0.0715972
103	SVE_0026900	0	0	0.0615102	0.059866	0.182847	0.0890962	0	0	0	0	0	0.0705505
104	SVE_0027000	0.130138	0.0637776	0	0	0	0	0.0629749	0.124062	0.0781898	0	0.149984	0.0743604
105	SVE_0027400	0.326068	0.255548	0.121648	0	0	0	0.0634771	0.124806	0.394046	0.231746	0.151268	0.14947
106	SVE_0027800	0.391514	0.255556	0.24392	0.0596799	0.364954	0.178211	0.251923	0.0619936	0	0.076526	0.0750355	0.0745832
107	SVE_0027900	0.0650578	0.191116	0.124437	0.0608651	0.794883	0.431299	0.194214	0.1907	0.07882	0.162103	0.147938	0.145354
108	SVE_0028000	0.130704	0.064746	0.0642493	0	0	0	0	0	0	0	0	0.069242
109	SVE_0028400	0.132467	0	0	0	0	0	0.194402	0.12772	0	0	0	0
110	SVE_0028500	0	0	0	0	0	0	0.134749	0.130263	0.0790195	0.0765626	0.070655	0.139046
111	SVE_0029100	0.193384	0	0	0	0.704248	0.516	0.446422	0.501487	0.156949	0.0767458	0.222961	0.0729792
112	SVE_0029500	0.32506	0.257309	0.523007	0.382887	0.567394	0.274094	0.128183	0.187964	0	0.0738059	0.205165	0.0677179
113	SVE_0030300	0.0651797	0	0	0	0	0	0	0	0	0	0	0
114	SVE_0030400	0.195335	0.063726	0.0626423	0	1.41018	0.344276	0.129955	0.255077	0	0.154038	0.0735283	0
115	SVE_0030500	0	0	0	0	0	0.171069	0	0	0	0	0	0
116	SVE_0030800	0	0.0639729	0.395907	0.451049	0.281816	0.543303	0	0.0621736	0.0756283	0	0.0678833	0.133874
117	SVE_0030900	0.0653213	0	0	0	0	0	0	0	0.0782671	0.153214	0	0
118	SVE_0031800	0.13075	0.258637	0.127508	0	0	0.091328	0.191403	0.124155	0.0765203	0	0	0
119	SVE_0031900	0	0	0	0	0	0	0	0	0	0	0.0724233	0
120	SVE_0032000	0.131584	0	0	0	0	0.0925848	0.0651591	0	0.0776995	0	0.0696406	0.0688603
121	SVE_0032100	0	0	0	0	0.093622	0	0.252899	0.309247	0.0769624	0	0.145863	0.0725866
122	SVE_0032200	0	0.197394	0	0.0652496	0	0	0.0656018	0.0641299	0	0.150834	0.140179	0.27683
123	SVE_0032400	0.0650209	0.127288	0.182121	0.237494	0.268472	0.437748	0.319038	0.534994	0.0791032	0.0773936	0.428926	0.148943
124	SVE_0032900	0.129387	0.76038	0	0.0591468	0.0890965	0.174073	0.25425	0.250061	0.31522	0.385395	0.226048	0.148191
125	SVE_0033000	0.257939	0.252734	0	0	0.809541	0.52803	0.1872	0.245759	0	0	0.074283	0.0736871
126	SVE_0033500	0	0.19718	0.0642016	0.0625799	0	0	0.127708	0.0630792	0	0.229612	0	0
127	SVE_0033600	0.327353	0.513716	0.183632	0.179608	0.0914176	0	0.126508	0.0623052	0	0.0768855	0.0754429	0.0747895
128	SVE_0033700	0.0663047	0.130524	0.251211	0.244621	0	0	0	0.062057	0	0	0.0741836	0
129	SVE_0033800	0.0656711	0	0	0.240239	0	0	0.126489	0.249168	0.0785806	0.153644	0.0754189	0.149836
130	SVE_0033900	0.132367	0	0.0623292	0.0608676	0	0	0.0637241	0	0.0786768	0	0	0.0750034
131	SVE_0034300	0	0.0637182	0.303264	0.831903	0.0900769	0.0883093	0	0.0626287	0.0789876	0.0773631	0.0758087	0
132	SVE_0034400	0.128877	0.37883	0	0	0.0898842	0	0.0623551	0	0	0.303095	0.0742296	0.147268
133	SVE_0035200	0.455134	0.322081	0.383532	0.125634	0.281851	0.364163	0.0639241	0	0.0765112	0.149273	0.0695865	0.0688894
134	SVE_0035500	0.130097	0.0636612	0.424454	0.237388	0.358044	0.0876097	0.0637845	0.0627782	0.158229	0.077367	0.227146	0.0744651
135	SVE_0036700	0.12926	0.253284	0	0	0.176043	0.25794	0.576998	0.314933	0.0785059	0.153587	0.518265	0.218165
136	SVE_0037300	0	0	0	0	0.162472	0	0	0	0	0	0	0
137	SVE_0037400	0.197112	0.322864	0.0621397	0.303163	0.278972	0.545544	0.0919799	0.061686	0.076953	0.128411	0.0739422	0
138	SVE_0037700	0.265084	0.194526	0	0.0604449	0	0	0	0.0638933	0	0	0	0
139	SVE_0038800	0.451069	0.315254	0	0	0.266071	0.26051	0.252356	0.0621423	0	0.153058	0.0749813	0.0737125
140	SVE_0039200	0.393075	0.38524	0.122321	0.119747	0.456901	0.357572	0.380178	0.124778	0	0.231108	0.150896	0
141	SVE_0040400	0.0655789	0.0649709	0.386834	0.253431	0	0	0	0	0	0	0.0701856	0.0694825
142	SVE_0041600	0	0.129225	0.316291	0.0616512	0	0	0	0	0	0	0	0.0713121
143	SVE_0042500	0.517631	0.697117	0	0	0.0879667	0.257759	0.257179	0.189443	0.235449	0.0767816	0.0738161	0.0725166
144	SVE_0042800	0.196421	0.0643667	0.50964	0.373519	0.281439	0.639494	0.0632198	0.124243	0.0763203	0	0.141111	0.0695419
145	SVE_0042900	0.065109	0.0639604	0	0.0598774	0.0919339	0.625364	0.0626503	0.061517	0	0	0	0.0737547
146	SVE_0043600	0	0.511695	0.369549	0.542319	0	0	0.12904	0.0634243	0	0.233135	0.30128	0.0739565
147	SVE_0043700	0.13108	0.128534	0.244318	0.0598223	0.0911842	0.0892253	0.0635932	0	0.0789383	0.0773769	0	0
148	SVE_0044800	0.129968	0.381831	0.305419	0.298574	0.459032	0.267426	0	0	0	0	0	0
149	SVE_0045400	0.130522	0.063958	0.367837	0.0599897	0.536539	0.261977	0	0.126644	0	0	0	0.148746
150	SVE_0045500	0	0	0	0	0.181448	0	0.0642256	0.0632414	0	0	0	0
151	SVE_0045600	0.153659	0.0764635	0	0.0934979	0.364806	0.235459	0.186281	0.0845598	0.251736	0	0.0744053	0.219234
152	SVE_0045700	0	0	0	0	0	0	0	0	0	0	0	0
153	SVE_0045800	0.0649796	0	0	0	0	0	0.255174	0.0627479	0.0790863	0	0.0756367	0
154	SVE_0045900	0	0	0	0	0	0	0	0	0	0	0	0
155	SVE_0046400	0.128298	0.0631777	0.246847	0.180459	0.0917195	0.447235	0	0	0	0	0	0
156	SVE_0048100	0.0655249	0.128318	0.429399	0.240299	0.183976	0.358509	0	0.372511	0	0	0	0
157	SVE_0048400	0.255222	0.254269	0.528927	0.257762	0.375578	0.09	0	0.0617371	0.149801	0	0.0669722	0
158	SVE_0048900	0.262733	0.193024	0.122599	0.0600062	0	0.268851	0.0635966	0.12528	0.315782	0.231767	0	0.225212
159	SVE_0049800	0.130451	0.383558	0.305505	0.0597961	0.0895113	0.0874306	0.192639	0.442026	0.159021	0.155446	0	0.297908
160	SVE_0049900	0	0.0649464	0	0	0	0	0.0636123	0.249376	0	0	0.0753793	0
161	SVE_0050400	0	0	0	0.186691	0	0	0	0	0	0	0	0
162	SVE_0050500	0.358539	0.265039	0	0	0	0	0	0.104481	0.0779509	0.128759	0.104527	0.111603
163	SVE_0050800	0	0.0612463	0	0	0.0898733	0.0867739	0	0	0	0	0	0
164	SVE_0051000	0.327405	0.321206	0.0632192	0.246557	0.279661	0.274393	0.250794	0.123829	0.152633	0	0.0713667	0
165	SVE_0051100	0	0.127611	0	0	0.184008	0.449155	0.0624517	0	0.0762833	0.0749583	0	0
166	SVE_0051400	0.19363	0.257209	0.200641	0.0651854	0	0.364162	0.0646008	0.187352	0	0.073411	0.0677466	0
167	SVE_0051600	0.194855	0.382116	0	0.296785	0.0906241	0.0887119	0.0628215	0.247405	0.155949	0.0763509	0.0748212	0.0742498
168	SVE_0051700	0.193745	0.443034	0	0	0.352369	0.258165	0.0639664	0.251447	0	0.0768235	0.22276	0.0729222
169	SVE_0052800	0.264262	0.260245	0.0630291	0.368173	0	0.0912972	0.0631365	0.123713	0.0769014	0	0.145356	0.0723895
170	SVE_0053300	0.262127	0.129044	0.0631699	0.12313	0	0	0	0	0	0	0	0
171	SVE_0054100	0.0650043	0.127308	0	0	0	0	0	0	0.0786233	0	0	0
172	SVE_0054900	0.131326	0.515819	0.434455	0.36319	0.0929026	0.181165	0.252348	0.246637	0.154252	0.227394	0	0.0732722
173	SVE_0055600	0.0646789	0.0633036	0	0	0.0893244	0.0875325	0	0.0622656	0.0785605	0	0	0
174	SVE_0057300	0.0653261	0.449077	0.122984	0.30059	0.184493	0.268759	0.125876	0.0619756	0	0	0	0.0742242
175	SVE_0058800	0	0.0635459	0.261001	0.127539	0	0.0899796	0	0	0.0758193	0	0	0.0668916
176	SVE_0058900	0.131043	0.384989	0.500733	0.673538	0	0.0869238	0.195492	0.191975	0	0.155401	0	0
177	SVE_0059200	0	0.129628	0.248753	0.0607701	0	0.29474	0	0.0624023	0	0	0	0
178	SVE_0059900	0.262537	0.129476	0.313483	0.0609085	0.0930983	0.104505	0.125677	0.123238	0	0.225404	0.289408	0
179	SVE_0060200	0.588557	0.256261	0.0609936	0.417622	0.817317	0.355608	0.0636541	0.0625772	0.0790292	0	0	0.0749435
180	SVE_0060300	0	0	0	0	0	0	0	0.0641986	0	0	0	0
181	SVE_0060400	0.0834075	0.127326	0	0.060388	0.796525	0.432254	0	0.0633213	0	0	0.0744518	0
182	SVE_0060500	0	0	0	0	0	0	0	0.0798955	0	0	0	0
183	SVE_0060600	0.194551	0	0	0	0.0883213	0	0.128659	0.0632014	0.0787736	0	0.0742904	0
184	SVE_0060700	0.281797	0.189858	0	0	0.089449	0.000853083	0.315487	0.186431	0	0.114454	0	0.148418
185	SVE_0060800	0	0	0	0	0	0	0.0627439	0	0	0	0.148175	0.112967
186	SVE_0060900	0.214637	0.325413	0.13539	0.0929454	0.0913878	0.620922	0.216478	0.135416	0.0858294	0.0807379	0.0781701	0
187	SVE_0061000	0.195204	0.149261	0.184782	0	0.0886174	0.2597	0.32194	0.189818	0.158038	0.169578	0	0.0802123
188	SVE_0061100	0.645205	0.127517	0.168976	0.17954	0	0.0897649	0	0	0	0	0.052202	0.136584
189	SVE_0061200	0.0641649	0.0650227	0.0687369	0	0.19281	0	0.125649	0.0612366	0.0365781	0	0	0
190	SVE_0061300	0	0.0642084	0	0.0600945	0	0.0896246	0.252504	0.311029	0.235324	0.0767796	0	0.374158
191	SVE_0061400	0	0.185467	0	0	0.35562	0.260672	0	0	0	0	0	0
192	SVE_0061500	0.681936	0.149414	0.0981405	0	0.293087	0	0.0448427	0.0631189	0	0.190712	0.160127	0.163756
193	SVE_0061700	0.0675958	0	0	0	0	0	0.524103	0.385985	0.0841436	0	0.0740979	0.145561
194	SVE_0063400	0.0641994	0	0.131866	0.0644255	0.094037	0	0.128412	0.187246	0.151593	0.0736244	0	0
195	SVE_0063800	0	0	0.0628529	0	0	0.488542	0.111743	0.062457	0.117204	0.153516	0	0
196	SVE_0064000	0.522381	0.319533	0.0616357	0	0.55361	0.23954	0.328736	0.122494	0.114934	0	0.295529	0.219173
197	SVE_0065100	0.517792	0.253589	0	0	0.0880203	0	0.642959	0.252609	0.157053	0.0768224	0.369455	0.508117
198	SVE_0065200	0.260273	0.382589	0	0	0	0	0.0644615	0.253383	0	0	0	0.146871
199	SVE_0065300	0.13068	0	0.247659	0.0605722	0	0	0	0.0636101	0.0794539	0.0777124	0	0.0737422
200	SVE_0065400	0.327831	0.192807	0.358548	0.120183	0.180179	0.17605	0	0	0	0	0	0
201	SVE_0065500	0.129951	0.254771	0.0708059	0	0	0	0.319848	0.125821	0	0.0774408	0.302533	0.148413
202	SVE_0066600	0.32514	0.382408	0	0.0601829	0.266268	0.086706	0.257478	0.442852	0	0.232168	0.074876	0
203	SVE_0067200	0.260711	0.127637	0.182243	0.535071	0.181002	0.354182	0.316758	0.249104	0	0.154346	0.150888	0.149126
204	SVE_0067500	0.130196	0	0.182545	0.178462	0.179248	0	0	0.0628925	0	0	0.0757957	0.0745788
205	SVE_0067800	0.261458	0.256043	0	0	0	0	0.195035	0	0	0	0	0
206	SVE_0068000	0	0	0	0	0	0	0	0	0	0	0	0
207	SVE_0068100	0	0	2.80548e-05	5.69561e-05	0	0	2.76616e-08	0	0	0	0	1.89e-05
208	SVE_0068200	0.127567	0.251603	0.316468	0.310117	0.553337	0.712606	0	0.122541	0	0	0	0
209	SVE_0068300	0.2608	0.0645897	0	0	0.189782	0.55051	0.193718	0.0628183	0	0.148806	0.138029	0.0682408
210	SVE_0068400	0.129695	0.317671	0	0	0.176635	0	0.460628	0.270405	0.0831616	0.155901	0	0.226083
211	SVE_0068900	0	0.0644349	0.191317	0.311595	0.187825	0	0.0632868	0	0	0	0.0706301	0.0696155
212	SVE_0069100	0.0663754	0	0.0641498	0	0	0	0	0.0628647	0	0.0794651	0.0725168	0.214766
213	SVE_0069300	0	0	0	0	0	0	0.0651237	0.0635871	0.079547	0	0	0
214	SVE_0069500	0.199651	0.326302	0	0	0	0	0.063696	0.378181	0.0775994	0	0.145416	0.071777
215	SVE_0069600	0.325942	0.319095	0	0	0	0	0.0649477	0.127517	0.157795	0.154408	0	0
216	SVE_0070100	0	0.0650887	0	0.0624525	0	0	0	0.0627313	0	0	0.0723082	0
217	SVE_0070200	0.0651795	0	0	0	0	0	0	0	0	0	0	0
218	SVE_0072300	0.130544	0.127761	0.244096	0.119407	0.0912981	0.0891669	0.314811	0.310037	0.156317	0.459151	0.225208	0.149141
219	SVE_0073600	0	0.0752294	0	0	0.0919308	0	0	0.096798	0	0.109957	0.121062	0.0724598
220	SVE_0073700	0.064601	0.182313	0	0.0656363	0.095547	0	0.0646121	0.0628569	0.151049	0	0.0676579	0
221	SVE_0074800	0.0648286	0.190479	0	0	0	0	0.128878	0	0.0786142	0.153824	0	0.0726049
222	SVE_0074900	0	0.0637158	0	0	0	0	0	0	0	0	0	0
223	SVE_0075000	0.0649629	0.317802	0	0	0.263326	0.257128	0.194838	0.254871	0.313612	0.460443	0.146098	0.287228
224	SVE_0075600	0	0	0	0	0	0	0	0.0641988	0	0	0	0
225	SVE_0075700	0.33623	0.0668183	0	0	0	0	0	0	0.156218	0.0764853	0	0
226	SVE_0076900	0	0	0	0.119915	0.272271	0.0889749	0.064151	0.0631998	0	0	0	0
227	SVE_0077000	0.13227	0.0646947	0	0	0	0	0.193183	0.0633909	0	0	0	0
228	SVE_0077100	0.199613	0.0652752	0	0	0	0	0.0639541	0.0628881	0	0	0	0
229	SVE_0077200	0.0671789	0	0.125616	0.0614319	0	0	0	0.0639311	0	0	0	0
230	SVE_0077300	0	0	0	0	0	0.090025	0.124514	0	0	0	0	0
231	SVE_0077400	0	0	0	0	0	0	0	0	0	0	0	0
232	SVE_0077500	0	0	0	0	0	0	0.127278	0.0626819	0	0	0	0.0751207
233	SVE_0077600	0	0	0	0	0	0	0.0656393	0.12762	0.0786202	0.0767285	0	0
234	SVE_0077700	0	0	0	0	0	0	0	0.0626452	0.155685	0	0	0.0734714
235	SVE_0077800	0	0.0642572	0	0	0	0	0	0	0	0	0.0718143	0
236	SVE_0077900	0	0.0638128	0	0	0	0	0	0	0	0.076589	0	0
237	SVE_0078100	0.0650683	0.445816	0	0	0	0	0.129815	0.12741	0.0786729	0	0	0.0722839
238	SVE_0078300	0.977664	0.638837	0.367232	0.0598925	0.0893458	0.174507	0.128568	0.189636	0.079486	0.0777493	0.151386	0
239	SVE_0080100	0.065264	0.0640255	0	0.05996	0	0.089545	0	0.0616841	0	0	0.0743764	0
240	SVE_0080200	0.0649769	0.0636656	0.0606624	0	0.18127	0.177352	0.125752	0	0.156084	0.0764065	0.0748496	0
241	SVE_0080300	0.12831	0	0.461598	0.581479	0	0	0.0641157	0	0.0756277	0	0	0
242	SVE_0080700	0.0654944	0	0	0	0.186397	0.272363	0.125502	0.0616496	0.152919	0.375546	0.144391	0.0719469
243	SVE_0080800	0.0664576	0	0.127751	0.124247	0	0	0.318785	0.250578	0.155427	0	0.293485	0.0730766
244	SVE_0081200	0.0662573	0	0.195418	0.192039	0	0	0.260565	0.190113	0.155937	0.076058	0.0709115	0.140402
245	SVE_0081300	0.132778	0.130733	0.255986	0.187112	0	0	0.381777	0.251344	0.155072	0.303913	0.218681	0.144289
246	SVE_0081400	0.065546	0.129933	0	0	0	0	0.25909	0.0633193	0	0	0	0
247	SVE_0082100	0.131127	0.128195	0.184929	0.240629	0.0924645	0.359696	0.251087	0.430628	0.231071	0	0.0743032	0.0735591
248	SVE_0084100	0.0651576	0	0.30619	0.179768	0	0	0.192873	0.252941	0.158987	0.310938	0.0756335	0.0742444
249	SVE_0085600	0.129772	0	0	0	0.181452	0.0886054	0.250509	0.0616455	0	0.0760964	0.0746142	0
250	SVE_0086400	0.192487	0.125632	0	0	0.0883285	0	0	0.0619445	0.0780709	0	0.074685	0.0734931
251	SVE_0086700	0.129573	0.126901	0	0	0	0	0.257609	0.316243	0.157114	0.230568	0.295358	0.0725425
252	SVE_0087400	0	0.0644879	0	0	0.371669	0	0	0.0614372	0.0763413	0	0	0
253	SVE_0087500	0.129615	0.0635312	0	0	0.0892024	0.609617	0.127501	0	0	0	0	0
254	SVE_0087700	0.0645647	0.0643234	0	0	0	0	0	0	0	0	0	0
255	SVE_0087800	0.256282	0.125493	0	0	0	0	0	0	0	0	0	0.0735939
256	SVE_0087900	0.193468	0.126448	0	0	0	0	0	0	0.0776939	0	0.0743888	0
257	SVE_0088500	0.327433	0	0.0613488	0.0600431	0.449372	0.351093	0	0	0	0.156084	0	0
258	SVE_0088600	0.263767	0	0	0.0605537	0	0	0	0.0624432	0.0784809	0	0.0755522	0
259	SVE_0089000	0.164626	0.332185	0.130901	0.0641265	0.186274	0.0897213	0	0.0616289	0.183251	0.0727182	0	0
260	SVE_0089200	0.19473	0.445468	0	0	0.35501	0.173419	0.128284	0.441424	0.237298	0.309397	0	0
261	SVE_0089400	0.0654528	0.321391	0.123222	0.180704	0.0924254	0.26928	0.189181	0.186287	0.0778895	0.229381	0.15006	0
262	SVE_0089900	0.708706	0.505194	0	0	0.352723	0.344565	0.190764	0.187607	0.31424	0.153614	0.0747001	0.146686
263	SVE_0091800	0	0	0	0	0.351756	0.68884	0	0	0	0.151838	0	0
264	SVE_0092000	0	0	0	0	0.0876154	0	0	0	0	0	0	0
265	SVE_0092400	0.0656476	0.128797	0	0	0	0	0.126834	0.124903	0	0	0.0755941	0
266	SVE_0092500	0	0.125903	0	0	0	0	0	0.0616139	0.0778144	0.152551	0.0747492	0.147512
267	SVE_0092600	0.193689	0.126598	0	0	0	0	0.318973	0.313599	0.236043	0.15388	0.0746669	0.0733092
268	SVE_0092700	0.323806	0.12693	0	0	0	0	0.0625329	0	0.155242	0	0.149038	0.370111
269	SVE_0092800	0.710783	0.506683	0	0	0	0	0.191819	0.314231	0.235954	0.0769202	0.372332	0.0731234
270	SVE_0093000	0	0	0	0	0	0	0	0	0	0	0	0
271	SVE_0093200	0	0	0	0.0622305	0	0	0	0	0	0	0	0
272	SVE_0093300	0	0	0	0	0	0	0.0653814	0.128626	0	0	0	0
273	SVE_0093400	0.128642	0	0	0	0	0.0866784	0	0	0	0	0	0
274	SVE_0093800	0.0649038	0	0	0	0	0	0.0641448	0.0630619	0	0.0856137	0.0750218	0
275	SVE_0093900	0	0.063563	0	0	0	0	0	0.0618533	0	0	0	0.148268
276	SVE_0094000	0.0649021	0	0	0	0	0	0.194298	0.0635618	0.156895	0.0767732	0.219894	0.144076
277	SVE_0094100	0.0659654	0	0	0	0	0	0.0647185	0	0	0	0	0
278	SVE_0094200	0	0	0	0	0	0	0	0	0.0783359	0	0	0
279	SVE_0094300	0.133365	0	0	0.0412838	0	0	0	0	0	0	0	0
280	SVE_0094400	0.0655839	0.0642564	0	0	0	0	0.377916	0.185596	0	0.152495	0.223864	0.148147
281	SVE_0095200	0	0	0	0	0	0	0	0	0	0	0	0
282	SVE_0096600	0.260352	0.0637884	0.550292	0.119661	0.178372	0.0870941	0.128423	0.252616	0	0	0.302262	0.296704
283	SVE_0096700	0.163761	0.256237	0.312442	0.366779	0	0	0.585511	0.447203	0	0.155145	0.223406	0
284	SVE_0096800	0	0.131498	0.0636752	0.123718	0	0	0.127639	0	0	0	0	0
285	SVE_0096900	0.063559	0	0.258161	0.44043	0	0	0	0	0	0	0	0
286	SVE_0097200	0	0	0	0	0	0	0.190866	0.250614	0	0.0773176	0.0758383	0
287	SVE_0097700	0.330003	0.387803	0.186118	0.181946	0.0932424	0	0.253087	0.186231	0.0778424	0.22952	0	0.0743591
288	SVE_0099300	0.129256	0.128187	0.198233	0.257985	0	0	0.19276	0.0625936	0.229152	0	0	0
289	SVE_0100300	0.259964	0.262336	0.0570225	0	0	0	0.252755	0.252576	0.0776984	0	0.142329	0.0351724
290	SVE_0100600	0.717174	0.511388	0.613294	0.240032	0	0	0	0	0.0794989	0.155506	0.151166	0
291	SVE_0100900	0	0	0	0	0	0	0	0.0628987	0.0790218	0.0776185	0	0
292	SVE_0101700	0.193112	0.37784	0	0	0.797128	0.433615	0	0.0620926	0	0	0.0749014	0
293	SVE_0101900	0.0654305	0.0640648	0	0	0	0	0.325695	0.0639554	0	0	0	0
294	SVE_0103100	0.0645309	0.0632522	0	0	0	0.0864419	0	0.0625476	0	0	0	0.0736346
295	SVE_0104800	0.253629	0.125479	0.191287	0.124479	0.276694	0.534657	0	0.122216	0	0	0	0
296	SVE_0104900	0.129756	0.254482	0.313513	0.5499	0.369881	0.724681	0	0	0.0756497	0.148234	0	0
297	SVE_0105100	0.262385	0.0642456	0.0613141	0.119885	0	0	0.06443	0.190122	0.0798963	0.0781299	0	0.0751497
298	SVE_0105600	0.38994	0.572496	0	0.0611191	0.35201	0.257818	0.0648337	0.190896	0.235722	0.15379	0.146901	0.144372
299	SVE_0106700	0.260959	0.0638797	0.060809	0	0.363356	0.355766	0.568148	0.373175	0.0784461	0.230046	0.150401	0
300	SVE_0106800	0	0.0632553	0.12771	0.250226	0.185861	0.269568	0	0.123042	0	0	0	0.0668309
301	SVE_0106900	0.195197	0.318865	0.244355	0.059782	0.624304	0.696848	0	0.0630945	0.0793514	0.155231	0	0.0742039
302	SVE_0107200	0.196822	0.580047	0.1854	0.181006	0	0.0900209	0.0631294	0.123975	0.077877	0.0764941	0.0748953	0.0743188
303	SVE_0108100	0.4557	0.319842	0.0613758	0.11982	0.0919534	0.357434	0.0627079	0	0.154951	0	0	0.147919
304	SVE_0108200	0.0653043	0	0.122431	0	0.0916905	0	0	0.123709	0.155681	0.0762287	0	0.0743568
305	SVE_0108300	0.195343	0.382731	0.185852	0.363634	0.620359	0.34626	0.129266	0	0.237156	0.231994	0	0.219475
306	SVE_0108400	0	0.0657456	0.563692	0.490051	0	0	0.261585	0.128652	0	0	0	0
307	SVE_0108500	0.195563	0.127614	0	0	0	0.356585	0.0627825	0	0	0	0	0
308	SVE_0109100	0.130392	0.255586	0.182354	0.596003	0.0908582	0.0889818	0.12627	0.311289	0	0.15349	0.376046	0.148985
309	SVE_0109200	0	0.128476	0	0.0600082	0	0	0.189727	0.249267	0.235613	0.461208	0.226166	0.224805
310	SVE_0109400	0.260945	0.76704	0.123856	0.0605843	0.444434	0.260482	0.129368	0.0635548	0.0792713	0	0.0748114	0
311	SVE_0109600	0.390003	0.127433	0.302943	0.712502	0.543032	0.354613	0.0629686	0	0.156563	0.0766118	0.149933	0.0743112
312	SVE_0110000	0	0	0	0	0.179077	0.174833	0.0639911	0.0629343	0	0	0	0
313	SVE_0110300	0.261796	0.192202	0.548687	0.179191	0.904169	0.265913	0	0.188934	0.0795218	0.0777563	0	0
314	SVE_0111000	0.458602	0.4492	0.312165	0.488614	0	0	0.0650811	0	0	0	0.0747935	0
315	SVE_0111100	0.130957	0.128264	0	0	0	0	0.0650708	0.127817	0	0	0	0
316	SVE_0112100	0	0	0.120559	0	0.0900178	0.0879196	0	0	0	0	0	0
317	SVE_0112200	0.198974	0	0.247227	0.0604773	0.182517	0	0	0	0	0	0	0
318	SVE_0112900	0.261381	0.128119	0.554923	0.361939	0	0	0	0	0.0795976	0	0	0.148203
319	SVE_0113200	0.0649744	0.127323	0	0	0	0	0.322179	0.253235	0	0.154434	0.0744789	0
320	SVE_0113500	0	0	0	0	0	0	0.254912	0.18826	0.0787144	0	0.0758251	0
321	SVE_0113700	0	0	0	0	0.0907564	0	0	0.345713	0	0.151338	0.0742363	0
322	SVE_0113800	0.0649483	0.0645413	0	0.126591	0.0944556	0	0.0643755	0.125328	0	0.0747766	0	0.0690065
323	SVE_0114000	0	0	0	0	0	0	0	0	0.0772223	0.0759958	0.0741622	0
324	SVE_0114100	0.0665973	0	0	0	0	0	0	0.0644532	0.0784012	0	0	0.0693918
325	SVE_0114500	0	0	0	0	0	0	0.128524	0.252599	0.157758	0	0.0745437	0
326	SVE_0114600	0.327764	0.192743	0	0.0598023	0.0911185	0.446196	0.0636751	0.0625685	0	0	0	0
327	SVE_0114700	0.129362	0.189905	0	0	0.445027	0.261344	0.0634241	0.124847	0	0.0769299	0	0.0740444
328	SVE_0114800	0.259785	0.0637139	0.0610635	0	0.642849	0.623764	0.124849	0	0	0.151261	0.0740144	0
329	SVE_0115000	0	0	0.12388	0.180811	0.18364	0.269237	0	0	0	0.0740996	0	0
330	SVE_0115300	0	0	0.0613631	0.1802	0.0911516	0	0.0641385	0	0	0	0.0764815	0
331	SVE_0115400	0.130994	0.0642506	0.0612336	0.239528	0.366082	0.268693	0.126543	0.0623085	0.0785156	0	0.0754207	0
332	SVE_0117300	0.195042	0.0637124	0.36531	0.119136	0.357365	0.436547	0.127931	0.125891	0.0792303	0	0.0757251	0.148575
333	SVE_0117400	0.0649827	0.445692	0.0616985	0.0603598	0.177066	0	0	0.379874	0.552699	0.154465	0.298017	0.292709
334	SVE_0118400	0	0	0	0	0	0	0	0	0	0	0	0
335	SVE_0119000	0.195265	0.191337	0.0608725	0.0595372	0.448048	0.700014	0.127993	0.125857	0	0	0.0758145	0.07452
336	SVE_0119300	0.455365	0.19202	0	0.124139	0	0	0	0	0	0	0	0
337	SVE_0120100	0.129179	0.12662	0	0	0	0	0	0.125196	0.0787437	0	0.150153	0
338	SVE_0120300	0.128846	0.378278	0	0	0.71011	0.434757	0.504235	0.124229	0.0782765	0.153079	0.149963	0.147496
339	SVE_0120900	0.259629	0.445201	0	0	0	0	0.386058	0.189666	0.315546	0.154323	0	0.0731463
340	SVE_0121000	0.066029	0.0646151	0	0	0	0	0.064459	0.0635055	0	0	0	0
341	SVE_0123300	0.0652552	0.192156	0.430084	0.360022	0.276768	0.627253	0.188303	0.123398	0	0.228173	0.223313	0.073842
342	SVE_0123500	0.261923	0.193901	0.0629366	0.122421	0.466759	0.182091	0.314099	0.0617238	0.229714	0.0752956	0	0.144005
343	SVE_0123900	0.131375	0.064394	0.0614492	0.0601165	0	0	0.387699	0.127099	0.240103	0	0.153092	0
344	SVE_0124100	0.709619	0.189491	0.240405	0	0.535026	0.611638	0	0.186239	0.156705	0.0766648	0.075096	0.0739936
345	SVE_0125200	0.325082	0.25449	0.1823	0.119004	0.545891	0.532714	0	0	0.0777449	0	0.149251	0
346	SVE_0126300	0.131233	0.256598	0.0616933	0.120412	0.0925393	0.269991	0.0628224	0.061568	0	0	0	0.0736187
347	SVE_0126700	0.195659	0	0.304335	0.238332	0.272681	0.444923	0	0.310991	0.156777	0.306842	0	0.149082
348	SVE_0127600	0.132495	0.064859	0.0620999	0.0607661	0	0	0.0637928	0.188243	0.0789647	0	0	0.150861
349	SVE_0127800	0.193997	0.380251	0	0	0.265973	0.0866034	0.063741	0.0626705	0.0788289	0	0	0.0737657
350	SVE_0127900	0.129399	0.380225	0	0	0	0	0	0.0625211	0	0	0.0753562	0
351	SVE_0128000	0	0.063882	0.061576	0	0	0	0.0644732	0.316867	0.0793428	0.15519	0	0.0737934
352	SVE_0128100	0.128279	0	0	0	0	0	0	0.185132	0	0.0762106	0.0746925	0.147093
353	SVE_0128200	0.131092	0.12837	0.366868	0.538129	0	0.089093	0.0638288	0.188198	0.158558	0.23306	0	0.225568
354	SVE_0129500	0.258985	0.127599	0	0.0605864	0.369208	0.180432	0.0619976	0	0	0	0.0713039	0
355	SVE_0129600	0.130165	0.127484	0.424893	0.297169	0.270574	0.0884328	0	0.187725	0.315903	0.154671	0.227254	0
356	SVE_0130700	0	0.0638012	0	0	0.364951	0.356141	0.0627569	0.0618132	0	0	0	0
357	SVE_0131000	0.195172	0.127541	0	0	0.178781	0	0.128055	0.188967	0.0792982	0.232646	0	0
358	SVE_0131600	0.065077	0.0637647	0	0.119375	0.178542	0	0.0640946	0.126068	0.0793286	0.0775427	0	0.148593
359	SVE_0132000	0.0648631	0	0.0605544	0.0592801	0	0.0885072	0	0	0	0	0.0747001	0.0741273
360	SVE_0132200	0	0	0	0	0	0	0.125958	0.309963	0.156287	0.0765809	0.150075	0.148907
361	SVE_0132300	0	0	0	0	0.816644	0.617973	0	0.0300551	0	0	0	0
362	SVE_0133200	0	0	0	0	0	0	0	0	0	0	0.0724233	0
363	SVE_0134500	0.327875	0.128732	0.185225	0.301488	0.185416	0	0.252301	0.186003	0.0777538	0	0.0748025	0.37102
364	SVE_0134600	0.129838	0.381768	0	0.0600823	0	0	0.128523	0.126317	0.315985	0.154519	0.0747508	0.293624
365	SVE_0135800	0.392654	0.384828	0.305475	0.239237	0.0912822	0.357189	0.189886	0.311611	0.0785365	0.153907	0	0.149578
366	SVE_0137500	0.838788	0.379479	0	0	0	0	0.382082	0.187907	0.236046	0.307705	0.2994	0.146982
367	SVE_0137800	0.258749	0.38022	0	0	0.889535	0.695201	0.254462	0.0625957	0	0	0	0.0739465
368	SVE_0138000	0	0	0	0	0.434596	0.424299	0	0	0	0	0.0735877	0
369	SVE_0138100	0	0	0	0	0.175232	0	0	0	0	0	0	0
370	SVE_0138700	0.2605	0.318653	0	0	0	0	0.13008	0.127644	0	0	0.146824	0
371	SVE_0140300	0.455391	0.646265	0	0	0.0948334	0.183126	0.258568	0.252023	0	0.0744803	0.275755	0.341251
372	SVE_0141000	0.25794	0.127523	0.252239	0.123889	0.463343	0.360641	0	0	0.0755394	0	0.0691871	0
373	SVE_0141500	0.389566	0.254274	0	0	0.528418	0.258035	0.129323	0.126965	0.0786087	0	0	0.0723958
374	SVE_0142100	0	0.0638627	0	0	0.0915859	0.0892668	0.0628129	0.123568	0	0.0761418	0	0
375	SVE_0142900	0.193773	0	0	0	0.267954	0.525145	0.126141	0.24846	0	0.0767751	0.0752383	0
376	SVE_0143600	0.131759	0.129049	0.307056	0.180303	0	0	0.12863	0.0633591	0	0.0782472	0	0.075695
377	SVE_0147300	0.326234	0.192032	0.0616769	0.0601553	0.646322	0.270723	0.188061	0	0	0	0	0
378	SVE_0147800	0	0	0	0	0	0	0.0641865	0.0885002	0.0230822	0.00176704	0	0
379	SVE_0147900	0.0657663	0.0643676	0.061982	0.302617	0.0928454	0.0904459	0.37822	0.493622	0.0771137	0.0757747	0	0.0735892
380	SVE_0149400	0.390165	0.254857	0	0	0.0885943	0.259623	0.257932	0.31678	0.0790117	0	0	0
381	SVE_0151500	0.261847	0.128315	0.305163	0.299218	0.456143	0.625414	0.0633924	0.0625118	0	0	0	0.0747963
382	SVE_0151600	0.0618967	0	0	0	0.181067	0.0872136	0	0	0	0	0	0
383	SVE_0152400	0.325939	0.191648	0.0610479	0.119454	0.716642	0.962972	0.320683	0	0	0.155444	0	0.0744862
384	SVE_0152500	0.259989	0.445609	0.0606191	0.178067	0.540435	0.353268	0.126866	0.187478	0.0788724	0.154468	0.0756518	0.149394
385	SVE_0154400	0.126615	0.125515	0	0	0.184727	0.266591	0	0	0.0748788	0	0	0
386	SVE_0154700	0	0	0.125129	0.0613188	0	0	0	0	0	0.0791789	0	0
387	SVE_0156600	0.193605	0.126498	0	0	0.0899369	0.0880795	0.24998	0.36976	0	0.227901	0.0744466	0.0737372
388	SVE_0156700	0	0.126825	0.245726	0.358841	0.0913094	0.0889832	0	0	0	0	0	0
389	SVE_0157200	0.130548	0	0.797847	0.600534	0	0	0.322116	0.253429	0.0795922	0	0.151363	0.148613
390	SVE_0158400	0.194901	0.0637369	0	0	0.0928971	0.0911534	0.0626255	0.246872	0	0	0.210533	0
391	SVE_0158700	0.0661539	0	0	0	0	0	0	0	0.077185	0	0	0
392	SVE_0159700	0	0	0	0	0.902037	0.619116	0.126756	0.124722	0	0	0	0
393	SVE_0159800	0.131024	0.128712	0	0	0	0	0.315189	0.495181	0.155528	0.229149	0.149573	0.445266
394	SVE_0159900	0	0.0661964	0	0	0	0	0.0642952	0.12593	0	0	0	0
395	SVE_0161400	0.0666819	0.130756	0	0	0	0	0.192004	0.187896	0.0783172	0	0	0
396	SVE_0162600	0.195394	0.191435	0.185669	0.484371	0	0.259929	0.129222	0.25391	0.237336	0	0.223814	0.146557
397	SVE_0163000	0.325602	0.191148	0.364081	0.296977	0.448128	0.0877787	0.318811	0.313919	0.237476	0	0.075773	0.0744934
398	SVE_0163100	0	0	0	0	0	0	0	0	0	0	0	0
399	SVE_0165900	0.233259	0.193407	0	0.14836	0	0.0900506	0.252866	0.119429	0.0198714	0.0310749	0.0750335	0
400	SVE_0166400	0.197103	0.129495	0.688376	0.364408	0.092979	0.45449	0.125775	0.0615867	0.0766211	0	0.145724	0
401	SVE_0167100	0.195583	0.255533	0.0608287	0	0	0	0.380827	0.374227	0.157652	0.231771	0.302528	0.149563
402	SVE_0167200	0	0	0	0	0	0	0.0663096	0.0645967	0.0788282	0.152552	0	0.0698851
403	SVE_0168300	0.0656289	0	0	0	0	0	0.19364	0.126927	0	0.0782087	0	0
404	SVE_0168500	0.0658027	0.128941	0.431124	0.180786	0.27139	0.530357	0.0647185	0.0636863	0	0	0	0
405	SVE_0168900	0	0.0630682	0	0	0.264203	0.516171	0.190501	0.312263	0.0784517	0.230113	0.0746085	0.0732502
406	SVE_0169000	0	0	0	0.0593921	0.18236	0.266191	0	0	0	0.149044	0	0
407	SVE_0169400	0	0	0	0.05969	0	0.0892005	0	0	0	0	0	0
408	SVE_0170900	0.0658027	0.272164	0.245727	0.300694	0.479249	0.223371	0.0636439	0.0626652	0	0.0773771	0	0
409	SVE_0171200	0.196836	0.0643045	0	0.0607515	0	0.0874631	0.129924	0.127689	0	0	0	0
410	SVE_0171300	0.260528	0.191288	0	0	0	0	0	0	0	0	0	0
411	SVE_0171400	0.194186	0.380586	0	0	0	0	0.0641318	0.189062	0	0	0.148734	0.292142
412	SVE_0172300	0	0	0	0	0	0	0.0628476	0	0.156227	0	0	0.148952
413	SVE_0172500	0.25973	0.318112	0.333416	0.511205	0	0.22154	0	0	0.155978	0	0.149598	0.0741987
414	SVE_0172600	0	0	0	0	0	0	0	0	0	0	0	0
415	SVE_0172700	0.260934	0	0.334961	0.440208	0.454966	0.222567	0.0631244	0.0621533	0.0783505	0	0.150291	0.0745426
416	SVE_0172900	0.075986	0.308376	0.46871	0.400634	0.130087	0.101131	0.174925	0.184946	0.00612121	0.234011	0	0.25466
417	SVE_0173100	0	0	0	0	0	0	0.32098	0.273069	0	0.154408	0.209817	0
418	SVE_0173200	0	0	0	0	0	0	0.0654973	0	0	0	0	0
419	SVE_0173300	0	0	0	0	0	0.085534	0	0	0	0	0	0
420	SVE_0173500	0.259379	0.317623	0	0.0591548	0.540309	0.352428	0.252271	0.123945	0.0783279	0.0768148	0.075169	0.0742035
421	SVE_0173600	0.12879	0.189286	0	0	0.265026	0.258804	0.190287	0.06237	0.156998	0	0.0749258	0.0735203
422	SVE_0173700	0.0647386	0	0	0	0	0.0869688	0.127332	0.0626452	0	0.154267	0	0.14801
423	SVE_0173800	0	0	0	0	0	0	0	0	0	0.107652	0	0
424	SVE_0174100	0.199855	0.208532	0.325125	0.0608499	0	0	0.0653878	0.0643153	0	0	0	0
425	SVE_0174200	0.0647717	0.0709611	0	0	0	0	0.063247	0	0	0.0769297	0	0.14877
426	SVE_0174800	0.197034	0.128602	0.123131	0.0602434	0	0.0898796	0	0	0	0	0	0
427	SVE_0175100	0.0662358	0.130001	0.187712	0.366625	0	0	0.381916	0.0622087	0.15559	0.152923	0.149832	0.0739576
428	SVE_0175200	0	0.0658488	0.191316	0.123906	0	0	0.383499	0.188028	0.311334	0.122016	0	0.219929
429	SVE_0175300	0.129205	0.190012	0	0	0	0	0.383001	0.439306	0	0.562629	0.338441	0.0873941
430	SVE_0175400	0	0.036555	0	0	0	0	0.0649942	0.0889249	0	0	0	0
431	SVE_0175500	0.12969	0.0635733	0	0	0	0	0.350802	0.174046	0.203521	0.217889	0	0.31248
432	SVE_0175600	0.260167	0.318728	0	0	0	0	0.251943	0.071695	1.97143e-06	0.306252	1.58586e-08	0.148633
433	SVE_0176000	0.146505	0	0	0	1.48e-09	0	0	0	0	0	0	0
434	SVE_0176300	0.131212	0	0.253655	0.24702	0.0937763	0.0919171	0.399179	0.373198	0.536296	0.0802352	0.0717246	0.233828
435	SVE_0176400	0.0762953	0	0.0609322	0.119438	0	0	0.403496	0.458684	0.100503	0.167463	0.244961	0.300048
436	SVE_0176500	0.325378	0.191069	0	0	0	0	0.194839	0.380417	0.157301	0	0	0.144426
437	SVE_0176700	0.259735	0.0636596	0	0	0	0	0	0.186023	0.234688	0	0	0.14847
438	SVE_0176800	0.193431	0.405938	0	0	0.0881354	0.172211	0.191196	0.375927	0.235659	0.303382	0.306061	0.376398
439	SVE_0178800	0	0	0	0	0	0	0	0	0	0	0	0
440	SVE_0178900	0	0	0	0	0	0	0	0.127341	0.0789865	0	0	0
441	SVE_0179000	0	0.0653024	0	0	0	0	0.191782	0	0.0782265	0.0768031	0	0
442	SVE_0180000	0.126267	0.0628977	0.196259	0.255048	0.0929059	0.267156	0.12638	0	0	0.0718078	0	0
443	SVE_0180300	0	0.126745	0.130588	0.127603	0.093126	0	0	0.061811	0	0	0	0.06669
444	SVE_0180400	0	0	0	0	0	0	0	0	0	0	0	0
445	SVE_0180500	0.0651796	0	0	0	0	0	0	0	0	0	0	0
446	SVE_0180600	0.0633489	0.0629518	0	0	0	0.356412	0	0	0	0	0	0
447	SVE_0181500	0.325474	0.191396	0	0	0	0	0	0	0	0	0	0
448	SVE_0182300	1.19237	0.837892	0.370084	0.30259	0	0	0.06421	0	0.0798303	0	0	0.0754478
449	SVE_0188000	0	0.259468	0.247821	0.121496	0	0	0.127603	0	0.316824	0	0.0760727	0
450	SVE_0188100	0.130763	0.194309	0.19615	0.192162	0	0.0920071	0.129504	0.0629931	0	0.0746095	0.207619	0.0684307
451	SVE_0190000	0.0652479	0.191916	0	0.120371	0.276719	0.0898568	0.313125	0.122571	0	0.0752385	0.36911	0.364778
452	SVE_0190600	0	0.0319065	0.314094	0.368695	0	0	0.13023	0.372608	0	0.154193	0.0735262	0.0722674
453	SVE_0190700	0.064956	0.0635665	0	0	0.0878688	0	0	0	0.235409	0.153597	0	0
454	SVE_0190800	0.195036	0.0318106	0	0	0	0.257638	0.259677	0.0753441	0.0785372	0.230594	0.0766047	0
455	SVE_0190900	0.199035	0.195905	0.125682	0.183578	0	0	0.127324	0.186284	0	0.22873	0.0742286	0.0735362
456	SVE_0191000	0.322868	0.379836	0	0	0	0	0.127646	0.250978	0.157351	0.0769357	0.0746276	0.219819
457	SVE_0193800	0	0.0664614	0	0	0	0	0.0664585	0.0646532	0.155366	0.075596	0.0695914	0
458	SVE_0194200	0.131699	0.322203	0.123096	0.120698	0.276854	0.269967	0.190147	0.0624319	0	0.0770055	0	0
459	SVE_0194700	0.064776	0.256754	0	0	0.560428	0.453845	0.0636545	0	0.0762429	0.148816	0	0.137587
460	SVE_0195100	0.0658389	0.12908	0.370731	0.423369	0	0	0.253811	0.12481	0.313921	0.307672	0.150986	0.0750443
461	SVE_0195200	0	0	0	0	0	0	0.445533	0.269096	0.157834	0.0771862	0	0.29678
462	SVE_0195300	0.25954	0.257186	0.318451	0.626193	0.280686	0.272766	0.255047	0.0619847	0	0	0.0697035	0.0689087
463	SVE_0196600	0.13188	0	0	0	0	0	0	0	0	0.0758234	0	0
464	SVE_0196700	0	0	0.0616253	0.180933	0	0	0.0636466	0.0626493	0.0790114	0.154671	0.0758291	0.075372
465	SVE_0197100	0	0	0	0	0	0	0	0.0641989	0	0	0	0
466	SVE_0197200	0.195437	0.063749	0	0	0	0	0	0	0	0	0	0
467	SVE_0197300	0.065233	0.0646939	0	0	0	0	0	0.0631799	0	0	0	0
468	SVE_0197400	0	0	0	0	0	0	0.0654972	0	0	0	0	0
469	SVE_0197500	0	0	0.0611465	0	0.0914736	0.089112	0	0.0607956	0	0	0.0732859	0
470	SVE_0198900	0.129017	0.316653	0.0626546	0.0610486	0	0.0900664	0	0	0	0	0	0
471	SVE_0199700	0	0	0	0	0	0	0.191025	0.250462	0.0789057	0.154346	0	0.148345
472	SVE_0199800	0	0	0	0	0.0876155	0	0	0	0	0	0	0
473	SVE_0199900	0.0642622	0	0.330262	0.323582	0	0.0905467	0.192668	0.124392	0	0	0.067895	0
474	SVE_0200400	0	0.0637995	0.311156	0.608783	0.265479	0.691447	0	0	0	0	0	0.145743
475	SVE_0201300	0	0.0649789	0	0.0609348	0	0.547454	0.379462	0.061819	0.231033	0.37941	0.51501	0.365167
476	SVE_0201600	0.254958	0	0	0	0.63034	1.31139	0	0	0.15081	0	0.145046	0.0719906
477	SVE_0202100	0	0	0	0	0	0	0	0	0	0	0.0724233	0
478	SVE_0202300	0.1332	0.260833	0.435676	0.365473	0	0	0.128562	0	0	0.0781063	0	0
479	SVE_0203100	0.0670089	0.190916	0.125544	0	0.0895174	0.52588	0	0	0	0.0772424	0	0
480	SVE_0203200	0.127787	0.0636877	0	0.256475	0.0935894	0.180285	0.0639009	0	0.0754358	0	0	0.0670218
481	SVE_0203500	0.0647658	0.0635051	0	0	0.182097	0.0886976	0.0312337	0.30693	0.154369	0.151252	0.148501	0.147538
482	SVE_0203800	0.131793	0.064604	0.186403	0.121579	0	0.176028	0.195379	0	0	0	0	0
483	SVE_0204200	0.0710104	0.0726482	0	0.0672372	0.202973	0.0990564	0.0715761	0.142066	0.0871944	0	0	0
484	SVE_0205900	0.064542	0.0632275	0	0	0	0	0.444308	0.062455	0.0786428	0.153798	0.150203	0.14756
485	SVE_0206000	0	0	0	0	0	0	0.0654971	0	0	0	0	0
486	SVE_0206100	0	0	0	0	0	0	0.0631959	0	0	0.0766912	0.0750991	0
487	SVE_0206200	0.130236	0	0	0	0.179253	0.087706	0.0638723	0.125701	0	0	0	0
488	SVE_0206400	0	0.0637157	0	0	0	0	0	0	0	0	0	0
489	SVE_0206500	0	0	0	0	0	0	0	0	0.0783361	0	0	0
490	SVE_0206600	0	0	0	0	0	0	0	0	0	0	0	0
491	SVE_0206700	0	0	0	0	0	0	0	0	0.0783361	0	0	0
492	SVE_0206800	0	0.0654785	0	0	0	0	0.191727	0.0632409	0	0.0762817	0.0729507	0.0720169
493	SVE_0206900	0	0.063716	0	0	0	0	0	0	0	0	0	0
494	SVE_0207000	0.0661407	0	0	0	0	0	0.0649007	0.0638502	0	0	0	0
495	SVE_0207100	0.325797	0.127512	0	0	0	0.175617	0.12759	0	0	0	0	0
496	SVE_0207200	0	0	0	0	0	0	0	0	0	0	0.144837	0.0712318
497	SVE_0207300	0	0	0	0	0	0	0	0.064199	0	0	0	0
498	SVE_0207400	0	0.0630428	0	0	0	0.0864912	0	0	0	0.0766693	0	0
499	SVE_0207500	0	0	0	0	0	0	0.065067	0.127305	0.159068	0	0	0
500	SVE_0207600	0.132328	0.065308	0	0	0	0	0.190424	0.0623675	0	0.0760809	0.0730467	0.0727534
501	SVE_0208000	0.0652106	0.191554	0.122097	0.0597864	0.549282	0.267592	0	0.0617875	0	0.0762001	0	0.0742588
502	SVE_0208200	0.0659955	0	0.0623793	0.182515	0.0933731	0	0.0634063	0	0	0	0	0
503	SVE_0209500	0	0.0652584	0	0	0	0	0.191621	0.124733	0.0780203	0.0766652	0.225129	0
504	SVE_0210300	0	0	0	0	0	0	0.12763	0.06261	0	0	0	0.0749972
505	SVE_0210500	0.326956	0.383937	0.0630267	0.0616522	0	0	0.391881	0.256356	0.394897	0.386495	0	0
506	SVE_0213100	0.131385	0.193983	0.12481	0.121274	0.278753	0.0907962	0.440541	0.553651	0.459808	0.075511	0.219639	0.0726763
507	SVE_0213200	0.198235	0.0651193	0	0	0	0	0.063249	0	0	0.2274	0.0732804	0
508	SVE_0213400	0.12851	0.0631175	0	0	0	0	0	0	0	0	0	0.0729446
509	SVE_0213500	0	0.0636083	0	0	0.0905735	0	0.187899	0.426802	0.195051	0.23117	0.522716	0.481525
510	SVE_0213600	0	0.064742	0	0	0	0	0.380772	0.62812	0.663822	0.30459	0	0.560122
511	SVE_0215200	0.0672437	0	0	0	0	0	0.129043	0.126362	0	0	0	0
512	SVE_0215300	0.192948	0.315038	0	0	0.0893138	0	0	0.184632	0.155449	0.15237	0.372965	0.147413
513	SVE_0215700	0	0.226446	0	0	0	0.0933148	0.131726	0.23518	0	0.0749184	0.137935	0.0413369
514	SVE_0215800	0.066587	0.261872	0	0	0	0	0.0639544	0.25242	0.233481	0.152347	0.218718	0
515	SVE_0216000	0	0	0	0	0	0.177953	0.0626707	0.246539	0.15493	0.227922	0.149148	0.222224
516	SVE_0216100	0	0	0	0	0	0	0.128032	0.125411	0.235092	0.231026	0.075583	0
517	SVE_0216200	0	0.0632681	0	0	0	0	0.191708	0.188415	0.392733	0.23046	0.148638	0.218946
518	SVE_0216300	0.0648506	0.13302	0	0	0.175715	0.0858004	0.284939	0.521667	0.0784377	0.0767583	0.513659	0.0758274
519	SVE_0216400	0	0	0	0	0	0	0.0647218	0.0635511	0	0.0784235	0	0
520	SVE_0216500	0	0	0	0	0	0	0.0640795	0	0.0791765	0.155155	0	0
521	SVE_0216600	0	0	0	0	0	0	0.0648274	0.0639201	0	0	0	0.07228
522	SVE_0216700	0.0659854	0.19616	0.259081	0.127362	0	0	0.259372	0.252143	0	0.0757976	0.141771	0.0700773
523	SVE_0216800	0	0.0660638	0.0618388	0	0	0	0	0.0638405	0	0.0800324	0	0.0757986
524	SVE_0217500	0.105725	0.114894	0.0607666	0.133312	0.251364	0.349193	0.191672	0.248743	0.176097	0.101773	0.27268	0.185236
525	SVE_0218900	0	0	0	0	0	0	0	0	0	0	0	0
526	SVE_0219400	0.130978	0.192652	0.549287	0.896637	0.0911133	0.267468	0.0635438	0.062474	0	0	0	0.0748958
527	SVE_0221300	0.196544	0.256019	0.308047	0.72221	0.27741	0.269697	0.188372	0.122971	0	0.0756392	0.148528	0.147166
528	SVE_0221600	0.0643987	0.126277	0	0	0.368424	0.270223	0	0	0	0	0.0695874	0.0685378
529	SVE_0221700	0	0.0639281	0	0	0.0921106	0	0	0.0609038	0	0	0	0
530	SVE_0222600	0.196791	0.128596	0.123115	0.180727	0.359728	0.790815	0.194029	0.0635911	0.0799777	0	0	0
531	SVE_0223300	0.127685	0.126629	0.130549	0.25485	0.374284	0.629037	0.0634725	0.123666	0	0	0	0.066895
532	SVE_0223400	0.454771	0.508619	0	0	0	0	0.32438	0.318311	0	0.0768108	0.219754	0.143995
533	SVE_0223600	0	0.126096	0.0644468	0	0.0925174	0.267981	0	0.0989983	0	0.0726613	0	0
534	SVE_0223700	0.0669319	0	0.127014	0.061862	0	0	0.0642923	0	0	0	0	0
535	SVE_0224000	0.327436	0.0645806	0.210158	0.0662359	0	0.0914543	0.0647388	0.0629067	0	0.0749931	0.0756742	0.0756899
536	SVE_0224500	0.064114	0	0.0616572	0.239979	0.0914006	0.17867	0	0	0	0	0	0
537	SVE_0226900	0.131227	0	0.626846	0.852044	0.186233	0.182175	0.125767	0.0615155	0	0.0752035	0.145076	0.0721948
538	SVE_0227100	0.19217	0.12614	0.246993	0.361077	0.550411	0.806623	0	0	0	0	0	0
539	SVE_0227300	0	0	0	0	0	0	0	0.0632379	0	0.0767298	0.0735049	0
540	SVE_0227400	0	0	0	0	0	0	0.1999	0	0	0	0.0711922	0
541	SVE_0227500	0	0	0	0	0	0	0.0651315	0.0639865	0	0.0766823	0	0.0718886
542	SVE_0227600	0.0648042	0.127122	0	0	0	0.265663	0.187831	0.246685	0.155427	0	0.0746752	0.148057
543	SVE_0228200	0	0.065126	0.0627623	0.0612524	0	0	0	0.124749	0.0780154	0.0766485	0	0.074303
544	SVE_0228300	0	0	0	0	0	0	0	0	0	0	0	0
545	SVE_0228400	0.064565	0.253188	0	0	0.0882557	0	0	0.188219	0.314641	0	0	0.146503
546	SVE_0228600	0	0	0	0	0	0	0	0	0	0	0	0
547	SVE_0228700	0.261692	0.319831	0.492444	0.30083	0.461839	0.179772	0	0.122922	0.0767958	0	0.0741829	0
548	SVE_0229300	0.0654945	0	0	0	0	0	0	0.0621066	0.0779603	0.153006	0.0750997	0
549	SVE_0229400	0	0	0	0	0.0446474	0	0	0.0610211	0	0	0	0
550	SVE_0231100	0	0	0	0	0	0	0	0.0617451	0.0777488	0	0.0742298	0.145668
551	SVE_0231200	0	0	0	0	0	0	0	0	0.156672	0	0	0
552	SVE_0231300	0	0	0	0	0	0	0.065591	0.128214	0	0	0	0
553	SVE_0231500	0	0	0	0	0	0	0	0	0.078336	0	0	0
554	SVE_0231800	0.583082	0.697981	0	0	0.0894724	0	0.12675	0.124895	0.0787276	0.154085	0.0755158	0
555	SVE_0233700	0	0.321135	0.127031	0.124566	0.280586	0.182459	0.569929	0.123868	0	0.148669	0.210619	0
556	SVE_0234000	0.183969	0	0	0	0	0	0.970764	0.384102	0.0866344	0.250147	0.347536	0.344925
557	SVE_0234100	0	0	0	0	0	0	0.44199	0.435295	0.784016	0.689317	0.150062	0.36882
558	SVE_0234200	0	0.0638709	0	0	0	0	0.251731	0.681572	0.468705	0.153073	0.224987	0.223487
559	SVE_0234300	0	0	0	0	0	0	0.692147	0.433794	0.234621	0.305819	0.150176	0.149129
560	SVE_0234400	0	0.0651534	0	0	0	0	0.255152	0.624015	0.233912	0	0.225665	0
561	SVE_0234500	0	0.0637951	0	0	0	0	0.187668	0	0.0772587	0	0.0742493	0.0737277
562	SVE_0235000	0	0	0	0	0	0.0851681	0	0	0.0778619	0	0.0728275	0.111713
563	SVE_0235200	0	0	0	0	0	0	0	0	0	0	0	0
564	SVE_0235300	0.2626	0.578872	0.368354	0.540288	0.089541	0	0.129071	0	0.0799722	0.0782164	0	0
565	SVE_0235400	0	0	0.0630187	0.0617732	0	0	0.064874	0	0.0804516	0	0	0
566	SVE_0235800	0.065981	0.0648731	0	0	0	0.273648	0.063103	0.185398	0	0.0753922	0	0
567	SVE_0235900	0	0.0653605	0	0	0	0	0	0	2.95803e-06	0.0730705	0.14393	0
568	SVE_0236000	0.065594	0.194391	0.544525	0.957845	0.725843	0.266754	0.0664887	0	0.0796337	0	0	0
569	SVE_0236200	0	0.126956	0	0.122145	0.0925195	0.0907829	0.124742	0	0	0.221121	0	0
570	SVE_0236500	0.260864	0.381885	0.132093	0.118779	0.0894708	0.0874938	0.389076	0.513919	0.079123	0.389934	0.0773919	0.148922
571	SVE_0236600	0	0	0	0	0	0	0	0.134763	0	0	0.0723886	0
572	SVE_0236700	0.0740276	0.191717	0.0622753	0.0609218	0	0.089547	0.129733	0.0637043	0.0791191	0.096758	0	0.219175
573	SVE_0236800	0.26335	0.193696	0.559999	0.485801	0.279446	0	0.0631601	0.123675	0.0773439	0.0759887	0.149129	0.0736634
574	SVE_0236900	0	0.261459	0.125787	0.183898	0	0	0	0.0623681	0	0	0.224016	0
575	SVE_0237600	0.391853	0.127874	0.0610674	0.0597278	0.0913018	0.445974	0.503127	0.186006	0.0781577	0.0764597	0.150043	0.149113
576	SVE_0237800	0	0	0	0	0	0	0	0	0	0	0	0
577	SVE_0238000	0.0652257	0	0	0	0	0	0	0.0632496	0	0.0778066	0	0
578	SVE_0238100	0	0	0.0610246	0.0597125	0	0	0.513241	0.441956	0.397572	0.466395	0.0759845	0.149339
579	SVE_0238700	0.0647028	0.253693	0	0	0	0	0	0.0628107	0	0	0	0.0736967
580	SVE_0238900	0.193828	0.189714	0	0	0	0	0.253422	0.249405	0.157168	0.0768485	0.300837	0.295839
581	SVE_0239100	0.129799	0.0635611	0	0	0	0	0	0.126722	0	0	0	0.0726646
582	SVE_0239200	0.121351	0.190162	0	0	0.195451	0.272438	0.0833396	0.0758253	0.104637	0.287921	0.147523	0.217398
583	SVE_0239300	0.257622	0	0	0	0.186243	0.179888	0.0636694	0	0.0760705	0.147509	0	0
584	SVE_0239800	0.13177	0.193788	0.306906	0.240671	0.733914	0.269503	0.127625	0.125717	0	0	0	0
585	SVE_0241700	0.263576	0.323055	0.0611926	0.240113	0.64217	0.450187	0	0	0	0.0776564	0	0
586	SVE_0241900	0	0	0	0	0	0	0	0.0622915	0.0778494	0	0.0751287	0
587	SVE_0242200	0.131479	0.0645189	0	0.121121	0.186065	0	0	0.123319	0	0.0757964	0	0
588	SVE_0242300	0.0654688	0.0642129	0.122418	0	0	0.0894621	0.0632527	0.0623037	0	0	0	0.0747877
589	SVE_0242800	0.320314	0.320033	0	0	0.281107	0.631862	0.0640234	0.124006	0	0.0731597	0	0
590	SVE_0243000	0.0656839	0.193953	0.124429	0.121165	0.185578	0.0907727	0.315138	0.245903	0.229894	0.603869	0.146978	0.0728034
591	SVE_0243700	0.195079	0.318972	0	0	0.0920198	0.179873	0.0624756	0.183193	0.152595	0	0.0731935	0.217787
592	SVE_0243800	0	0	0.181952	0.0593548	0	0	0	0	0	0.0773675	0.227092	0.0744413
593	SVE_0243900	0.0636116	0	0	0	0.0897841	0	0	0	0	0	0	0
594	SVE_0244300	0.130576	0.255946	0.793772	0.477972	0.179621	0.0877207	0.32096	0	0	0	0.076028	0
595	SVE_0245200	0.257718	0.126619	0.18223	0	0.091006	0	0	0	0	0	0	0.0731971
596	SVE_0246200	0.51545	0.44207	0	0	0.617299	0.344585	0	0.125079	0.0785646	0.153623	0	0.146695
597	SVE_0246400	0.196903	0.192629	0	0	0	0	0.321338	0.189935	0.159581	0	0	0
598	SVE_0246500	0	0.0640355	0.365585	0.417952	0	0	0	0.0629367	0	0	0.152266	0.0750151
599	SVE_0247100	0.130517	0.139506	0.0619661	0.121243	0	0.260533	0	0.127167	0.0792894	0	0	0.0734804
600	SVE_0247300	0.130657	0.192025	0.186115	0.0606921	0.444981	0.521599	0.129574	0.190962	0	0	0	0.147103
601	SVE_0247400	0.0650062	0.127483	0.244693	0.2394	0.533757	0.521491	0	0	0.0792711	0	0.150635	0
602	SVE_0247500	0.129238	0.412902	0	0	0.0880295	0.0859891	0	0.125925	0.0785094	0	0.148143	0
603	SVE_0247600	0.129787	0.348401	0	0	0	0	0	0	0	0.154381	0	0
604	SVE_0248600	0	0.129441	0	0	0	0	0.129723	0.0638253	0	0	0	0
605	SVE_0248700	0	0	0.0636769	0.186535	0	0	0	0	0	0	0	0
606	SVE_0248800	0	0	0	0	0	0	0	0.064199	0	0	0	0
607	SVE_0248900	0	0	0	0	0	0	0.129055	0.0638529	0.0786124	0	0.0736568	0
608	SVE_0249000	0.45916	0.450064	0.246333	0.24081	0	0.0896988	0.505129	0.310561	0.0780073	0.153115	0.300625	0.0746084
609	SVE_0249300	0	0	0	0	0.442922	0.521109	0	0.0613408	0	0.151858	0	0.0734079
610	SVE_0249500	0	0	0.188567	0.123149	0	0	0.194025	0.0636184	0.08014	0.0784169	0	0
611	SVE_0249700	0	0	0	0	0	0	0.0658736	0	0.0785699	0.0760421	0	0
612	SVE_0249800	0	0.381734	0.0607095	0.17816	0.626206	0.699119	0.0638205	0.376613	0.079125	0.0773919	0.30262	0.148793
613	SVE_0250100	0.13342	0	0	0	0	0	0.0663235	0	0.0788446	0	0.141543	0.0698997
614	SVE_0250300	0	0.190656	0	0	0	0	0.514859	0.505815	0.0787836	0.154131	0.297121	0
615	SVE_0250400	0	0	0	0	0	0.0903792	0.0620171	0	0	0	0	0
616	SVE_0250500	0	0	0	0	0	0	0.193752	0.127114	0.240763	0	0	0
617	SVE_0250900	0.127707	0.0625336	0	0	0.177042	0	0	0	0	0	0	0.146689
618	SVE_0251000	0	0.127314	0.0624722	0	0	0	0.880397	0.700197	0.314602	0.0843301	0.166237	0.471778
619	SVE_0251100	0	0	0.0611406	0	0.352255	0.294766	0	0.144656	0.392601	0.230392	0.342654	0.138214
620	SVE_0251200	0	0	0.0656897	0	0	0	0.00193843	0	0	8.57988e-07	0	0.0596852
621	SVE_0251400	0	0	0	0	0	0	0.132999	0.322563	0.317267	0.0767651	0.213281	0.0702011
622	SVE_0253200	0	0	0	0.0610958	0.175909	0.0858925	0.129611	0.318018	0.157064	0.153708	0.0734053	0.360709
623	SVE_0253400	0	0	0	0	0.087435	0	0	0.06201	0.0778893	0	0.14811	0.218139
624	SVE_0253500	0	0.0636298	0	0	0.265268	0.172742	0.193355	0.189952	0.0788696	0.0771513	0	0
625	SVE_0253800	0.12644	0	0	0	0	0	0.167362	0.081621	0.146995	0.231192	0	0
626	SVE_0253900	0.072588	0.127135	1.91982e-08	0	0.088296	0.394448	0.217154	0.405271	0.0885367	0	0.0833341	0.13673
627	SVE_0254000	0	0.127071	0.0619387	0	0.264436	0.0860921	0.417482	0.126692	0.393259	0.281567	0.221716	0.0889664
628	SVE_0254100	0	0.062966	0	0	0.0885703	0.0867456	0.441081	0.310224	0.078227	0.229376	0.149762	0.147234
629	SVE_0254200	0.0648399	0.254109	0	0.12053	0.0883109	0.086263	0.385898	0.505512	0.0787635	0.231135	0.0742859	0.218895
630	SVE_0254500	0	0	0	0	0	0	0.50841	0.186486	0.2333	0.763953	0.374925	0.296594
631	SVE_0254600	0.264168	0.130082	0.0617066	0.300276	0.273729	0.187902	0.129129	0.133146	0	0.0782256	0	0
632	SVE_0255300	0.266695	0.0652931	0.125344	0.122535	0	0	0	0.0627106	0	0.0772871	0	0
633	SVE_0255400	0.651528	0.382379	0.252447	0.510672	0.0879011	0	0.0652314	0.127961	0.235612	0.230643	0.073011	0.0717798
634	SVE_0255500	0.195461	0.0638559	0.863194	0.361921	0	0	0.516038	0.44377	0.0792701	0.0775285	0.07499	0.0736421
635	SVE_0255700	0	0	0	0	0	0.272864	0.125901	0	0.0767033	0	0	0
636	SVE_0256900	0	0	0	0	0	0	0.188789	0	0	0.0765701	0	0.0742963
637	SVE_0257000	0	0.0627848	0	0	0	0	0	0.124303	0.156261	0	0.148673	0.0729717
638	SVE_0257100	0	0	0	0	0	0	0.0628615	0	0	0.0764241	0	0.074522
639	SVE_0257200	0	0	0	0	0	0	0	0	0	0.0767056	0	0
640	SVE_0257300	0	0	0.0648348	0.063669	0	0	0	0.0630872	0	0	0	0.0695414
641	SVE_0257400	0	0.0629416	0	0	0	0	0	0	0.0769407	0.150538	0.0738534	0.0733958
642	SVE_0257500	0	0	0	0.0622303	0	0	0	0	0	0	0	0
643	SVE_0257600	0	0	0.0636237	0	0	0	0	0	0	0	0	0
644	SVE_0257700	0.0651844	0.127822	0	0	0	0	0.0643561	0	0.079483	0	0	0
645	SVE_0257800	0	0.0650103	0.372937	0.426099	0	0.0908162	0.0639491	0.0629088	0	0.0775829	0	0
646	SVE_0258000	0.132192	0.262259	0	0	0	0	0.195443	0.127138	0.0782261	0.0760044	0	0.140146
647	SVE_0258100	0.132559	0.130706	0	0	0	0	0.127007	0.187167	0.0773764	0	0.0730608	0.145618
648	SVE_0258300	0	0.191135	0	0	0.185718	0.0904272	0	0	0	0.0736593	0.209513	0.137669
649	SVE_0258400	0.198114	0.325212	0	0	0	0.366603	0.126508	0.123931	0.153996	0.0757258	0	0
650	SVE_0258500	0.259606	0.381257	0	0	0.0880343	0.171954	0.323177	0.190371	0.0785772	0.0768875	0.0736469	0
651	SVE_0258600	0.130555	0.576903	0	0	0	0.091457	0.062571	0	0.0762303	0	0	0
652	SVE_0258700	0	0	0	0	0	0	0.253887	0.312458	0.0787865	0	0	0.0751336
653	SVE_0258800	0	0.0667452	0	0	0.263433	0.257263	0.0646193	0.063428	0.0826497	0	0.0733463	0.0753569
654	SVE_0259600	0.0653652	0.128458	0.0616257	0.120308	0.0923279	0.0897224	0.0629632	0.123913	0.233374	0	0	0.148521
655	SVE_0261600	0.0642845	0	0	0	0.265778	0.347206	0.188671	0.123968	0	0	0.0748165	0.147215
656	SVE_0261700	0	0	0	0.0597777	0.275007	0.4454	0.0626518	0	0	0	0	0
657	SVE_0262200	0.446794	0.1266	0.391557	0.254791	0.748397	0.359368	0	0	0	0	0.067714	0.133759
658	SVE_0262800	0	0.127599	0	0	0.362758	0.266439	0.0630519	0.12428	0.0783534	0.0765913	0	0
659	SVE_0263100	0.260103	0.127474	0	0	0	0	0.192232	0.0630273	0	0	0.0755991	0
660	SVE_0263600	0	0	0	0.0641793	0	0	0	0	0	0	0.0752297	0
661	SVE_0263700	0	0	0.127008	0.124367	0	0	0	0.193104	0	0	0	0
662	SVE_0263800	0	0	0	0	0	0	0.0654135	0.0642811	0	0	0	0
663	SVE_0264100	0	0	0	0	0	0	0	0	0.0783357	0	0	0
664	SVE_0264200	0	0.0642805	0	0.0621698	0	0.273702	0.0631352	0.186114	0	0	0	0
665	SVE_0264300	0	0	0	0	0	0	0	0	0	0	0	0
666	SVE_0266600	0.195641	0.127831	0.121487	0.178491	0.272223	0.443968	0.0632433	0.0621686	0.0784846	0.153889	0.0752487	0.0745292
667	SVE_0266700	0.0660327	0	0.0636529	0.124071	0.18913	0	0.0632881	0.0624989	0.0771195	0.15114	0.0725027	0.0717571
668	SVE_0268500	0.256429	0.125532	0	0	0.270117	0.0877457	0.185311	0	0	0	0.146954	0.219036
669	SVE_0268600	0.0643184	0	0	0	0	0	0	0.0626263	0	0	0.0738773	0.0725556
670	SVE_0269100	0.193538	0.315996	0	0	0	0	0	0	0.0783217	0	0.147579	0
671	SVE_0269400	0.518552	0.254219	0.244143	0	0.3547	0.693087	0.256077	0.188837	0	0	0.0750437	0.0736763
672	SVE_0269500	0	0	0.0633518	0.0616155	0.0933424	0.0915904	0	0.0620139	0	0.0743627	0.141028	0.0697361
673	SVE_0270200	0.0658734	0	0	0	0	0	0.0655097	0.0638564	0.0779139	0	0	0
674	SVE_0270400	0	0	0	0	0.121579	0.429947	0.0645729	0.317008	0	0	0	0.0724246
675	SVE_0270500	0	0	0	0	0	0	0.0647818	0	0	0	0	0
676	SVE_0271100	0	0	0	0	0	0	0	0	0	0	0	0
677	SVE_0271200	0	0	0	0	0.0930038	0	0	0	0.0759314	0.0745992	0	0
678	SVE_0271300	0	0	0	0	0	0	0	0	0	0	0	0
679	SVE_0271400	0	0	0	0	0	0	0	0.077702	0	0.026178	0	0
680	SVE_0271500	0.130582	0.0640202	0	0	0	0.117917	0.233107	0.247536	0	0.0762391	0.0748527	0
681	SVE_0271600	0	0	0	0	0	0	0.253993	0.312248	0.392282	0.306795	0.373099	0.219783
682	SVE_0271900	0	0	0	0	0	0	0	0.12663	0	0.0777796	0	0
683	SVE_0272000	0	0	0	0	0	0	0	0	0	0.0767063	0	0
684	SVE_0272100	0.190158	0.125585	0.0633878	0	0.369002	0.267596	0	0	0.0748579	0	0	0
685	SVE_0272200	0.132459	0.12962	0.185188	0.0604155	0	0	0	0	0.0805167	0	0	0
686	SVE_0272300	0	0.127765	0	0	0	0	0	0.189418	0.0794475	0	0	0
687	SVE_0273100	0.0657529	0.12875	0.49058	0.540075	0	0	0	0	0	0	0.0765478	0
688	SVE_0276800	0	0	0	0	0	0	0.0642959	0	0.159609	0	0	0
689	SVE_0276900	0	0	0	0	0	0	0	0	0	0.0749218	0	0.07293
690	SVE_0277100	0	0	0	0	0	0	0	0	0	0	0	0
691	SVE_0277200	0	0	0	0	0	0	0	0	0	0	0	0.071227
692	SVE_0277300	0.195221	0	0	0	0	0	0.0640871	0.0630339	0	0	0	0.148585
693	SVE_0277400	0.130615	0	0	0	0	0	0.0643818	0	0	0.140909	0	0
694	SVE_0277500	0	0	0	0	0	0	0.0654972	0	0	0	0	0
695	SVE_0277600	0.261649	0	0	0	0	0	0.0630038	0.185936	0.0780492	0.152872	0.29989	0.223466
696	SVE_0277700	0.132968	0	0	0	0	0	0	0.0629435	0	0	0	0
697	SVE_0277800	0.0657806	0	0	0	0	0	0.0632766	0.124708	0.157257	0	0	0.07501
698	SVE_0277900	0	0	0	0	0	0	0	0.0641989	0	0	0	0
699	SVE_0278000	0	0	0	0	0	0	0	0.123387	0	0	0	0.148278
700	SVE_0278100	0	0	0.0605351	0	0	0.0881718	0	0	0	0	0.0738769	0
701	SVE_0278200	0.0662772	0.0651566	0	0	0	0	0	6.01684e-10	0	0.150659	0	0
702	SVE_0278300	0.128708	0	0	0	0.0893535	0.174935	0.125306	0.123134	0.31124	0	0.149314	0.0738176
703	SVE_0278400	0.198745	0.0651282	0	0	0	0	0.127936	0	0.154446	0	0	0
704	SVE_0278600	0.0661739	0	0	0	0	0	0	0	0.0771615	0	0	0
705	SVE_0278700	0	0	0	0	0	0	0	0	0.0781092	0.0769284	0	0
706	SVE_0278800	0.0666705	0	0	0	0	0	0.127661	0.125184	0.233187	0.152642	0.0734943	0.146423
707	SVE_0279500	0.065099	0.0645611	0	0	0	0	0.064722	0	0	0	0	0
708	SVE_0279900	0	0	0	0	0	0	0	0	0	0	0	0
709	SVE_0280100	0	0	0	0.074879	0	0	0	0	0	0	0	0
710	SVE_0280200	0	0	0.061948	0.12084	0.0927375	0	0	0	0	0	0	0
711	SVE_0280300	0.196346	0.0641539	0	0	0	0	0	0.0634998	0	0	0	0
712	SVE_0280700	0	0	0.0630774	0.0617637	0	0	0	0.0652475	0	0	0	0
713	SVE_0282400	0.193961	0.316709	0	0	0.440173	0.343969	0.256591	0.315102	0	0.230427	0.296111	0.145427
714	SVE_0283000	0	0	0	0	0	0	0	0	0	0	0	0
715	SVE_0283200	0.130811	0	0.122001	0.0596963	0.180028	0.0880732	0.128337	0.0631216	0	0.0778109	0	0.0748996
716	SVE_0283400	0.324333	0.0635737	0	0	0.090479	0	0.125477	0.308869	0.389226	0.0762761	0.149408	0.148262
717	SVE_0284600	0.131104	0.129915	0	0	0	0	0	0.125244	0	0	0	0
718	SVE_0284800	0.0648889	0.254131	0	0	0	0	0.193829	0.317169	0	0	0.0736692	0.0723871
719	SVE_0286600	0	0	0.13073	0.0640358	0	0	0	0	0.0771929	0	0	0.0684114
720	SVE_0286800	0.131042	0.192631	0.0612839	0.119922	0.180289	0.264069	0	0.0633824	0.0798394	0	0	0
721	SVE_0287000	0.45358	0.31747	0	0.0594324	0.0888804	0	0.319074	0.376598	0.0789778	0.0772116	0.150728	0.221931
722	SVE_0287600	0	0.255439	0.185493	0.24196	0.621768	0.520601	0.32301	0.126955	0.0792109	0.0774783	0.149575	0
723	SVE_0287700	0	0	0	0.0630518	0	0	0.0645204	0.0636529	0	0.0775194	0	0
724	SVE_0288200	0.416244	0.1916	0.122088	0.119463	0.357734	0.262082	0	0.126178	0	0.0776591	0.075846	0
725	SVE_0289700	0.130301	0.191371	0.0609284	0	0	0	0	0	0	0	0	0.0743706
726	SVE_0290800	0	0.324145	0	0	0	0.183573	0.521042	0.251849	0.0763876	0.222038	0	0
727	SVE_0290900	0.195972	0.12844	0.127119	0	0.280796	0.546886	0.378452	0.247917	0	0.222739	0.422365	0
728	SVE_0291000	0.0652681	0	0	0	0.283584	0.366973	0.128663	0.564955	0.308985	0.0750522	0.0698	0.27678
729	SVE_0291100	0	0.0631417	0	0	0	0	0.126715	0.249171	0.0785024	0.15354	0.150118	0.0737672
730	SVE_0291200	0.0643439	0	0	0	0	0.0865259	0.569514	0.559943	0.313623	0.230026	0.299865	0.515736
731	SVE_0291300	0	0.442541	0	0	0.0888032	0.218967	0.0634364	0.187111	0.235801	0.153731	0.300609	0
732	SVE_0291400	0	0	0	0	0.176702	0.517636	0.252263	0.496158	0.312639	0.229324	0.22423	0.220446
733	SVE_0291500	0	0	0	0	0	0	0.078262	0.0644187	0	0	0	0
734	SVE_0291600	0	0	0	0	0	0	0	0	0	0	0	0.0712271
735	SVE_0291700	0	0	0	0	0	0	0.255891	0.25245	0.156213	0	0.0735757	0.146522
736	SVE_0291800	0.520423	0.193433	0.525306	0.57546	0.283618	0.182796	0.192855	0.0628429	0.0766507	0.0739035	0.0686832	0.135637
737	SVE_0292100	0.326799	0.574316	0	0.0311132	0.369891	0.450321	0.125404	0.184167	0.153565	0.150875	0.210607	0.146258
738	SVE_0292200	0.130317	0.172746	0.309862	0.211219	0	0	0.129333	0.127054	0.0791154	0.206009	0.279423	0.0732336
739	SVE_0292300	0.128695	0.125996	0	0	1.15914	0.437101	0.0627401	0.123485	0	0	0.224442	0.147777
740	SVE_0292400	0	0	0	0	0	0	0	0.0619565	0	0	0.0750603	0
741	SVE_0292500	0	0.0623169	0	0	0	0.0878533	0	0	0	0	0	0.0709141
742	SVE_0292600	0	0	0	0	0	0	0	0	0	0	0	0
743	SVE_0292700	0.0650812	0.0636497	0	0	0	0	0.130441	0.383753	0.313565	0.076744	0.145545	0.214655
744	SVE_0292800	0.194721	0	0	0	0	0	0.128803	0.316348	0.157652	0.0771078	0	0.218974
745	SVE_0293000	0.0862229	0.223371	0.06187	0.060528	0	0	0.220422	0.0635249	0.158565	0	0.149733	0.147058
746	SVE_0293100	0.130736	0.127915	0	0.0596444	0	0	0.1276	0	0	0.0776533	0	0.0749585
747	SVE_0293200	0.0659611	0.254139	0	0	0.175603	0.22585	0.335483	0.214866	0.096925	0.298176	0.444615	0.143808
748	SVE_0293400	0	0	0	0	0	0	0	0	0.0783358	0	0	0
749	SVE_0293500	0	0	0	0	0	0	0.0650833	0.0636106	0.0795664	0	0	0
750	SVE_0293600	0	0	0	0	0	0	0	0	0	0	0	0
751	SVE_0293700	0.065282	0	0	0	0	0	0	0	0.0782653	0.229964	0	0
752	SVE_0293800	0	0	0	0	0.122396	0	0.0940364	0	0	0	0	0
753	SVE_0294100	0.589563	0.384684	0.246951	0.180855	0.184959	0.450447	0	0.0614596	0.0768098	0.075476	0	0.0732991
754	SVE_0294600	0.126762	0.125641	0	0.249187	0.0921095	0.267146	0	0.122456	0	0	0	0
755	SVE_0294800	0.130233	0.255709	0.126489	0.123247	0.27932	0.545491	0.125488	0	0.151566	0	0	0.20776
756	SVE_0295600	0	0.0981078	0.0849815	0	0	0	0.0641714	0.103121	0.205712	0.0777702	0	0
757	SVE_0295700	0	0.139924	0.0615078	0	0.0919287	0	0.191833	0.125977	0	0.0778047	0	0
758	SVE_0296000	0.262236	0.256697	0.428992	0.599488	0.183344	0	0	0.0622549	0	0	0	0.0748607
759	SVE_0296200	0.130521	0.191902	0	0	0	0.178484	0.0628198	0.123592	0	0.152335	0	0.0742286
760	SVE_0300900	0.0666657	0	0.125915	0.0614932	0	0	0	0	0	0	0	0
761	SVE_0301300	0.130498	0.255768	0.309144	0.423418	0.533899	0.782322	0.129281	0.0635219	0.0793437	0	0	0.220919
762	SVE_0301900	0.197895	0.131059	0	0	0	0	0.262181	0.127772	0	0	0.069902	0
763	SVE_0302700	0.131585	0.128906	0	0	0	0	0	0.188635	0	0	0	0
764	SVE_0304500	0.196003	0.192643	0.126709	0.123345	0	0.275055	0	0	0.0762286	0	0.0709382	0.0700781
765	SVE_0304600	0.262	0.0641886	0	0	0	0	0	0.0634162	0	0	0	0
766	SVE_0305000	0	0.0637156	0	0	0	0	0	0	0	0	0	0
767	SVE_0305100	0	0	0	0	0	0	0	0	0	0	0	0
768	SVE_0305400	0	0.06446	0	0	0	0	0.317026	0.250036	0	0.0770849	0.075635	0
769	SVE_0305500	0.191514	0	0.125522	0.123351	0.0922435	0.446935	0	0.061057	0	0	0	0
770	SVE_0306000	0.0658251	0	0.061323	0.120129	0	0	0	0.316547	0.0798924	0	0	0.151013
771	SVE_0306100	0.389284	0	0	0	0	0	0.257193	0.252726	0.236619	0.231439	0	0.219495
772	SVE_0307200	0	0	0	0	0	0	0	0	0.156672	0	0	0
773	SVE_0307300	0	0	0	0	0	0	0.0638363	0.0627931	0	0	0.304017	0
774	SVE_0307400	0.462449	0.646961	0	0	0	0	0.126666	0.186411	0.233753	0	0	0.0744308
775	SVE_0307500	0.130109	0.318282	0	0	0	0.0858818	0.325	0.170519	0	0.153763	0	0.0720013
776	SVE_0307600	0	0	0	0	0	0	0	0.0202938	0	0	0.0747789	0
777	SVE_0307900	0.129341	0.0642654	0.128781	0.189074	0	0.181925	0	0.0623959	0.0767639	0	0	0.206135
778	SVE_0308300	0	0	0	0.0590652	0.269745	0.0879735	0.188916	0	0	0.230095	0	0.148182
779	SVE_0313000	0.197969	0.0646525	0.0618885	0	0	0.0902086	0.0635387	0.312441	0.235613	0.154053	0	0
780	SVE_0313100	0.262207	0.129965	0	0	0	0	0.260759	0.127089	0.0775334	0	0	0
781	SVE_0314100	0.324229	0.256473	0.5073	0.311455	0.186374	0.18133	0	0.0617327	0	0	0.0695743	0.275091
782	SVE_0314600	0.0656022	0.192903	0.307899	0.180765	0.359719	0.87854	0.0646849	0.381598	0	0.0782504	0	0
783	SVE_0314700	0	0	0	0	0.262319	0.342826	0	0	0	0	0	0
784	SVE_0316000	0.0659973	0.0647476	0	0	0	0	0	0.0624025	0	0	0	0
785	SVE_0316100	0	0	0	0	0	0	0.0653187	0.0643745	0	0	0	0
786	SVE_0316300	0	0	0	0	0	0	0.317983	0.437693	0.235404	0.0767303	0.223472	0.219406
787	SVE_0316700	0.658833	0.387061	0.185034	0.120806	0	0	0.444202	0.0624249	0.157222	0.0769861	0.302049	0.0750248
788	SVE_0316900	0	0.0658763	0	0	0	0	0.195985	0.127015	0.156496	0.076365	0.0714162	0
789	SVE_0317000	0.330066	0.195845	0	0	0	0	0.0654014	0	0	0	0.0699193	0
790	SVE_0317200	0	0	0	0	0	0	0.0639277	0.134383	0.244304	0.306886	0.163302	0.074283
791	SVE_0317400	0	0.125909	0	0	0.0881253	0.0860704	0	0	0	0	0	0
792	SVE_0317800	0	0.189823	0	0.0627701	0.186036	0.0898694	0	0.123258	0	0	0	0.0666095
793	SVE_0317900	0.130123	0.241754	0.0324157	0.031765	0.14164	0	0.0322291	0.0312661	0	0.0372042	0	0.068046
794	SVE_0318000	0.330498	0.192597	0.0613175	0.0599724	0.183351	0.0895598	0	0.0622536	0.156955	0.0767728	0	0
795	SVE_0318300	0	0	0	0	0	0	0	0	0	0	0	0
796	SVE_0318400	0	0	0	0	0	0	0	0.128398	0	0	0	0
797	SVE_0318500	0	0	0	0	0	0	0	0	0	0	0	0
798	SVE_0318600	0	0.0651068	0	0	0	0	0	0	0.0774168	0.0758487	0.0725366	0
799	SVE_0319000	0.261886	0.513429	0	0	0	0	0.257831	0.190171	0	0.0780316	0	0
800	SVE_0319200	0	0	0	0	0	0	0.0654971	0	0	0	0	0
801	SVE_0319300	0.0666193	0	0	0.062587	0	0	0.127701	0.189163	0	0	0	0.0723946
802	SVE_0319400	0.129031	0.126455	0	0	0	0	0.509177	0.688587	0.0786829	0.153919	0.149802	0.220571
803	SVE_0319700	0.198824	0.194609	0.312067	0.18288	0	0	0.0635165	0.0622161	0.0777523	0	0.149986	0.0743057
804	SVE_0320400	0.396078	0.194165	0.0615004	0.180855	0	0	0	0.125962	0	0	0	0.0754852
805	SVE_0320700	0.13049	0.0639086	0.0621582	0	0	0	0.259217	0.254612	0.158334	0	0.223529	0
806	SVE_0322800	0	0	0	0	0	0	0	0	0	0	0	0
807	SVE_0322900	0.0879337	0.191788	0	0.0595815	0.182126	0.178233	0	0.0619969	0	0.153015	0	0
808	SVE_0323700	0	0	0	0	0	0	0.130995	0	0	0	0	0
809	SVE_0323800	0.527194	0.194589	0	0	0	0.0910703	0.126469	0.308387	0.30753	0.0757311	0.14746	0
810	SVE_0323900	0	0	0	0	0	0	0	0	0	0	0	0
811	SVE_0324000	0.195436	0.191546	0.30535	0.298851	0.178672	0	0.256651	0.126212	0.0794056	0	0.151525	0.371761
812	SVE_0324200	0.0639023	0.12575	0	0	0.183121	0.178619	0	0	0	0.14554	0	0
813	SVE_0324300	0.393214	0.770929	0.371179	0.242094	0.358179	0.612367	0.0648044	0.0637041	0	0.0780545	0	0
814	SVE_0324400	0.042075	0.065309	0.0632688	0.0615954	0	0	0.19013	0	0	0	0.0729544	0
815	SVE_0324500	0.651114	0.382807	0.539711	0.362568	0.177492	0.346764	0.0645393	0.190249	0	0	0.0747266	0.146785
816	SVE_0324600	0.0652491	0.191851	0.0608265	0.178576	0	0	0	0	0	0	0.226361	0.0745515
817	SVE_0324900	0.263435	0.0648166	0.187152	0.243151	0.37244	0.547937	0.126411	0.123333	0.0770138	0.151497	0	0
818	SVE_0325000	0	0.138222	0.152566	0.122897	0	0	0.0652013	0.197422	0.0790575	0	0	0.231528
819	SVE_0327400	0.263999	0.129357	0	0	0	0	0.063729	0	0	0	0	0
820	SVE_0327600	0.0641409	0.0637388	0.191589	0.125017	0.186563	0.180434	0.127151	0.247539	0	0.147695	0	0
821	SVE_0328100	0.0646454	0.25319	0	0	0.537444	0.0878173	0.126116	0.0620844	0.23521	0.0767969	0.0752097	0
822	SVE_0328200	0.133114	0	0	0	0	0	0	0.188624	0	0	0	0
823	SVE_0328300	0.0636418	0.0624059	0	0	0.442716	0.346566	0	0	0	0	0	0.0727835
824	SVE_0328500	0.128412	0.0636108	0	0.124063	0.278326	0.179805	0	0.0614092	0	0.0737035	0	0
825	SVE_0328900	0.128756	0	0	0	0	0.172527	0.126794	0.0623504	0.156944	0	0.374513	0.073509
826	SVE_0329000	0	0	0	0	0	0	0.0661663	0.0643689	0.154682	0	0	0
827	SVE_0329100	0.323138	0.316713	0	0	0	0	0.127938	0.125744	0.157291	0.076916	0.148851	0.0730858
828	SVE_0329200	0.129074	0.189761	0	0	0.528543	0.258168	0	0.0627836	0.0785345	0	0.0743212	0
829	SVE_0329300	0.394	0.257445	0.124225	0.0607668	0	0	0.0649978	0	0.0799095	0.156305	0	0
830	SVE_0329400	0.193165	0.189339	0	0	0.176549	0.172498	0.190454	0.0624193	0.235511	0.153587	0.0748353	0.220389
831	SVE_0329800	0.194179	0.253878	0	0	0.810471	0	0	0.0617466	0.0779585	0.0764165	0.074776	0
832	SVE_0330100	0.130855	0.192336	0	0	0	0	0.259387	0	0	0	0	0
833	SVE_0330200	0	0.252848	0	0	0.179036	0.526475	0	0.123876	0.0781823	0.076657	0	0
834	SVE_0330300	0.323503	0.31662	0	0	0.26751	0.349255	0.0633026	0.499087	0	0	0	0.0740874
835	SVE_0330400	0.45594	0.57381	0.0606952	0.0594193	0.269487	0.175956	0	0.251221	0.0791618	0.0774028	0	0.223802
836	SVE_0330600	0	0	0	0	0	0	0	0	0	0	0	0
837	SVE_0332000	0.127719	0.191618	0.133132	0.324413	0.0944497	0.271474	0	0.12427	0	0	0.0668809	0.131752
838	SVE_0332200	0.194721	0.127065	0	0	0	0	0.129472	0.127077	0.156979	0.0768104	0.293591	0.0721326
839	SVE_0333100	0.0655758	0.0642063	0.244374	0.1796	0	0	0	0.126209	0.0796459	0.0779306	0.0763359	0
840	SVE_0333300	0.195847	0.127842	0	0	0	0	0.129965	0.0638033	0.0790703	0	0	0
841	SVE_0333400	0	0.0637326	0	0	0	0	0.162827	0.127107	0	0	0	0.0728081
842	SVE_0333500	0.390228	0.318466	0.0621121	0	0.530123	0.604066	0.323373	0.127025	0.15768	0.154271	0	0.0727672
843	SVE_0333600	0.387927	0.316598	0	0	0	0	0.0642805	0	0.0783877	0.153383	0.0736635	0.144741
844	SVE_0333700	0.323188	0.0633076	0	0	0	0	0.129482	0	0.0787131	0.0769782	0.0752569	0
845	SVE_0334300	0	0	0	0	0	0	0.130994	0	0	0	0	0
846	SVE_0335000	0.0653436	0.192829	0.185635	0.121074	0.0891411	0.174161	0.129428	0.190793	0	0	0	0.147601
847	SVE_0337200	0.12812	0.0633851	1.09512	0.565921	0.279542	0.54016	0.252612	0	0	0	0.0673869	0
848	SVE_0337800	0.0816734	0.0771	0	0	0	0	0	0.0632463	0	0.0298251	0	0
849	SVE_0337900	0	0	0	0	0.380002	0.211593	0.151299	0.0740098	0	0.20368	0	0.144598
850	SVE_0338000	0	0	0	0	0	0	0	0	0	0	0	0
851	SVE_0338400	0	0.128023	0.243712	0.119396	0	0	0.127728	0.159594	0.0794108	0.155458	0.0761946	0.150024
852	SVE_0339000	0	0.0772153	0.0740032	0	0	0	0.0673403	0.142983	0	0.189472	0	0.0812366
853	SVE_0339100	0	0	0	0	0	0	0	0.0641988	0	0	0	0
854	SVE_0339200	0	0	0	0	0	0.0924672	0.0639884	0.125753	0	0.0306059	0.077597	0
855	SVE_0339300	0.161409	0	0	0	0.226573	2.94971e-07	0.0636025	0.0626597	0	0.0772382	0	0
856	SVE_0339400	0.0645781	0	0	0	0	0	0.694578	0.311017	0.470785	0.460566	0.677344	0.22201
857	SVE_0339700	0.114125	0.128355	0.24842	0.0607582	0	0	0.194716	0.0637779	0	0.0778745	0.150399	0
858	SVE_0339900	0.267737	0.0765684	0	0.0875386	0.195989	0	0	0	0	0	0	0
859	SVE_0340300	0.131531	0.128844	0	0	0	0	0.0636766	0	0	0.232059	0	0
860	SVE_0340400	0	0	0	0	0	0	1.02737	0.567617	0.078427	0.306899	0.295205	0.289998
861	SVE_0340700	0	0	0	0.0602871	0	0.0883065	0	0	0	0	0	0
862	SVE_0340800	0.193962	0.126773	0	0	0.265692	0.173052	0.127588	0.0627461	0	0.154267	0.225146	0
863	SVE_0340900	0.259863	0.445689	0	0	0	0	0.257317	0.189664	0	0.309182	0	0.073401
864	SVE_0341000	0.194606	0.0635126	0	0	0	0	0.581315	0.570735	0	0.307436	0.147284	0.0723608
865	SVE_0342100	0.0655419	0.0643335	0	0	0	0	0.315218	0.247879	0.0777144	0.381959	0.448587	0.370833
866	SVE_0342200	0	0	0	0	0	0	0.125926	0.0620341	0	0.0764822	0.225015	0.0743465
867	SVE_0342300	0	0.065257	0	0	0	0	0	0.0626885	0	0	0	0
868	SVE_0342400	0	0.0654763	0.0644508	0	0	0	0.127829	0.0632168	0	0	0	0
869	SVE_0342500	0	0	0	0	0.0911765	0	0.251217	0.123834	0	0.0763547	0	0.0744544
870	SVE_0342600	0	0.129341	0	0.0621085	0	0.0920806	0.0631205	0.0624607	0.0768983	0	0	0.0711285
871	SVE_0342800	0.128751	0	0	0	0	0.0861795	0.634767	0.873712	0.23553	0.307152	0.174291	0.14687
872	SVE_0342900	0.193721	0.063306	0	0	0	0	0.638229	0.501956	0.550727	0.38468	0.0746276	0.219819
873	SVE_0343000	0	0.0632202	0	0	0	0	0.254946	0.438616	0.157137	0.153663	0.0745264	0.0731735
874	SVE_0343500	0	0	0	0	0	0	0	0	0	0	0	0
875	SVE_0343600	0	0.0633943	0	0	0	0	0	0.0631777	0.0785	0.076799	0	0.0725155
876	SVE_0343700	0	0.0637157	0	0	0	0	0	0	0	0	0	0
877	SVE_0343800	0	0.126479	0	0	0	0	0	0.0623218	0	0	0.150377	0
878	SVE_0343900	0	0.0422218	0	0	0	0	0	0	0	0.138714	0	0.0393477
879	SVE_0344100	0.520078	0.572611	0	0.237246	0	0	0.382478	0.250964	0.395338	0.231963	0.0756702	0.0744208
880	SVE_0344300	0.0651225	0.127464	0	0	0	0	0.190769	0.250504	0.223823	0	0.151715	0
881	SVE_0344400	0	0.0751499	0	0	0	0	0	0.0621534	0	0.153561	0	0.0740966
882	SVE_0345700	0	0	0	0	0	0	0	0.128398	0	0	0	0
883	SVE_0346200	0.0648901	0.126979	0	0	0	0	0.0633338	0	0	0	0.151073	0
884	SVE_0346300	0	0	0	0	0	0	0	0.128398	0	0	0	0
885	SVE_0346400	0	0	0	0	0	0	0.0654972	0	0	0	0	0
886	SVE_0346900	0.0651587	0.127662	0.558022	0.48525	0	0	0.0646818	0.127079	0.0791008	0.0773795	0.0745144	0.14639
887	SVE_0350500	0.385097	0.0629286	0	0	0.526707	0.771888	0	0	0	0	0	0.14583
888	SVE_0350800	0.128539	0.0629683	0	0	0.087534	0.171008	0	0	0	0.229101	0.29453	0.216969
889	SVE_0352200	0.131575	0.064398	0.0614979	0	0	0	0.0633996	0	0.157466	0	0.0755761	0
890	SVE_0352300	0	0.0634568	0	0.0594036	0.0887878	0.0867256	0.0637692	0.125438	0	0	0.0752982	0.147793
891	SVE_0352600	0.129898	0.254655	0.366096	0.358203	0.267038	0.434579	0.192232	0.0630146	0.237684	0.15495	0.150845	0.0740327
892	SVE_0354200	0.328821	0.451093	0	0	0	0	0	0.0629162	0	0	0	0
893	SVE_0354700	0	0.0628529	0	0	0	0	0.126523	0	0	0.0764638	0.0744007	0.0730419
894	SVE_0354800	0.13023	0.127549	0	0	0.0885083	0	0	0.127117	0	0	0	0
895	SVE_0355000	0.518121	0.444263	0	0	0	0	0.064171	0	0	0.0770201	0.0743994	0
896	SVE_0355200	0.198913	0.130797	0	0	0	0	0.127379	0	0.077534	0.0763619	0	0
897	SVE_0355700	0	0	0	0	0	0	0.0634614	0.374522	0.0784492	0.0767285	0.22398	0.219835
898	SVE_0356300	0	0	0.0645174	0.06283	0	0	0.0639803	0	0	0	0	0
899	SVE_0356400	0	0	0	0	0	0	0.128412	0	0.099903	0.0767193	0.0737961	0
900	SVE_0356500	0	0	0	0	0	0	0.269675	0.197877	0.0784421	0	0.162093	0.338103
901	SVE_0356600	0	0	0	0	0	0	0.14117	0	0	0	0	0
902	SVE_0356800	0.130257	0.129037	0.0651301	0.127611	0	0	0.129003	0	0	0	0	0.0681656
903	SVE_0357400	0	0	0	0.0606894	0	0	0.063635	0	0	0	0	0.0752142
904	SVE_0357500	0.19412	0.31688	0	0	0.351858	0.343671	0.321508	0.378922	0.0784823	0.0767812	0.295232	0.145019
905	SVE_0357700	0	0	0	0	0.0935311	0.0903652	0	0	0	0.0729984	0.0676401	0
906	SVE_0358300	0	0	0.0617646	0	0	0	0.0640789	0	0	0	0.076293	0
907	SVE_0358500	0	0.064291	0.247812	0.121222	0	0	0.324382	0.127542	0.0798573	0	0	0.0742863
908	SVE_0359500	0.195209	0.318733	0.185665	0.0605447	0.0885759	0.17304	0.0645787	0.0634407	0	0.0772874	0.148908	0.0731342
909	SVE_0359900	0.196429	0.512853	0.18401	0.24022	0.643734	0.179239	0.126179	0.186125	0.156226	0	0	0.298285
910	SVE_0360400	0.194652	0.0635999	0	0.0596616	0.0888907	0	0.0640177	0	0.237411	0.077401	0.0753143	0
911	SVE_0361300	0.453837	0.320576	0.258418	0.126616	0.282287	0.636282	0.128465	0.18694	0.0766129	0.148296	0.13734	0
912	SVE_0361500	0	0.192777	0.122443	0.119827	0.090336	0.176773	0.0643948	0.126708	0.0798577	0.0780872	0	0
913	SVE_0361600	0.522368	0.319871	0.0611145	0.179394	0.718132	0.43856	0.0642201	0.126392	0.159128	0	0.0759788	0
914	SVE_0363000	0.0651762	0.0638029	0.0625417	0.0611801	0.176671	0.172536	0.194882	0.0637672	0.0788578	0.0771669	0.0738186	0
915	SVE_0363300	0.327423	0.513154	0.610385	0.119658	0.0911789	0	0.126785	0.187426	0	0.0770049	0.22641	0.0747958
916	SVE_0365900	0.329013	0.324011	0.251112	0.183352	0.373242	0.2728	0.188655	0.246441	0.076595	0.150357	0.217165	0.216303
917	SVE_0366100	0	0.0638708	0	0	0	0.174327	0.192845	0.0632253	0	0.233117	0	0
918	SVE_0366200	0.129773	0.063601	0	0	0	0	0.320073	0.18889	0.158275	0	0.150621	0
919	SVE_0366300	0	0	0	0	0	0	0.0634557	0.124815	0	0	0.0747147	0.0733534
920	SVE_0366400	0.194822	0.254423	0	0	0.0882858	0.0862314	0.193596	0	0	0.0770608	0	0
921	SVE_0366500	0	0	0	0	0.176024	0.0859478	0.316739	0.186888	0.0783319	0.306409	0.149184	0.292778
922	SVE_0366600	0	0	0	0.0599503	0.267886	0.0872402	0	0.0632642	0	0.0777703	0	0
923	SVE_0366700	0	0.0641402	0	0	0	0	0.260259	0	0	0	0	0
924	SVE_0366800	0.391117	0.191376	0	0	0	0	0.130181	0.19162	0.0787501	0.308292	0	0
925	SVE_0367600	0	0	0	0	0	0	0.0633829	0	0	0	0	0.0736161
926	SVE_0367800	0.0633826	0.0627149	0.127475	0.12443	0.368782	0.623523	0.0624853	0	0	0	0	0
927	SVE_0368100	0.0650838	0	0	0	0	0	0.129965	0.191305	0	0.0769571	0	0.0721513
928	SVE_0368300	0	0	0	0	0	0	0	0	0	0	0	0
929	SVE_0368400	0	0	0	0	0	0	0	0	0	0	0	0
930	SVE_0368600	0.130158	0.063687	0.060611	0.0593715	0.0898633	0	0	0.0626295	0.0790552	0	0.298027	0.0745966
931	SVE_0368700	0	0	0	0	0	0	0.252559	0.124392	0.0783765	0.306564	0.0749371	0.14735
932	SVE_0368800	0	0	0.124089	0.0670376	0.0952268	0.0938707	0.129902	0.127682	0	0.15629	0	0
933	SVE_0369000	0.150125	0.221607	0.117784	0	0.437367	0.140709	0.00593216	0.164046	0.103987	0	0	0.118438
934	SVE_0369100	0	0	0	0	0	0	0.000550481	0	0	0	0	0
935	SVE_0369200	0	0	0	0.168033	0.266338	0.388515	0	0	0	0.424826	0	0.289508
936	SVE_0369300	0.0661764	0	0	0	0	0	0	0	0.077159	0	0	0
937	SVE_0369400	0	0.0642416	0	0	0	0	0.0636979	0	0.0790601	0.105199	0	0
938	SVE_0369500	0	0	0	0	0	0	0	0	0	0	0	0
939	SVE_0369600	0	0	0	0	0	0	0	0.187641	0.0778493	0.229641	0	0.0737414
940	SVE_0369700	0	0	0	0	0	0	0.193327	0.252519	0	0.0771487	0.0744427	0
941	SVE_0369900	0	0	0	0	0	0	0	0	0	0	0	0
942	SVE_0370000	0	0	0	0	0	0	0	0.191622	0.314348	0.229988	0.217215	0.142839
943	SVE_0370100	0	0	0	0	0.276761	0	0	0.121997	0	0	0	0
944	SVE_0370600	0.130123	0.0636981	0	0	0.0913498	0.178073	0.187953	0.246498	0.155103	0.379727	0.0745253	0
945	SVE_0371000	0	0	0	0.301285	0.0920214	0	0	0.125268	0.079006	0	0	0
946	SVE_0371100	0	0	0	0	0	0	0.314822	0.186093	0.391449	0.153326	0.0750929	0.370724
947	SVE_0371400	0.06463	0.063342	0.0603368	0	0.99164	1.23465	0	0.0615485	0.232684	0	0.0744316	0.0738608
948	SVE_0371800	0	0	0	0	0	0	0.129768	0.127888	0	0	0.218126	0.0719064
949	SVE_0372000	0.0657506	0.0646939	0	0	0	0	0	0	0	0	0.0707167	0
950	SVE_0372200	0.653155	0.319912	0.373053	0.364952	0.0888725	0.173616	0.389097	0.318509	0	0	0	0.0733399
951	SVE_0372300	0.131037	0.256725	0.935534	0.305072	0	0	0	0.3195	0	0	0	0.0735679
952	SVE_0372700	0.129207	0	0	0	0	0	0.511957	0.503106	0.392829	0.691586	0.297039	0.218787
953	SVE_0372800	0.064985	0.127226	0	0	0	0	0.259141	0	0	0	0.0735619	0
954	SVE_0373100	0.344614	0.452051	0	0	0	0	0.780601	0.191434	0.313704	0.285321	0.145981	0.143508
955	SVE_0373200	0	0	0.0958296	0.0604863	0.0888579	0.0868005	0.616076	0.782632	0.196922	0.100285	0.351913	0
956	SVE_0373300	0	0	0	0.0641705	0	0.362183	0.0641497	0.093796	0	0.036882	0	0
957	SVE_0373600	0.133127	0.254803	0.294846	0.30785	0.366047	0.171925	0	0	0	0	0.073254	0
958	SVE_0373700	0	0	0	0	0	0.0932454	0.329243	0.504927	0	0.154029	0	0.151072
959	SVE_0373800	0.127654	0	0	0	0	0	0.0648376	0.127729	0	0	0	0
960	SVE_0375600	0.0643996	0.0630567	0	0	0	0.0874834	0	0	0	0	0	0
961	SVE_0375700	0.0659294	0.129111	0.184367	0.0601378	0	0.089501	0	0	0	0	0	0
962	SVE_0375800	0	0	0	0	0	0	0	0	0	0	0	0
963	SVE_0375900	0	0	0	0	0.0876158	0	0	0	0	0	0	0
964	SVE_0376000	0	0	0.127189	0.124518	0	0	0	0	0	0	0	0
965	SVE_0376200	0.194089	0.0633479	0	0	0.272475	0.088494	0.31157	0.1839	0.308778	0	0.148303	0.221019
966	SVE_0376300	0.130184	0.190982	0	0.119236	0.182395	0.533421	0.563646	0.616957	0.077764	0.152347	0.149239	0.0741717
967	SVE_0376400	0.199001	0.19523	0.627042	0.489258	0	0	0	0	0.0778313	0	0	0
968	SVE_0376900	0.130016	0.0637006	0	0	0.445848	0.870905	0.0640228	0.0629706	0	0.077463	0	0
969	SVE_0377000	0.0649218	0	0	0.181192	0	0.0863302	0.19328	0.253169	0.2365	0	0.148598	0.218943
970	SVE_0377100	0	0.0632248	0	0	0	0	0	0.0623359	0	0	0.150378	0
971	SVE_0377200	0.325333	0.3189	0	0	0	0.0870067	0	0.126328	0	0	0	0
972	SVE_0377400	0.503969	0.557908	0.122138	0.298739	0.179223	0.26272	0.0881091	0.126271	0.0794698	0.155498	0	0.298048
973	SVE_0377500	0.448038	0.367358	0.0713132	0.42885	0	0.177082	0	0.291088	0	0.154419	0.129765	0
974	SVE_0378500	0	0	0	0	0	0	0.239894	0.310527	0.175531	0.459822	0.375716	0.147761
975	SVE_0379000	0.129758	0	0	0	0	0	0.582354	0.254039	0.470742	0.307115	0.146742	0.504741
976	SVE_0379100	0	0.12661	0	0	0.0889979	0.257641	0.0641711	0.0834425	0	0.153458	0.49876	0.25042
977	SVE_0379400	0.0644664	0.0631854	0	0	1.33855	0.862762	0	0	0	0.076895	0	0
978	SVE_0379600	0.0647522	0.126843	0	0	0.264096	0	0	0.12639	0.0785417	0	0.0738712	0
979	SVE_0380100	0.196898	0.0645779	0	0	0.470199	0.183456	0.0636714	0.0622726	0.229851	0.0747406	0.21177	0.139258
980	SVE_0380500	0	0.0628858	0	0	0.0887494	0.348012	0.250972	0.247267	0	0	0.149645	0.0736308
981	SVE_0381000	0.189642	0	0.324642	0.0634044	0.184871	0.623708	0	0.122357	0.0744179	0	0	0
982	SVE_0381100	0	0	0	0	0	0	0.314771	0.185913	0.156499	0.076701	0.37579	0.370851
983	SVE_0381200	0	0	0	0	0.184197	0.268157	0.125356	0.0611597	0	0	0	0
984	SVE_0381300	0.196396	0.128826	0	0	0.1876	0.365978	0.317546	0.186342	0	0.372751	0.21123	0.138903
985	SVE_0381500	0.326179	0.191487	0	0	0	0.178189	0.0627527	0.0618379	0.0779773	0	0	0.148778
986	SVE_0381600	0.0643487	0.0630215	0	0	0.531703	0.173215	0.25291	0.0621912	0.313585	0.0766766	0.149941	0.0737053
987	SVE_0381700	0	0	0	0	0	0	0	0	0	0	0.0362117	0
988	SVE_0381800	0	0	0	0	0.539358	0.527785	0.124627	0.183933	0.231934	0	0.07421	0.220918
989	SVE_0381900	0	0	0	0	0.268587	0.175179	0.187852	0	0	0	0	0
990	SVE_0382000	0	0	0	0	0	0	0	0	0	0	0	0
991	SVE_0382300	0	0	0	0	0	0	0	0	0	0	0	0.0730473
992	SVE_0382500	0.0974165	0.308255	0	0.442114	0.281477	0.544331	0.0638481	0.00420022	0.152272	0.0735674	0	0
993	SVE_0382600	0	0.12925	0	0	0	0	0	0.175579	0.0790753	0	0	0
994	SVE_0382700	0	0	0	0	0	0	0	0.0627664	0	0	0	0.0728589
995	SVE_0383000	0.322035	0.252258	0	0	0.267848	0.175085	0.125462	0	0.233862	0.152825	0.149767	0
996	SVE_0388500	0.980803	0.386356	0.311906	0.242925	0.0927208	0.361434	0.0624875	0	0.076111	0	0.071931	0.14329
997	SVE_0389100	0.258823	0.0633109	0	0	0.361591	0.618408	0.12463	0.122753	0	0.30277	0.445862	0.147633
998	SVE_0390700	0.192859	0	0	0	0.443765	0.608651	0.188766	0.433929	0.0781462	0.152892	0.0749278	0.515623
999	SVE_0391400	0	0	0	0	0.182407	0.175177	0	0	0.220639	0	0	0
1000	SVE_0391500	0	0	0	0	0	0.176701	0.0619577	0	0	0	0	0.0729394
1001	SVE_0391600	0.0652079	0.0638386	0	0	0	0.0890569	0.0627937	0	0	0	0	0
1002	SVE_0391900	0	0	0	0	0	0	0.125587	0	0.0778361	0.0761491	0.149002	0.14654
1003	SVE_0392000	0	0	0	0	0	0	0	0.122618	0.0774983	0	0.148771	0.0734496
1004	SVE_0392100	0	0	0	0	0	0	0	0.064199	0	0	0	0
1005	SVE_0392200	0	0	0	0	0	0	0.065497	0	0	0	0	0
1006	SVE_0392300	0	0	0	0	0.185649	0.0907775	0.0851917	0	0.0754851	0	0	0.0070273
1007	SVE_0392400	0	0	0	0	0	0	0	0.0631421	0	0.0779935	0	0
1008	SVE_0392500	0	0.0636994	0	0	0	0	0.064136	0	0.158474	0.0774719	0	0
1009	SVE_0392600	0.0661976	0	0	0	0	0	0	0.0632143	0	0	0	0
1010	SVE_0392700	0.065721	0	0	0	0	0	0.0639841	0	0	0.0778814	0	0
1011	SVE_0392800	0	0.0648547	0	0	0	0	0.0635772	0.0624396	0	0	0.0754112	0
1012	SVE_0393200	0.129655	0.129112	0.532686	0.585205	0.0947946	0	0.259193	0.3137	0.152635	0	0.068502	0.27019
1013	SVE_0394500	0.0650223	0.12752	0	0	0	0	0	0.062029	0	0	0.075118	0
1014	SVE_0394600	0.131491	0.0645007	0	0	0	0.0922458	0.063376	0.0624576	0	0	0.142037	0.0702351
1015	SVE_0394700	0	0	0	0	0	0	0	0.123492	0.155503	0	0.074222	0.145675
1016	SVE_0394800	0.130725	0.0642572	0.127193	0.124295	0	0.0912012	0.0631123	0.124031	0	0	0	0
1017	SVE_0394900	0.458455	0.258586	0.314744	0.0612224	0.37348	0.273191	0.125663	0.0617358	0.229759	0.15062	0.21692	0.21605
1018	SVE_0395100	0	0	0	0	0	0	0.253599	0.437441	0.157679	0.0770784	0	0.149629
1019	SVE_0395300	0	0	0	0	0	0	0	0	0	0	0	0
1020	SVE_0395400	0	0.127551	0	0	0.0882984	0	0.0696421	0	0	0	0	0
1021	SVE_0395500	0	0	0	0	0	0	0	0	0	0.0146407	0	0
1022	SVE_0395600	0	0	0	0	0	0	0	0	0	0	0	0
1023	SVE_0395700	0.0659582	0.129303	0	0	0	0	0.0634915	0	0.0784401	0.153964	0	0
1024	SVE_0395800	0	0.064156	0	0	0	0	0.0636131	0.0625224	0	0	0	0.0748365
1025	SVE_0396000	0	0	0.0619692	0	0.367452	0.628512	0.308514	0	0	0	0	0.141322
1026	SVE_0396100	0.321139	0	0.122086	0.239025	0.09138	0	0	0.0618752	0	0	0.0748969	0.0744622
1027	SVE_0396200	0.126734	0	0	0	0.444839	0.346627	0	0	0	0	0	0
1028	SVE_0398200	0.133098	0.0655417	0	0	0	0	0.0636741	0.0629017	0	0	0	0
1029	SVE_0398800	0.389869	0.191072	0	0.0596368	0.822111	0.355425	0	0.0615288	0.0772745	0.227514	0	0.0739076
1030	SVE_0399900	0	0.128623	0.30672	0.359978	0	0	0.257908	0.50735	0.559532	0.156412	0.229419	0
1031	SVE_0400000	0	0.24975	0	0	0	0	0	0	0	0	0	0.0726902
1032	SVE_0400100	0	0.126425	0	0	0	0	0.127337	0.125204	0.0786005	0	0.0746525	0.146583
1033	SVE_0400500	0.390084	0.636317	0	0	0	0	0.127125	0.37553	0.318111	0.309095	0	0.0744997
1034	SVE_0400600	0.0660027	0.064599	0	0	0	0	0.442844	0.12385	0.077391	0.608377	0.672177	0.443123
1035	SVE_0401100	0	0.0637157	0	0	0	0	0	0	0	0	0	0
1036	SVE_0403200	0.065069	0.127376	0	0	0	0	0.0649116	0.0637087	0.0786705	0	0	0.072276
1037	SVE_0403600	0.130723	0	0.182715	0.119257	0	0	0.127905	0	0	0.0776302	0.152101	0.0748274
1038	SVE_0403800	0	0.0646908	0.123228	0.0603178	0	0	0	0.127046	0	0	0.0768971	0
1039	SVE_0404300	0.195737	0.127943	0.0614566	0.0601268	0	0	0.0644505	0.0633679	0	0.0777707	0.07551	0.074135
1040	SVE_0408900	0.39329	0.192581	0.0612583	0.179697	0.631668	0.441223	0.0643662	0.0633203	0.0798019	0.156109	0	0
1041	SVE_0409600	0.196687	0.385045	0.306835	0.420815	0.0920502	0.0896591	0.0631435	0.124223	0	0.0765596	0.150359	0
1042	SVE_0410100	0.392891	0.192921	0.431468	0.301307	0.0924663	0	0.063088	0.124247	0.155848	0.0764942	0.150127	0.223203
1043	SVE_0410200	0.326454	0.321288	0.123692	0.301317	0.0923072	0.0905353	0	0.0611346	0.0763497	0	0	0.0726743
1044	SVE_0410300	0.0645	0.126368	0	0	0	0.346503	0	0.0624104	0	0	0	0.0737593
1045	SVE_0412400	0.712542	0.126853	0	0.059113	0.089795	0.259357	0.0630911	0.186236	0.156803	0.0768512	0.150626	0.0743126
1046	SVE_0412800	0.836496	0.3154	0	0	0	0	0	0.25015	0.0783804	0.0766488	0.29726	0.218905
1047	SVE_0413900	0	0.319454	0.245055	0.239248	0.0918335	0.0892401	0.0625819	0	0	0	0	0.0736742
1048	SVE_0414400	0	0	0	0	0	0	0	0	0	0	0	0
1049	SVE_0414700	0	0.0633836	0	0	0	0	0	0	0.0785813	0.0768672	0	0
1050	SVE_0414800	0.131859	0.0646339	0.31096	0.54761	0	0	0.0651721	0	0.080318	0	0	0
1051	SVE_0415600	0.192114	0.12588	0	0	0.549096	0.359464	0.0616056	0	0	0	0	0
1052	SVE_0415700	0.709701	0.41197	0.162065	0	0.20042	0.410444	0	0.219452	0	0	0.0736523	0.219256
1053	SVE_0415800	0.131088	0.193533	0	0	0.370777	0.453308	0.0627708	0.122949	0.0765146	0.0752347	0	0
1054	SVE_0418000	0	0	0.0629564	0	0	0.0905002	0	0.12272	0	0	0	0
1055	SVE_0418200	0.130418	0.255362	0.121801	0	0	0.0878059	0.128009	0.0629547	0.158688	0	0.0759031	0
1056	SVE_0419300	0.256563	0.0639341	0	0	0.187903	0.180982	0.0641481	0.0623588	0	0	0.0682202	0
1057	SVE_0419400	0.0648473	0.190465	0	0	1.0554	1.4602	0.0645893	0	0	0	0	0.0722865
1058	SVE_0420000	0.200027	0.065413	0	0	0	0	0.0638421	0.252175	0.155417	0	0.0726684	0
1059	SVE_0420100	0.198017	0.130621	0	0	0.0960113	0	0.325356	0.381674	0.0777526	0.074934	0.208301	0.206259
1060	SVE_0420200	0.321589	0	0	0	0.264688	0.516981	0	0.0622988	0	0.0766382	0	0.0734298
1061	SVE_0422100	0.201768	0	0.283494	0.182062	0.902986	0.328398	0.0786634	0.127849	0	0	0	0
1062	SVE_0422200	0	0.316299	0	0	0.344671	0.1481	0.241082	0.125093	0.157364	0.280943	0.0750234	0
1063	SVE_0423400	0.0659511	0.129116	0	0	0	0	0	0.0626272	0	0	0	0
1064	SVE_0425400	0.394521	0.257895	0.370043	0.301956	0.462186	0.720402	0.12684	0.124645	0	0.0767791	0	0
1065	SVE_0425600	0.19731	0.387592	0.991041	0.786338	0.092876	0	0.0633262	0.0621931	0.0781856	0.153412	0	0.0745352
1066	SVE_0426600	0.259238	0.254794	0.314229	0.122354	0.833567	0.63664	0.0623477	0	0	0	0.0703684	0
1067	SVE_0426800	0	0	0	0	0.550301	0.801407	0.124698	0.183719	0	0.150953	0	0.0733242
1068	SVE_0427000	0	0	0.124457	0.243391	0.366599	0	0	0	0	0	0	0
1069	SVE_0428400	0.066338	0	0	0.186227	0	0	0	0	0.0775559	0.0763195	0	0
1070	SVE_0429100	0.196493	0.12902	0	0	0.0929491	0	0.125473	0.122917	0	0	0.144943	0.0720793
1071	SVE_0429300	0.0650452	0	0	0	0	0	0.0648169	0.318141	0.157426	0	0	0.0724298
1072	SVE_0429900	0	0	0	0	0	0	0	0.126339	0	0.155919	0	0
1073	SVE_0430000	0.196205	0.256329	0.124158	0.060732	0	0	0	0.127426	0.3179	0	0	0.0736719
1074	SVE_0431100	0	0.126441	0	0	0.622425	0.174126	0.126555	0.187009	0.0785611	0	0.0751955	0
1075	SVE_0431200	0.129461	0	0	0.0597717	0.442253	0.172824	0.192012	0.880849	0.157679	0.308397	0.298938	0.0733817
1076	SVE_0434000	0.452126	0.189908	0	0	0	0	0.0635859	0	0.314964	0.230921	0.0751665	0
1077	SVE_0436800	0.0653336	0.255735	0	0.119197	0.269887	0.0880895	0.255863	0.0630059	0.0794278	0.0776252	0	0
1078	SVE_0439500	0.0640317	0.0636091	0	0	0.735204	1.23136	0	0.124028	0	0	0	0.134352
1079	SVE_0440200	0.3806	0.38068	0	0.0644497	0.281458	0.359551	0.063444	0	0	0	0	0.0654367
1080	SVE_0440500	0.0650198	0.191191	0.0609152	0.11919	0.446549	0.349109	0.447925	0.125896	0	0.154993	0.0757193	0.29718
1081	SVE_0440700	0	0.0646027	0	0	0	0	0.0645999	0	0	0	0	0
1082	SVE_0442400	0	0.194874	0	0.246746	0.281933	0	0.126246	0.249097	0	0.0758406	0	0
1083	SVE_0443800	0.459128	0.321326	0.37365	0.426466	0.714882	0.0872892	0.130081	0.127808	0	0	0	0
1084	SVE_0444800	0.0666801	0	0.0627956	0	0	0	0.255621	0.250387	0	0	0.301808	0
1085	SVE_0444900	0.325239	0.0644579	0	0	1.21936	0.63805	0.0639217	0.372841	0.0765629	0.149441	0	0.0690817
1086	SVE_0446000	0.195997	0.19195	0.121833	0.119294	0	0	0.127892	0.188995	0.0794179	0.0776902	0.152294	0.149718
1087	SVE_0446400	0.13046	0.127921	0.367097	0.179731	0.275104	0.625334	0.251661	0.0618261	0	0.228503	0.0747827	0.222893
1088	SVE_0446800	0	0.268731	0	0	0	0	0.0633444	0.198754	0.0905664	0.0768493	0	0.0748914
1089	SVE_0446900	0	0	0	0	0.61403	0.0854339	0	0	0	0	0	0
1090	SVE_0448400	0.322844	0.452076	0	0.131207	0.095499	0.0914968	0	0.125651	0	0.146918	0.0676239	0.199824
1091	SVE_0448500	0	0.12589	0	0	0.0890162	0.17454	0.188183	0.0618117	0.0779936	0.0763502	0.0747946	0.0738805
1092	SVE_0448700	0	0	0	0	0	0	0	0	0	0	0.0724233	0
1093	SVE_0448800	0	0	0	0	0	0	0	0	0.0783358	0	0	0
1094	SVE_0450500	0.128973	0.063207	0	0	0	0.088035	0	0.122952	0	0	0	0.14739
1095	SVE_0450700	0	0.0653748	0	0	0	0	0	0.125154	0	0	0	0
1096	SVE_0451200	0.390989	0.25505	0.242953	0.297161	0.537911	0.0877497	0	0.125759	0.0792611	0.0774653	0	0.149157
1097	SVE_0451300	0.261973	0.513504	0.305714	0.29928	0.274061	0.268101	0.0633448	0.249483	0.0785979	0.0770134	0.0754259	0
1098	SVE_0451500	0.195516	0.12854	0.0646713	0.126747	0	0	0	0.0626041	0.076976	0	0	0
1099	SVE_0454400	0.192144	0.127037	0.130969	0.127836	0	0	0	0.062032	0	0	0	0
1100	SVE_0454500	0.847686	0.51216	0.0613431	0.119925	0.183905	0.268066	0.188537	0.309112	0.232729	0	0.149499	0.0740923
1101	SVE_0455800	0.130805	0	0	0.0607459	0.649202	0.180761	0.0625025	0.122471	0	0	0	0.0716626
1102	SVE_0455900	0.105919	0	0.286372	0	0.13637	0	0	0.363365	0	0.274342	0	0.184312
1103	SVE_0459300	0.130217	0.254995	0.0623351	0.0609789	0	0.0862784	0.0648227	0.063644	0.078847	0.0771497	0.0739336	0.0726464
1104	SVE_0459500	0.194919	0.0638813	0	0	0.0929771	0.182222	0.0624043	0.0615757	0	0	0.0711392	0.0705176
1105	SVE_0459900	0.194909	0.193186	0.262318	0.0638585	0	0.182562	0.128406	0	0	0	0.0685956	0.0677322
1106	SVE_0470000	0.196714	0.320971	0.122626	0.0599678	0.183337	0.089553	0.18943	0.0622512	0.0784718	0.076767	0.150646	0
1107	SVE_0470300	0.0665623	0.0656314	0.127615	0.0621163	0	0	0.0637742	0.187965	0	0	0	0
1108	SVE_0470400	0	0.0640116	0	0.0600765	0	0	0	0	0	0	0	0.146921
1109	SVE_0472300	0.196187	0.384539	0.0612577	0.0599401	0.44873	0.350665	0	0.06331	0.0797193	0.0779306	0	0
1110	SVE_0472400	0.326965	0.384032	0.0609198	0	0.270468	0.176605	0.127924	0	0	0	0	0
1111	SVE_0473100	0.393207	0.192071	0.369767	0.301011	0.554988	0.539555	0.0628094	0.0615039	0.0770189	0	0.0742861	0.220815
1112	SVE_0473600	0.129939	0.193102	0.19162	0.062769	0.375514	0.272915	0.0638753	0.0621394	0.0764528	0.0745799	0	0.0688369
1113	SVE_0474200	0.130252	0.129707	0.26757	0.391934	0	0.367186	0.325484	0.252116	0.153338	0.14846	0.0688176	0.407151
1114	SVE_0475400	0.0621745	0	0.383439	0.375684	0.0909398	0	0	0	0	0	0	0
1115	SVE_0476900	0.262868	0.193245	0.123127	0.0602338	0.180513	0.529087	0.0646826	0	0	0	0	0
1116	SVE_0477000	0.0643661	0.378523	0	0	0.442169	0.518532	0	0.0623138	0.156895	0	0	0.0735381
1117	SVE_0478100	0.0640564	0	0.0657942	0	0.0936673	0.0902891	0	0	0	0	0.0676874	0.0667442
1118	SVE_0478500	0.0643896	0.0631038	0	0	0.0883656	0.0863175	0.253534	0.374015	0.235479	0.230196	0.224821	0.147062
1119	SVE_0480300	0	0.0645591	0	0	0	0	0	0	0	0	0	0.0702987
1120	SVE_0481400	0.0647959	0.127365	0	0	0.458179	0.0896652	0.0621727	0	0.075905	0	0	0
1121	SVE_0483000	0.0647915	0	0	0	0	0	0.575196	0.251397	0.0790277	0.0772827	0	0.147689
1122	SVE_0483900	0	0	0.190894	0	0.0929431	0.0898901	0	0	0	0	0.136606	0.0679015
1123	SVE_0484200	0	0	0	0	0	0	0	0	0	0	0	0
1124	SVE_0485300	0.0636106	0.190872	0.265227	0.12926	0	0	0	0	0.0743664	0	0	0
1125	SVE_0486000	0	0.213479	0	0	0	0	0.765825	0.323586	0.272948	0.173825	0.302156	0
1126	SVE_0486200	0.0658434	0.12896	0	0.0605044	0	0.180642	0.126243	0.123859	0	0.152649	0.074786	0
1127	SVE_0489100	0.457285	0.255715	0.122118	0.179609	0.366206	0.267822	0.0628789	0.123872	0.234182	0.152788	0.149945	0.148818
1128	SVE_0489600	0.261483	0.193131	0.561295	0.607167	0.463493	0.271011	0.0624724	0	0	0.0746854	0.0719136	0.143256
1129	SVE_0489700	0.0635382	0.251335	0.316567	0.992679	0.0922156	0.445404	0	0	0.0750819	0	0	0
1130	SVE_0492800	0	0.0636279	0.0609347	0	0	0	0.0640075	0.251734	0	0.0774309	0.0754304	0.0740709
1131	SVE_0493200	0.131642	0.257855	0.430715	0.240697	0.18129	0.354356	0.129349	0.0636143	0	0	0	0
1132	SVE_0493300	0.130403	0.19166	0	0	0.179369	0	0.0641145	0.0630976	0	0.0776824	0	0
1133	SVE_0493900	0.327638	0.128389	0	0	0.0909964	0	0.318914	0.125407	0	0	0	0
1134	SVE_0495000	0.326718	0.255994	0.121854	0.17894	0.0902416	0.176798	0.191759	0.0629844	0.0794043	0	0	0.149774
1135	SVE_0496300	0.258705	0.380017	0	0	0	0	0.192992	0	0.156771	0.306769	0.0736108	0.289289
1136	SVE_0501900	0.0652694	0.0641348	0	0	0	0	0.188613	0.061866	0	0	0.0747175	0.0741515
1137	SVE_0503800	0.128963	0.0631301	0	0	0.362141	0.264727	0.0620923	0	0.3843	0	0	0.0734199
1138	SVE_0503900	0.12931	0	0	0	0.884868	0.777943	0.127605	0.188249	0	0.385346	0	0.0735989
1139	SVE_0505600	0.132147	0.129743	0.124318	0.12152	0	0	0.127362	0	0	0	0.0757438	0
1140	SVE_0505700	0	0	0	0	0	0	0.755737	0.619765	0.391295	0.38358	0.375489	0.445014
1141	SVE_0508300	0.319329	0.319049	0.13129	0.128635	0.280242	0.0899884	0.0638265	0.123625	0.150574	0.0729347	0	0
1142	SVE_0508400	0.130475	0.448067	0.429374	0.17997	0.275662	0	0.0628781	0	0.0777092	0	0.074838	0.0741104
1143	SVE_0510700	0.258452	0.126693	0	0	0.708032	0.777994	0.31877	0.125402	0.0788227	0.0770638	0.0749799	0
1144	SVE_0512700	0.389477	0.0636164	0	0	0.26725	0.348075	0.127797	0.0628424	0.0791305	0.154711	0	0
1145	SVE_0514000	0.324697	0.254495	0.182711	0.1789	0.73023	0.621413	0.187583	0	0	0	0.0744037	0.0739053
1146	SVE_0514900	0.132558	0.0655352	0	0	0	0	0	0.0630969	0.0776407	0	0.142223	0
1147	SVE_0516300	0.129006	0.0632467	0	0	0.353027	0	0.191093	0.187893	0.314588	0	0.149412	0.0733431
1148	SVE_0518000	0.13234	0.130259	0.313376	0.366186	0	0.274333	0.0634939	0.0619308	0	0	0	0
1149	SVE_0518100	0.716853	0.638909	0.0614388	0.180327	0.356398	0.609337	0.0644019	0	0.158819	0	0	0.147945
1150	SVE_0518900	0	0	0	0	0.0878451	0.171559	0	0	0	0.076287	0	0
1151	SVE_0519700	0.455102	0.700389	0.0606327	0	0.540284	0.441637	0.253632	0.0624595	0	0.0772516	0	0.149424
1152	SVE_0520100	0.130727	0.0641675	0.247248	0	0.0924693	0.180164	0.0628229	0.0614573	0.0767908	0	0.148167	0
1153	SVE_0520200	0.456621	0.0639896	0.245225	0.419249	0.0918676	0.26778	0.188549	0.24743	0.0776474	0	0.0747983	0.0742184
1154	SVE_0521500	0.266256	0.130388	0.559888	0.425811	0	0	0	0.0643073	0	0	0	0
1155	SVE_0522400	0.32523	0.0644561	0	0.125549	0	0.182295	0.0639199	0.0621385	0.0765608	0	0	0
1156	SVE_0525300	0.195653	0.319488	0.121634	0.119043	0.362651	0.266233	0.126742	0	0.0787075	0.154361	0.150938	0
1157	SVE_0529000	0.06518	0.0638155	0	0.0594579	0	0	0	0	0	0	0.075733	0
1158	SVE_0530500	0.325124	0.127461	0	0	0	0	0.0630602	0.0619887	0.156515	0.153444	0.0750309	0.0743135
1159	SVE_0532400	0.585366	0.445671	0.242338	0.118715	0.269557	0.0880842	0.0635227	0.25034	0.237076	0.154541	0.0757521	0.223637
1160	SVE_0535500	0.31987	0.382409	0.265162	0.323052	0.376569	0.812134	0.128062	0.0619	0.0750984	0	0.134298	0
1161	SVE_0535900	0.130154	0.128265	0.0619852	0	0.184192	0.270103	0.186871	0	0	0.0746511	0	0
1162	SVE_0536000	0.450956	0.189445	0	0	0.352853	0.17229	0.127163	0.0625384	0.15712	0	0.0747342	0.146755
1163	SVE_0536400	0.3244	0.127193	0	0	0	0	0.256039	0.125896	0.237433	0	0.226029	0
1164	SVE_0536500	0.160916	0.443474	0	0.146679	0.191978	0.696508	0.289854	0.0864916	0.267201	0.154161	0.0995553	0.0740934
1165	SVE_0536600	0	0	0	0	0.0876157	0	0	0	0	0	0	0
1166	SVE_0537400	0.127795	0	0	0	0	0	0	0	0.0778167	0.0760999	0.0737495	0.0724149
1167	SVE_0539000	0.0630022	0.0627383	0	0.126384	0.184252	0.532818	0	0.0609738	0	0	0	0
1168	SVE_0539600	0.195634	0.127758	0.547735	0.297876	0.181763	0.177946	0.126279	0.18657	0.0783784	0	0.375874	0.596251
1169	SVE_0539700	0	0.0648607	0.187181	0.121555	0.18635	0.182007	0.126331	0.061665	0.0768963	0.0757338	0.0735059	0
1170	SVE_0539900	0.130112	0.255146	0.490149	0.479543	0.177985	0.260837	0	0.252719	0.0793064	0.155098	0.0753046	0
1171	SVE_0540300	0.0658106	0.129021	0	0	0	0	0	0.125612	0	0	0	0
1172	SVE_0541800	0	0	0	0	0	0	0.191055	0.25064	0.0788804	0.0771699	0.150757	0
1173	SVE_0543800	0.0648973	0.0636076	0	0.118931	0	0	0.0638582	0.188484	0.158189	0.309459	0.226728	0.370725
1174	SVE_0544000	0.524404	0.129311	0.18785	0.0608309	0.464898	0.454365	0.251033	0.307702	0	0.225117	0	0.215945
1175	SVE_0546100	0.392887	0.192724	0.568973	0.431475	0.0932207	0.182929	0.188096	0	0.228949	0.0746951	0.142734	0.0705614
1176	SVE_0547600	0.130459	0.191683	0.372836	0.12158	0.621062	0.433303	0.194361	0.318183	0.0791511	0	0.148997	0
1177	SVE_0547700	0.131364	0.257409	0.183749	0.419615	0.273924	0.178752	0.255288	0.188187	0.317071	0.15546	0	0
1178	SVE_0552200	0.0653255	0	0	0.119153	0.181583	0.177798	0.126912	0	0	0	0	0
1179	SVE_0553400	0.256505	0.254236	0.129456	0.0630293	0.372772	1.08115	0.126738	0.0619477	0	0.0728507	0	0
1180	SVE_0555700	0.196434	0	0.857023	0.299323	0.274482	0.447691	0.253013	0.124581	0.235479	0.153739	0	0.0748352
1181	SVE_0556600	0.320507	0.251005	0	0	0.0884429	0.34666	0.188183	0	0	0.0761759	0.224027	0.0734279
1182	SVE_0556700	0	0	0.195517	0.127708	0.0927411	0	0	0	0.0747444	0.0724094	0	0
1183	SVE_0556900	0.0654618	0.192579	0.0632667	0	0.279906	0.1828	0.0626542	0.185998	0.0763303	0.0747841	0	0
1184	SVE_0558500	0.326588	0.319286	0.491298	0.35959	0.184235	0.447934	0.125073	0	0	0	0.296099	0
1185	SVE_0558600	0.195902	0.12806	0.0612493	0.179926	0	0	0	0	0.0778224	0	0.074864	0.148757
1186	SVE_0571200	0.0655482	0	0.190051	0.246925	0.186851	0.457604	0.125474	0.186243	0.152863	0	0.071613	0.0706963
1187	SVE_0572600	0.260638	0.191598	0.245009	0.119877	0	0	0.0643039	0.0632415	0.238355	0.233015	0.0755663	0.29676
1188	SVE_0573100	0	0	0	0	0	0	0.0635104	0.122234	0	0.154757	0	7.61945e-05
1189	SVE_0573200	0.0650295	0.0636148	0	0	0	0	0.585685	0.829844	0.470523	0.307055	0.291825	0.143446
1190	SVE_0573300	0	0	0	0	0	0	0	0	0	0	0	0
1191	SVE_0573400	0.260366	0.191406	0	0	0	0	0	0	0	0	0	0
1192	SVE_0573900	0.197695	0.322817	0.247212	0.726165	0	0	0.317255	0.124804	0	0.0769201	0.151005	0.149993
1193	SVE_0574900	0.195922	0.256015	0.428492	0.419341	0.179135	0.0874814	0.0643156	0.379545	0.0795961	0	0	0.22364
1194	SVE_0576400	0.657498	0.644419	0.618097	0.181441	0.359944	0.351609	0.0648836	0.0638128	0	0	0	0
1195	SVE_0576500	0	0	0	0	0	0	0.451642	0.380047	0.235217	0.153442	0.293844	0.288743
1196	SVE_0579400	0	0.193577	0	0.060185	0	0.0898234	0.0637693	0.125694	0.0792449	0.0774627	0	0
1197	SVE_0579800	0	0.0639445	0	0	0	0	0.125813	0.433794	0.0781106	0.229538	0.224856	0.149005
1198	SVE_0579900	0	0	0	0	0.0885181	0	0	0	0.228488	0	0	0.145048
1199	SVE_0580100	0	0	0	0	0	0	0	0	0	0	0.216121	0.0716062
1200	SVE_0580200	0.0655859	0.0646687	0	0	0	0.272743	0.0628387	0.0617357	0	0	0	0
1201	SVE_0580300	0.130999	0.193175	0.254919	0.124555	0.656947	0.548352	0.0632444	0.186436	0.07635	0.148891	0	0.139138
1202	SVE_0583100	0.0652377	0.192133	0	0.361365	0	0.179817	0	0.0613392	0	0	0	0.145904
1203	SVE_0583200	0.132525	0.0648751	0.309015	0.423117	0	0	0	0	0	0.0785876	0	0
1204	SVE_0584400	0	0.0628043	0	0	0.0888901	0	0	0	0	0	0	0
1205	SVE_0584800	0.0660426	0.129236	0.185286	0	0	0	0.4447	0.187806	0.315765	0.154538	0.151486	0
1206	SVE_0586200	0.0746078	0.247881	0.311565	0	0	0	0.236392	0.0762762	0	0.179373	0	0.146041
1207	SVE_0586400	0	0	0	0	0.0894351	0.0876602	0.0956159	0	0.222112	0	0	0
1208	SVE_0586500	0.583328	0.317723	0	0	0	0	0.19186	0.0629023	0.0790697	0.154618	0	0.147696
1209	SVE_0586600	0.12789	0	0	0	0.354296	0.607654	0	0.0614747	0.0775606	0.15193	0.371941	0.0734857
1210	SVE_0586900	0.391565	0.384852	0.0632835	0.184808	0.279791	0.274746	0.125564	0.18571	0	0	0.0708585	0.0699993
1211	SVE_0587300	0	0	0.186611	0.0608469	0	0.0893484	0	0.0643218	0	0	0	0
1212	SVE_0587600	0.129473	0.380681	0	0.296677	0.444288	0.260422	0.191192	0.125348	0.0789203	0	0.150676	0.0739324
1213	SVE_0587900	0.131596	0.321993	0.124024	0.363315	0.371561	0.361957	0.0630672	0.0617326	0.154302	0.0758112	0.0744546	0
1214	SVE_0588000	0	0	0.123219	0.120409	0.277765	0.0898913	0	0.0618215	0	0	0	0
1215	SVE_0589400	0.186914	0.062318	0.129891	0.063303	0.276451	0.0882885	0.124631	0	0	0	0	0
1216	SVE_0590400	0.450756	0.0631197	0	0	0.0882519	0.086173	0.25412	0.312381	0.157102	0.153626	0.299113	0.293601
1217	SVE_0590500	0	0.0631408	0	0	0	0	0.0633077	0.311414	0.156968	0	0.150192	0.0738699
1218	SVE_0592300	0.261011	0.191381	0.184053	0.119745	0.184053	0.268495	0	0	0.0766589	0.0753509	0.0739512	0
1219	SVE_0592400	0.524097	0.769437	0.378029	0.369791	0	0	0.392194	0.256608	0.158389	0	0	0
1220	SVE_0592500	0	0	0	0	0	0	0	0	0	0.0767061	0	0
1221	SVE_0592600	0.0645113	0	0	0	0.270401	0	0.0622914	0	0.154642	0.22727	0.0742311	0.0737363
1222	SVE_0593000	0	0	0.124939	0.0609779	0	0.0909512	0	0.0628053	0	0	0	0
1223	SVE_0593600	0	0	0.246401	0.120533	0.267658	0.174327	0	0.0634489	0	0	0.150797	0
1224	SVE_0593800	0.457732	0.0640278	0.610021	0.656406	0.453233	0.266637	0.191067	0.125334	0	0.0775796	0.076027	0
1225	SVE_0594000	0.0658657	0.194593	0	0	0	0.819186	0.188836	0.0616693	0.0766685	0	0.0724579	0.14434
1226	SVE_0594300	0.0652541	0.127591	0	0	0.368114	0.179	0.0624756	0.0612281	0	0	0	0
1227	SVE_0594700	0.196472	0.259797	0.0669597	0.130715	0	0	0.0651112	0.0634292	0	0.0748972	0.208435	0.0686221
1228	SVE_0595500	0.194838	0.297945	0.188225	0	0.464692	0.340662	0	0.123101	0.0759092	0	0.0711097	0.140977
1229	SVE_0595800	0.0665026	0	0	0	0	0	0.130702	0	0	0.0763917	0.0357206	0
1230	SVE_0595900	0	0	0	0	0	0	0.107395	0.0857439	0.183394	0.361458	0.372545	0.0802198
1231	SVE_0596000	0.0663203	0.0442466	0	0	0	0	0.146735	0.125302	0.0775351	0.0762991	0.278277	0.212297
1232	SVE_0596100	0.210995	0	0	0	0	0.134873	0	0	0	0.0986553	0	0
1233	SVE_0596200	0.146964	0.532986	0	0.0720003	0	0.0219749	0	0.234122	0.100651	0	0	0.199602
1234	SVE_0596400	0	0	0	0	0	0	0	0	0	0	0	0
1235	SVE_0596500	0	0.0633398	0	0	0.629006	0.439927	0.188411	0	0.0779504	0	0	0
1236	SVE_0596600	0.129382	0.126686	0	0	0.538061	0.791356	0.0630079	0.123994	0	0	0.150427	0
1237	SVE_0596700	0	0	0	0	0.456735	0.355571	0.186147	0.121563	0	0	0.0733629	0.145055
1238	SVE_0596800	0	0	0	0	0.283611	0.275256	0.128675	0.0627789	0.0772535	0.0750594	0.209421	0.0692015
1239	SVE_0596900	0	0	0	0	0.362589	0.354113	0.187717	0.184776	0.0776777	0	0.298196	0
1240	SVE_0597100	0	0	0	0	0	0.0878555	0.250945	0.283937	0.155839	0.229224	0.0747132	0.0738835
1241	SVE_0597200	0	0	0	0.0603067	0.0926429	0.18091	0.188657	0.184205	0.384066	0.226437	0.0738818	0.0730616
1242	SVE_0597300	0.191628	0	0.193426	0.0627835	0.464147	0.269233	0.189366	0	0	0	0	0.133184
1243	SVE_0597800	0	0	0	0	0	0	0	0	0.0769974	0.0755996	0	0.0735394
1244	SVE_0597900	0	0	0	0	0	0	0.0638219	0.188059	0	0.0772593	0.0756118	0
1245	SVE_0598000	0	0	0	0	0	0	0	0.0623213	0	0	0.0746159	0
1246	SVE_0598100	0	0	0	0	0	0	0	0	0	0.0745859	0.0732512	0.0724347
1247	SVE_0598200	0	0	0	0	0.26614	0.260225	0	0	0	0	0.070541	0
1248	SVE_0598300	0	0	0	0	0.182817	0.0888269	0.0622921	0.0611653	0	0	0.0739019	0
1249	SVE_0598400	0	0	0	0	0	0	0	0.0632609	0.157919	0.0772315	0	0
1250	SVE_0599300	0.0651176	0.255107	0	0	0	0	0	0	0	0	0	0
1251	SVE_0599400	0.0646815	0.190138	0	0	0	0	0.0641162	0.0629999	0.235845	0.0768956	0.14845	0.218699
1252	SVE_0600700	0.12938	0.113476	0	0	0	0	0.429378	0.18906	0.121767	0.153785	0.131159	0.0933353
1253	SVE_0603000	0.0643103	0.0631702	0.124461	0	0.183229	0	0	0	0	0	0	0
1254	SVE_0603100	0	0	0	0	0	0	0	0	0	0	0	0
1255	SVE_0603600	0	0	0	0	0.0884733	0.0863965	0.19057	0.124926	0.235848	0	0.0750374	0
1256	SVE_0603700	0	0	0	0	0	0	0.0637742	0.234099	0.549195	0.230187	0.297155	0.145898
1257	SVE_0603800	0.0651796	0	0	0	0	0	0	0	0	0	0	0
1258	SVE_0603900	0	0	0	0	0	0	0	0	0	0	0	0.0712271
1259	SVE_0604000	0	0	0	0	0	0	0.188881	0.372094	0.234441	0.306113	0.375461	0.521094
1260	SVE_0604200	0	0	0	0	0	0	0	0	0.153279	0	0.0740321	0
1261	SVE_0604300	0	0	0	0	0	0	0.000442181	0	0	6.00654e-05	0	0
1262	SVE_0604400	0.24336	0.440866	0.121493	0.0594961	0.090687	0.0887387	0.126493	0.310907	0.221579	0.076955	0.301211	0.0745454
1263	SVE_0604500	0.188146	0.127402	0.0320168	0.108729	0.887128	0.618749	0.126894	0.0624694	0.078892	0	0.0756817	0.149427
1264	SVE_0606600	0	0	0.0602984	0	0.179862	0.175953	0	0	0	0	0	0
1265	SVE_0607000	0.195866	0.575828	0	0.0605251	0.35615	0.608844	0.06468	0.127121	0	0.0776519	0	0
1266	SVE_0607400	0	0.06332	0	0	0	0	0.192058	0.125821	0	0.230535	0.0742364	0.218723
1267	SVE_0607500	0.260712	0	0.0607571	0.237843	0	0.353853	0.12726	0.125369	0.158191	0.0774137	0.151764	0.0748887
1268	SVE_0607600	0	0	0.133367	0	0	0	0.0652525	0.0636005	0	0	0	0.0688943
1269	SVE_0608000	0	0	0	0	0.349939	0.513972	0	0	0	0	0	0
1270	SVE_0609100	0	0	0	0	0	0	0	0	0	0	0	0
1271	SVE_0609200	0	0	0	0	0	0	0.125812	0.123993	0	0.153014	0.0749805	0.148926
1272	SVE_0609300	0	0	0	0	0	0	0.0713669	0	0.0785045	0	0	0.165199
1273	SVE_0609400	0	0	0	0	0	0	0.0786748	0.126656	0.0795997	0.0778562	0	0
1274	SVE_0609500	0	0	0	0	0	0	0	0	0	0	0	0
1275	SVE_0609600	0	0	0	0	0	0	0.0629645	0	0	0.0766119	0	0.0742131
1276	SVE_0609700	0.0651797	0	0	0	0	0	0	0	0	0	0	0
1277	SVE_0609800	0	0	0	0	0	0	0	4.79303e-09	0	0	0.107426	0
1278	SVE_0609900	0	0	0	0	0.0876158	0	0	0	0	0	0	0
1279	SVE_0610300	0.129229	0.316669	0	0	0	0	0.127867	0.628409	0.235957	0.538445	0.223424	0.51192
1280	SVE_0610500	0	0	0	0	0	0	0	0.0614729	0	0.227292	0.148296	0.220811
1281	SVE_0610600	0	0	0	0	0	0	0.0656229	0	0	0.0765589	0	0
1282	SVE_0610700	0.129195	0	0	0	0	0	0.511428	0.439836	0	0.230671	0.148845	0.146164
1283	SVE_0610900	0	0	0	0	0	0	0	0.103657	0	0	0	0
1284	SVE_0611000	0.0651517	0	0	0	0.737603	0.360092	0.0625852	0.121623	0.152893	0	0	0.0727127
1285	SVE_0611200	0.194883	0.38158	0	0	0.181631	0.177439	0.31278	0.123343	0	0.0760525	0.37311	0
1286	SVE_0611300	0.19489	0.508772	0	0	0	0.086002	0.5179	0.3813	0.471668	0.307699	0	0.0723327
1287	SVE_0611400	0.0645891	0.063302	0	0	0	0	0.063649	0	0.157469	0.0769971	0.150147	0
1288	SVE_0611500	0.129904	0.190907	0	0	0	0	0.255398	0.251149	0.0791221	0	0	0.148752
1289	SVE_0611600	0.129052	0.126481	0	0	0	0	0.127047	0.187411	0.0786636	0.076898	0.150186	0.147384
1290	SVE_0611700	0	0.0635582	0.243849	0	0	0	0.191981	0.377626	0.0790612	0.1546	0.0751882	0.0738193
1291	SVE_0611800	0	0	0	0	0	0	0.0654972	0	0	0	0	0
1292	SVE_0611900	0	0	0	0	0	0	0	0	0	0	0	0
1293	SVE_0612000	0	0	0	0	0	0	0	0.064199	0	0	0	0
1294	SVE_0612100	0	0	0	0	0	0	0	0	0	0.0767058	0	0
1295	SVE_0612200	0	0	0	0	0	0	0	0	0	0	0	0
1296	SVE_0612300	0.0657474	0	0	0	0	0	0.065718	0	0.0774006	0	0	0
1297	SVE_0612400	0.32511	0.191239	0	0	0	0	0.125989	0.0620922	0.156671	0.153172	0.0750032	0.0743362
1298	SVE_0612600	0	0	0	0	0	0	0.0669191	0	0.0789344	0.152937	0	0.0694135
1299	SVE_0612700	0	0	0	0	0	0	0.189579	0.124279	0.155831	0.153124	0.149851	0.07436
1300	SVE_0612800	0	0	0	0	0	0	0.0640085	0	0.158611	0.0775382	0	0
1301	SVE_0612900	0	0	0	0	0	0	0.0639942	0.0628806	0	0	0.0740954	0.0727725
1302	SVE_0613000	0	0	0	0	0.0903178	0.0887906	0	0.112984	0	0	0	0
1303	SVE_0613100	0.0656175	0	0	0	0	0	0.126719	0.124762	0	0.0770557	0	0.0750008
1304	SVE_0613200	0	0.126988	0	0	0	0	0.582272	0.411795	0.516454	0.307057	0.0733536	0.3525
1305	SVE_0613300	0	0	0	0	0.182105	0.53089	0	0.182915	0	0.0752001	0	0
1306	SVE_0613400	0	0	0	0	0	0	0.12599	0	0.0782824	0.0765219	0	0.148653
1307	SVE_0613500	0.065078	0	0	0	0	0.266462	0.252083	0.0786974	0.0783596	0	0.225219	0
1308	SVE_0613600	0	0	0	0	0	0	0.324092	0.0632892	0.0791743	0.155599	0	0
1309	SVE_0613700	0.13265	0	0	0	0	0	0.131881	0.0642372	0	0	0	0.0694962
1310	SVE_0613800	0.0665608	0	0	0	0	0	0.0640966	0.189572	0.0796562	0	0	0
1311	SVE_0613900	0	0	0.12681	0	0	0	0.191736	0.125184	0.389528	0.0766025	0.148611	0.221385
1312	SVE_0614000	0.0659661	0.130088	0.0632363	0.06156	0	0.365767	0.442422	0.558843	0.385053	0.22695	0.290862	0.28986
1313	SVE_0614100	0	0	0	0	0.0899663	0	0.0645316	0.12693	0	0	0	0
1314	SVE_0614200	0.130627	0.0639724	0.0610435	0	0.244331	0.351482	0	0.252457	0	0	0	0
1315	SVE_0614300	0.0636307	0	0	0	0	0	0	0	0	0	0	0.0729682
1316	SVE_0614400	0	0	0	0	0	0	0	0	0	0	0	0
1317	SVE_0614500	0	0	0	0	0	0	0	0	0	0	0	0
1318	SVE_0614600	0	0	0	0	0.108805	0	0	0	0.127241	0.152412	0.186369	0
1319	SVE_0614700	0.0653126	0	0	0	0	0	0.1302	0.356325	0.0790195	0	0	0
1320	SVE_0614800	0	0	0	0	0	0	0	0	0	0	0	0
1321	SVE_0614900	0	0.0636684	0	0	0	0	0.372929	0.27034	0.0784838	0.230478	0	0.381806
1322	SVE_0615000	0	0	0	0	0	0	0.0653798	0.128629	0	0	0	0
1323	SVE_0615100	0.0648163	0	0	0	0	0	1.03268	0.570304	0.235446	0.307174	0.147144	0.506045
1324	SVE_0615200	0	0	0	0	0	0	0.577698	0.252311	0.078789	0.154124	0.148917	0
1325	SVE_0615300	0	0	0	0	0	0	0.0646314	0.127026	0.237997	0.155187	0	0
1326	SVE_0615400	0	0	0	0	0	0	0	0.062732	0.0792064	0.155289	0	0
1327	SVE_0615500	0	0	0	0	0	0	0	0.063174	0.0796101	0	0	0
1328	SVE_0615600	0	0	0	0	0	0	0	0	0	0	0	0.0712269
1329	SVE_0615700	0	0	0	0	0	0	0.127835	0.125626	0	0	0.0741838	0.0728538
1330	SVE_0615800	0	0	0	0	0	0	0.0646731	0.0636008	0.0800872	0	0	0
1331	SVE_0616100	0	0	0.609934	0.596932	0.454337	0.355616	0	0	0	0.0774857	0	0
1332	SVE_0616300	0.260393	0.25508	0.243592	0.476694	0.0895218	0	0.192011	0.440925	0.158637	0.155089	0.0757542	0.148887
1333	SVE_0617000	0	0.0645593	0	0	0	0.0912939	0	0.0935494	0.052097	0.109995	0	0
1334	SVE_0617200	0.257959	0.0632241	0	0	0	0	0	0	0.233082	0	0.0743888	0
1335	SVE_0618000	0.327656	0.128325	0.244963	0.539416	0.366515	0.357947	0.18975	0.124517	0.0785188	0.0768532	0.0753563	0
1336	SVE_0618200	0	0.262121	0	0	0	0	0.0635914	0	0	0.0760232	0.146403	0
1337	SVE_0618300	0.711135	0.443551	0	0	0.0888225	0.0868017	0.254455	0.312937	0	0.0770687	0	0.295445
1338	SVE_0619100	0.0649622	0.127335	0.182299	0.0594351	0.178834	0.0872982	0.191672	0.125638	0.158312	0.154828	0.0756934	0.0743664
1339	SVE_0619800	0.26037	0.191382	0	0	0	0.0886755	0.126185	0.434428	0.156661	0.153506	0.150231	0
1340	SVE_0619900	0.0651655	0.191391	0.249913	0.183355	0	0	0.324618	0.382412	0.157742	0.154356	0.073878	0.145193
1341	SVE_0622300	0.0643467	0.0640772	0.0660923	0	0	0	0	0.062275	0	0	0	0
1342	SVE_0622800	0.131149	0.0642295	0.0611317	0.119665	0	0	0.191205	0.18794	0.0791394	0.155283	0.303493	0.0750363
1343	SVE_0623100	0.064977	0.191028	0	0	0.714322	1.30889	0.127858	0.125819	0	0.0774705	0	0
1344	SVE_0623400	0.130363	0.0639062	0.429969	0.240379	0.0891372	0	0	0	0	0.310725	0	0.0740243
1345	SVE_0626000	0.107144	0.191821	0	0.0618409	0.533728	0.272254	0.188403	0.30855	0	0	0	0.0690814
1346	SVE_0626300	0	0	0	0	0	0	0	0.0619835	0	0	0.0750274	0
1347	SVE_0626400	0	0.128518	0.245643	0.102423	0.0494849	0.138544	0.015945	0	0	0	0	0
1348	SVE_0626700	0	0	0.186751	0.210906	0.151544	0.100993	0.0647517	0	0	0	0.0739139	0.123708
1349	SVE_0626800	0	0	0	0.0808665	0.113604	0.266338	0	0	0	0	0	0.0218296
1350	SVE_0626900	0.20109	0	0	0.09255	0.218479	0.320227	0.242624	0	0.0791493	0	0	0
1351	SVE_0627000	0	0	0	0	0	0	1.02185	0.881088	0.23536	0	0.222574	0.221081
1352	SVE_0627200	0.320857	0.188763	0	0	0.358142	0.193321	0	0.0611081	0.0770378	0	0.0739224	0.0733578
1353	SVE_0627400	0.126357	0	0	0	0.527811	0.172337	0	0	0	0	0.145731	0.0722284
1354	SVE_0628500	0.260713	0.319011	0.364276	0.297415	0.180085	0.0882707	0	0.0627173	0.237578	0	0	0.149407
1355	SVE_0628600	0.0652991	0	0.0611761	0.179614	0.089604	0.174994	0	0.063242	0	0	0.0759736	0
1356	SVE_0628700	0	0	0	0	0	0	0.064713	0	0	0.0767325	0.0732783	0
1357	SVE_0629900	0.0623005	0	0.126525	0.123345	0.272452	0.526111	0	0	0	0	0	0
1358	SVE_0631100	0	0	0	0	0	0	0	0.0641991	0	0	0	0
1359	SVE_0631200	0.392138	0.320308	0	0	0	0	0.125824	0.371321	0	0.381398	0.0748836	0.371689
1360	SVE_0632200	0.126796	0	0.126799	0.12422	0.276802	0.0892154	0	0	0	0.0723457	0	0
1361	SVE_0633200	0.0533441	0.0636649	0.31857	0.154496	0.373358	0.311087	0.0636804	0.0934364	0.135804	0.0733721	0	0
1362	SVE_0633600	0.0645152	0.0632274	0	0	0	0	0.254589	0.125197	0.157365	0.384798	0.0749006	0.0735238
1363	SVE_0633700	0.323231	0.126528	0	0	0	0	0.252868	0.311347	0.314167	0.230518	0.226025	0.518528
1364	SVE_0633800	0	0	0	0.0594079	0.0904806	0	0.379696	0	0	0.154181	0	0.149008
1365	SVE_0633900	0.130082	0.0637037	0.124055	0.0606798	0.176839	0.0863616	0.323169	0.723372	0.236664	0.540246	0.148379	0.0918703
1366	SVE_0634000	0	0	0	0	0	0	0	0	0	0	0	0
1367	SVE_0634100	0	0	0.0646412	0	0	0	0	0.126462	0	0	0.0723787	0
1368	SVE_0634200	0	0	0	0	0	0	0	0	0.156672	0	0	0
1369	SVE_0635500	0.195544	0.255761	0.303766	0.416804	0.181502	0.17774	0.126388	0.124382	0	0.0768866	0.0752689	0.149136
1370	SVE_0639100	0	0	0	0	0	0	0	0	0	0	0.0720373	0.071609
1371	SVE_0639200	0.130907	0.128306	0.122625	0.119951	0	0.0878821	0.0644056	0.190099	0	0.078028	0.152448	0
1372	SVE_0640200	0.58378	0.317516	0	0	0	0	0.129236	0.0634361	0.235539	0.384133	0.367766	0.0722769
1373	SVE_0641800	0.065093	0.0639336	0	0.0598649	0.275759	0.53595	0.0626742	0.0615528	0	0	0	0.147536
1374	SVE_0641900	0.0650926	0.063801	0	0	0	0	0	0	0	0	0	0
1375	SVE_0642000	0	0	0	0	0	0	0	0	0	0	0	0
1376	SVE_0642100	0	0	0	0	0	0	0	0.0624247	0	0	0	0.0732609
1377	SVE_0642200	0	0.0645339	0	0	0	0	0.0649681	0.0639036	0	0	0	0
1378	SVE_0642400	0	0	0	0	0.0886578	0	0.0638889	0.0628421	0	0	0	0.0737503
1379	SVE_0642500	0	0	0	0	0.0893036	0	0.0642629	0	0	0	0	0
1380	SVE_0642600	0	0	0.250305	0.183644	0.177184	0.346086	0.06505	0.0638635	0	0	0.0741091	0
1381	SVE_0644300	0.649145	0.12815	0.311961	0.48545	0.18509	0	0	0	0	0	0.0716675	0
1382	SVE_0644900	0.130973	0.128439	0.183738	0.239516	0.091444	0	0.189705	0.186723	0.0785102	0	0.0753914	0.0748502
1383	SVE_0645200	0	0	0.0622558	0	0.370138	0.811593	0	0.0610977	0	0.149107	0.143572	0.0715013
1384	SVE_0645300	0.128578	0.0629466	0	0	0	0.0877896	0	0	0	0	0	0
1385	SVE_0645500	0.066372	0.0650731	0.128771	0.313525	0	0	0.191699	0.126016	0.0771956	0	0	0
1386	SVE_0645800	0	0	0	0	0	0	0	0	0.0783356	0	0	0
1387	SVE_0645900	0.277751	0.190887	0	0	0	0.0872555	0.0638759	0	0.0791424	0	0	0
1388	SVE_0646000	0	0.0654812	0	0	0	0	0.0643144	0	0	0	0.071777	0
1389	SVE_0646600	0.0661814	0	0	0	0	0	0.0652446	0.127563	0.0779596	0	0	0
1390	SVE_0646700	0	0	0	0	0	0	0.190544	0.250065	0.236571	0.0772342	0.151449	0
1391	SVE_0646800	0.260271	0.127408	0	0	0.0913582	0	0.313284	0.246521	0.0775584	0.455715	0.149065	0.0740873
1392	SVE_0646900	0.260928	0.063841	0.0609866	0	0	0.0891119	0.629231	0.433785	0.390553	0	0.300091	0.372622
1393	SVE_0647200	0	0.129572	0	0	0	0	0	0	0	0.075442	0	0
1394	SVE_0647300	0.0648857	0	0	0	0	0	0.0639062	0.439941	0.0790954	0	0.150956	0
1395	SVE_0647400	0.0659654	0.0653478	0	0	0	0	0.195992	0.127112	0.233713	0.0752758	0	0
1396	SVE_0647500	0	0	0	0	0	0	0.254433	0.125081	0	0	0.149085	0.0731846
1397	SVE_0647600	0.457887	0.321444	0.123728	0.0603047	0.277525	0.0905187	0	0.245842	0	0.0754105	0	0
1398	SVE_0647900	0	0	0	0	0	0	0	0	0	0.0767056	0	0
1399	SVE_0648100	0.130598	0	0.213075	0	0.0885559	0.176717	0.0688835	0	0	0	0	0
1400	SVE_0648200	0	0.0643434	0.0616824	0.0603575	0	0	0.0647576	0.127388	0.0800706	0	0.228547	0
1401	SVE_0648400	0.58646	0.191584	0.183117	0.238905	0.178852	0	0.320721	0.189252	0	0.155306	0.15168	0.372066
1402	SVE_0649500	0.065167	0.319144	0.121813	0.119159	0.807732	0.350694	0	0.0629728	0	0.0776431	0.0759006	0
1403	SVE_0649600	0.751689	0.508686	0	0	0.0877493	0.0856808	0.325173	0.255179	0.313569	0.15347	0.145895	0.0717125
1404	SVE_0649800	0	0	0	0	0	0	0	0	0	0	0	0
1405	SVE_0649900	0.0650459	0	0	0	0	0	0.0650899	0	0	0.15357	0	0.143494
1406	SVE_0650000	0.0649662	0.19108	0	0	0	0	0	0.0630495	0.0792548	0.154979	0	0
1407	SVE_0650100	0.202759	0.518307	0	0	0	0	0.133516	0.192101	0.156856	0.230347	0	0.143083
1408	SVE_0650300	0	0	0	0	0	0	0.193759	0.0633996	0.078401	0.153441	0.146779	0.0721193
1409	SVE_0650400	0.06506	0.191312	0.0614939	0.0601617	0	0.086787	0.643745	0.126548	0.237584	0.0774514	0.149976	0.473264
1410	SVE_0650800	0	0	0	0	0	0.0903229	0.0620549	0	0	0	0	0
1411	SVE_0650900	0.0649989	0.190794	0	0	0	0	0.0649675	0.50993	0	0.0767955	0.365638	0.220573
1412	SVE_0651000	0	0	0	0	0	0	0.064314	0.125722	0	0	0.0753473	0
1413	SVE_0651200	0.155444	0	0	0	0.232775	0.409088	0.0330405	0	0.0102873	0	0	0.0455123
1414	SVE_0651700	0.261435	0.192495	0.0634801	0	0.280359	0.365013	0.125955	0.123741	0.0760652	0	0.0705398	0
1415	SVE_0652500	0.130303	0	0	0	0.46813	0	0	0.124047	0	0	0	0.0690966
1416	SVE_0652600	0	0.191343	0	0	0.0927387	0.0910664	0.0624284	0.0615547	0	0	0.0704595	0
1417	SVE_0652900	0.0647608	0.126966	0	0.0598239	1.06169	0.864348	0.0640467	0.188873	0.157727	0.0771241	0.224202	0.0733825
1418	SVE_0653000	0.130371	0.192698	0	0	0.0929283	0.272486	0.0624183	0.123158	0.0762086	0	0.0717878	0.142961
1419	SVE_0653100	0.125707	0.0625904	0.0645587	0.252172	0.367635	0.354374	0	0.06083	0	0	0	0
1420	SVE_0654000	0.357766	0.295673	0.206416	0.610396	0.363223	0.296747	0	0	0.0786388	0	0	0
1421	SVE_0654100	0.337277	0.738865	0.308521	0.270713	0.121146	0.593851	0	0	0	0	0	0
1422	SVE_0654200	0	0	0.0620738	0.161903	0	0	0.0641463	0	0	0.0779697	0.190724	0
1423	SVE_0654400	0.513404	0.566047	0	0	0.528428	0.344122	0.0631724	0	0.156463	0.152953	0.149382	0.0732864
1424	SVE_0654500	0	0.0638011	0	0	0	0.0893178	0	0.061427	0	0	0	0
1425	SVE_0654600	0.065455	0.128309	0	0	0	0	0	0.0634931	0	0	0	0
1426	SVE_0654700	0.066989	0.131343	0.186137	0.0608879	0.272115	0.088596	0.132066	0.127347	0	0	0.0790076	0
1427	SVE_0654800	0.191672	0.0634902	0.0636137	0.0622646	0.37167	0.179731	0.0633271	0	0	0	0	0.0678827
1428	SVE_0655100	0.0636642	0.126276	0	0	0.18662	0.358447	0.126591	0.184982	0	0	0	0
1429	SVE_0655200	0.131237	0.385865	0	0	0	0	0	0.0624899	0.0787481	0.0771606	0	0
1430	SVE_0655300	0.265137	0.259421	0	0	0	0	0.12767	0.18862	0.0793143	0	0	0
1431	SVE_0655500	0.130698	0.128288	0	0	0	0.0897361	0	0.123575	0.0774855	0.0761667	0	0
1432	SVE_0655800	0.0653476	0	0.186822	0.182763	0	0	0	0	0.0792832	0	0	0.0732874
1433	SVE_0656200	0	0	0	0	0	0	0	0	0	0	0	0
1434	SVE_0656600	0.0651798	0	0	0	0	0	0	0	0	0	0	0
1435	SVE_0657000	0	0	0.361517	0.0590553	0.180163	0.264613	0	0	0.15571	0.0761163	0.0745434	0.0738804
1436	SVE_0657300	0.13034	0.191535	0.243018	0.950952	0.0905748	0.177374	0.253218	0.186659	0.0785722	0.154091	0.301639	0.148948
[truncated: 3,177 more rows]
